# Supplementary material
Source: PubMed Central journal article supplement (PMC6218879)
Supplement: ol8b02232_si_001.pdf [file ol8b02232_si_001.pdf]

## Supporting Information

### **Stereoselective Synthesis of Fused Vinylcyclopropanes by Intramolecular Tsuji-Trost Cascade Cyclization**

John Braun,<sup>a</sup> Maxim I. Ariëns,<sup>a</sup> Bianca T. Matsuo,<sup>a</sup> Steven de Vries,<sup>a</sup> Ellen D. H. van Wordragen,<sup>a</sup>  
Brecht D. Ellenbroek,<sup>a</sup> Christophe M. L. Vande Velde,<sup>b</sup> Romano V. A. Orru<sup>a</sup> and Eelco Ruijter\*<sup>a</sup>

<sup>a</sup> *Department of Chemistry & Pharmaceutical Sciences and Amsterdam Institute for Molecules, Medicines & Systems (AIMMS), Vrije Universiteit Amsterdam, De Boelelaan 1108, 1081 HZ Amsterdam, The Netherlands*

<sup>b</sup> *Faculty of Applied Engineering, Advanced Reactor Technology, University of Antwerp, Groenenborgerlaan 171, 2020 Antwerpen, Belgium*

Email: e.ruijter@vu.nl

## Contents

|                                                          |    |
|----------------------------------------------------------|----|
| General information.....                                 | 3  |
| General procedures.....                                  | 4  |
| Optimization of the Tsuji-Trost cyclization cascade..... | 5  |
| Structural analysis of vinylcyclopropanes .....          | 6  |
| SFC-MS analysis of enantiomeric excess .....             | 6  |
| X-ray analysis.....                                      | 8  |
| Synthetic procedures.....                                | 9  |
| Esters .....                                             | 9  |
| Alcohols .....                                           | 11 |
| Bromides .....                                           | 12 |
| Amines.....                                              | 13 |
| Acetals .....                                            | 15 |
| Diacetates.....                                          | 23 |
| Vinylcyclopropanes .....                                 | 30 |
| 1.0 mmol scale experiment .....                          | 30 |
| Vinylcyclopropane rearrangement.....                     | 35 |
| Vinylcyclopropane cycloaddition .....                    | 36 |
| NMR spectra.....                                         | 39 |
| Esters .....                                             | 39 |
| Alcohols .....                                           | 41 |
| Bromides .....                                           | 43 |
| Amines.....                                              | 45 |
| Acetals .....                                            | 47 |
| Diacetates.....                                          | 62 |
| Vinylcyclopropanes .....                                 | 76 |
| Vinylcyclopentane rearrangement.....                     | 87 |
| Vinylcyclopropane cycloaddition .....                    | 89 |
| References.....                                          | 91 |

## General information

Commercially available reagents were purchased from Sigma-Aldrich, Fischer, Strem Chemicals or Fluorochem and were used as purchased unless mentioned otherwise. Solvents were purchased from VWR Chemicals or Sigma-Aldrich and used without purification, unless stated otherwise. Anhydrous, air-free solvents were obtained from a PureSolv MD 5 solvent purification system. Infrared (IR) spectra were recorded neat using a Shimadzu FTIR-8400s spectrophotometer and wavenumbers are reported in  $\text{cm}^{-1}$ . Nuclear magnetic resonance (NMR) spectra were recorded on a Bruker Avance 600 (150.90 MHz for  $^{13}\text{C}$ ), Bruker Avance 500 (125.78 MHz for  $^{13}\text{C}$ ) or Bruker Avance 300 (75.26 MHz for  $^{13}\text{C}$ ) using the residual  $\text{CHCl}_3$  as internal standard ( $^1\text{H}$ :  $\delta$  7.26 ppm,  $^{13}\text{C}\{^1\text{H}\}$ :  $\delta$  77.16 ppm). Chemical shifts ( $\delta$ ) are given in ppm and coupling constants ( $J$ ) are quoted in hertz (Hz). Resonances are described as s (singlet), d (doublet), t (triplet), q (quartet), br (broad singlet) and m (multiplet) or combinations thereof. Electrospray Ionization (ESI) high-resolution mass spectrometry was carried out using a Bruker micrOTOF-Q instrument in positive ion mode (capillary potential of 4500 V). Flash chromatography was performed on Silicycle Silica-P Flash Silica Gel (particle size 40-63  $\mu\text{m}$ , pore diameter 60  $\text{\AA}$ ) using the indicated eluent. Thin Layer Chromatography (TLC) was performed using TLC plates from Merck ( $\text{SiO}_2$ , Kieselgel 60 F254 neutral, on aluminium with fluorescence indicator) and compounds were visualized by UV detection (254 nm) and/or  $\text{KMnO}_4$  stain. SFC-MS analysis was conducted using a Shimadzu Nexera SFC-MS equipped with a Nexera X2 SIL-30AC autosampler, Nexera UC LC-30AD SF  $\text{CO}_2$  pump, Nexera X2 LC-30AD liquid chromatograph, Nexera UC SFC-30A back pressure regulator, prominence SPD-M20A diode array detector, prominence CTO-20AC column oven and CBM-20A system controller. Enantiomeric excess was determined by SFC-MS analysis using a Lux<sup>®</sup> 3  $\mu\text{m}$  Cellulose-3 column (cellulose tris(4-methylbenzoate), 150 x 4.6 mm). A gradient of supercritical  $\text{CO}_2$  (A) and methanol (B) was used. Method 1: 0% B/100% A  $\rightarrow$  30% B/70% A over the course of 15 min. and was maintained at 30% B/70% A for 2 min. Method 2: 0% B/100% A  $\rightarrow$  20% B/80% A over the course of 15 min. and was maintained at 20% B/80% A for 2 min. Method 3: 0% B/100% A  $\rightarrow$  30% B/70% A over the course of 20 min. and was maintained at 30% B/70% A for 2 min. Method 4: 0% B/100% A  $\rightarrow$  20% B/80% A over the course of 20 min. and was maintained at 20% B/80% A for 2 min. The flow was maintained at 1.0 mL/min and the sample injection volume was 5  $\mu\text{L}$ . Mass spectrometry analyses were performed using a Shimadzu LCMS-2020 mass spectrometer. The data were acquired in full-scan APCI mode (MS) from  $m/z$  100 to 800 in positive ionisation mode. Data was processed using Shimadzu Labsolutions 5.82. Specific rotations were measured with an automatic AA-10 polarimeter.

## General procedures

### Procedure A: Appel reaction of allylic alcohol to allylic bromide

The corresponding allylic alcohol (1.0 equiv) was dissolved in anhydrous  $\text{CH}_2\text{Cl}_2$  (0.24 M) and cooled to 0 °C. Subsequently, tetrabromomethane (1.1 equiv) and triphenylphosphine (1.1 equiv) were added and the reaction mixture was stirred for 3 h at 0 °C. The reaction mixture was concentrated and purified by silica gel column chromatography as described in the corresponding synthetic procedure.

### Procedure B: Formation of allylic amine ( $\text{S}_{\text{N}}2$ substitution of the allylic bromide)

To a suspension of the corresponding amine (2.0 equiv) and cesium carbonate (2.0 equiv) in anhydrous DMF (0.2 M) was added a solution of the corresponding allylic bromide (1.0 equiv) in anhydrous DMF (1.0 M). The reaction mixture was heated to 65 °C and was stirred for 2 h. The reaction mixture was diluted with EtOAc and washed with sat. aq.  $\text{NaHCO}_3$  (5 $\times$ ), dried ( $\text{Na}_2\text{SO}_4$ ), filtered and concentrated under reduced pressure. The crude was used directly in the next reaction without purification.

### Procedure C: Amide formation from allylic amine and ester

To a solution of the corresponding allylic amine (1.0 equiv) in dry toluene (0.2 M) was added 4-dimethylaminopyridine (0.2 equiv) and the corresponding ester (1.2 equiv). The reaction mixture was heated to 80 °C and was stirred for 16 h. The reaction mixture was cooled to room temperature and concentrated under reduced pressure. The crude product was purified by silica gel column chromatography as described in the corresponding synthetic procedure.

### Procedure D: Amide formation from allylic amine and carboxylic acid

To a solution of the corresponding allylic amine (1.0 equiv) in dry  $\text{CH}_2\text{Cl}_2$  (0.1 M) at 0 °C was added 4-dimethylaminopyridine (0.1 equiv), EDC·HCl (1.3 equiv) and the corresponding carboxylic acid (1.3 equiv). The reaction mixture was stirred overnight at room temperature. The organic layer was washed with  $\text{H}_2\text{O}$  (3 $\times$ ) and brine, and the organic layer was dried ( $\text{Na}_2\text{SO}_4$ ), filtered and concentrated under reduced pressure. The crude product was purified by silica gel column chromatography as described in the corresponding synthetic procedure.

### Procedure E: Acetal deprotection

The corresponding acetal protected diol (1.0 equiv) was dissolved in THF (0.8 M) and an aqueous solution of AcOH (80% v/v, 44 equiv) was added. The reaction mixture was stirred at 65 °C for 12 h. The reaction mixture was concentrated and co-evaporated with toluene (3 $\times$ ). The crude product (1.0 equiv) was subsequently dissolved in pyridine (0.2 M) and acetic anhydride (2.3 equiv) was added dropwise. The reaction mixture was stirred overnight at room temperature. The reaction mixture was concentrated and co-evaporated with toluene (3 $\times$ ). The crude product was purified by silica gel column chromatography as described in the corresponding synthetic procedure.

### Procedure F: Tsuji-Trost cascade cyclization

To a flamedried flask, containing a solution of the corresponding diacetate (1.0 equiv) in anhydrous and degassed DMF (0.1 M) was added  $\text{Pd}(\text{PPh}_3)_4$  (0.1 equiv) and *N,N,N,N'*-tetramethylguanidine (2.0 equiv). The reaction mixture was heated to 80 °C and stirred for 5 - 8 h. The reaction mixture was cooled to room temperature, diluted with EtOAc and quenched with sat. aq.  $\text{NH}_4\text{Cl}$  solution. The organic phase was washed with sat. aq.  $\text{NH}_4\text{Cl}$  (2 $\times$ ) and brine, dried ( $\text{Na}_2\text{SO}_4$ ), filtered and concentrated under reduced pressure. The crude product was purified by silica gel column chromatography as described in the corresponding synthetic procedure.

## Optimization of the Tsuji-Trost cyclization cascade

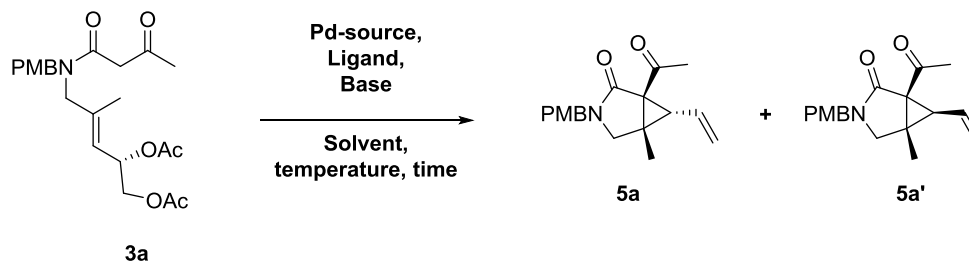

Optimization table<sup>a</sup>

|           | Pd-source                              | ligand           | base       | solvent                                       | temp. (°C) | time (h) | Yield <sup>b</sup> (%) | <i>dr</i><br>(5a / 5a') |
|-----------|----------------------------------------|------------------|------------|-----------------------------------------------|------------|----------|------------------------|-------------------------|
| 1         | Pd(PPh <sub>3</sub> ) <sub>4</sub>     | -                | DBU        | PhMe                                          | 20         | 16       | 0 <sup>c</sup>         |                         |
| 2         | Pd(PPh <sub>3</sub> ) <sub>4</sub>     | -                | DBU        | PhMe                                          | 80         | 16       | 52                     | 3 : 1                   |
| 3         | Pd(PPh <sub>3</sub> ) <sub>4</sub>     | -                | DBU        | THF                                           | 65         | 16       | 45                     | 3 : 1                   |
| 4         | Pd(PPh <sub>3</sub> ) <sub>4</sub>     | -                | DBU        | CH <sub>2</sub> Cl <sub>2</sub>               | 40         | 16       | 45                     | 3 : 1                   |
| 5         | Pd(PPh <sub>3</sub> ) <sub>4</sub>     | -                | DBU        | C <sub>2</sub> H <sub>4</sub> Cl <sub>2</sub> | 85         | 16       | 40                     | 3 : 1                   |
| 6         | Pd(PPh <sub>3</sub> ) <sub>4</sub>     | -                | DBU        | DMF                                           | 80         | 16       | 65                     | 9 : 1                   |
| 7         | Pd(OAc) <sub>2</sub>                   | PPh <sub>3</sub> | DBU        | DMF                                           | 80         | 16       | 65                     | 9 : 1                   |
| 8         | Pd(OAc) <sub>2</sub>                   | XantPhos         | DBU        | DMF                                           | 80         | 16       | 0 <sup>c</sup>         |                         |
| 9         | Pd(OAc) <sub>2</sub>                   | DPEPhos          | DBU        | DMF                                           | 80         | 16       | 35                     | 3 : 7                   |
| <b>10</b> | <b>Pd(PPh<sub>3</sub>)<sub>4</sub></b> | -                | <b>TMG</b> | <b>DMF</b>                                    | <b>80</b>  | <b>5</b> | <b>75</b>              | <b>9 : 1</b>            |
| 11        | Pd(PPh <sub>3</sub> ) <sub>4</sub>     | -                | TMG        | THF                                           | 80         | 16       | 45                     | 3 : 1                   |
| 12        | Pd(PPh <sub>3</sub> ) <sub>4</sub>     | -                | TMG        | CH <sub>2</sub> Cl <sub>2</sub>               | 80         | 16       | 45                     | 3 : 1                   |

<sup>a</sup> Reaction conditions: **3a** (0.2 mmol, 1.0 equiv), Pd-source (0.02 mmol, 10 mol%), ligand (monodentate ligand: 0.10 mmol, 50 mol% / bidentate ligand: 0.05 mmol, 25mol%), solvent (0.2 M). <sup>b</sup> Isolated yield. <sup>c</sup> No conversion.

# Structural analysis of vinylcyclopropanes

## SFC-MS analysis of enantiomeric excess

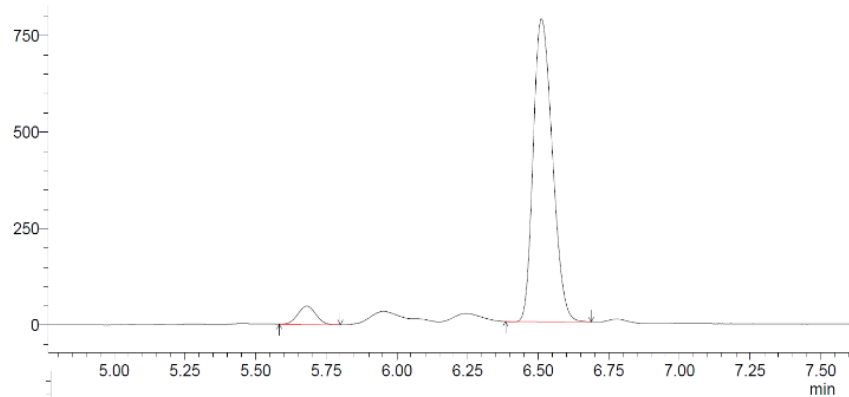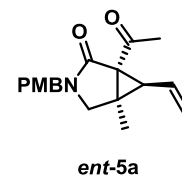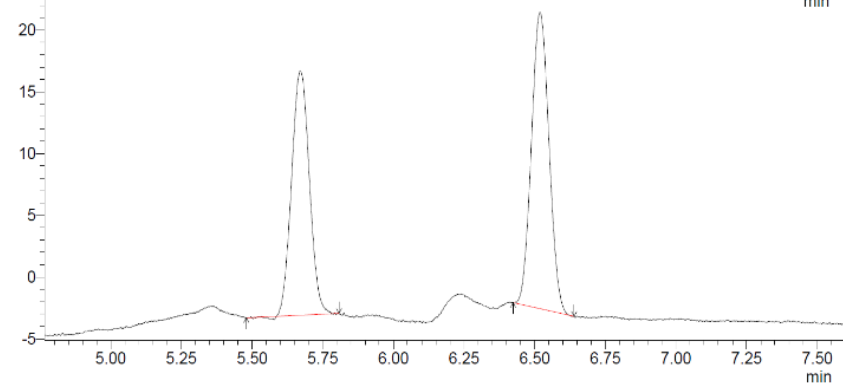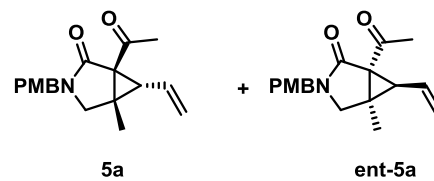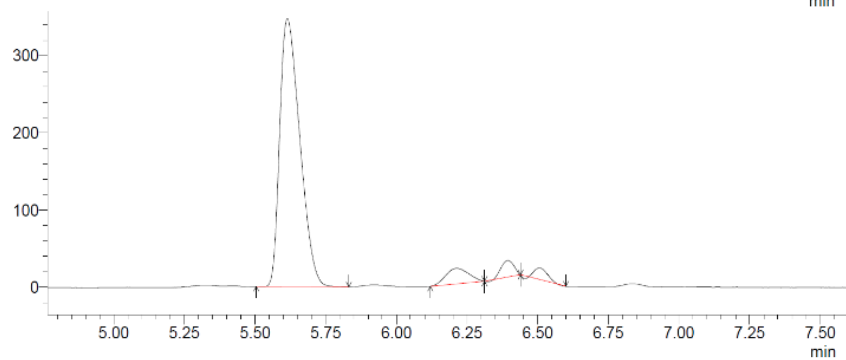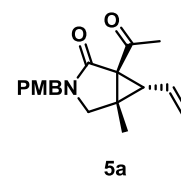

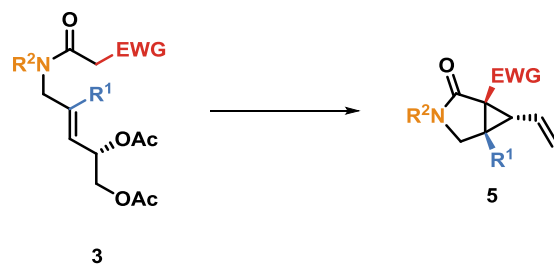

|   | R <sup>2</sup> | R <sup>1</sup> | EWG | ee 3 (%) | ee 5 (%) | es (%) |
|---|----------------|----------------|-----|----------|----------|--------|
| a | PMB            | Me             |     | 92       | 90       | 98     |
| b | PMB            | Me             |     | 87       | 89       | >99    |
| c | PMB            | Me             |     | 100      | 96       | 96     |
| d | PMB            | Me             |     | 97       | 93       | 96     |
| g | Me             | Me             |     | 95       | 89       | 94     |
| h | <i>i</i> -Pr   | Me             |     | 94       | 89       | 95     |
| i | PMB            | Et             |     | 90       | 88       | 98     |

## X-ray analysis

Crystals of (**7**) suitable for x-ray diffraction were grown by slow evaporation from ethanol solution. A fragment of a needle 0.11 x 0.06 x 0.04 mm was mounted on a kapton loop and flash-cooled in the 106K cold stream on the Agilent SuperNova diffractometer with Cu K( $\alpha$ ) microsource, mirror monochromator and Atlas CCD detector. Data were collected via  $\omega$  scans, up to 75.337° in  $\varphi$ , and were reduced and corrected for absorption with CrysAlisPro, Agilent Technologies, Version 1.171.38.41r (Rigaku OD, 2015). The structure was solved with SHELXT-2017/1 and refined with SHELXL-2017/1 and the ShelxLE graphical interface.<sup>1</sup> All other details of the crystallographic experiment and refinement can be found under CSD reference nr. 1856030, which is available for download at the Cambridge Crystallographic Data Centre.

The structure is monoclinic, space group  $P2_1$ , with two independent molecules in the asymmetric unit. Both symmetry independent molecules display a hydrogen bond with the hydrazone H as donor, and the amide oxygen as acceptor. Even though they are stereochemically identical, and very similar in conformation, there is no crystallographic symmetry between them.

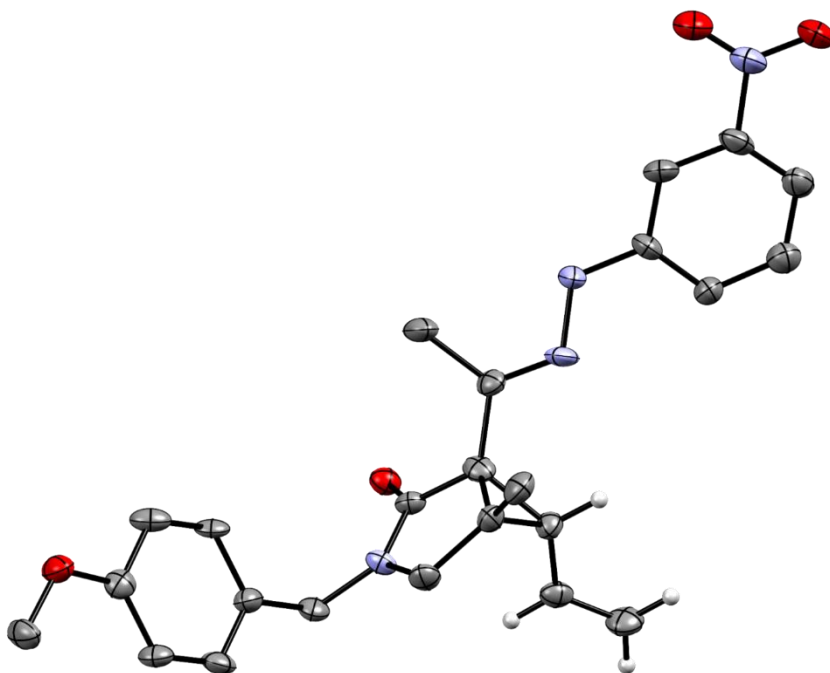



## Synthetic procedures

### Esters

#### ethyl (*S,Z*)-2-methyl-3-(1,4-dioxaspiro[4.5]decan-2-yl)acrylate (**S01**)

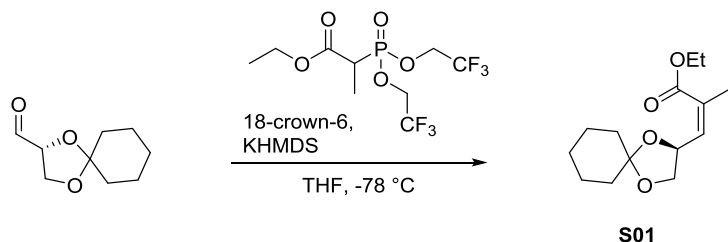

A solution of ethyl 2-[bis(2,2,2-trifluoroethoxy)phosphoryl]propanoate (1.5 g, 4.33 mmol, 1.1 equiv) and 18-crown-6 (5.2 g, 19.7 mmol, 5.0 equiv) in THF (100 mL) was cooled to  $-78\text{ }^{\circ}\text{C}$  after which a 1 M solution of KHMDS in THF (4.0 mL, 4.0 mmol, 1.0 equiv) was added dropwise. The reaction mixture was stirred for 30 min. at  $-78\text{ }^{\circ}\text{C}$  and a solution of 2,3-O-cyclohexylidene-D-glyceraldehyde (804 mg, 4.73 mmol, 1.2 equiv) in THF (5 mL) was added dropwise at  $-78\text{ }^{\circ}\text{C}$ . The reaction mixture was stirred for 1 h at  $-78\text{ }^{\circ}\text{C}$ , after which the reaction mixture was quenched by the addition of a sat. aq.  $\text{NH}_4\text{Cl}$  solution. The reaction mixture was extracted with  $\text{Et}_2\text{O}$  (3x) and the combined organic phases were dried ( $\text{Na}_2\text{SO}_4$ ), filtered and concentrated under reduced pressure. The crude material was purified by silica gel column chromatography (1%  $\rightarrow$  5%  $\text{EtOAc}/\text{cHex}$ ), providing the title compound as a colorless oil in 58% yield (590 mg, 2.32 mmol).  $R_f = 0.4$  ( $\text{EtOAc}/\text{cHex} = 1:9$ ).  $^1\text{H NMR}$  (600 MHz,  $\text{CDCl}_3$ )  $\delta$  6.07 (d,  $J = 7.0$  Hz, 1H), 5.26 (q,  $J = 7.0$  Hz, 1H), 4.29 (t,  $J = 7.4$  Hz, 1H), 4.19 (q,  $J = 7.1$  Hz, 2H), 3.59 (t,  $J = 7.5$  Hz, 1H), 1.92 (s, 3H), 1.70 – 1.53 (m, 8H), 1.46 – 1.36 (m, 2H), 1.30 (t,  $J = 7.1$  Hz, 3H).  $^{13}\text{C NMR}$  (151 MHz,  $\text{CDCl}_3$ )  $\delta$  167.17, 142.66, 129.43, 110.21, 73.77, 69.41, 60.79, 36.44, 35.15, 25.31, 24.00, 20.15, 14.37. **IR (neat)**:  $\nu_{\text{max}}$  ( $\text{cm}^{-1}$ ): 2933, 2862, 2341, 1716, 1656, 1450, 1367, 1342, 2339, 1207, 1099, 1070, 1041, 929. **HRMS (ESI)**:  $m/z$  calculated for  $\text{C}_{14}\text{H}_{22}\text{O}_4\text{Na}^+$  ( $[\text{M}+\text{Na}]^+$ ) = 277.1410, found = 277.1396.  $[\alpha]_D^{20} = +62.86$  ( $c = 1.05$ ,  $\text{CHCl}_3$ ).

**ethyl (S,E)-2-((2,2-dimethyl-1,3-dioxolan-4-yl)methylene)butanoate (S02)**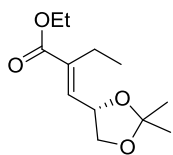

Ethyl 2-bromobutyrate (18 mL, 122 mmol, 1.2 equiv) was added to a suspension of  $\text{PPh}_3$  (26.7 g, 102 mmol, 1.0 equiv) in  $\text{H}_2\text{O}$  (100 mL). The reaction mixture was stirred at 100 °C for 16 h after which the reaction mixture was cooled to room temperature and extracted with  $\text{CH}_2\text{Cl}_2$  (3x 20 mL). The organic phases were dried ( $\text{Na}_2\text{SO}_4$ ) and concentrated under reduced pressure. The crude phosphonium bromide intermediate (18.4 g, 40.5 mmol, 1.0 equiv) was subsequently dissolved in anhydrous THF (200 mL) and cooled to 0 °C after which  $\text{KOtBu}$  (4.1 g, 36.5 mmol, 0.90 equiv) was added in portions. The reaction mixture was stirred for 1 h at 0 °C after which a solution of (*R*)-(+)-2,2-dimethyl-1,3-dioxolane-4-carboxaldehyde (5 g, 38.5 mmol, 0.95 equiv) in  $\text{CH}_2\text{Cl}_2$  (10 mL) was added dropwise. The reaction mixture was stirred overnight at room temperature. The reaction was quenched by addition of sat. aq.  $\text{NH}_4\text{Cl}$  solution (20 mL) and the reaction mixture was stirred for 10 min. at room temperature, diluted with EtOAc (50 mL) and transferred to a separation funnel. The aqueous phase was extracted with EtOAc (2 x 30 mL). The combined organics were washed with brine, dried ( $\text{Na}_2\text{SO}_4$ ) and concentrated under reduced pressure. The crude product was purified by silica gel column chromatography (2% → 10% EtOAc/cHex) which provided the title compound in 36% yield (3.28 g, 14.4 mmol).  $R_f = 0.7$  (EtOAc/cHex = 1:9).  $^1\text{H NMR}$  (600 MHz,  $\text{CDCl}_3$ )  $\delta$  6.62 (d,  $J = 8.3$  Hz, 1H), 4.85 (ddd,  $J = 8.4, 7.7, 6.2$  Hz, 1H), 4.25 – 4.17 (m, 2H), 4.14 (dd,  $J = 8.2, 6.2$  Hz, 1H), 3.63 (t,  $J = 7.9$  Hz, 1H), 2.41 – 2.28 (m, 2H), 1.45 (s, 3H), 1.41 (s, 3H), 1.30 (t,  $J = 7.1$  Hz, 3H), 1.03 (t,  $J = 7.5$  Hz, 3H).  $^{13}\text{C NMR}$  (151 MHz,  $\text{CDCl}_3$ )  $\delta$  167.12, 137.61, 137.59, 109.99, 72.60, 69.19, 60.91, 26.78, 26.01, 20.86, 14.69, 14.36. **IR (neat):**  $\nu_{\text{max}}$  ( $\text{cm}^{-1}$ ): 2983, 1712, 1369, 1305, 1271, 1232, 1213, 1141, 1114, 1056, 1029. **HRMS (ESI):**  $m/z$  calculated for  $\text{C}_{12}\text{H}_{20}\text{O}_4\text{Na}$   $[\text{M}+\text{Na}]^+ = 251.1254$ , found = 251.1254.  $[\alpha]_D^{20} = +15.7$  ( $c = 3.95$ ,  $\text{CHCl}_3$ ).

## Alcohols

### (*S,Z*)-2-methyl-3-(1,4-dioxaspiro[4.5]decan-2-yl)prop-2-en-1-ol (**S03**)

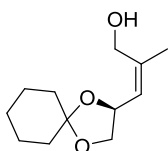

Allylic ester **S01** (590 mg, 2.32 mmol, 1.0 equiv) was dissolved in anhydrous THF (0.3 M) and the reaction mixture was cooled to 0 °C after which a solution of DIBAL-H (1.0 M in heptane, 5.1 mL, 5.1 mmol 2.2 equiv) was added dropwise. The reaction mixture was allowed to warm to room temperature and was stirred overnight. The reaction mixture was cooled to 0 °C, quenched by the dropwise addition of MeOH (20 mL) and stirred for 3 h at room temperature. The white suspension was filtered over Celite® and the residue was washed with MeOH. The filtrate was concentrated under reduced pressure after which the title compound was obtained as a colorless liquid in 97% yield (480 mg, 2.26 mmol). The product was directly used in the next reaction without purification.  $R_f = 0.3$  (EtOAc/cHex = 3:7).  $^1\text{H NMR}$  (600 MHz,  $\text{CDCl}_3$ )  $\delta$  5.34 (d,  $J = 8.1$  Hz, 1H), 4.86 (q,  $J = 7.5$  Hz, 1H), 4.17 (dd,  $J = 68.7, 13.7$  Hz, 2H), 4.06 (t,  $J = 7.0$  Hz, 1H), 3.53 (t,  $J = 8.0$  Hz, 1H), 1.84 (s, 3H), 1.67 – 1.33 (m, 10H).  $^{13}\text{C NMR}$  (151 MHz,  $\text{CDCl}_3$ )  $\delta$  141.38, 125.49, 109.94, 71.84, 69.52, 62.18, 36.54, 35.62, 25.24, 24.12, 24.05, 21.88. **IR (neat)**:  $\nu_{\text{max}}$  ( $\text{cm}^{-1}$ ): 3380, 2910, 2551, 1550, 1432, 1344, 1250, 1190, 1080, 1050, 1030, 910. **HRMS (ESI)**:  $m/z$  calculated for  $\text{C}_{12}\text{H}_{20}\text{NaO}_3$  ( $[\text{M}+\text{Na}]^+$ ) = 235.1305, found = 235.1305.

### (*S,E*)-2-((2,2-dimethyl-1,3-dioxolan-4-yl)methylene)butan-1-ol (**S04**)

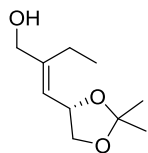

Allylic ester **S02** (3.28 g, 14.4 mmol, 1.0 equiv) was dissolved in anhydrous THF (70 mL) and the reaction mixture was cooled to 0 °C after which a solution of DIBAL-H (1.0 M in heptane, 35 mL, 35 mmol 2.4 equiv) was added dropwise. The reaction mixture was allowed to warm to room temperature and was stirred overnight. The reaction mixture was cooled to 0 °C, quenched by the dropwise addition of MeOH (100 mL) and stirred for 3 h at room temperature. The white suspension was filtered over Celite® and the residue was extracted with MeOH. The filtrate was concentrated under reduced pressure after which the title compound was obtained as a colorless liquid in 96% yield (2.56 g, 13.8 mmol). The product was directly used in the next reaction without purification.  $R_f = 0.2$  (EtOAc/cHex = 1:1).  $^1\text{H NMR}$  (600 MHz,  $\text{CDCl}_3$ )  $\delta$  5.44 (d,  $J = 8.7$  Hz, 1H), 4.83 (td,  $J = 8.4, 6.0$  Hz, 1H), 4.10 – 4.04 (m, 3H), 3.55 (t,  $J = 8.1$  Hz, 1H), 2.26 – 2.16 (m, 1H), 2.16 – 2.08 (m, 1H), 1.42 (s, 3H), 1.41 (s, 3H), 1.03 (t,  $J = 7.6$  Hz, 3H).  $^{13}\text{C NMR}$  (151 MHz,  $\text{CDCl}_3$ )  $\delta$  146.98, 121.92, 109.22, 72.31, 69.70, 65.83, 26.92, 26.16, 21.73, 14.19. **HRMS (ESI)**:  $m/z$  calculated for  $\text{C}_{10}\text{H}_{18}\text{O}_3\text{Na}$   $[\text{M}+\text{Na}]^+ = 209.1148$ , found = 209.1155.  $[\alpha]_D^{20} = +16.00$  ( $c = 0.50$ ,  $\text{CHCl}_3$ ).

## Bromides

### (*S,E*)-2-(3-bromo-2-methylprop-1-en-1-yl)-1,4-dioxaspiro[4.5]decane (S05)

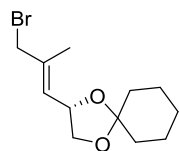

Allylic alcohol **6** (3.85 g, 18.2 mmol, 1.0 equiv) – as prepared according to literature procedure reported by Kiyotsuka *et al.*<sup>2</sup> – was used in general procedure A. After TLC analysis indicated complete conversion, the reaction mixture was concentrated and the crude product was purified by silica gel column chromatography (1% EtOAc/cHex), providing the pure product as a colorless liquid in 94% yield (4.7 g, 17.2 mmol). The product appears relatively unstable and is often used directly without purification in the next steps.  $R_f = 0.2$  (EtOAc/cHex = 3:97).  $^1\text{H NMR}$  (500 MHz,  $\text{CDCl}_3$ )  $\delta$  5.61 (d,  $J = 8.3$  Hz, 1H), 4.75 (td,  $J = 8.0, 6.1$  Hz, 1H), 4.09 (dd,  $J = 8.1, 6.1$  Hz, 1H), 3.96 – 3.91 (m, 2H), 3.54 (t,  $J = 7.9$  Hz, 1H), 1.85 (d,  $J = 1.3$  Hz, 3H), 1.66 – 1.59 (m, 10H).  $^{13}\text{C NMR}$  (126 MHz,  $\text{CDCl}_3$ )  $\delta$  137.13, 128.69, 110.30, 72.69, 68.99, 40.08, 36.65, 35.77, 25.44, 24.29, 24.22, 15.66. **IR (neat):**  $\nu_{\text{max}}$  ( $\text{cm}^{-1}$ ): 2933, 2858, 2358, 2345, 2327, 1448, 1382, 1365, 1330, 1280, 1249, 1230, 1209, 1163, 1103, 1068, 1041, 1004, 929. **HRMS (ESI):** calculated for  $\text{C}_{12}\text{H}_{19}\text{BrNaO}_2$  ( $[\text{M}+\text{Na}]^+$ ) = 297.0461, found = 297.0462.  $[\alpha]_D^{20} = +46.0$  ( $c = 1.00$ ,  $\text{CHCl}_3$ ).

### (*S,E*)-4-(2-(bromomethyl)but-1-en-1-yl)-2,2-dimethyl-1,3-dioxolane (S06)

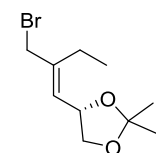

Allylic alcohol **S04** (2.56 g, 13.8 mmol) was used in general procedure A. After TLC analysis indicated complete conversion, the reaction mixture was concentrated and the crude product was purified by silica gel column chromatography (1% EtOAc/cHex), providing the pure product as a colorless liquid in 91% yield (3.84 g, 12.6 mmol).  $R_f = 0.75$  (EtOAc/cHex = 1:9).  $^1\text{H NMR}$  (600 MHz,  $\text{CDCl}_3$ )  $\delta$  5.57 (d,  $J = 8.5$  Hz, 1H), 4.83 – 4.71 (m, 1H), 4.08 (dd,  $J = 8.2, 6.1$  Hz, 1H), 3.98 (q,  $J = 10.3$  Hz, 2H), 3.54 (t,  $J = 8.0$  Hz, 1H), 2.37 – 2.22 (m, 2H), 1.42 (s, 3H), 1.40 (s, 3H), 1.06 (t,  $J = 7.6$  Hz, 3H).  $^{13}\text{C NMR}$  (151 MHz,  $\text{CDCl}_3$ )  $\delta$  142.86, 128.08, 109.49, 72.47, 69.35, 37.19, 26.88, 26.05, 22.15, 13.60. **IR (neat):**  $\nu_{\text{max}}$  ( $\text{cm}^{-1}$ ): 1712, 1436, 1380, 1311, 1245, 1157, 1118, 1085, 1070, 1043, 1026, 1012.

## Amines

### (*S,E*)-*N*-(4-methoxybenzyl)-2-methyl-3-(1,4-dioxaspiro[4.5]decan-2-yl)prop-2-en-1-amine (S07)

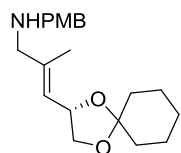

Allylic bromide **S05** (4.7 g, 17.2 mmol, 1.0 equiv) was used in general procedure B, providing the pure title compound as a yellow oil in 91% yield (5.18 g, 15.6 mmol).  $R_F = 0.3$  (EtOAc/cHex = 9:1). The NMR spectra contain double alkylated amine as a minor impurity (7.4 mol%).  $^1\text{H NMR}$  (500 MHz,  $\text{CDCl}_3$ )  $\delta$  7.23 (d,  $J = 8.6$  Hz, 2H), 6.86 (d,  $J = 8.7$  Hz, 2H), 5.43 – 5.37 (m, 1H), 4.83 (td,  $J = 8.3, 6.0$  Hz, 1H), 4.06 (dd,  $J = 8.0, 6.0$  Hz, 1H), 3.80 (s, 3H), 3.68 (s, 2H), 3.51 (t,  $J = 8.1$  Hz, 1H), 3.17 (s, 2H), 1.75 (d,  $J = 1.2$  Hz, 3H), 1.67 – 1.53 (m, 10H).  $^{13}\text{C NMR}$  (126 MHz,  $\text{CDCl}_3$ )  $\delta$  158.95, 139.94, 132.63, 129.68, 123.63, 114.09, 109.86, 72.74, 69.38, 56.60, 55.61, 52.85, 36.73, 35.94, 25.49, 24.31, 24.25, 15.87. IR (neat):  $\nu_{\text{max}}$  ( $\text{cm}^{-1}$ ): 2935, 2862, 2852, 2837, 1610, 1512, 1463, 1448, 1363, 1299, 1278, 1245, 1172, 1163, 1105, 1070, 1035, 931, 908, 846, 829. HRMS (ESI): calculated for  $\text{C}_{20}\text{H}_{30}\text{NO}_3$  ( $[\text{M}+\text{H}]^+$ ) = 332.2220, found = 332.2227.  $[\alpha]_D^{20} = +4.85$  ( $c = 1.65$ ,  $\text{CHCl}_3$ ).

### (*S,E*)-*N*-methyl-*N*-(2-methyl-3-(1,4-dioxaspiro[4.5]decan-2-yl)allyl)-4-nitrobenzenesulfonamide (S08)

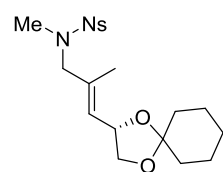

A solution of *N*-methyl-4-nitrobenzenesulfonamide (393 mg, 1.82 mmol, 1.0 equiv) in anhydrous THF (5 mL) was cooled to 0 °C. NaH (110 mg, 60 wt%, 2.73 mmol, 1.5 equiv) was added portionwise, after which the reaction mixture was allowed to warm to room temperature. After 30 minutes, the reaction mixture was cooled to 0 °C and a solution of allylic bromide **S05** (500 mg, 1.82 mmol, 1.0 equiv) in anhydrous THF (2 mL) was added dropwise. The reaction mixture was stirred at room temperature for 6 h, after which TLC analysis indicated complete conversion. The reaction mixture was diluted with EtOAc and washed with sat. aq.  $\text{NH}_4\text{Cl}$ , sat. aq.  $\text{NaHCO}_3$  and brine. The organic phase was dried ( $\text{Na}_2\text{SO}_4$ ), filtered and concentrated under reduced pressure. The crude product was directly used in the next reaction.  $R_F = 0.4$  (EtOAc/cHex = 2:3).  $^1\text{H NMR}$  (300 MHz,  $\text{CDCl}_3$ )  $\delta$  8.44 – 8.29 (m, 2H), 8.10 – 7.89 (m, 2H), 5.61 (dd,  $J = 8.5, 1.5$  Hz, 1H), 4.87 – 4.65 (m, 2H), 4.12 – 4.03 (m, 1H), 3.93 (s, 2H), 3.59 – 3.49 (m, 1H), 2.73 (s, 1H), 2.72 (s, 2H), 1.84 (s, 1H), 1.83 (s, 2H), 1.72 – 1.50 (m, 10H). Some rotameric signals were observed.

### (*S,E*)-*N*,2-dimethyl-3-(1,4-dioxaspiro[4.5]decan-2-yl)prop-2-en-1-amine (S09)

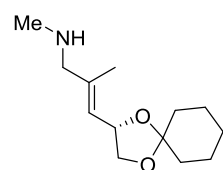

To a solution of crude **S08** (theor. 1.82 mmol, 1.0 equiv) in DMF (5 mL) was added  $\text{Cs}_2\text{CO}_3$  (2.37 g, 7.28 mmol, 4.0 equiv) and thiophenol (0.4 mL, 3.7 mmol, 2.0 equiv). The reaction mixture was stirred overnight at room temperature and subsequently filtered and concentrated under reduced pressure. The crude product was used directly in the next reaction.  $R_F = 0.1$  (EtOAc/cHex = 2:3).

**(S,E)-N-isopropyl-2-methyl-3-(1,4-dioxaspiro[4.5]decan-2-yl)prop-2-en-1-amine (S10)**

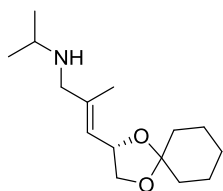

To a suspension of isopropylamine (1.3 mL, 14.6 mmol, 2.0 equiv) and cesium carbonate (4.8 g, 14.6 mmol, 2.0 equiv) in dry DMF (70 mL) was added a solution of allylic bromide **S05** (2 g, 7.3 mmol, 1.0 equiv) in dry DMF (5 mL). The reaction mixture was heated to 65 °C and was stirred for 3 h. The reaction mixture was diluted with EtOAc (100 mL) and washed with sat. aq. NaHCO<sub>3</sub> (2×), dried (Na<sub>2</sub>SO<sub>4</sub>), filtered and concentrated under reduced pressure affording the crude title compound in 54% yield (1.00 g, 3.95 mmol). The crude product was used directly in the next reaction. **R<sub>f</sub>** = 0.2 (EtOAc/cHex = 2:3). **<sup>1</sup>H NMR** (300 MHz, CDCl<sub>3</sub>) δ 5.38 (d, *J* = 8.5, 1.5 Hz, 1H), 4.82 (q, *J* = 8.3, 6.0 Hz, 1H), 4.05 (dd, *J* = 8.0, 5.9 Hz, 1H), 3.51 (t, *J* = 8.1 Hz, 1H), 3.17 (s, 2H), 2.85 – 2.68 (m, 1H), 1.75 (s, 3H), 1.61 (s, 11H), 1.06 (d, *J* = 6.2 Hz, 6H). **IR (neat)**: ν<sub>max</sub> (cm<sup>-1</sup>): 2931, 2862, 1672, 1448, 1363, 1332, 1278, 1249, 1230, 1141, 1163, 1099, 1068, 1039, 1020. **HRMS (ESI)**: *m/z* calculated for C<sub>15</sub>H<sub>28</sub>NO<sub>2</sub><sup>+</sup> [M+H]<sup>+</sup> 254.2108, found: 254.2124. [α]<sub>D</sub><sup>20</sup> = + 7.16 (c = 1.68, CHCl<sub>3</sub>).

**(S,E)-2-((2,2-dimethyl-1,3-dioxolan-4-yl)methylene)-N-(4-methoxybenzyl)butan-1-amine (S11)**

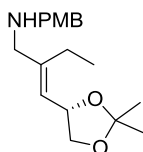

To a suspension of 4-methoxybenzylamine (3.5 mL, 25.2 mmol, 2.0 equiv) and cesium carbonate (8.2 g, 25.2 mmol, 2.0 equiv) in anhydrous DMF (80 mL) was added a solution of allylic bromide **S06** (3.84 g, 12.6 mmol, 1.0 equiv) in dry DMF (10 mL). The reaction mixture was heated to 65 °C and was stirred for 3 h. The reaction mixture was cooled to room temperature, diluted with EtOAc (100 mL) and washed with sat. aq. NaHCO<sub>3</sub> (5×), dried (Na<sub>2</sub>SO<sub>4</sub>), filtered and concentrated under reduced pressure affording the crude title compound in 87% yield (3.31 g, 10.95 mmol). The crude product was used directly in the next reaction. **R<sub>f</sub>** = 0.50 (EtOAc/cHex = 3:7). **<sup>1</sup>H NMR** (600 MHz, CDCl<sub>3</sub>) δ 7.24 (dd, *J* = 8.7, 7.1 Hz, 2H), 6.96 – 6.83 (m, 2H), 5.37 (dd, *J* = 8.7, 1.4 Hz, 1H), 4.84 (td, *J* = 8.4, 5.9 Hz, 1H), 4.05 (dd, *J* = 8.0, 6.0 Hz, 1H), 3.81 – 3.77 (m, 3H), 3.73 – 3.67 (m, 2H), 3.53 (t, *J* = 8.1 Hz, 1H), 3.21 (s, 2H), 2.24 – 2.10 (m, 2H), 1.43 (s, 3H), 1.40 (s, 3H), 1.01 (t, *J* = 7.6 Hz, 3H). **<sup>13</sup>C NMR** (151 MHz, CDCl<sub>3</sub>) δ 132.66, 129.92, 129.39, 129.28, 122.38, 114.08, 113.88, 109.06, 72.63, 69.79, 64.53, 55.40, 53.94, 52.82, 26.98, 26.20, 22.87, 14.24. **IR (neat)**: ν<sub>max</sub> (cm<sup>-1</sup>): 2952, 1610, 1510, 1454, 1442, 1369, 1299, 1244, 1211, 1174, 1155, 1054, 1033. **HRMS (ESI)**: *m/z* calculated for C<sub>18</sub>H<sub>28</sub>NO<sub>3</sub> [M+H]<sup>+</sup> = 306.2064, found = 306.2074. [α]<sub>D</sub><sup>20</sup> = + 7.67 (c = 4.95, CHCl<sub>3</sub>).

## Acetals

### (*S,E*)-*N*-(4-methoxybenzyl)-*N*-(2-methyl-3-(1,4-dioxaspiro[4.5]decan-2-yl)allyl)-3-oxobutanamide (**S12**)

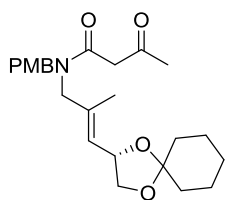

Allylic amine **S07** (5.18 g, 15.6 mmol, 1.0 equiv) was used in general procedure C using ethyl acetoacetate. The crude product was purified by silica gel column chromatography (30% → 45% EtOAc/cHex) providing the title compound as yellow oil in 89% yield (5.78 g, 13.9 mmol).  $R_f = 0.7$  (EtOAc/cHex = 4:1).  $^1\text{H NMR}$  (500 MHz,  $\text{CDCl}_3$ )  $\delta$  7.23 – 6.99 (m, 2H), 6.96 – 6.77 (m, 2H), 5.25 (d,  $J = 8.1$  Hz, 1H), 4.81 (td,  $J = 8.0, 6.0$  Hz, 1H), 4.64 – 4.24 (m, 2H), 4.09 – 4.03 (m, 1H), 3.81 – 3.77 (m, 3H), 3.67 (s, 1H), 3.56 (m, 1H), 3.47 (m, 1H), 2.27 (m, 2H), 1.68 – 1.30 (m, 10H).  $^{13}\text{C NMR}$  (126 MHz,  $\text{CDCl}_3$ )  $\delta$  159.10, 134.99, 129.57, 128.93, 127.64, 125.95, 124.20, 114.47, 114.09, 110.00, 109.81, 72.32, 72.11, 69.03, 55.45, 55.39, 53.50, 51.56, 50.16, 49.74, 48.08, 36.47, 35.64, 25.21, 24.00, 15.09, 14.33. Multiple rotameric signals were observed. **IR (neat)**:  $\nu_{\text{max}}$  ( $\text{cm}^{-1}$ ): 2931, 2860, 1718, 1633, 1612, 1585, 1512, 1487, 1446, 1419, 1384, 1361, 1330, 1301, 1278, 1244, 1207, 1161, 1099, 1070, 1031, 927, 910, 846, 825, 754, 607, 541. **HRMS (ESI)**: calculated for  $\text{C}_{24}\text{H}_{33}\text{NO}_5\text{Na}$  ( $[\text{M}+\text{Na}]^+$ ) = 438.2251, found = 438.2247.  $[\alpha]_D^{20} = +9.14$  ( $c = 1.75$ ,  $\text{CHCl}_3$ ).

### (*S,E*)-*N*-(4-methoxybenzyl)-*N*-(2-methyl-3-(1,4-dioxaspiro[4.5]decan-2-yl)allyl)-2-

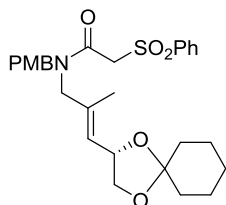

#### (phenylsulfonyl)acetamide (**S13**)

Prepared from allylic amine **S07** (506 mg, 1.50 mmol, 1.0 equiv) and (phenylsulfonyl)acetic acid (300 mg, 1.95 mmol, 1.3 equiv), according to general procedure D. Purification of the crude material by silica gel column chromatography (30% EtOAc/cHex) afforded the title compound as a yellow oil in 86% yield (658 mg, 1.28 mmol).  $R_f = 0.55$  (EtOAc/cHex = 1:1).  $^1\text{H NMR}$  (500 MHz,  $\text{CDCl}_3$ )  $\delta$  7.91 (dd,  $J = 21.6, 7.8$  Hz, 2H), 7.72 – 7.51 (m, 3H), 7.19 – 7.01 (m, 2H), 6.92 – 6.78 (m, 2H), 5.30 (dd,  $J = 97.8, 8.3$  Hz, 1H), 4.82 (dq,  $J = 15.3, 7.7, 7.2$  Hz, 1H), 4.72 – 4.60 (m, 1H), 4.46 (dd,  $J = 54.3, 14.3$  Hz, 1H), 4.25 – 4.15 (m, 2H), 4.13 – 4.00 (m, 1H), 3.99 – 3.86 (m, 2H), 3.84 – 3.75 (m, 3H), 3.48 (dt,  $J = 50.6, 8.0$  Hz, 1H), 1.73 – 1.66 (m, 3H), 1.66 – 1.32 (m, 10H).  $^{13}\text{C NMR}$  (126 MHz,  $\text{CDCl}_3$ )  $\delta$  162.25, 162.12, 159.38, 159.21, 138.89, 138.77, 135.20, 134.81, 134.35, 129.51, 129.26, 129.24, 128.64, 128.63, 128.47, 127.47, 127.44, 124.12, 114.62, 114.12, 110.01, 109.89, 72.33, 72.03, 69.08, 68.98, 60.02, 59.93, 55.45, 55.40, 53.70, 52.28, 50.22, 48.82, 36.43, 35.66, 35.58, 25.23, 25.18, 24.08, 24.02, 23.96, 15.27, 14.86. Multiple rotameric signals were observed. **IR (neat)**:  $\nu_{\text{max}}$  ( $\text{cm}^{-1}$ ): 2931, 2858, 1649, 1612, 1512, 1446, 1363, 1321, 1247, 1155, 1101, 1033, 927. **HRMS (ESI)**:  $m/z$  calculated for  $\text{C}_{28}\text{H}_{35}\text{NO}_6\text{SNa}^+$   $[\text{M}+\text{Na}]^+$  536.2077, found: 536.2073.  $[\alpha]_D^{20} = +13.15$  ( $c = 0.76$ ,  $\text{CHCl}_3$ ).

**(*S,E*)-*N*-(4-methoxybenzyl)-*N*-(2-methyl-3-(1,4-dioxaspiro[4.5]decan-2-yl)allyl)-3-oxo-3-phenylpropanamide (S14)**

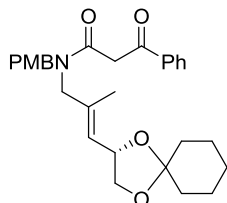

Prepared from allylic amine **S07** (990 mg, 3.0 mmol, 1.0 equiv) and ethyl benzoylacetate (0.6 mL, 3.6 mmol, 1.2 equiv), according to general procedure C. Purification of the crude material by silica gel column chromatography (30% EtOAc/cHex) afforded the title compound as a yellow oil in 75% yield (1.08 g, 2.26 mmol).  $R_f = 0.80$  (EtOAc/cHex = 1:1).  $^1\text{H NMR}$  (500 MHz,  $\text{CDCl}_3$ )  $\delta$  15.25 (d,  $J = 9.0$  Hz, 0.3H), 7.98 (dd,  $J = 23.2, 7.8$  Hz, 1H), 7.81 – 7.69 (m, 1H), 7.59 (q,  $J = 8.0$  Hz, 1H), 7.52 – 7.33 (m, 2H), 7.21 (dd,  $J = 8.3, 5.9$  Hz, 1H), 7.11 (dd,  $J = 28.4, 8.2$  Hz, 1H), 6.87 (dd,  $J = 20.3, 8.2$  Hz, 2H), 5.87 (s, 0.2H), 5.72 (s, 0.2H), 5.36 (d,  $J = 8.5$  Hz, 0H), 5.29 (d,  $J = 8.0$  Hz, 1H), 4.82 (p,  $J = 8.0$  Hz, 1H), 4.73 – 4.32 (m, 2H), 4.20 – 3.88 (m, 3H), 3.84 – 3.78 (m, 3H), 3.75 (s, 1H), 3.52 – 3.41 (m, 1H), 1.72 – 1.69 (m, 3H), 1.61 (q,  $J = 14.0, 11.9$  Hz, 10H).  $^{13}\text{C NMR}$  (126 MHz,  $\text{CDCl}_3$ )  $\delta$  194.09, 194.01, 172.73, 172.66, 172.05, 171.84, 167.86, 167.65, 159.16, 159.10, 159.01, 158.94, 136.17, 136.08, 136.02, 135.93, 135.19, 134.91, 134.79, 133.76, 130.77, 130.74, 129.53, 129.40, 128.78, 128.75, 128.69, 128.61, 128.45, 127.87, 127.62, 125.99, 125.98, 125.73, 125.37, 124.91, 124.07, 114.36, 114.28, 113.97, 109.88, 109.67, 84.99, 84.80, 72.27, 72.22, 72.03, 68.97, 68.90, 55.35, 55.28, 53.53, 53.24, 51.52, 51.13, 49.74, 49.12, 48.01, 47.74, 45.97, 45.76, 36.37, 36.29, 35.57, 35.51, 25.15, 25.11, 23.98, 23.97, 23.90, 15.02, 14.94, 14.89, 14.64. Multiple rotameric and tautomeric signals were observed. **IR (neat)**:  $\nu_{\text{max}}$  ( $\text{cm}^{-1}$ ): 2931, 2858, 2364, 2331, 1623, 1614, 1573, 1512, 1479, 1446, 1375, 1247, 1217, 1174, 1101, 1033, 927. **HRMS (ESI)**:  $m/z$  calculated for  $\text{C}_{29}\text{H}_{35}\text{NO}_5\text{Na}^+$  [ $\text{M}+\text{Na}$ ] $^+$  500.2407, found: 500.2395.  $[\alpha]_D^{20} = +10.64$  ( $c = 0.47$ ,  $\text{CHCl}_3$ ).

**ethyl (*S,E*)-3-((4-methoxybenzyl)(2-methyl-3-(1,4-dioxaspiro[4.5]decan-2-yl)allyl)amino)-3-oxopropanoate (S15)**

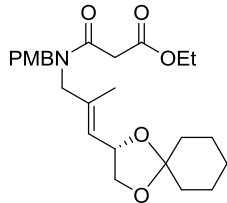

To a solution of allylic amine **S07** (500 mg, 1.50 mmol, 1.0 equiv) in anhydrous  $\text{CH}_2\text{Cl}_2$  (15 mL) was added  $\text{Et}_3\text{N}$  (313  $\mu\text{L}$ , 2.25 mmol, 1.5 equiv) and 4-dimethylaminopyridine (18 mg, 0.15 mmol, 0.1 equiv). The reaction mixture was cooled to  $0^\circ\text{C}$  and ethyl malonyl chloride (230  $\mu\text{L}$ , 1.80 mmol, 1.2 equiv) was added, after which the reaction mixture was stirred overnight at room temperature. TLC analysis indicated complete conversion and the reaction mixture was concentrated to  $\pm 5$  mL, diluted with EtOAc (20 mL) and washed with sat. aq.  $\text{NH}_4\text{Cl}$  (3x) and brine. The organic layer was dried ( $\text{Na}_2\text{SO}_4$ ), filtered and concentrated under reduced pressure. The crude product was purified by silica gel column chromatography (30% EtOAc/cHex) providing the title compound as a yellow oil in 97% yield (646 mg, 1.45 mmol).  $R_f = 0.75$  (EtOAc/cHex = 1:1).  $^1\text{H NMR}$  (500 MHz,  $\text{CDCl}_3$ )  $\delta$  7.11 (dd,  $J = 58.4, 8.2$  Hz, 2H), 6.84 (dd,  $J = 22.1, 8.2$  Hz, 2H), 5.29 – 5.21 (m, 1H), 4.80 (q,  $J = 7.6$  Hz, 1H), 4.48 (dd,  $J = 101.5, 14.4$  Hz, 1H), 4.45 – 4.22 (m, 1H), 4.18 (p,  $J = 6.9$  Hz, 2H), 4.09 – 3.85 (m, 2H), 3.79 (s, 1H), 3.77 (s, 2H), 3.68 (s, 1H), 3.52 – 3.40 (m, 3H), 1.71 – 1.62 (m, 3H), 1.62 – 1.33 (m, 10H), 1.26 (t,  $J = 7.2$  Hz, 3H).  $^{13}\text{C NMR}$  (126 MHz,  $\text{CDCl}_3$ )  $\delta$  167.69, 166.95, 166.78, 159.27, 159.05, 135.82, 134.79, 129.54, 128.89, 127.67, 125.88, 124.41, 114.43, 114.00, 109.97, 109.75, 72.30, 72.05, 69.01, 68.95, 61.64, 55.33, 53.51, 51.48, 49.73, 47.95, 41.44, 41.26, 36.41, 36.40, 35.60, 35.56, 25.19, 25.17, 23.96, 23.95, 15.03, 14.70, 14.20, 14.13. **IR (neat)**:  $\nu_{\text{max}}$  ( $\text{cm}^{-1}$ ): 2931, 1733, 1647, 1512, 1446, 1245, 1161, 1099, 1031, 927. Rotameric signals were observed. **HRMS (ESI)**:  $m/z$  calculated for  $\text{C}_{25}\text{H}_{35}\text{NO}_6\text{Na}^+$  [ $\text{M}+\text{Na}$ ] $^+$  468.2356, found: 468.2356.  $[\alpha]_D^{20} = +8.00$  ( $c = 1.00$ ,  $\text{CHCl}_3$ ).



**(S,E)-2-cyano-N-(4-methoxybenzyl)-N-(2-methyl-3-(1,4-dioxaspiro[4.5]decan-2-yl)allyl)acetamide (S16)**

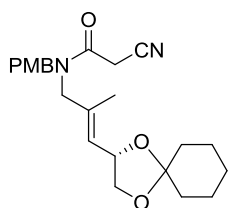

Prepared from allylic amine **S07** (662 mg, 2.0 mmol, 1.0 equiv) and cyanoacetic acid (221 mg, 2.6 mmol, 1.3 equiv), according to general procedure D. Purification of the crude material by silica gel column chromatography (35% EtOAc/cHex) afforded the title compound as a yellow oil in 90% yield (713 mg, 1.79 mmol).  $R_f = 0.60$  (EtOAc/cHex = 1:1).  $^1\text{H NMR}$  (500 MHz,  $\text{CDCl}_3$ )  $\delta$  7.01 (dd,  $J = 162.6, 8.2$  Hz, 2H), 6.98 (dd,  $J = 73.5, 8.1$  Hz, 2H), 5.25 (d,  $J = 8.3$  Hz, 1H), 4.80 (q,  $J = 7.5$  Hz, 1H), 4.63 – 4.29 (m, 2H), 4.09 – 3.96 (m, 2H), 3.80 (s, 1H), 3.79 (s, 2H), 3.70 (s, 1H), 3.52 – 3.45 (m,

3H), 1.74 – 1.64 (m, 3H), 1.63 – 1.25 (m, 10H).  $^{13}\text{C NMR}$  (126 MHz,  $\text{CDCl}_3$ )  $\delta$  162.51, 162.48, 159.51, 159.35, 135.15, 134.09, 129.98, 128.17, 127.39, 126.71, 126.63, 124.63, 114.76, 114.18, 114.04, 110.14, 109.93, 72.17, 71.90, 68.96, 68.90, 55.49, 55.41, 53.48, 52.74, 49.79, 49.08, 36.42, 36.40, 35.58, 35.54, 25.43, 25.19, 25.17, 25.14, 24.05, 24.03, 23.97, 15.16, 14.89. Multiple rotameric signals were observed. **IR (neat):**  $\nu_{\text{max}}$  ( $\text{cm}^{-1}$ ): 2933, 1658, 1512, 1446, 1247, 1176, 1163, 1107, 1033, 927. **HRMS (ESI):**  $m/z$  calculated for  $\text{C}_{23}\text{H}_{30}\text{N}_2\text{O}_4\text{Na}^+$   $[\text{M}+\text{Na}]^+$  421.2098, found: 421.2096.  $[\alpha]_D^{20} = + 4.22$  ( $c = 0.71$ ,  $\text{CHCl}_3$ ).

**(S,E)-4,4,4-trifluoro-N-(4-methoxybenzyl)-N-(2-methyl-3-(1,4-dioxaspiro[4.5]decan-2-yl)allyl)-3-oxobutanamide (S17)**

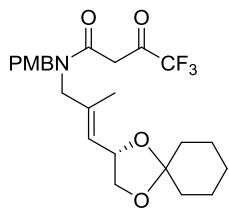

Prepared from allylic amine **S07** (990 mg, 3.0 mmol, 1.0 equiv) and methyl 4,4,4-trifluoroacetoacetate (460  $\mu\text{L}$ , 3.6 mmol, 1.2 equiv), according to Procedure C. Purification of the crude material by silica gel column chromatography (20% EtOAc/cHex) afforded the title compound as a yellow oil in 95% yield (1.34 g, 2.86 mmol).  $R_f = 0.30$  (EtOAc/cHex = 1:4).  $^1\text{H NMR}$  (600 MHz,  $\text{CDCl}_3$ )  $\delta$  15.21 (s, 0.2H), 7.17 (dd,  $J = 11.5, 8.3$  Hz, 1H), 7.11 – 7.03 (m, 1H), 6.92 – 6.84 (m, 2H), 5.91 (s,

0.2H), 5.83 (s, 0.2H), 5.66 – 5.60 (m, 0.4H), 5.50 (s, 0.2H), 5.32 – 5.25 (m, 1H), 4.81 (q,  $J = 7.9$  Hz, 1H), 4.66 (dd,  $J = 47.0, 14.6$  Hz, 0.5H), 4.51 – 4.33 (m, 1.2H), 4.09 – 4.04 (m, 1H), 4.00 – 3.91 (m, 0.4H), 3.81 (s, 1H), 3.80 (s, 2H), 3.74 (d,  $J = 7.1$  Hz, 1H), 3.52 – 3.46 (m, 1H), 2.83 (q,  $J = 15.1$  Hz, 0.4H), 2.72 (s, 0.4H), 1.70 – 1.63 (m, 3H), 1.63 – 1.51 (m, 10H).  $^{13}\text{C NMR}$  (126 MHz,  $\text{CDCl}_3$ )  $\delta$  171.51, 171.27, 171.22, 159.52, 159.50, 159.40, 159.34, 134.99, 134.84, 134.11, 134.08, 129.83, 129.62, 128.22, 128.16, 128.02, 127.81, 127.04, 126.55, 126.24, 125.76, 124.89, 123.64, 121.37, 120.02, 117.78, 114.61, 114.57, 114.25, 110.10, 109.96, 72.25, 72.22, 72.03, 69.03, 69.00, 68.94, 68.88, 55.46, 55.41, 53.26, 53.18, 51.79, 51.37, 49.85, 49.24, 48.46, 48.06, 36.48, 36.42, 35.62, 35.56, 33.51, 33.34, 25.22, 24.09, 24.00, 23.99, 15.07, 15.01, 14.83. Multiple rotameric and tautomeric signals were observed. **IR (neat):**  $\nu_{\text{max}}$  ( $\text{cm}^{-1}$ ): 2933, 1612, 1512, 1448, 1282, 1247, 1174, 1099, 1031, 925, 908. **HRMS (ESI):**  $m/z$  calculated for  $\text{C}_{24}\text{H}_{30}\text{NO}_5\text{F}_3\text{Na}^+$   $[\text{M}+\text{Na}]^+$  492.1968, found: 492.1964.  $[\alpha]_D^{20} = + 14.5$  ( $c = 1.93$ ,  $\text{CHCl}_3$ ).

**(S,E)-N-methyl-N-(2-methyl-3-(1,4-dioxaspiro[4.5]decan-2-yl)allyl)-3-oxobutanamide (S18)**

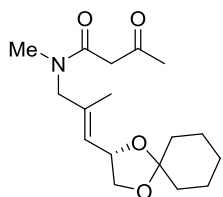

Crude allylic amine **S09** (theor. 1.82 mmol, 1.0 equiv) was used in general procedure C using ethyl acetoacetate. The crude product was purified by silica gel column chromatography (50% → 80% EtOAc/cHex) providing the title compound as a yellow oil in 20% yield (115 mg, 0.37 mmol) over 3 steps.  $R_f = 0.15$  (EtOAc/cHex = 1:1).  $^1\text{H NMR}$  (500 MHz,  $\text{CDCl}_3$ )  $\delta$  14.70 (d,  $J = 64.2$  Hz, 0.2H), 5.35 – 5.22 (m, 1H), 4.80 (q,  $J = 7.4$  Hz, 1H), 4.06 (dd,  $J = 8.1, 6.0$  Hz, 1H), 3.97 (dd,  $J = 48.0, 14.4$  Hz, 1H), 3.78 (s, 1H), 3.59 (s, 1H), 3.53 – 3.44 (m, 2H), 2.91 (s, 1H), 2.86 (s, 2H), 2.27 (d,  $J = 4.5$  Hz, 3H), 1.68 – 1.64 (m, 3H), 1.64 – 1.17 (m, 10H).  $^{13}\text{C NMR}$  (126 MHz,  $\text{CDCl}_3$ )  $\delta$  202.60 ( $\text{C}_q$ ), 202.35 ( $\text{C}_q$ ), 167.18 ( $\text{C}_q$ ), 166.90 ( $\text{C}_q$ ), 135.96 ( $\text{C}_q$ ), 135.08 ( $\text{C}_q$ ), 125.90 (CH), 124.45 (CH), 110.02 ( $\text{C}_q$ ), 109.83 ( $\text{C}_q$ ), 72.34 (CH), 72.09 (CH), 69.08 (CH<sub>2</sub>), 69.02 (CH<sub>2</sub>), 57.05 (CH<sub>2</sub>), 54.13 (CH<sub>2</sub>), 36.46 (CH<sub>2</sub>), 35.61 (CH<sub>2</sub>), 35.09 (CH<sub>3</sub>), 34.13 (CH<sub>3</sub>), 30.41 (CH<sub>3</sub>), 25.23 (CH<sub>2</sub>), 25.20 (CH<sub>2</sub>), 24.08 (CH<sub>2</sub>), 24.05 (CH<sub>2</sub>), 23.99 (CH<sub>2</sub>), 14.91 (CH<sub>3</sub>), 14.58 (CH<sub>3</sub>). The NMR spectra contain 18 mol% of enol tautomer and multiple rotameric signals. **IR (neat)**:  $\nu_{\text{max}}$  ( $\text{cm}^{-1}$ ): 2941, 2925, 2858, 1720, 1639, 1631, 1575, 1514, 1475, 1440, 1334, 1163, 1095, 1024, 927. **HRMS (ESI)**: calculated for  $\text{C}_{17}\text{H}_{27}\text{NO}_4\text{Na}$  ( $[\text{M}+\text{Na}]^+$ ) = 332.1832, found = 332.1823.  $[\alpha]_D^{20} = +7.8$  ( $c = 1.28$ ,  $\text{CHCl}_3$ ).

**(S,E)-N-isopropyl-N-(2-methyl-3-(1,4-dioxaspiro[4.5]decan-2-yl)allyl)-3-oxobutanamide (S19)**

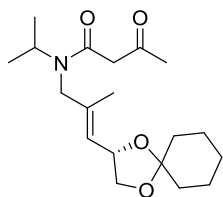

The crude allylic amine **S10** (1.0 g, 3.95 mmol, 1.0 equiv) was subjected to general procedure C using ethyl acetoacetate. The crude material was purified by silica gel column chromatography (30% → 40% EtOAc/cHex) providing the pure title compound as a yellow oil in 61% yield (815 mg, 2.41 mmol).  $R_f = 0.55$  (EtOAc/cHex = 1:1).  $^1\text{H NMR}$  (500 MHz,  $\text{CDCl}_3$ )  $\delta$  5.33 – 5.18 (m, 1H), 4.86 – 4.66 (m, 2H), 4.05 (dt,  $J = 8.1, 5.5$  Hz, 1H), 4.01 – 3.74 (m, 1H), 3.62 (dd,  $J = 9.1, 5.1$  Hz, 2H), 3.50 – 3.45 (m, 1H), 3.45 – 3.31 (m, 1H), 2.26 (d,  $J = 15.2$  Hz, 2H), 1.70 (d,  $J = 3.9$  Hz, 3H), 1.59 (m, 10H), 1.17 (d,  $J = 6.6$  Hz, 2H), 1.09 (dd,  $J = 17.6, 6.8$  Hz, 4H).  $^{13}\text{C NMR}$  (126 MHz,  $\text{CDCl}_3$ )  $\delta$  203.09, 167.70, 137.25, 136.58, 123.75, 123.05, 109.97, 109.61, 72.45, 72.18, 69.05, 68.97, 50.71, 50.66, 49.98, 49.09, 46.83, 45.97, 36.47, 35.67, 25.28, 25.22, 24.07, 24.04, 24.02, 21.29, 21.19, 20.15, 20.04, 15.35, 15.07. Multiple rotameric signals were observed. **IR (neat)**:  $\nu_{\text{max}}$  ( $\text{cm}^{-1}$ ): 2933, 1718, 1631, 1587, 1099. **HRMS (ESI)**:  $m/z$  calculated for  $\text{C}_{19}\text{H}_{31}\text{NO}_4\text{Na}^+$   $[\text{M}+\text{Na}]^+$  360.2137, found: 360.2150.  $[\alpha]_D^{20} = +10.43$  ( $c = 1.15$ ,  $\text{CHCl}_3$ ).

**(*S,E*)-*N*-(2-((2,2-dimethyl-1,3-dioxolan-4-yl)methylene)butyl)-*N*-(4-methoxybenzyl)-**

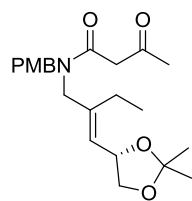

**3-oxobutanamide (S20)**

Allylic amine **S11** (1.02 g, 3.34 mmol, 1.0 equiv) was used in general procedure C using ethyl acetoacetate. After purification by silica gel column chromatography (10% → 50% EtOAc/cHex), the title compound and the starting material were isolated as a yellow oil in 41% yield (357 mg, 1.08 mmol) and 21% yield (218 mg, 0.71 mmol, 21%), respectively.  $R_f = 0.50$  (EtOAc/cHex = 3:7).  $^1\text{H NMR}$  (600 MHz,  $\text{CDCl}_3$ )  $\delta$  14.76 (s, 0.14H), 14.71 (s, 0.14H), 7.22 – 7.03 (m, 2H), 6.92 – 6.80 (m, 2H), 5.39 – 5.15 (m, 1H), 4.82 (tt,  $J = 8.3, 5.6$  Hz, 1H), 4.63 – 4.36 (m, 2H), 4.32 (m, 1H), 4.12 – 3.94 (m, 2H), 3.81 – 3.78 (m, 3H), 3.74 – 3.65 (m, 1H), 3.59 (s, 1H), 3.55 – 3.44 (m, 2H), 2.28 (s, 1H), 2.26 (s, 1H), 2.17 – 1.96 (m, 2H), 1.94 (d,  $J = 6.8$  Hz, 1H), 1.56 (s, 3H), 1.43 (s, 3H), 1.40 (s, 3H), 1.06 – 0.96 (m, 3H).  $^{13}\text{C NMR}$  (151 MHz,  $\text{CDCl}_3$ )  $\delta$  202.56, 167.57, 167.30, 159.37, 159.23, 141.84, 141.15, 129.64, 129.07, 127.97, 127.65, 124.52, 123.13, 122.56, 122.40, 114.57, 114.20, 113.90, 109.47, 109.28, 87.07, 72.49, 72.24, 69.64, 55.43, 53.94, 52.83, 51.17, 50.08, 49.27, 48.81, 48.30, 47.41, 30.52, 30.45, 26.99, 26.16, 26.12, 22.68, 22.25, 22.16, 14.09, 14.02. Multiple rotameric signals were observed. **IR (neat):**  $\nu_{\text{max}}$  ( $\text{cm}^{-1}$ ): 2979, 2937, 1722, 1635, 1612, 1585, 1512, 1488, 1440, 1417, 1369, 1301, 1244, 1211, 1174, 1155, 1110, 1054, 1031. **HRMS (ESI):**  $m/z$  calculated for  $\text{C}_{22}\text{H}_{32}\text{O}_5\text{N}$   $[\text{M}+\text{H}]^+ = 390.2275$ , found = 390.2271.  $[\alpha]_D^{20} = +9.41$  ( $c = 0.85$ ,  $\text{CHCl}_3$ ).

**ethyl (*S,E*)-3-((2-((2,2-dimethyl-1,3-dioxolan-4-yl)methylene)butyl)(4-methoxybenzyl)amino)-3-**

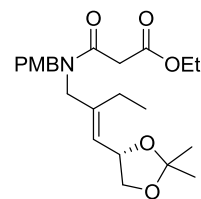

**oxopropanoate (S21)**

To a solution of allylic amine **S11** (1.3 g, 4.26 mmol, 1.0 equiv) in anhydrous  $\text{CH}_2\text{Cl}_2$  (50 mL) was added  $\text{Et}_3\text{N}$  (0.89 mL, 6.39 mmol, 1.5 equiv) and 4-dimethylaminopyridine (52 mg, 0.43 mmol, 0.1 equiv). The reaction mixture was cooled to 0 °C and ethyl malonyl chloride (0.65 mL, 5.11 mmol, 1.2 equiv) was added, after which the reaction mixture was stirred overnight at room temperature. TLC analysis indicated complete conversion and the reaction mixture was concentrated to  $\pm 5$  mL, diluted with EtOAc (50 mL) and washed with sat. aq.  $\text{NH}_4\text{Cl}$  (3x) and brine. The organic layer was dried ( $\text{Na}_2\text{SO}_4$ ), filtered and concentrated under reduced pressure. The crude product was purified by silica gel column chromatography (5% → 50% EtOAc/cHex) providing the title compound as a yellow oil in 65% yield (1.19 g, 2.8 mmol).  $R_f = 0.70$  (EtOAc/cHex = 3:7).  $^1\text{H NMR}$  (600 MHz,  $\text{CDCl}_3$ )  $\delta$  7.24 – 7.01 (m, 2H), 6.94 – 6.76 (m, 2H), 5.29 – 5.11 (m, 1H), 4.87 – 4.77 (m, 1H), 4.67 – 4.33 (m, 2H), 4.20 (dq,  $J = 8.4, 7.1$  Hz, 2H), 4.10 – 3.99 (m, 2H), 3.83 – 3.78 (m, 4H), 3.75 – 3.72 (m, 1H), 3.53 – 3.46 (m, 2H), 3.42 (d,  $J = 2.1$  Hz, 1H), 2.18 – 1.93 (m, 2H), 1.60 (s, 3H), 1.42 (s, 3H), 1.40 (s, 3H), 1.28 (td,  $J = 7.1, 1.3$  Hz, 3H), 1.06 – 0.90 (m, 3H).  $^{13}\text{C NMR}$  (151 MHz,  $\text{CDCl}_3$ )  $\delta$  167.75, 167.70, 167.25, 167.01, 166.71, 165.77, 164.50, 160.99, 160.33, 159.36, 159.22, 159.19, 141.92, 140.99, 129.63, 129.32, 129.09, 128.51, 127.84, 127.71, 126.18, 125.04, 122.76, 114.54, 114.12, 109.46, 109.23, 108.88, 88.35, 72.51, 72.23, 69.69, 69.62, 61.67, 61.36, 60.53, 55.41, 51.15, 49.77, 49.18, 48.20, 46.16, 46.04, 41.54, 41.29, 39.09, 26.97, 26.16, 22.63, 22.12, 21.19, 14.28, 14.02. Multiple rotameric signals were observed. **IR (neat):**  $\nu_{\text{max}}$  ( $\text{cm}^{-1}$ ): 2983, 1735, 1649, 1612, 1512, 1442, 1417, 1369, 1321, 1301, 1245, 1213, 1174, 1155, 1108, 1054, 1027. **HRMS (ESI):**  $m/z$  calculated for  $\text{C}_{23}\text{H}_{34}\text{O}_6\text{N}$   $[\text{M}+\text{H}]^+ = 420.2381$ , found = 420.2384.  $[\alpha]_D^{20} = +7.38$  ( $c = 1.63$ ,  $\text{CHCl}_3$ ).

**(*S,E*)-*N*-(2-((2,2-dimethyl-1,3-dioxolan-4-yl)methylene)butyl)-*N*-(4-methoxybenzyl)-2-(phenylsulfonyl)acetamide (S22)**

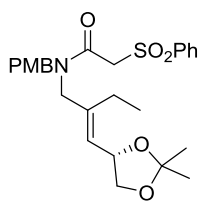

Prepared from allylic amine **S11** (990 mg, 3.25 mmol, 1.0 equiv) and (phenylsulfonyl)acetic acid (844 mg, 4.22 mmol, 1.3 equiv), according to general procedure D. Purification of the crude material by silica gel column chromatography (10% → 50% EtOAc/cHex) afforded the title compound as a yellow oil in 61% yield (962 mg, 1.98 mmol).  $R_f = 0.20$  (EtOAc/cHex = 3:7).  $^1\text{H NMR}$  (600 MHz,  $\text{CDCl}_3$ )  $\delta$  7.99 – 7.83 (m, 2H), 7.72 – 7.65 (m, 1H), 7.62 – 7.51 (m, 2H), 7.19 – 7.02 (m, 2H), 6.94 – 6.84 (m, 2H), 5.42 – 5.09 (m, 1H), 4.89 – 4.77 (m, 1H), 4.66 (s, 1H), 4.48 (dd,  $J = 78.4, 15.6$  Hz, 1H), 4.25 – 4.07 (m, 2H), 4.06 – 3.96 (m, 3H), 3.82 – 3.80 (m, 3H), 3.64 – 3.38 (m, 1H), 2.22 – 1.94 (m, 2H), 1.57 (s, 3H), 1.46 – 1.37 (m, 6H), 1.07 – 1.00 (m, 3H).  $^{13}\text{C NMR}$  (151 MHz,  $\text{CDCl}_3$ )  $\delta$  162.36, 162.11, 159.48, 159.34, 141.19, 141.10, 139.01, 138.94, 134.38, 129.61, 129.29, 128.67, 128.60, 127.61, 127.52, 124.87, 122.55, 114.71, 114.22, 109.48, 109.38, 72.51, 72.19, 69.73, 69.61, 60.14, 55.46, 51.43, 50.26, 49.98, 49.06, 26.97, 26.20, 26.12, 22.82, 22.19, 14.00, 13.96. Multiple rotameric signals were observed. **IR** (neat):  $\nu_{\text{max}}$  ( $\text{cm}^{-1}$ ): 2985, 2343, 1649, 1612, 1512, 1446, 1419, 1371, 1321, 1309, 1245, 1222, 1176, 1085, 1054, 1027. **HRMS** (ESI):  $m/z$  calculated for  $\text{C}_{26}\text{H}_{34}\text{O}_6\text{NS}$   $[\text{M}+\text{H}]^+ = 488.2101$ , found = 488.2102.  $[\alpha]_D^{20} = +6.25$  ( $c = 1.60$ ,  $\text{CHCl}_3$ ).

**(*S,E*)-*N*-(3-(1,4-dioxaspiro[4.5]decan-2-yl)allyl)-*N*-(4-methoxybenzyl)-3-oxobutanamide (S24)**

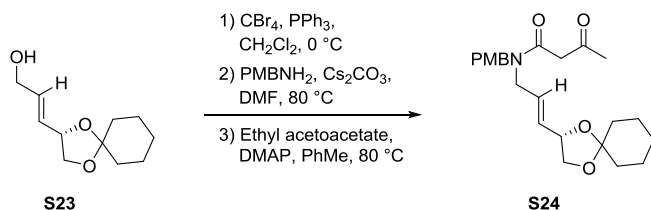

Allylic alcohol **S23** (366 mg, 1.87 mmol, 1.0 equiv) was prepared as reported by Iwabuchi *et al.*<sup>3</sup> and subjected to general procedure A, affording the pure allylic bromide in 60% yield (296 mg, 1.13 mmol) after silica gel column chromatography (1% → 8% EtOAc/cHex).  $R_f = 0.7$  (EtOAc/cHex = 3:7).  $^1\text{H NMR}$  (300 MHz,  $\text{CDCl}_3$ )  $\delta$  6.09 – 5.93 (m, 1H), 5.75 (dd,  $J = 15.2, 7.1$  Hz, 1H), 4.53 (q,  $J = 6.9$  Hz, 1H), 4.10 (dd,  $J = 8.2, 6.2$  Hz, 1H), 4.03 – 3.86 (m, 2H), 3.60 (t,  $J = 7.8$  Hz, 1H), 1.70 – 1.31 (m, 10H). The allylic bromide (296 mg, 1.13 mmol) was subsequently used in general procedure B, providing the crude allylic amine (331 mg, *theor.* 1.04 mmol, 92%) which was directly converted to the allylic amide in general procedure C using ethyl acetoacetate. Purification of the crude material by silica gel column chromatography (5% → 65% EtOAc/cHex) afforded the title compound as a yellow oil in 45% yield (187 mg, 0.47 mmol).  $R_f = 0.3$  (EtOAc/cHex = 2:3).  $^1\text{H NMR}$  (500 MHz,  $\text{CDCl}_3$ )  $\delta$  7.20 – 7.05 (m, 2H), 6.90 – 6.81 (m, 2H), 5.78 – 5.62 (m, 1H), 5.60 – 5.49 (m, 1H), 4.57 – 4.44 (m, 3H), 4.41 – 4.35 (m, 1H), 4.09 – 4.02 (m, 1H), 4.00 – 3.95 (m, 1H), 3.80 (s, 1H), 3.79 (s, 2H), 3.58 – 3.54 (m, 1H), 3.54 – 3.49 (m, 1H), 2.28 (s, 1H), 2.26 (s, 1H), 1.96 – 1.90 (m, 1H), 1.68 (s, 1H), 1.64 – 1.34 (m, 10H). Multiple rotameric and keto-enol signals were observed.  $^{13}\text{C NMR}$  (126 MHz,  $\text{CDCl}_3$ )  $\delta$  202.59, 202.49, 167.01, 159.35, 159.16, 131.58, 131.03, 130.75, 129.63, 128.98, 128.25, 127.93, 127.90, 127.81, 114.49, 114.31, 114.13, 114.07, 110.33, 110.12, 87.10, 76.08, 75.84, 75.74, 69.13, 69.09, 55.39, 50.54, 50.03, 49.57, 48.54, 48.01, 47.53, 46.77, 46.20, 36.35, 35.47, 30.53, 25.20, 24.07, 22.20. **IR** (neat):  $\nu_{\text{max}}$  ( $\text{cm}^{-1}$ ): 2933, 2856, 1718, 1612, 1488, 1363, 1301, 1278, 1207, 1161, 1033, 973, 927. **HRMS** (ESI):  $m/z$  calculated for  $\text{C}_{23}\text{H}_{31}\text{O}_5\text{NNa}^+$   $[\text{M}+\text{Na}]^+ = 424.2086$ , found: 424.2080.  $[\alpha]_D^{20} = +15.4$  ( $c = 0.91$ ,  $\text{CHCl}_3$ ).

## Synthesis of carbon analogous acetal

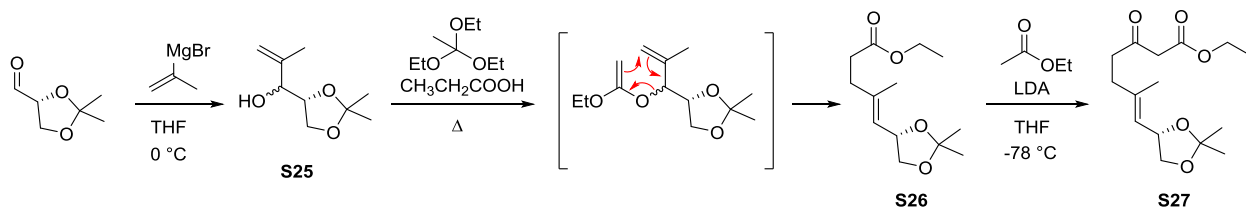

### 1-((R)-2,2-dimethyl-1,3-dioxolan-4-yl)-2-methylprop-2-en-1-ol (S25)

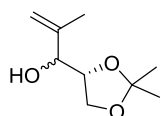

A solution of isopropenylmagnesium bromide in THF (0.5 M, 30 mL, 15 mmol, 1.5 equiv) was cooled to 0 °C after which a solution of (R)-2,2-dimethyl-1,3-dioxolane-4-carbaldehyde (1.3 g, 10 mmol, 1.0 equiv) in CH<sub>2</sub>Cl<sub>2</sub> (2.0 mL) was added dropwise. The resulting suspension was stirred for 5 hours at room temperature. The reaction mixture was quenched by the addition of sat. aq. NH<sub>4</sub>Cl solution (20 mL). The aqueous phase was extracted with EtOAc (3 x 50 mL). The combined organics were dried (Na<sub>2</sub>SO<sub>4</sub>) and concentrated under reduced pressure, affording the crude title compound (1.72 g, 10 mmol, quantitative), which was directly used in the next reaction.  $R_f = 0.3$  (EtOAc/cHex = 1:4). <sup>1</sup>H NMR (300 MHz, CDCl<sub>3</sub>) δ 5.15 – 5.04 (m, 1H), 4.97 (h,  $J = 1.3$  Hz, 1H), 4.32 – 4.12 (m, 1H), 4.04 – 3.90 (m, 2H), 3.83 – 3.70 (m, 1H), 1.79 (q,  $J = 1.4$  Hz, 3H), 1.48 (s, 3H), 1.40 (s, 3H). IR (neat):  $\nu_{max}$  (cm<sup>-1</sup>): 2995, 1736, 1418, 1247, 1159, 1058, 975, 863, 846, 415. HRMS (ESI):  $m/z$  calculated for C<sub>9</sub>H<sub>16</sub>O<sub>3</sub>Na [M+Na]<sup>+</sup> = 195.0997, found = 195.0994.

### ethyl (S,E)-5-(2,2-dimethyl-1,3-dioxolan-4-yl)-4-methylpent-4-enoate (S26)

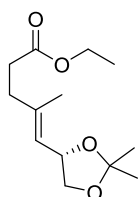

A flamedried flask was charged with S25 (1.8 g, 10.5 mmol, 1.0 equiv), triethyl orthoacetate (9.6 ml, 52 mmol, 5.0 equiv) and propionic acid (233 μl, 3.2 mmol, 0.3 equiv). The reaction mixture was heated to 150 °C and was stirred for 2 h. After TLC analysis indicated full conversion, the reaction mixture was allowed to cool to room temperature and was concentrated under reduced pressure. The crude product was purified by silica gel column chromatography (10% EtOAc/cHex), providing the title compound in 70% yield (1.75 g, 7.35 mmol).  $R_f = 0.30$  (EtOAc/cHex = 1:5). <sup>1</sup>H NMR (600 MHz, CDCl<sub>3</sub>) δ 5.23 (dq,  $J = 8.5, 1.4$  Hz, 1H), 4.80 (td,  $J = 8.3, 5.9$  Hz, 1H), 4.14 (q,  $J = 7.1$  Hz, 2H), 4.06 (dd,  $J = 8.0, 6.0$  Hz, 1H), 3.49 (t,  $J = 8.1$  Hz, 1H), 2.56 – 2.32 (m, 4H), 1.75 (s, 3H), 1.42 (s, 6H), 1.27 (t,  $J = 7.1$  Hz, 3H). <sup>13</sup>C NMR (151 MHz, CDCl<sub>3</sub>) δ 173.18, 140.25, 122.89, 109.01, 72.94, 72.60, 69.55, 60.54, 34.58, 32.79, 26.95, 26.14, 16.83, 14.37. IR (neat):  $\nu_{max}$  (cm<sup>-1</sup>): 2987, 1735, 1371, 1236, 1157, 1043, 864, 848, 603, 401. HRMS (ESI):  $m/z$  calculated for C<sub>13</sub>H<sub>22</sub>O<sub>4</sub>Na [M+Na]<sup>+</sup> = 265.1410, found = 265.1399.  $[\alpha]_D^{20} = +11.42$  (c = 1.75, CHCl<sub>3</sub>).

**ethyl (S,E)-7-(2,2-dimethyl-1,3-dioxolan-4-yl)-6-methyl-3-oxohept-6-enoate (S27)**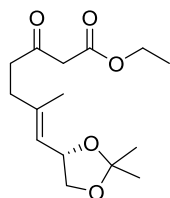

A solution of lithium bis(trimethylsilyl)amide (1.0 M in THF, 12.4 mL, 12.4 mmol, 2.0 equiv) was cooled to  $-78\text{ }^{\circ}\text{C}$ , after which anhydrous ethyl acetate (1.2 mL, 12.4 mmol, 2.0 equiv) was added dropwise. The reaction mixture was stirred at  $-78\text{ }^{\circ}\text{C}$  for 1h, after which a solution of **S26** (1.5 g, 6.2 mmol, 1.0 equiv) in THF (5.0 mL) was added dropwise. The reaction mixture was slowly warmed to room temperature and was stirred for 16 hours. Subsequently, the reaction mixture was quenched by the addition of sat. aq.  $\text{NH}_4\text{Cl}$  solution (20 mL). The aqueous phase was extracted with EtOAc (3 x 50 mL), dried ( $\text{Na}_2\text{SO}_4$ ) and concentrated under reduced pressure. After purification by silica gel column chromatography (5%  $\rightarrow$  10% EtOAc/cHex), the pure title compound was obtained in 50% yield (0.88 g, 3.1 mmol).  $R_f = 0.30$  (EtOAc/cHex = 1:5).  $^1\text{H NMR}$  (600 MHz,  $\text{CDCl}_3$ )  $\delta$  5.16 – 5.10 (m, 1H), 4.76 – 4.65 (m, 1H), 4.18 – 4.07 (m, 2H), 4.07 – 4.00 (m, 1H), 3.98 (dd,  $J = 8.1, 6.0$  Hz, 1H), 3.37 (s, 2H), 2.65 – 2.59 (m, 2H), 2.34 – 2.20 (m, 2H), 1.66 (s, 3H), 1.38 – 1.30 (m, 6H), 1.21 (td,  $J = 7.2, 3.3$  Hz, 3H).  $^{13}\text{C NMR}$  (151 MHz,  $\text{CDCl}_3$ )  $\delta$  201.90, 171.88, 167.09, 140.06, 128.00, 122.73, 108.90, 89.32, 76.81, 72.69, 69.40, 61.44, 60.67, 49.34, 44.93, 41.08, 32.78, 26.83, 26.01, 16.87, 14.12. **IR (neat):**  $\nu_{\text{max}}$  ( $\text{cm}^{-1}$ ): 2985, 2935, 2337, 1317, 1305, 1116, 1056, 1024, 850, 513, 493, 403. **HRMS (ESI):**  $m/z$  calculated for  $\text{C}_{15}\text{H}_{24}\text{O}_5\text{Na}$   $[\text{M}+\text{Na}]^+ = 307.1521$ , found = 307.1516.  $[\alpha]_D^{20} = +15$  ( $c = 0.8$ ,  $\text{CHCl}_3$ ).

**(S,Z)-N-(4-methoxybenzyl)-N-(2-methyl-3-(1,4-dioxaspiro[4.5]decan-2-yl)allyl)-3-oxobutanamide (S28)**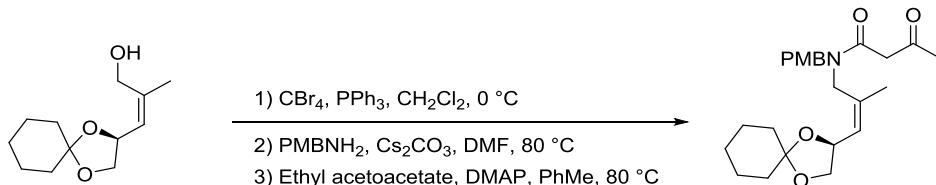

Allylic alcohol **S03** (635 mg, 2.31 mmol, 1.0 equiv) was subjected to general procedure A, affording the crude allylic bromide (559 mg, 2.04 mmol) which was subsequently used in general procedure B. The obtained crude allylic amine (660 mg, *theor.* 1.99 mmol) was used in general procedure C using ethyl acetoacetate. Purification of the crude material by silica gel column chromatography (10%  $\rightarrow$  40% EtOAc/cHex) afforded the pure title compound as a yellow oil in 74% yield (610 mg, 1.47 mmol).  $R_f = 0.3$  (EtOAc/cHex = 3:7).  $^1\text{H NMR}$  (600 MHz,  $\text{CDCl}_3$ )  $\delta$  7.15 (m, 2H), 6.86 (m, 2H), 5.48 – 5.38 (m, 1H), 4.61 – 4.47 (m, 1H), 4.46 – 4.39 (m, 1H), 3.96 – 3.83 (m, 2H), 3.80 (s, 2H), 3.79 (s, 1H), 3.68 – 3.56 (m, 2H), 3.49 – 3.39 (m, 1H), 2.29 (s, 0.8H), 2.27 (s, 1.2H), 1.75 (s, 1H), 1.72 (s, 2H), 1.66 – 1.31 (m, 10H). Multiple rotameric and keto-enol signals were observed.  $^{13}\text{C NMR}$  (151 MHz,  $\text{CDCl}_3$ )  $\delta$  202.47, 202.35, 175.81, 172.59, 167.33, 167.19, 159.43, 159.20, 137.29, 137.01, 135.98, 131.76, 129.65, 129.61, 129.23, 128.86, 128.76, 128.48, 128.10, 128.05, 127.79, 127.69, 114.56, 114.36, 114.15, 110.09, 109.82, 71.64, 71.60, 71.08, 69.20, 69.11, 55.46, 55.39, 50.39, 50.13, 49.44, 48.31, 47.16, 47.11, 43.90, 36.54, 36.52, 35.61, 35.56, 30.55, 30.44, 25.25, 25.23, 24.09, 24.06, 24.03, 24.00, 21.50, 21.11. **IR (neat):**  $\nu_{\text{max}}$  ( $\text{cm}^{-1}$ ): 3348, 2974, 2933, 1722, 1639, 1512, 1444, 1247, 1174, 1108, 931. **HRMS (ESI):**  $m/z$  calculated for  $\text{C}_{24}\text{H}_{33}\text{NO}_5\text{Na}^+$  ( $[\text{M}+\text{Na}]^+$ ) = 438.2251, found = 438.2264.  $[\alpha]_D^{20} = +28.57$  ( $c = 1.89$ ,  $\text{CHCl}_3$ ).

## Diacetates

### (*S,E*)-5-(*N*-(4-methoxybenzyl)-3-oxobutanamido)-4-methylpent-3-ene-1,2-diyl diacetate (**3a**)

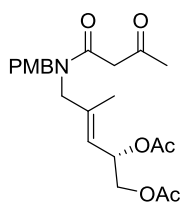

Cyclohexylidene protected diol **S12** (531 mg, 1.28 mmol, 1.0 equiv) was subjected to general procedure E and the crude material was purified by silica gel column chromatography (30% → 50% EtOAc/cHex), providing the pure title compound as a yellow oil in 89% yield (478 mg, 1.14 mmol) over 2 steps.  $R_f = 0.3$  (EtOAc/cHex = 1:1).  $^1\text{H NMR}$  (500 MHz,  $\text{CDCl}_3$ )  $\delta$  7.20 – 7.13 (m, 1H), 7.05 (dd,  $J = 12.1, 8.3$  Hz, 1H), 6.93 – 6.80 (m, 2H), 5.79 – 5.63 (m, 1H), 5.22 – 5.07 (m, 1H), 4.58 – 4.31 (m, 2H), 4.20 – 3.91 (m, 4H), 3.85 – 3.77 (m, 3H), 2.27 (d,  $J = 6.1$  Hz, 2H), 2.11 – 2.05 (m, 6H), 2.04 (s, 3H), 1.77 – 1.67 (m, 3H).  $^{13}\text{C NMR}$  (126 MHz,  $\text{CDCl}_3$ )  $\delta$  202.46, 170.88, 170.84, 170.37, 167.51, 167.28, 159.34, 159.17, 137.61, 136.71, 129.60, 128.78, 127.92, 127.74, 127.68, 121.67, 120.27, 114.50, 114.13, 68.87, 64.95, 60.55, 55.39, 53.27, 52.67, 51.16, 49.87, 48.12, 47.56, 30.53, 21.23, 20.95, 15.35, 15.13, 14.33. Multiple rotameric signals were observed. **IR (neat)**:  $\nu_{\text{max}}$  ( $\text{cm}^{-1}$ ): 1739, 1639, 1514, 1438, 1371, 1299, 1244, 1224, 1176, 1039. **HRMS (ESI)**: calculated for  $\text{C}_{22}\text{H}_{29}\text{NO}_7\text{Na}$  ( $[\text{M}+\text{Na}]^+$ ) = 442.1836, found = 442.1829.  $[\alpha]_D^{20} = +26.12$  ( $c = 2.45$ ,  $\text{CHCl}_3$ ). **SFC-MS (method 1)**: 92% ee:  $t_{\text{ret.}}$  (major) = 4.65 min. (96%),  $t_{\text{ret.}}$  (minor) = 4.49 min. (4%).

### (*S,E*)-5-(*N*-(4-methoxybenzyl)-2-(phenylsulfonyl)acetamido)-4-methylpent-3-ene-1,2-diyl diacetate (**3b**)

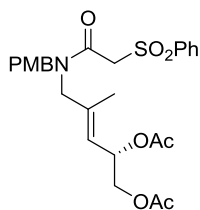

Prepared from acetal **S13** (384 mg, 0.75 mmol, 1.0 equiv), according to general procedure E. Purification of the crude material by silica gel column chromatography (50% EtOAc/cHex) afforded the title compound as a yellow oil in 91% yield (354 mg, 0.68 mmol) over 2 steps.  $R_f = 0.36$  (cyclohexane/EtOAc = 1:1).  $^1\text{H NMR}$  (600 MHz,  $\text{CDCl}_3$ )  $\delta$  7.96 – 7.87 (m, 2H), 7.73 – 7.64 (m, 1H), 7.61 – 7.55 (m, 2H), 7.19 – 7.03 (m, 2H), 6.92 – 6.84 (m, 2H), 5.81 – 5.66 (m, 1H), 5.35 – 5.07 (m, 1H), 4.68 – 4.38 (m, 2H), 4.24 – 4.13 (m, 2H), 4.21 – 4.02 (m, 2H), 3.99 – 3.93 (m, 2H), 3.81 (s, 1.5H), 3.81 (s, 1.5H), 2.10 – 2.07 (m, 3H), 2.07 (s, 3H), 1.75 (s, 1H), 1.74 (s, 2H). Multiple rotameric signals were observed.  $^{13}\text{C NMR}$  (151 MHz,  $\text{CDCl}_3$ )  $\delta$  170.94, 170.79, 170.32, 170.30, 162.35, 162.20, 159.53, 159.36, 138.99, 138.90, 137.20, 136.75, 134.43, 134.39, 129.65, 129.32, 129.29, 128.71, 128.65, 128.39, 127.57, 127.42, 121.39, 120.66, 114.72, 114.22, 68.85, 68.73, 64.99, 64.79, 60.07, 59.99, 55.51, 55.46, 53.66, 52.00, 50.48, 48.99, 21.29, 21.20, 20.97, 20.92, 15.48, 15.28. **IR (neat)**:  $\nu_{\text{max}}$  ( $\text{cm}^{-1}$ ): 2931, 1735, 1649, 1514, 1446, 1369, 1321, 1309, 1244, 1224, 1157, 1033. **HRMS (ESI)**:  $m/z$  calculated for  $\text{C}_{26}\text{H}_{31}\text{NO}_8\text{SNa}^+$   $[\text{M}+\text{Na}]^+$  540.1662, found: 540.1644.  $[\alpha]_D^{20} = +30.0$  ( $c = 0.40$ ,  $\text{CHCl}_3$ ). **SFC-MS (method 1)**: 87% ee:  $t_{\text{ret.}}$  (major) = 8.75 min. (93.4%),  $t_{\text{ret.}}$  (minor) = 7.64 min. (6.5%).

**(S,E)-5-(N-(4-methoxybenzyl)-3-oxo-3-phenylpropanamido)-4-methylpent-3-ene-1,2-diyl diacetate (3c)**

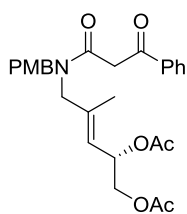

Prepared from acetal **S14** (1.0 g, 2.1 mmol, 1.0 equiv), according to general procedure E. Purification of the crude material by silica gel column chromatography (25% EtOAc/cHex) afforded the title compound as a yellow oil in 75% yield (757 mg, 1.57 mmol) over 2 steps.  $R_f = 0.80$  (EtOAc/cHex = 1:1).  $^1\text{H NMR}$  (600 MHz,  $\text{CDCl}_3$ )  $\delta$  8.03 – 7.89 (m, 1H), 7.78 – 7.67 (m, 1H), 7.66 – 7.35 (m, 3H), 7.24 – 7.04 (m, 2H), 6.91 – 6.82 (m, 2H), 5.79 – 5.66 (m, 1H), 5.27 – 5.12 (m, 1H), 4.62 – 4.33 (m, 2H), 4.21 – 3.94 (m, 4H), 3.81 (s, 1H), 3.80 – 3.78 (m, 2H), 3.76 (s, 1H), 2.10 – 1.94 (m, 6H), 1.79 – 1.73 (m, 2H), 1.70 (s, 1H). Multiple rotameric and keto-enol tautomeric signals were observed.  $^{13}\text{C NMR}$  (151 MHz,  $\text{CDCl}_3$ )  $\delta$  194.14, 194.06, 172.94, 172.80, 172.33, 172.00, 170.86, 170.81, 170.34, 170.31, 168.01, 167.74, 159.38, 159.33, 159.24, 159.16, 137.99, 137.82, 137.06, 136.85, 136.35, 136.26, 134.92, 133.89, 130.93, 129.72, 129.57, 129.22, 128.92, 128.90, 128.86, 128.81, 128.73, 128.62, 128.59, 128.24, 128.05, 128.01, 127.85, 126.14, 126.06, 121.72, 121.54, 120.50, 120.46, 114.52, 114.46, 114.17, 114.15, 85.06, 84.83, 68.93, 68.90, 64.99, 64.90, 64.85, 55.48, 55.46, 55.41, 53.48, 53.11, 51.27, 50.98, 50.02, 49.27, 48.19, 48.14, 46.09, 45.78, 21.27, 21.23, 21.11, 20.93, 20.84, 15.39, 15.36, 15.26, 15.11. **IR (neat)**:  $\nu_{\text{max}}$  ( $\text{cm}^{-1}$ ): 1735, 1623, 1612, 1512, 1479, 1369, 1242, 1220, 1176, 1033. **HRMS (ESI)**:  $m/z$  calculated for  $\text{C}_{27}\text{H}_{31}\text{NO}_7\text{Na}^+$   $[\text{M}+\text{Na}]^+$  504.1993, found: 504.1976.  $[\alpha]_D^{20} = +20.0$  ( $c = 1.00$ ,  $\text{CHCl}_3$ ). **SFC-MS (method 1)**: 100% ee;  $t_{\text{ret.}} = 5.48$  min. (100%).

**(S,E)-5-(3-ethoxy-N-(4-methoxybenzyl)-3-oxopropanamido)-4-methylpent-3-ene-1,2-diyl diacetate (3d)**

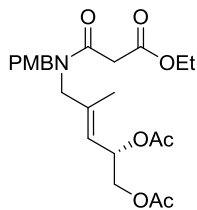

Prepared from acetal **S15** (463 mg, 1.04 mmol, 1.0 equiv), according to general procedure E. Purification of the crude material by silica gel column chromatography (45% EtOAc/cHex) afforded the title compound as a yellow oil in 60% yield (280 mg, 0.62 mmol) over 2 steps.  $R_f = 0.50$  (EtOAc/cHex = 3:2).  $^1\text{H NMR}$  (500 MHz,  $\text{CDCl}_3$ )  $\delta$  7.11 (dd,  $J = 60.1, 8.4$  Hz, 2H), 6.86 (dd,  $J = 20.5, 8.6$  Hz, 2H), 5.78 – 5.65 (m, 1H), 5.15 (d,  $J = 8.4$  Hz, 1H), 4.49 (s, 1H), 4.35 (s, 1H), 4.25 – 4.01 (m, 4H), 4.00 – 3.93 (m, 1H), 3.80 (s, 1H), 3.79 (s, 2H), 3.70 (s, 1H), 3.51 (s, 1H), 3.39 (s, 1H), 2.07 (d, 6H), 1.72 (d,  $J = 14.3$  Hz, 3H), 1.32 – 1.25 (m, 3H).  $^{13}\text{C NMR}$  (126 MHz,  $\text{CDCl}_3$ )  $\delta$  170.87, 170.85, 170.38, 170.30, 167.70, 167.67, 166.99, 166.71, 159.36, 159.17, 137.73, 136.58, 129.63, 128.81, 127.76, 127.62, 121.84, 120.43, 114.50, 114.09, 68.90, 68.83, 64.95, 64.85, 61.73, 61.71, 55.47, 55.40, 53.27, 51.12, 49.80, 48.11, 41.50, 41.22, 21.26, 21.21, 20.94, 15.35, 15.05, 14.26. Multiple rotameric and tautomeric signals were observed. **IR (neat)**:  $\nu_{\text{max}}$  ( $\text{cm}^{-1}$ ): 2981, 1731, 1647, 1512, 1456, 1367, 1240, 1218, 1174, 1031. **HRMS (ESI)**:  $m/z$  calculated for  $\text{C}_{23}\text{H}_{31}\text{NO}_8\text{Na}^+$   $[\text{M}+\text{Na}]^+$  472.1942, found: 472.1935.  $[\alpha]_D^{20} = +26.7$  ( $c = 0.60$ ,  $\text{CHCl}_3$ ). **SFC-MS (method 1)**: 97% ee;  $t_{\text{ret.}}$  (major) = 3.47 min. (98.6%),  $t_{\text{ret.}}$  (minor) = 3.91 min. (1.4%).



**(S,E)-5-(2-cyano-N-(4-methoxybenzyl)acetamido)-4-methylpent-3-ene-1,2-diyl diacetate (3e)**

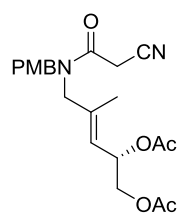

Prepared from acetal **S16** (175 mg, 0.44 mmol, 1.0 equiv), according to general procedure E. Purification of the crude material by silica gel column chromatography (50% EtOAc/cHex) afforded the title compound as a yellow oil in 83% yield (146 mg, 0.36 mmol) over 2 steps.  $R_f = 0.30$  (EtOAc/cHex = 1:1).  $^1\text{H NMR}$  (500 MHz,  $\text{CDCl}_3$ )  $\delta$  7.00 (dd,  $J = 156.2, 8.6$  Hz, 2H), 6.97 (dd,  $J = 67.9, 8.6$  Hz, 2H), 5.70 (ddd,  $J = 8.7, 7.4, 3.9$  Hz, 0.33H), 5.65 (ddd,  $J = 8.7, 7.1, 3.8$  Hz, 0.67H), 5.15 – 5.08 (m, 1H), 4.52 – 4.43 (m, 1.33H), 4.38 – 4.30 (m, 0.67H), 4.19 – 4.11 (m, 1H), 4.08 – 3.91 (m, 2H) 3.81 (s, 1H), 3.79 (s, 2H), 3.69 (s, 1H), 3.52 (s, 1H), 3.45 (d,  $J = 2.3$  Hz, 1H), 2.08 (s, 3H), 2.06 (s, 3H), 1.74 – 1.70 (m, 3H).  $^{13}\text{C NMR}$  (126 MHz,  $\text{CDCl}_3$ )  $\delta$  170.84, 170.44, 170.28, 162.63, 162.49, 159.62, 159.48, 137.00, 135.77, 130.01, 128.84, 128.06, 127.53, 127.36, 126.59, 122.67, 120.78, 114.81, 114.26, 113.99, 113.96, 68.84, 68.77, 64.76, 64.67, 55.49, 55.41, 53.27, 51.97, 49.95, 49.33, 25.40, 25.06, 21.22, 21.19, 20.91, 15.36, 15.17. Rotamers were observed in a 1:2 ratio. **IR (neat)**:  $\nu_{\text{max}}$  ( $\text{cm}^{-1}$ ): 2923, 1733, 1658, 1512, 1440, 1369, 1242, 1176, 1031, 960. Mass could not be observed by HRMS.  $[\alpha]_D^{20} = +21.7$  ( $c = 1.20$ ,  $\text{CHCl}_3$ ).

**(S,E)-4-methyl-5-(4,4,4-trifluoro-N-(4-methoxybenzyl)-3-oxobutanamido)pent-3-ene-1,2-diyl diacetate (3f)**

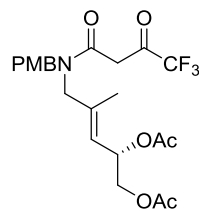

Prepared from acetal **S17** (563 mg, 1.2 mmol, 1.0 equiv), according to general procedure E. Purification of the crude material by silica gel column chromatography (35% EtOAc/cHex) afforded the title compound as a yellow oil in 92% yield (524 mg, 1.1 mmol) over 2 steps.  $R_f = 0.60$  (EtOAc/cHex = 1:1).  $^1\text{H NMR}$  (600 MHz,  $\text{CDCl}_3$ )  $\delta$  7.19 – 7.04 (m, 2H), 6.93 – 6.83 (m, 2H), 5.74 – 5.65 (m, 1H), 5.20 – 5.09 (m, 1H), 4.61 – 4.36 (m, 2H), 4.22 – 3.91 (m, 3H), 3.81 (s, 1H), 3.80 (s, 2H), 3.76 – 3.68 (m, 1H), 2.91 – 2.77 (m, 1H), 2.68 (s, 1H), 2.10 – 2.01 (m, 6H), 1.73 (s, 3H). Multiple rotameric and keto-enol tautomeric signals were observed.  $^{13}\text{C NMR}$  (151 MHz,  $\text{CDCl}_3$ )  $\delta$  171.59, 171.26, 170.96, 170.87, 170.37, 170.31, 159.60, 159.47, 136.92, 135.86, 129.90, 129.74, 128.11, 127.88, 126.98, 123.44, 122.46, 121.97, 121.55, 121.34, 120.88, 114.68, 114.64, 114.31, 68.79, 68.74, 68.66, 64.76, 64.73, 55.49, 55.44, 53.05, 51.55, 51.10, 50.05, 49.33, 48.76, 48.44, 33.59, 33.30, 21.23, 21.10, 20.93, 20.87, 15.34, 15.17. **IR (neat)**:  $\nu_{\text{max}}$  ( $\text{cm}^{-1}$ ): 1735, 1612, 1514, 1461, 1442, 1371, 1245, 1222, 1174, 1107, 1033. **HRMS (ESI)**:  $m/z$  calculated for  $\text{C}_{22}\text{H}_{26}\text{NO}_7\text{F}_3\text{Na}^+$   $[\text{M}+\text{Na}]^+$  496.1553, found: 496.1554.  $[\alpha]_D^{20} = +30.0$  ( $c = 1.00$ ,  $\text{CHCl}_3$ ).

**(S,E)-4-methyl-5-(N-methyl-3-oxobutanamido)pent-3-ene-1,2-diyl diacetate (3g)**

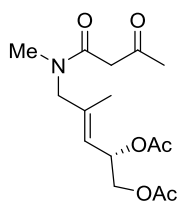

Acetal **S18** (107 mg, 0.34 mmol, 1.0 equiv) was subjected to general procedure E. The crude product was purified by silica gel column chromatography (1% → 2% MeOH/CH<sub>2</sub>Cl<sub>2</sub>) providing the title compound as a yellow oil in 83% yield (88 mg, 0.28 mmol) over 2 steps.  $R_f = 0.1$  (MeOH/CH<sub>2</sub>Cl<sub>2</sub> = 1:99). <sup>1</sup>H NMR (600 MHz, CDCl<sub>3</sub>) δ 5.78 – 5.63 (m, 1H), 5.24 – 5.06 (m, 1H), 4.22 – 3.99 (m, 2H), 3.95 (s, 1H), 3.77 (s, 1H), 3.58 (s, 1H), 3.43 (s, 1H), 2.93 – 2.78 (m, 3H), 2.30 – 2.20 (m, 3H), 2.06 – 2.00 (m, 6H), 1.69 (t,  $J = 12.3$  Hz, 3H). <sup>13</sup>C NMR (151 MHz, CDCl<sub>3</sub>) δ 202.31, 202.14, 170.76, 170.73, 170.24, 170.20, 137.72, 136.77, 133.87, 131.66, 129.48, 124.06, 123.60, 121.66, 121.54, 121.03, 120.34, 120.15, 86.79, 68.75, 68.10, 65.11, 64.87, 64.75, 56.72, 53.85, 50.23, 49.63, 35.07, 34.08, 30.34, 21.14, 20.82, 15.13, 14.87. Multiple rotameric signals were observed. IR (neat):  $\nu_{max}$  (cm<sup>-1</sup>): 2935, 2864, 1739, 1676, 1639, 1444, 1407, 1367, 1224, 1163, 1097, 1039, 925. HRMS (ESI): calculated for C<sub>15</sub>H<sub>23</sub>NO<sub>6</sub>Na ([M+Na]<sup>+</sup>) = 336.1418, found = 336.1403.  $[\alpha]_D^{20} = +15.45$  (c = 2.2, CHCl<sub>3</sub>). SFC-MS (method 1): 95% ee:  $t_{ret.}$  (major) = 5.97 min. (97.5%),  $t_{ret.}$  (minor) = 9.59 min. (2.5%).

**(S,E)-5-(N-isopropyl-3-oxobutanamido)-4-methylpent-3-ene-1,2-diyl diacetate (3h)**

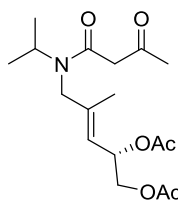

Acetal **S19** (793 mg, 2.35 mmol, 1.0 equiv) was subjected to general procedure E. The crude product was purified by silica gel column chromatography (0.5% MeOH/CH<sub>2</sub>Cl<sub>2</sub>) providing the pure title compound as a yellow oil in 56% yield (450 mg, 1.32 mmol) over 2 steps.  $R_f = 0.1$  (EtOAc/cHex = 3:7). <sup>1</sup>H NMR (500 MHz, CDCl<sub>3</sub>, rotamers observed in 3:7 ratio) δ 14.92 (s, 0.06H), 14.70 (s, 0.17H), 5.74 (td,  $J = 8.2, 3.7$  Hz, 0.3H), 5.68 (td,  $J = 8.0, 3.7$  Hz, 0.7H), 5.22 – 5.15 (m, 0.7H), 5.15 – 5.07 (m, 0.3H), 4.83 – 4.68 (m, 0.7H), 4.18 – 4.08 (m, 1H), 4.08 – 3.99 (m, 1H), 3.94 (p,  $J = 6.7$  Hz, 0.3H), 3.88 – 3.83 (m, 0.3H), 3.66 – 3.58 (m, 2H), 3.33 (s, 1H), 2.27 (s, 0.7H), 2.23 (s, 1.3H), 2.06 – 2.00 (m, 6H), 1.79 – 1.73 (m, 3H), 1.17 – 1.11 (m, 2H), 1.09 – 1.04 (m, 4H). <sup>13</sup>C NMR (126 MHz, CDCl<sub>3</sub>) δ 202.86, 202.51, 174.84, 172.80, 170.86, 170.83, 170.80, 170.37, 170.33, 170.28, 167.71, 166.33, 139.13, 138.45, 137.90, 119.85, 119.75, 118.78, 88.45, 86.94, 69.13, 69.03, 68.89, 65.04, 64.90, 64.82, 50.56, 50.26, 49.93, 48.70, 48.22, 48.10, 46.49, 46.13, 45.75, 44.52, 30.62, 30.34, 22.00, 21.21, 21.14, 21.05, 20.90, 20.88, 20.05, 19.93, 15.58, 15.49, 15.40. Multiple rotameric signals were observed. IR (neat):  $\nu_{max}$  (cm<sup>-1</sup>): 2923, 1735, 1631, 1589, 1433, 1367, 1220, 1163, 1128, 1112, 1076, 1041. HRMS (ESI):  $m/z$  calculated for C<sub>17</sub>H<sub>27</sub>NO<sub>6</sub>Na<sup>+</sup> [M+Na]<sup>+</sup> 364.1723, found: 364.1738.  $[\alpha]_D^{20} = +40.04$  (c = 1.15, CHCl<sub>3</sub>). SFC-MS (method 1): 94% ee:  $t_{ret.}$  (major) = 2.35 min. (96.9%),  $t_{ret.}$  (minor) = 5.20 min. (3.1%).

**(S,E)-4-((N-(4-methoxybenzyl)-3-oxobutanamido)methyl)hex-3-ene-1,2-diyl diacetate (3i)**

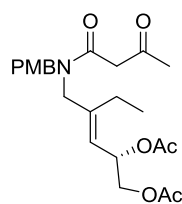

Isopropylidene protected diol **S20** (311 mg, 0.79 mmol, 1.0 equiv) was subjected to general procedure E and the crude material was purified by silica gel column chromatography (10% → 40% EtOAc/cHex), providing the pure title compound as a yellow oil in 73% yield (251 mg, 0.58 mmol) over 2 steps.  $R_f = 0.25$  (EtOAc/cHex = 3:7).  $^1\text{H NMR}$  (600 MHz, Chloroform- $d$ )  $\delta$  7.18 – 7.01 (m, 2H), 6.94 – 6.79 (m, 2H), 5.83 – 5.65 (m, 1H), 5.29 – 4.87 (m, 1H), 4.59 – 4.35 (m, 1H), 4.30 (d,  $J = 5.2$  Hz, 1H), 4.18 – 4.08 (m, 1H), 4.08 – 3.95 (m, 2H), 3.81 – 3.76 (m, 4H), 3.71 (d,  $J = 1.7$  Hz, 1H), 3.60 (s, 1H), 3.45 (s, 1H), 2.28 – 2.24 (m, 2H), 2.24 – 2.12 (m, 1H), 2.08 – 2.04 (m, 7H), 1.92 (s, 1H), 1.07 – 0.97 (m, 3H).  $^{13}\text{C NMR}$  (151 MHz,  $\text{CDCl}_3$ )  $\delta$  202.34, 175.88, 175.50, 172.47, 170.75, 170.27, 167.58, 167.20, 159.36, 159.23, 159.13, 144.09, 143.20, 142.35, 129.65, 128.85, 127.95, 127.78, 127.70, 121.02, 119.05, 114.52, 114.15, 87.08, 68.48, 68.47, 65.22, 65.12, 55.36, 50.94, 50.10, 49.77, 48.81, 48.32, 47.62, 30.49, 22.82, 22.42, 21.25, 21.20, 13.25. Multiple rotameric signals were observed. **IR (neat):**  $\nu_{\text{max}}$  ( $\text{cm}^{-1}$ ): 2966, 1733, 1637, 1612, 1585, 1512, 1488, 1421, 1367, 1238, 1174, 1157, 1031. **HRMS (ESI):**  $m/z$  calculated for  $\text{C}_{23}\text{H}_{32}\text{NO}_7$   $[\text{M}+\text{H}]^+ = 434.2173$ , found = 434.2176.  $[\alpha]_D^{20} = +17.3$  ( $c = 1.85$ ,  $\text{CHCl}_3$ ). **SFC-MS (method 3):** 90% ee:  $t_{\text{ret.}}$  (major) = 6.40 min. (95%),  $t_{\text{ret.}}$  (minor) = 5.81 min. (5%).

**(S,E)-4-((3-ethoxy-N-(4-methoxybenzyl)-3-oxopropanamido)methyl)hex-3-ene-1,2-diyl diacetate (3j)**

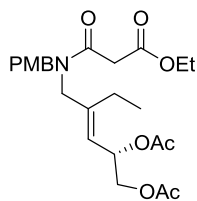

Isopropylidene protected diol **S21** (1.0 g, 2.38 mmol, 1.0 equiv) was subjected to general procedure E and the crude material was purified by silica gel column chromatography (30% → 40% EtOAc/cHex), providing the pure title compound as a yellow oil in 61% yield (676 mg, 1.46 mmol) over 2 steps.  $R_f = 0.35$  (EtOAc/cHex = 3:7).  $^1\text{H NMR}$  (600 MHz,  $\text{CDCl}_3$ )  $\delta$  7.23 – 7.04 (m, 2H), 6.90 – 6.80 (m, 2H), 5.84 – 5.68 (m, 1H), 5.13 – 5.05 (m, 1H), 4.49 (s, 1H), 4.35 (s, 1H), 4.23 – 4.11 (m, 3H), 4.09 – 3.96 (m, 2H), 3.82 – 3.77 (m, 3H), 3.74 (s, 1H), 3.51 (s, 1H), 3.37 (d,  $J = 2.6$  Hz, 1H), 2.27 – 2.16 (m, 1H), 2.09 – 2.03 (m, 7H), 1.32 – 1.22 (m, 3H), 1.09 – 0.96 (m, 3H).  $^{13}\text{C NMR}$  (151 MHz,  $\text{CDCl}_3$ )  $\delta$  170.82, 170.80, 170.32, 170.23, 167.66, 167.07, 166.65, 159.40, 159.24, 143.36, 142.24, 137.23, 132.12, 129.70, 129.23, 128.90, 127.68, 127.48, 121.20, 119.21, 114.53, 114.13, 68.55, 68.48, 65.26, 65.18, 61.67, 55.47, 55.40, 50.94, 49.85, 48.77, 48.32, 43.20, 41.53, 41.16, 22.84, 22.37, 21.27, 21.22, 20.91, 14.26, 13.36, 13.30. Multiple rotameric signals were observed. **IR (neat):**  $\nu_{\text{max}}$  ( $\text{cm}^{-1}$ ): 2972, 1731, 1643, 1512, 1442, 1369, 1303, 1244, 1218, 1174, 1031, 746. **HRMS (ESI):**  $m/z$  calculated for  $\text{C}_{24}\text{H}_{34}\text{NO}_8$   $[\text{M}+\text{H}]^+ = 464.2279$ , found = 464.2283.  $[\alpha]_D^{20} = +14.86$  ( $c = 1.48$ ,  $\text{CHCl}_3$ ). **SFC-MS (method 2):** 92% ee:  $t_{\text{ret.}}$  (major) = 5.33 min. (96%),  $t_{\text{ret.}}$  (minor) = 6.11 min. (4%).

**(S,E)-4-((N-(4-methoxybenzyl)-2-(phenylsulfonyl)acetamido)methyl)hex-3-ene-1,2-diyl diacetate (3k)**

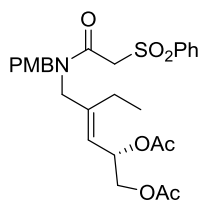

Isopropylidene protected diol **S22** (739 mg, 1.52 mmol, 1.0 equiv) was subjected to general procedure E and the crude material was purified by silica gel column chromatography (30% → 50% EtOAc/cHex), providing the pure title compound as a yellow oil in 87% yield (701 mg, 1.32 mmol) over 2 steps.  $R_f = 0.30$  (EtOAc/cHex = 2:3).  $^1\text{H NMR}$  (600 MHz,  $\text{CDCl}_3$ )  $\delta$  7.95 – 7.84 (m, 2H), 7.72 – 7.65 (m, 1H), 7.61 – 7.52 (m, 2H), 7.10 (dd,  $J = 63.5, 8.6$  Hz, 2H), 6.90 – 6.83 (m, 2H), 5.83 – 5.69 (m, 1H), 5.14 (dd,  $J = 158.0, 9.0$  Hz, 1H), 4.62 (s, 1H), 4.48 – 4.40 (m, 1H), 4.25 – 4.19 (m, 1H), 4.16 – 4.06 (m, 2H), 4.04 – 3.96 (m, 3H), 3.80 (d,  $J = 3.4$  Hz, 3H), 2.21 (dt,  $J = 14.1, 7.9$  Hz, 1H), 2.10 – 2.06 (m, 3H), 2.06 – 2.04 (m, 4H), 1.03 (dt,  $J = 14.9, 7.6$  Hz, 3H).  $^{13}\text{C NMR}$  (151 MHz,  $\text{CDCl}_3$ )  $\delta$  170.90, 170.73, 170.22, 162.39, 162.09, 159.50, 159.36, 142.72, 142.47, 138.91, 134.38, 134.36, 129.69, 129.27, 128.66, 128.60, 128.40, 127.59, 127.43, 120.74, 119.31, 114.69, 114.20, 68.49, 68.30, 65.26, 65.05, 60.06, 60.01, 55.48, 55.43, 51.26, 50.44, 49.55, 49.11, 22.91, 22.53, 21.31, 21.20, 20.89, 13.31. Multiple rotameric signals were observed. **IR (neat)**:  $\nu_{\text{max}}$  ( $\text{cm}^{-1}$ ): 2972, 1737, 1265, 1245, 1224, 1157, 730. **HRMS (ESI)**:  $m/z$  calculated for  $\text{C}_{27}\text{H}_{34}\text{NO}_8\text{S}[\text{M}+\text{H}]^+$  = 532.2000, found = 532.1998.  $[\alpha]_D^{20} = +14.13$  ( $c = 2.69$ ,  $\text{CHCl}_3$ ). **SFC-MS (method 1)**: 94% ee:  $t_{\text{ret.}}$  (major) = 8.79 min. (97%),  $t_{\text{ret.}}$  (minor) = 7.64 min. (3%).

**(S,E)-5-((N-(4-methoxybenzyl)-3-oxobutanamido)pent-3-ene-1,2-diyl diacetate (3l)**

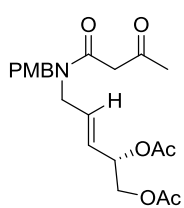

Acetal **S24** (177 mg, 0.44 mmol, 1.0 equiv) was subjected to general procedure E. After purification of the crude material by silica gel column chromatography (10% → 60% EtOAc/cHex), the title compound was obtained as a yellow oil in 68% yield (120 mg, 0.30 mmol) over 2 steps.  $R_f = 0.1$  (EtOAc/cHex = 1:2).  $^1\text{H NMR}$  (500 MHz,  $\text{CDCl}_3$ )  $\delta$  7.18 – 7.00 (m, 2H), 6.89 – 6.79 (m, 2H), 5.76 – 5.61 (m, 1H), 5.57 – 5.41 (m, 2H), 4.55 – 4.44 (m, 2H), 4.35 (s, 1H), 4.20 – 4.13 (m, 1H), 4.06 – 3.95 (m, 2H), 3.79 – 3.75 (m, 4H), 3.58 – 3.48 (m, 2H), 2.34 – 2.21 (m, 2H), 2.08 – 2.02 (m, 6H). Multiple rotameric and keto-enol signals were observed.  $^{13}\text{C NMR}$  (126 MHz,  $\text{CDCl}_3$ )  $\delta$  202.43, 175.74, 172.21, 170.66, 170.04, 166.96, 159.32, 159.13, 129.70, 129.57, 129.21, 129.13, 129.09, 128.79, 127.90, 127.81, 127.73, 127.46, 127.25, 127.10, 126.70, 114.44, 114.27, 114.09, 114.03, 87.04, 71.22, 71.12, 64.82, 64.70, 55.39, 55.32, 50.54, 49.92, 49.51, 48.41, 47.93, 47.66, 47.50, 46.53, 46.07, 30.53, 30.48, 21.15, 21.10, 20.85. **IR (neat)**:  $\nu_{\text{max}}$  ( $\text{cm}^{-1}$ ): 2937, 1737, 1637, 1612, 1585, 1512, 1448, 1440, 1421, 1365, 1301, 1218, 1174, 1159, 1110, 1031, 975, 948. **HRMS (ESI)**:  $m/z$  calculated for  $\text{C}_{21}\text{H}_{28}\text{NO}_7^+$  ( $[\text{M}+\text{H}]^+$ ) = 406.1860, found = 406.1873.  $[\alpha]_D^{20} = +21.88$  ( $c = 1.92$ ,  $\text{CHCl}_3$ ).

**(S,E)-9-ethoxy-4-methyl-7,9-dioxonon-3-ene-1,2-diyl diacetate (3m)**

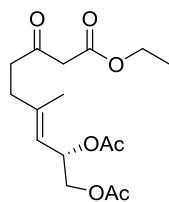

Isopropylidene protected diol **S27** (360 mg, 1.27 mmol, 1.0 equiv) was subjected to general procedure E and the crude material was purified by silica gel column chromatography (10% → 20% EtOAc/cHex), providing the pure title compound as a yellow oil in 64% yield (267 mg, 0.81 mmol) over 2 steps.  $R_f = 0.60$  (EtOAc/cHex = 1:1).  $^1\text{H NMR}$  (600 MHz,  $\text{CDCl}_3$ )  $\delta$  5.74 (dddd,  $J = 15.2, 12.3, 7.6, 3.6$  Hz, 1H), 5.14 (m, 1H), 4.23 – 4.12 (m, 3H), 4.04 (ddd,  $J = 11.9, 7.8, 4.5$  Hz, 1H), 3.45 (s, 2H), 2.73 – 2.61 (m, 2H), 2.37 – 2.13 (m, 2H), 2.08 (s, 6H), 1.79 (s, 3H), 1.29 (t,  $J = 6.9, 3.4$  Hz, 3H).  $^{13}\text{C NMR}$  (151 MHz,  $\text{CDCl}_3$ )  $\delta$  201.65, 171.79, 170.67, 170.15, 142.85, 141.27, 135.78, 123.22, 119.49, 118.82, 88.16, 77.16, 71.33, 68.98, 65.06, 63.87, 61.37, 60.67, 49.27, 42.81, 40.90, 37.64, 33.08, 31.66, 25.80, 21.08, 17.04, 14.08. **IR (neat)**:  $\nu_{\text{max}}$  ( $\text{cm}^{-1}$ ): 2979, 1731, 1440, 1369, 1218, 1164, 1093, 960, 865, 605, 470. **HRMS (ESI)**:  $m/z$  calculated for  $\text{C}_{16}\text{H}_{24}\text{O}_7\text{Na}$   $[\text{M}+\text{Na}]^+ = 351.1402$ , found = 351.1414.  $[\alpha]_D^{20} = +18$  ( $c = 2.66$ ,  $\text{CHCl}_3$ ).

**(S,Z)-5-(N-(4-methoxybenzyl)-3-oxobutanamido)-4-methylpent-3-ene-1,2-diyl diacetate (Z-3a)**

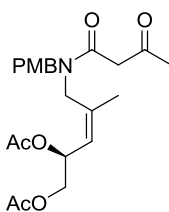

Acetal **S28** (550 mg, 1.33 mmol, 1.0 equiv) was subjected to general procedure E, furnishing the pure title compound as a yellow oil in 69% yield (387 mg, 0.92 mmol) over 2 steps after purification by silica gel column chromatography (20% → 40% EtOAc/cHex).  $R_f = 0.35$  (EtOAc/cHex = 2:3).  $^1\text{H NMR}$  (600 MHz,  $\text{CDCl}_3$ )  $\delta$  7.25 – 7.07 (m, 2H), 6.91 – 6.72 (m, 2H), 5.58 – 5.41 (m, 1H), 5.32 – 5.25 (m, 1H), 4.47 – 4.26 (m, 2H), 4.14 – 3.95 (m, 3H), 3.80 (s, 2H), 3.78 (s, 1H), 3.68 – 3.52 (m, 2H), 2.29 (s, 1H), 2.24 (s, 2H), 2.09 – 1.95 (m, 6H), 1.80 – 1.65 (m, 3H). Multiple rotameric and keto-enol signals were observed.  $^{13}\text{C NMR}$  (151 MHz,  $\text{CDCl}_3$ )  $\delta$  202.61, 202.45, 170.66, 170.20, 170.10, 167.65, 159.34, 159.17, 138.97, 138.10, 129.52, 128.72, 127.94, 127.88, 127.53, 123.94, 123.70, 123.52, 122.83, 114.59, 114.35, 114.20, 114.17, 68.40, 68.28, 68.11, 68.05, 65.09, 65.00, 64.91, 55.43, 55.38, 50.17, 50.06, 49.93, 49.35, 48.46, 47.94, 47.88, 47.09, 45.42, 44.69, 30.58, 21.42, 21.15, 21.09, 20.87, 20.82. **IR (neat)**:  $\nu_{\text{max}}$  ( $\text{cm}^{-1}$ ): 2947, 1735, 1637, 1512, 1438, 1367, 1240, 1220, 1176, 1031, 945. **HRMS (ESI)**:  $m/z$  calculated for  $\text{C}_{22}\text{H}_{29}\text{NO}_7\text{Na}^+$  ( $[\text{M}+\text{Na}]^+$ ) = 442.1849, found = 442.1836.  $[\alpha]_D^{20} = +17.78$  ( $c = 0.9$ ,  $\text{CHCl}_3$ ).

## Vinylcyclopropanes

### (1*R*,5*S*,6*R*)-1-acetyl-3-(4-methoxybenzyl)-5-methyl-6-vinyl-3-azabicyclo[3.1.0]hexan-2-one (5a)

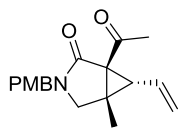

Allylic acetate **3a** (109 mg, 0.26 mmol, 1.0 equiv) was used in general procedure G. The reaction mixture was concentrated under reduced pressure to give the crude product as a 9:1 mixture of diastereomers as judged by  $^1\text{H}$  NMR. The crude material was purified by silica gel column chromatography (30% EtOAc/cHex) providing the title compound as a slightly yellow oil in 75% yield (53 mg, 0.19 mmol). **0.65 mmol scale experiment:** allylic acetate **3a** (274 mg, 0.65 mmol, 1.0 equiv) was used in general procedure G. The reaction mixture was concentrated and the crude material was purified by silica gel column chromatography (30% EtOAc/cHex) providing the title compound as a slightly yellow oil in 71% yield (137 mg, 0.46 mmol).  $R_f = 0.6$  (EtOAc/cHex = 1:1).  $^1\text{H}$  NMR (500 MHz,  $\text{CDCl}_3$ )  $\delta$  7.23 – 7.18 (m, 2H), 6.89 – 6.85 (m, 2H), 5.36 – 5.07 (m, 3H), 4.45 – 4.24 (m, 2H), 3.81 (s, 3H), 3.23 – 3.15 (m, 2H), 2.79 – 2.74 (m, 1H), 2.52 (s, 3H), 1.27 (s, 3H).  $^{13}\text{C}$  NMR (126 MHz,  $\text{CDCl}_3$ )  $\delta$  201.85, 169.91, 159.63, 130.42, 129.21, 128.26, 121.17, 114.42, 55.64, 50.25, 46.13, 39.79, 38.90, 31.30, 30.04, 16.16. IR (neat):  $\nu_{\text{max}}$  ( $\text{cm}^{-1}$ ): 2923, 1685, 1514, 1442, 1419, 1357, 1247, 1215, 1176, 1033. HRMS (ESI): calculated for  $\text{C}_{18}\text{H}_{21}\text{NO}_3\text{Na}$  ( $[\text{M}+\text{Na}]^+$ ) = 322.1314, found = 322.1398.  $[\alpha]_D^{20} = +84.9$  ( $c = 1.06$ ,  $\text{CHCl}_3$ ). SFC-MS (method 2): 90% ee:  $t_{\text{ret}}$ . (major enantiomer) = 5.61 min. (95%),  $t_{\text{ret}}$ . (minor enantiomer) = 6.21 min. (5%).

### 1.0 mmol scale experiment

### (1*R*,5*S*,6*R*)-1-acetyl-3-(4-methoxybenzyl)-5-methyl-6-vinyl-3-azabicyclo[3.1.0]hexan-2-one (5a)

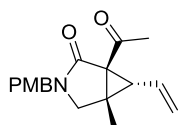

Allylic acetate **3a** (420 mg, 1.00 mmol, 1.0 equiv) was used in general procedure G. The reaction mixture was concentrated under reduced pressure to give the crude product as a 9:1 mixture of diastereomers as judged by  $^1\text{H}$  NMR. The crude material was purified by silica gel column chromatography (30% EtOAc/cHex) providing the title compound as a slightly yellow oil in 62% yield (185 mg, 0.62 mmol). SFC-MS (method 2): 88% ee:  $t_{\text{ret}}$ . (major enantiomer) = 5.59 min. (94%),  $t_{\text{ret}}$ . (minor enantiomer) = 6.20 min. (6%), e.s. = 97% (based on **3a** in 91% ee).

**(1R,5S,6R)-3-(4-methoxybenzyl)-5-methyl-1-((E)-1-(2-(3-nitrophenyl)hydrazineylidene)ethyl)-6-vinyl-3-azabicyclo[3.1.0]hexan-2-one (7)**

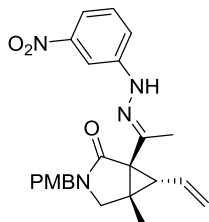

Vinylcyclopropane **5a** (30 mg, 0.1 mmol, 1.0 equiv) was dissolved in EtOH (2.0 mL). Next, 3-nitrophenylhydrazine hydrochloride (18 mg, 0.095 mmol, 0.95 equiv) was added and the reaction mixture was stirred for 3 h at room temperature. The reaction mixture was filtered and the yellow precipitate was concentrated under reduced pressure to afford the pure title compound (44 mg, 0.1 mmol) in quantitative yield.  $R_F = 0.7$  (EtOAc/cHex = 3:7).  $^1\text{H NMR}$  (500 MHz, MeOD)  $\delta$  7.97 – 7.95 (m, 1H), 7.61 – 7.56 (m, 1H), 7.47 – 7.42 (m, 1H), 7.42 – 7.36 (m, 1H), 7.29 – 7.20 (m, 2H), 6.98 – 6.87 (m, 2H), 5.44 – 5.36 (m, 1H), 5.32 – 5.21 (m, 1H), 5.14 – 5.10 (m, 1H), 4.45 – 4.30 (m, 2H), 3.80 (s, 3H), 3.39 – 3.35 (m, 1H), 3.30 – 3.26 (m, 1H), 2.62 (d,  $J = 8.1$  Hz, 1H), 2.04 (s, 3H), 1.23 (s, 3H).  $^{13}\text{C NMR}$  (126 MHz, MeOD)  $\delta$  173.98, 160.91, 150.57, 148.83, 141.65, 131.47, 131.11, 130.82, 129.42, 121.02, 120.02, 119.50, 115.09, 114.21, 107.86, 55.70, 51.55, 51.07, 35.67, 34.21, 16.89, 16.35. **HRMS (ESI)**: calculated for  $\text{C}_{24}\text{H}_{27}\text{N}_4\text{O}_4$  ( $[\text{M}+\text{H}]^+$ ) = 435.2027, found = 435.2045.  $[\alpha]_D^{20} = +7.69$  ( $c = 0.5$ , MeOH).

**(1R,5S,6S)-1-acetyl-3-(4-methoxybenzyl)-5-methyl-6-vinyl-3-azabicyclo[3.1.0]hexan-2-one (5a')**

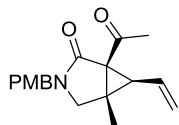

$R_F = 0.7$  (EtOAc/cHex = 1:1).  $^1\text{H NMR}$  (600 MHz,  $\text{CDCl}_3$ )  $\delta$  7.17 – 7.13 (m, 2H), 6.89 – 6.84 (m, 2H), 6.02 – 5.92 (m, 1H), 5.26 – 5.11 (m, 2H), 4.34 (dd,  $J = 98.0, 14.5$  Hz, 2H), 3.81 (s, 3H), 3.25 – 3.15 (m, 2H), 2.55 (s, 3H), 2.01 (d,  $J = 9.6$  Hz, 1H), 1.40 (s, 3H).  $^{13}\text{C NMR}$  (151 MHz,  $\text{CDCl}_3$ )  $\delta$  202.46, 171.67, 159.38, 135.73, 135.19, 130.18, 129.79, 129.68, 128.46, 124.99, 120.95, 119.24, 114.34, 66.64, 57.42, 55.44, 53.69, 50.07, 47.09, 45.95, 44.17, 34.21, 31.84, 29.85, 11.93. **HRMS (ESI)**: calculated for  $\text{C}_{18}\text{H}_{22}\text{NO}_3$  ( $[\text{M}+\text{H}]^+$ ) = 300.1594, found = 300.1595.  $[\alpha]_D^{20} = +100$  ( $c = 0.3$ ,  $\text{CHCl}_3$ ).

**(1S,5R,6R)-3-(4-methoxybenzyl)-5-methyl-1-(phenylsulfonyl)-6-vinyl-3-azabicyclo[3.1.0]hexan-2-one (5b)**

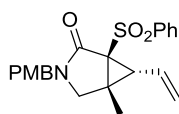

Prepared from precursor **3b** (176 mg, 0.34 mmol, 1.0 equiv), according to general procedure G. Purification of the crude material by silica gel column chromatography (15%  $\rightarrow$  35% EtOAc/cHex) afforded the title compound as a yellow oil in 75% yield (101 mg, 0.26 mmol).  $R_F = 0.30$  (EtOAc/cHex = 3:7).  $^1\text{H NMR}$  (600 MHz,  $\text{CDCl}_3$ )  $\delta$  8.09 – 8.00 (m, 2H), 7.70 – 7.62 (m, 1H), 7.62 – 7.51 (m, 2H), 7.07 – 6.98 (m, 2H), 6.84 – 6.74 (m, 2H), 5.38 – 5.27 (m, 1H), 5.16 – 5.03 (m, 2H), 4.24 (q,  $J = 14.4$  Hz, 2H), 3.78 (s, 3H), 3.16 – 3.04 (m, 2H), 2.92 (d,  $J = 7.6$  Hz, 1H), 1.72 (s, 3H).  $^{13}\text{C NMR}$  (151 MHz,  $\text{CDCl}_3$ )  $\delta$  164.78, 159.43, 140.37, 133.75, 130.03, 128.84, 127.40, 127.35, 122.18, 114.18, 56.15, 55.40, 49.19, 45.87, 38.20, 36.80, 16.96. **IR (neat)**:  $\nu_{\text{max}}$  ( $\text{cm}^{-1}$ ): 2929, 2839, 1689, 1610, 1512, 1481, 1446, 1419, 1305, 1288, 1245, 1218, 1201, 1176, 1147, 1108, 1087, 1072, 1029, 991, 968, 926. **HRMS (ESI)**:  $m/z$  calculated for  $\text{C}_{22}\text{H}_{24}\text{NO}_4\text{S}^+$   $[\text{M}+\text{H}]^+$  398.1421, found: 398.1407.  $[\alpha]_D^{20} = +104.94$  ( $c = 1.62$ ,  $\text{CHCl}_3$ ). **SFC-MS (method 1)**: 89% ee:  $t_{\text{ret}}$  (major) = 6.61 min. (94.6%),  $t_{\text{ret}}$  (minor) = 6.47 min. (5.4%).

**(1*R*,5*S*,6*R*)-1-benzoyl-3-(4-methoxybenzyl)-5-methyl-6-vinyl-3-azabicyclo[3.1.0]hexan-2-one (5c)**

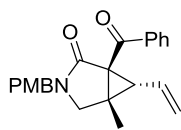

Prepared from precursor **3c** (88 mg, 0.18 mmol, 1.0 equiv), according to general procedure G. Purification of the crude material by silica gel column chromatography (5% → 45% EtOAc/cHex) afforded the title compound as a yellow oil in 65% yield (43 mg, 0.12 mmol).  $R_f = 0.30$  (EtOAc/cHex = 1:4).  $^1\text{H NMR}$  (500 MHz,  $\text{CDCl}_3$ )  $\delta$  7.74 – 7.67 (m, 2H), 7.60 – 7.54 (m, 1H), 7.47 – 7.39 (m, 2H), 7.30 – 7.24 (m, 2H), 6.98 – 6.86 (m, 2H), 5.47 (dd,  $J = 16.9, 1.8$  Hz, 1H), 5.40 – 5.31 (m, 1H), 5.24 (dd,  $J = 10.4, 1.9$  Hz, 1H), 4.37 (dd,  $J = 340.4, 14.3$  Hz, 2H), 3.85 (s, 3H), 3.39 (dd,  $J = 51.4, 11.2$  Hz, 2H), 2.78 (d,  $J = 7.9$  Hz, 1H), 1.24 (s, 3H).  $^{13}\text{C NMR}$  (126 MHz,  $\text{CDCl}_3$ )  $\delta$  194.16, 169.92, 159.48, 137.71, 133.17, 130.32, 129.16, 128.62, 121.09, 114.23, 55.47, 50.14, 49.53, 45.78, 36.05, 35.17, 17.21. **IR (neat)**:  $\nu_{\text{max}}$  ( $\text{cm}^{-1}$ ): 2930, 1679, 1610, 1512, 1448, 1419, 1340, 1303, 1245, 1218, 1203, 1176, 1109, 1032, 916. **HRMS (ESI)**:  $m/z$  calculated for  $\text{C}_{23}\text{H}_{23}\text{NO}_3\text{Na}^+$  [ $\text{M}+\text{Na}$ ] $^+$  384.1570, found: 384.1564.  $[\alpha]_D^{20} = -16.22$  ( $c = 1.11, \text{CHCl}_3$ ). **SFC-MS (method 2)**: 96% ee:  $t_{\text{ret}}$ . (major) = 5.46 min. (98.3%),  $t_{\text{ret}}$ . (minor) = 8.44 min. (1.7%).

**ethyl (1*S*,5*S*,6*R*)-3-(4-methoxybenzyl)-5-methyl-2-oxo-6-vinyl-3-azabicyclo[3.1.0]hexane-1-carboxylate (5d)**

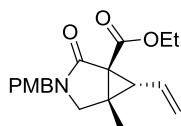

Prepared from precursor **3d** (107 mg, 0.24 mmol, 1.0 equiv), according to general procedure G. Purification of the crude material by silica gel column chromatography (30% EtOAc/cHex) afforded the title compound as a yellow oil in 60% yield (48 mg, 0.15 mmol).  $R_f = 0.42$  (EtOAc/cHex = 2:3).  $^1\text{H NMR}$  (300 MHz,  $\text{CDCl}_3$ )  $\delta$  7.22 – 7.11 (m, 2H), 6.90 – 6.80 (m, 2H), 5.39 – 5.27 (m, 1H), 5.22 – 5.06 (m, 2H), 4.39 – 4.18 (m, 4H), 3.79 (s, 3H), 3.21 – 3.07 (m, 2H), 2.65 – 2.58 (m, 1H), 1.35 – 1.24 (m, 6H).  $^{13}\text{C NMR}$  (126 MHz,  $\text{CDCl}_3$ )  $\delta$  167.84, 167.44, 159.31, 130.48, 130.29, 129.79, 128.86, 128.02, 120.97, 119.10, 114.20, 114.07, 61.65, 61.34, 55.39, 53.56, 49.73, 45.84, 43.32, 40.42, 37.52, 35.04, 16.68, 14.48, 12.22. **IR (neat)**:  $\nu_{\text{max}}$  ( $\text{cm}^{-1}$ ): 2952, 2360, 1733, 1693, 1647, 1612, 1512, 1440, 1245, 1174, 1031. **HRMS (ESI)**:  $m/z$  calculated for  $\text{C}_{19}\text{H}_{23}\text{NO}_4\text{Na}^+$  [ $\text{M}+\text{Na}$ ] $^+$  352.1519, found: 352.1508.  $[\alpha]_D^{20} = +89.3$  ( $c = 1.03, \text{CHCl}_3$ ). **SFC-MS (method 2)**: 93% ee:  $t_{\text{ret}}$ . (major) = 5.88 min. (96.5%),  $t_{\text{ret}}$ . (minor) = 7.08 min. (3.5%).

**(1*S*,3*aS*,6*aS*)-3-hydroxy-5-(4-methoxybenzyl)-6*a*-methyl-3-(trifluoromethyl)-1-vinylhexahydro-4*H*-furo[3,4-*c*]pyrrol-4-one (11)**

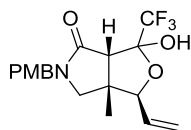

Precursor **3f** (524 mg, 1.1 mmol, 1.0 equiv) was dissolved in anhydrous toluene (8 mL) and subsequently DBU (328  $\mu\text{L}$ , 2.2 mmol, 2.0 equiv) and  $\text{Pd}(\text{PPh}_3)_4$  (127 mg, 0.11 mmol, 0.1 equiv) were added. The reaction mixture was stirred overnight at 80 °C. Purification of the crude material by silica gel column chromatography (10% → 30% EtOAc/cHex) afforded the title compound as a yellow oil in 20% yield (73 mg, 0.21 mmol).  $R_f = 0.46$  (EtOAc/cHex = 3:7).  $^1\text{H NMR}$  (500 MHz,  $\text{CDCl}_3$ )  $\delta$  7.19 – 7.13 (m, 2H), 6.93 – 6.87 (m, 2H), 6.28 (s, 1H), 5.74 (ddd,  $J = 17.5, 10.3, 7.5$  Hz, 1H), 5.33 – 5.07 (m, 2H), 4.44 (dd,  $J = 199.1, 14.4$  Hz, 2H), 4.15 (d,  $J = 7.3$  Hz, 1H), 3.81 (d,  $J = 1.2$  Hz, 3H), 3.11 (s, 1H), 3.07 – 2.86 (m, 1H), 1.59 (s, 3H), 1.12 (s, 3H).  $^{13}\text{C NMR}$  (126 MHz,  $\text{CDCl}_3$ )  $\delta$  171.35, 159.63, 131.12, 129.81, 126.91, 121.81 (q,  $J = 285.6$  Hz), 120.63, 114.46, 100.54 (q,  $J = 34.5$  Hz), 86.74, 57.45, 55.45, 51.92, 47.99, 46.48, 29.83, 18.11. **IR (neat)**:  $\nu_{\text{max}}$  ( $\text{cm}^{-1}$ ): 2921, 1666, 1612, 1514, 1458, 1269, 1245, 1172, 1143, 1049, 1031, 1002, 939. **HRMS (ESI)**:  $m/z$  calculated for  $\text{C}_{18}\text{H}_{21}\text{NO}_4\text{F}_3^+$  [ $\text{M}+\text{H}$ ] $^+$  372.1417, found: 372.1421.  $[\alpha]_D^{20} = -4.35$  ( $c = 1.15, \text{CHCl}_3$ ).



### (1*R*,5*S*,6*R*)-1-acetyl-3,5-dimethyl-6-vinyl-3-azabicyclo[3.1.0]hexan-2-one (5g)

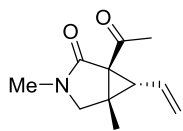

Precursor **3g** (80 mg, 0.25 mmol, 1.0 equiv) was subjected to general procedure G. The crude material was purified by silica gel column chromatography (1% → 4% MeOH/CH<sub>2</sub>Cl<sub>2</sub>) providing the title compound as a yellow oil in 68% yield (33 mg, 0.17 mmol).  $R_f = 0.3$  (MeOH/CH<sub>2</sub>Cl<sub>2</sub> = 2:98). <sup>1</sup>H NMR (600 MHz, CDCl<sub>3</sub>) δ 5.43 – 5.34 (m, 1H), 5.31 – 5.20 (m, 2H), 3.32 (dd,  $J = 67.9, 10.9$  Hz, 2H), 2.82 (s, 3H), 2.78 (d,  $J = 7.1$  Hz, 1H), 2.49 (s, 3H), 1.32 (s, 3H). <sup>13</sup>C NMR (151 MHz, CDCl<sub>3</sub>) δ 201.66 (C<sub>q</sub>), 170.04 (C<sub>q</sub>), 129.06 (CH), 121.04 (CH<sub>2</sub>), 52.77 (CH<sub>2</sub>), 39.20 (CH), 30.72 (CH<sub>3</sub>), 28.98 (CH<sub>3</sub>), 15.88 (CH<sub>3</sub>). IR (neat):  $\nu_{max}$  (cm<sup>-1</sup>): 2923, 1677, 1639, 1494, 1431, 1402, 1358, 1339, 1215, 1182, 1093, 1045, 916. HRMS (ESI): calculated for C<sub>11</sub>H<sub>16</sub>NO<sub>2</sub> ([M+H]<sup>+</sup>) = 194.1176, found = 194.1179.  $[\alpha]_D^{20} = +46.15$  ( $c = 1.04$ , CHCl<sub>3</sub>). SFC-MS (method 2): 89% ee:  $t_{ret.}$  (major) = 4.66 min. (94.6%),  $t_{ret.}$  (minor) = 5.43 min. (5.4%).

### (1*R*,5*S*,6*R*)-1-acetyl-3-isopropyl-5-methyl-6-vinyl-3-azabicyclo[3.1.0]hexan-2-one (5h)

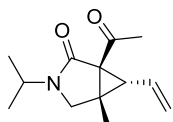

Precursor **3h** (93 mg, 0.27 mmol, 1.0 equiv) was subjected to general procedure F. The crude material was purified by silica gel column chromatography (15% → 65% EtOAc/cHex) providing the title compound as a yellow oil in 69% yield (20 mg, 0.09 mmol) based on recovered starting material (48 mg, 0.14 mmol, 52%). Diastereomeric ratio = 10 : 1 as indicated by <sup>1</sup>H NMR.  $R_f = 0.30$  (major) and 0.35 (minor) (EtOAc/cHex = 3:7). <sup>1</sup>H NMR (500 MHz, CDCl<sub>3</sub>) δ 5.43 – 5.33 (m, 2H), 5.24 – 5.19 (m, 1H), 4.41 – 4.32 (m, 1H), 3.28 (dd,  $J = 35.6, 10.6$  Hz, 2H), 2.78 – 2.74 (m, 1H), 2.48 (s, 3H), 1.32 (s, 3H), 1.18 (d,  $J = 6.8$  Hz, 3H), 1.09 (d,  $J = 6.8$  Hz, 3H). <sup>13</sup>C NMR (151 MHz, CDCl<sub>3</sub>) δ 201.90, 172.21, 171.61, 170.72, 170.05, 169.84, 169.06, 136.81, 136.33, 136.13, 134.44, 134.30, 133.28, 132.91, 132.78, 132.70, 132.22, 132.01, 129.09, 125.44, 125.37, 125.19, 125.14, 124.60, 124.11, 123.64, 121.02, 119.23, 119.05, 117.60, 117.14, 116.24, 115.91, 103.76, 85.68, 84.10, 81.46, 68.03, 67.61, 67.59, 65.47, 63.70, 62.02, 49.85, 48.93, 45.58, 45.42, 42.93, 42.82, 39.01, 31.58, 30.76, 30.34, 30.29, 29.85. IR (neat):  $\nu_{max}$  (cm<sup>-1</sup>): 2974, 2927, 1747, 1672, 1643, 1481, 1427, 1359, 1338, 1240, 1228, 1209, 1184, 1163, 1126, 1091, 1054. HRMS (ESI):  $m/z$  calculated for C<sub>13</sub>H<sub>19</sub>NO<sub>2</sub>Na<sup>+</sup>[M+Na]<sup>+</sup> 244.1303, found: 244.1320.  $[\alpha]_D^{20} = +113.33$  ( $c = 0.8$ , CHCl<sub>3</sub>). SFC-MS (method 2): 89% ee:  $t_{ret.}$  (major) = 4.65 min. (94.7%),  $t_{ret.}$  (minor) = 8.69 min. (5.3%).

### (1*R*,5*S*,6*R*)-1-acetyl-5-ethyl-3-(4-methoxybenzyl)-6-vinyl-3-azabicyclo[3.1.0]hexan-2-one (5i)

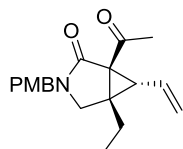

Allylic acetate **3i** (102 mg, 0.24 mmol, 1.0 equiv) was used in general procedure G. The reaction mixture was concentrated under reduced pressure to give the crude product as a 9:1 mixture of diastereomers as judged by <sup>1</sup>H NMR. The crude material was purified by silica gel column chromatography (0% → 30% EtOAc/cHex) providing the title compound as a yellow oil in 41% yield (23 mg, 0.07 mmol) based on recovered starting material (23 mg, 0.05 mmol, 21%).  $R_f = 0.50$  (EtOAc/cHex = 3:7). <sup>1</sup>H NMR (600 MHz, CDCl<sub>3</sub>) δ 7.20 (d,  $J = 8.6$  Hz, 2H), 6.91 – 6.82 (m, 2H), 5.33 – 5.29 (m, 1H), 5.21 – 5.06 (m, 2H), 4.36 (dd,  $J = 75.4, 14.3$  Hz, 2H), 3.80 (s, 3H), 3.20 (dd,  $J = 101.3, 10.9$  Hz, 2H), 2.80 (d,  $J = 7.8$  Hz, 1H), 2.53 (s, 3H), 1.66 – 1.47 (m, 2H), 0.85 (t,  $J = 7.4$  Hz, 3H). <sup>13</sup>C NMR (151 MHz, CDCl<sub>3</sub>) δ 201.61, 169.78, 159.42, 130.12, 129.69, 129.24, 128.09, 120.76, 114.22, 55.42, 47.71, 46.00, 44.46, 44.02, 39.07, 30.69, 23.15, 11.30. IR (neat):  $\nu_{max}$  (cm<sup>-1</sup>): 2987, 1679, 1512, 2358, 1215, 1174, 746. HRMS (ESI):  $m/z$  calculated for C<sub>19</sub>H<sub>24</sub>NO<sub>3</sub> [M+H]<sup>+</sup> = 314.1751, found = 314.1760.  $[\alpha]_D^{20} = +63.49$  ( $c = 1.26$ , CHCl<sub>3</sub>). SFC-MS (method 4): 88% ee:  $t_{ret.}$  (major) = 6.76 min. (94%),  $t_{ret.}$  (minor) = 6.63 min. (6%).

**(1*S*,5*R*,6*S*)-1-acetyl-3-(4-methoxybenzyl)-5-methyl-6-vinyl-3-azabicyclo[3.1.0]hexan-2-one (*ent*-5a)**

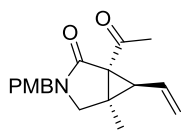

Upon submission of precursor **Z-3a** (109 mg, 0.26 mmol, 1.0 equiv) to general procedure G, no full conversion of starting material was observed over the course of 8 h. Silica gel column chromatography (5% → 40% EtOAc/cHex) provided the title compound as a yellow oil (40 mg, 0.13 mmol, 50%) and recovered starting material (20 mg, 0.05 mmol, 20%).  $R_f = 0.6$  (EtOAc/cHex = 1:1).  $^1\text{H NMR}$  (600 MHz,  $\text{CDCl}_3$ )  $\delta$  7.21 – 7.19 (m, 2H), 6.89 – 6.85 (m, 2H), 5.34 – 5.30 (m, 1H), 5.19 – 5.09 (m, 2H), 4.35 (dd,  $J = 99.3, 14.3$  Hz, 2H), 3.80 (s, 3H), 3.19 (q,  $J = 11.0$  Hz, 2H), 2.76 (d,  $J = 7.8$  Hz, 1H), 2.51 (s, 3H), 1.27 (s, 3H).  $^{13}\text{C NMR}$  (151 MHz,  $\text{CDCl}_3$ )  $\delta$  201.61, 169.70, 159.45, 150.02, 130.21, 129.03, 128.08, 120.94, 114.23, 55.43, 50.06, 45.93, 39.56, 38.67, 30.77, 15.96. **IR (neat)**:  $\nu_{\text{max}}$  ( $\text{cm}^{-1}$ ): 2923, 1676, 1610, 1512, 1483, 1440, 1419, 1357, 1336, 1303, 1244, 1215, 1174, 1108, 1031, 991. **HRMS (ESI)**:  $m/z$  calculated for  $\text{C}_{18}\text{H}_{22}\text{NO}_3^+$  ( $[\text{M}+\text{H}]^+$ ) = 300.1594, found = 300.1597.  $[\alpha]_D^{20} = -82.5$  ( $c = 0.8, \text{CHCl}_3$ ).

## Vinylcyclopropane rearrangement

### (1*R*,5*S*,6*R*)-1-acetyl-3-(4-methoxybenzyl)-5-methyl-6-((*E*)-styryl)-3-azabicyclo[3.1.0]hexan-2-one (**14**)

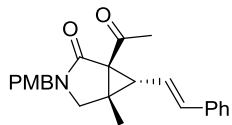

Vinylcyclopropane **5a** (50 mg, 0.12 mmol, 1.0 equiv) and styrene (41  $\mu$ L, 0.36 mmol, 3.0 equiv) were dissolved in anhydrous  $\text{CH}_2\text{Cl}_2$  (2 mL). The solution was degassed with argon followed by the addition of Grubbs II generation catalyst (100  $\mu$ g, 0.01 mmol, 0.1 equiv). The reaction mixture was heated to reflux and was stirred for 16

h, after which TLC analysis indicated complete conversion. The reaction mixture was concentrated under reduced pressure and the crude material was purified by silica gel column chromatography (20% EtOAc/cHex), providing the pure product as an off-white solid in 44% yield (26 mg, 0.05 mmol).  $R_f$  = 0.3 (EtOAc/cHex = 3:7).  $^1\text{H NMR}$  (600 MHz,  $\text{CDCl}_3$ )  $\delta$  7.33 – 7.19 (m, 5H), 6.95 (dd,  $J$  = 91.9, 7.8 Hz, 4H), 6.65 (d,  $J$  = 15.7 Hz, 1H), 5.46 (dd,  $J$  = 15.7, 8.8 Hz, 1H), 4.43 (dd,  $J$  = 387.1, 14.2 Hz, 2H), 3.83 (s, 3H), 3.36 (dd,  $J$  = 32.7, 10.7 Hz, 2H), 2.96 (d,  $J$  = 8.8 Hz, 1H), 2.59 (s, 3H), 1.38 (s, 3H).  $^{13}\text{C NMR}$  (151 MHz,  $\text{CDCl}_3$ )  $\delta$  201.63, 169.50, 159.44, 136.53, 135.84, 130.42, 128.49, 128.21, 127.75, 126.29, 120.43, 114.42, 55.34, 50.22, 46.12, 40.16, 39.27, 30.83, 16.11. **IR (neat)**:  $\nu_{\text{max}}$  ( $\text{cm}^{-1}$ ): 2820, 2181, 1743, 1674, 1510, 1446, 1269, 1242, 1199, 1176, 966. **HRMS (ESI)**: calculated for  $\text{C}_{24}\text{H}_{26}\text{NO}_3$  ( $[\text{M}+\text{H}]^+$ ) = 376.1907, found = 376.1905.  $[\alpha]_D^{20}$  = + 165.4 ( $c$  = 1.33,  $\text{CHCl}_3$ ). m.p.: 102 – 105  $^\circ\text{C}$ .

### (3*aS*,6*R*,6*aR*)-6a-acetyl-2-(4-methoxybenzyl)-3a-methyl-6-phenyl-3,3a,6,6a-tetrahydrocyclopenta[*c*]pyrrol-1(2*H*)-one (**15**)

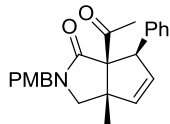

To a solution of styrylcyclopropane **14** (26 mg, 0.1 mmol, 1.0 equiv) and  $\text{SnCl}_4$  (13.2  $\mu$ L, 0.11 mmol, 1.1 equiv) in anhydrous  $\text{CH}_2\text{Cl}_2$  (2 mL) were added freshly dried 4  $\text{\AA}$  MS (50 mg). The reaction mixture was heated to reflux and was stirred for 2 h, after which TLC

analysis indicated complete conversion. The reaction mixture was poured into a sat. aq.  $\text{NaHCO}_3$  solution at 0  $^\circ\text{C}$  which was subsequently transferred to a separation funnel. The phases were separated and the aqueous phase was extracted 3x with  $\text{CH}_2\text{Cl}_2$ . The organics were combined and washed with brine, dried ( $\text{Na}_2\text{SO}_4$ ) and concentrated under reduced pressure. The crude material was purified by silica gel column chromatography (50% EtOAc/cHex), providing the pure cyclopentene as a grey solid in 58% yield (15 mg, 0.06 mmol).  $R_f$  = 0.6 (EtOAc/cHex = 1:1).  $^1\text{H NMR}$  (600 MHz,  $\text{CDCl}_3$ )  $\delta$  7.38 – 7.20 (m, 5H), 6.96 (dd,  $J$  = 135.9, 8.5 Hz, 4H), 5.75 (dd,  $J$  = 5.7, 2.7 Hz, 1H), 5.50 (d,  $J$  = 5.7 Hz, 1H), 4.74 (s, 1H), 4.43 (dd,  $J$  = 115.1, 14.7 Hz, 2H), 3.80 (s, 3H), 3.19 (dd,  $J$  = 119.9, 9.8 Hz, 2H), 1.95 (s, 3H), 1.51 (s, 3H).  $^{13}\text{C NMR}$  (151 MHz,  $\text{CDCl}_3$ )  $\delta$  204.69, 173.28, 159.23, 140.00, 137.24, 132.79, 129.32, 129.15, 128.78, 127.97, 127.43, 114.22, 58.22, 56.00, 55.40, 52.62, 46.57, 30.71, 21.42. **IR (neat)**:  $\nu_{\text{max}}$  ( $\text{cm}^{-1}$ ): 2920, 1681, 1512, 1440, 1353, 1282, 1245, 1215, 1174, 1029. **HRMS (ESI)**: calculated for  $\text{C}_{24}\text{H}_{26}\text{NO}_3$  ( $[\text{M}+\text{H}]^+$ ) = 376.1907, found = 376.1905.  $[\alpha]_D^{20}$  = + 235.6 ( $c$  = 0.73,  $\text{CHCl}_3$ ). m.p.: 109 – 113  $^\circ\text{C}$ .

## Vinylcyclopropane cycloaddition

### (3*aS*,6*aS*)-3*a*-acetyl-5-(4-methoxybenzyl)-6*a*-methyl-3-phenyl-1-vinylhexahydro-4*H*-furo[3,4-*c*]pyrrol-4-one (**16**)

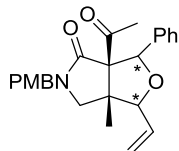

To vinylcyclopropane **5a** (100 mg, 0.35 mmol, 1.0 equiv) in anhydrous CH<sub>2</sub>Cl<sub>2</sub> (1 mL) was added Sn(OTf)<sub>2</sub> (32  $\mu$ L, 0.17 mmol, 0.5 equiv) and benzaldehyde (120  $\mu$ L, 1.05 mmol, 3.0 equiv). The reaction mixture was stirred overnight at room temperature. TLC analysis indicated complete conversion and the reaction mixture was concentrated. Column chromatography (20% EtOAc/cHex) provided **16a** (30 mg, 0.07 mmol, 21%) as a colorless oil and an inseparable mixture of **16b** and **16c** (30 mg, 0.07 mmol, 21%) as a colorless oil in a 4:3:1 ratio.

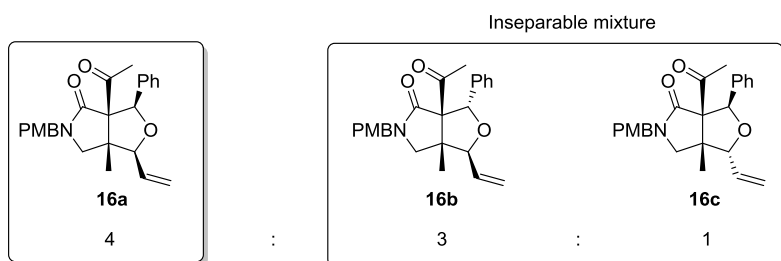

**16a:**  $R_f$  = 0.7 (EtOAc/cHex = 1:1). <sup>1</sup>H NMR (600 MHz, CDCl<sub>3</sub>)  $\delta$  7.55 (d,  $J$  = 7.8 Hz, 2H), 7.34 (t,  $J$  = 7.7 Hz, 2H), 7.29 – 7.27 (m, 1H), 7.26 – 7.23 (m, 2H), 6.93 – 6.86 (m, 2H), 5.89 (ddd,  $J$  = 17.5, 10.5, 7.2 Hz, 1H), 5.33 (s, 1H), 5.29 – 5.11 (m, 2H), 4.50 (dd,  $J$  = 108.5, 14.4 Hz, 2H), 3.81 (s, 3H), 3.04 (dd,  $J$  = 26.0, 10.6 Hz, 2H), 1.68 (s, 3H), 1.09 (s, 3H). <sup>13</sup>C NMR (151 MHz, CDCl<sub>3</sub>)  $\delta$  203.34, 173.25, 159.51, 138.38, 132.64, 129.91, 128.40, 127.99, 127.84, 126.90, 119.81, 114.39, 87.01, 85.02, 55.45, 53.03, 51.93, 46.61, 31.37, 17.02. IR (neat):  $\nu_{max}$  (cm<sup>-1</sup>): 2927, 2837, 1670, 1510, 1448, 1357, 1242, 1228, 1193, 1176, 966. HRMS (ESI): calculated for C<sub>25</sub>H<sub>28</sub>NO<sub>4</sub> ([M+H]<sup>+</sup>) = 406.2013, found = 406.1994.  $[\alpha]_D^{20}$  = + 45.71 (c = 0.7, CHCl<sub>3</sub>).

**16b:**  $R_f$  = 0.6 (EtOAc/cHex = 1:1). <sup>1</sup>H NMR (600 MHz, CDCl<sub>3</sub>)  $\delta$  7.34 – 7.04 (m, 5H), 7.13 – 6.73 (m, 4H), 6.06 (s, 1H), 6.03 – 5.94 (m, 1H), 5.30 – 5.18 (m, 2H), 4.39 – 4.22 (m, 3H), 3.80 (s, 3H), 3.19 (dd,  $J$  = 139.1, 9.9 Hz, 2H), 2.15 (s, 3H), 1.01 (s, 3H). <sup>13</sup>C NMR (151 MHz, CDCl<sub>3</sub>)  $\delta$  204.17, 159.43, 133.59, 131.81, 130.18, 129.96, 127.99, 127.78, 126.38, 119.65, 114.21, 89.73, 84.61, 56.93, 55.42, 46.42, 30.29, 18.25.

**16c:**  $R_f$  = 0.6 (EtOAc/cHex = 1:1). <sup>1</sup>H NMR (600 MHz, CDCl<sub>3</sub>)  $\delta$  7.34 – 7.03 (m, 5H), 6.95 (m, 4H), 5.80 – 5.73 (m, 2H), 5.49 – 5.30 (m, 2H), 4.16 – 4.08 (m, 1H), 3.80 (s, 3H), 3.11 (dd,  $J$  = 474.0, 9.9 Hz, 2H), 2.29 (s, 3H), 1.10 (s, 3H). <sup>13</sup>C NMR (151 MHz, CDCl<sub>3</sub>)  $\delta$  205.83, 170.20, 159.43, 137.21, 133.59, 131.81, 129.96, 129.14, 128.40, 127.30, 126.38, 119.97, 113.92, 89.73, 85.84, 84.61, 55.42, 52.57, 52.33, 30.99, 19.93.

**16b+16c:** IR (neat):  $\nu_{max}$  (cm<sup>-1</sup>): 2912, 1685, 1610, 1585, 1512, 1490, 1440, 1421, 1382, 1353, 1323, 1301, 1271, 1244, 1205, 1174, 1128, 1110, 1081, 1066, 1029, 993.

### NOESY analysis of 16a:

All relevant correlations are indicated by a red outline.

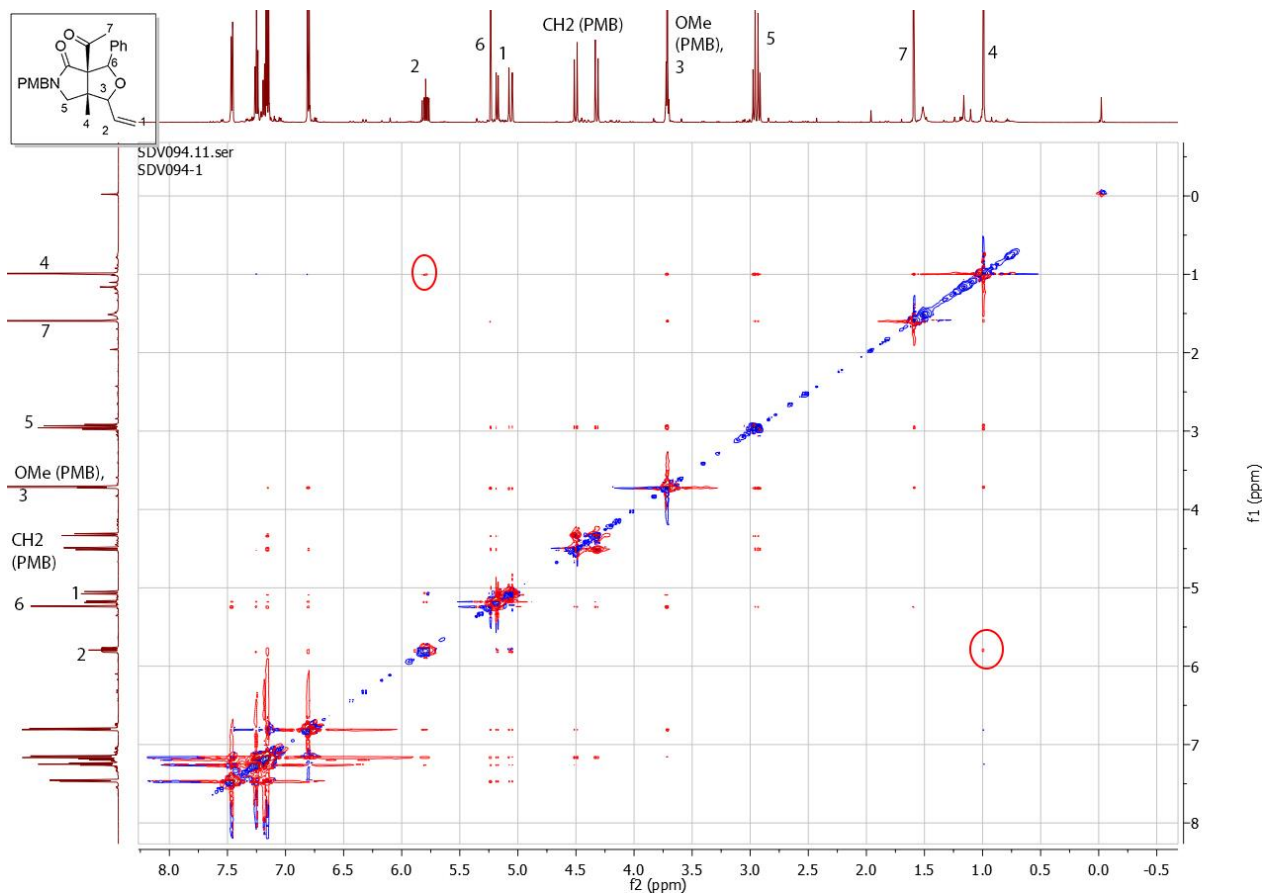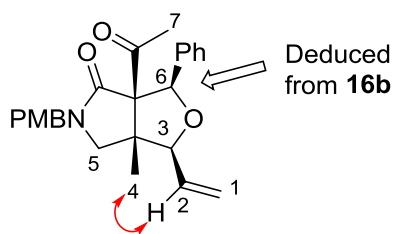

### NOESY analysis of 16b + 16c:

All relevant correlations are indicated by a red outline.

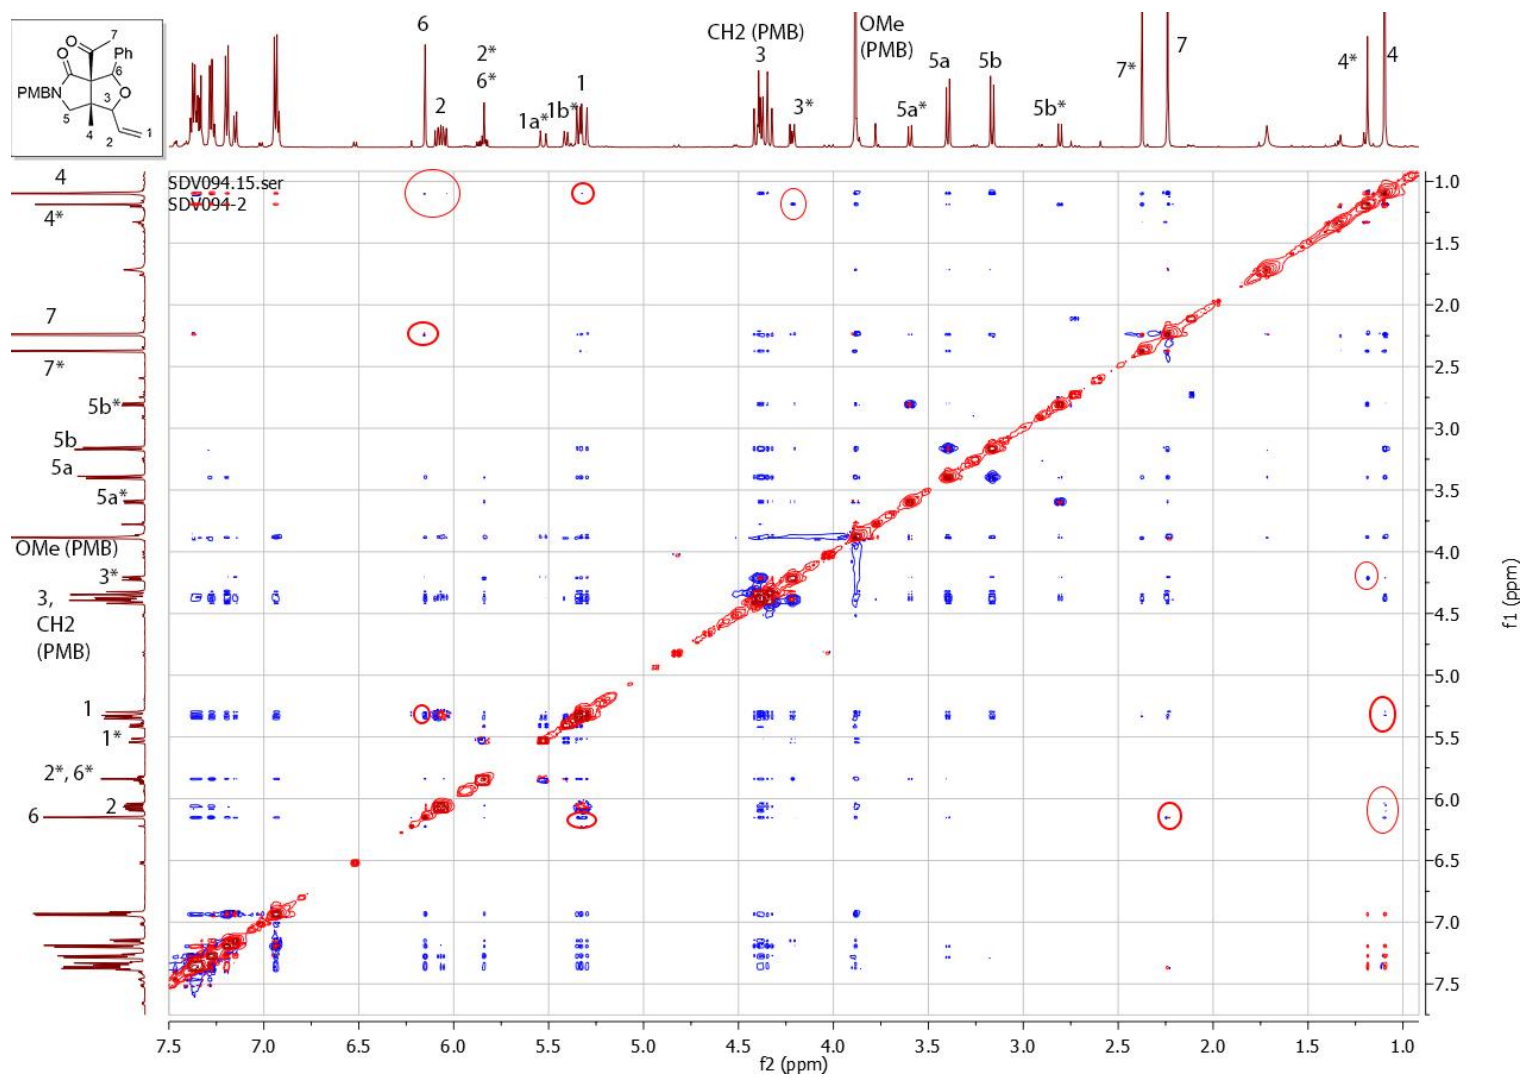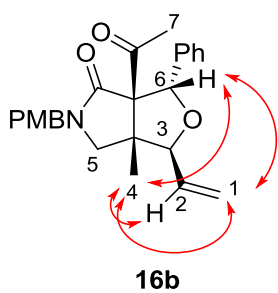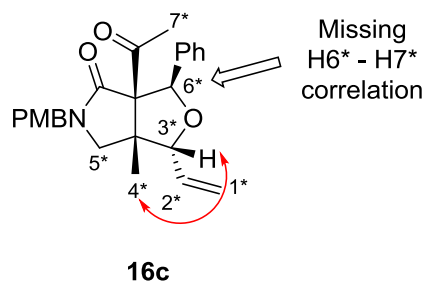

# NMR spectra

## Esters

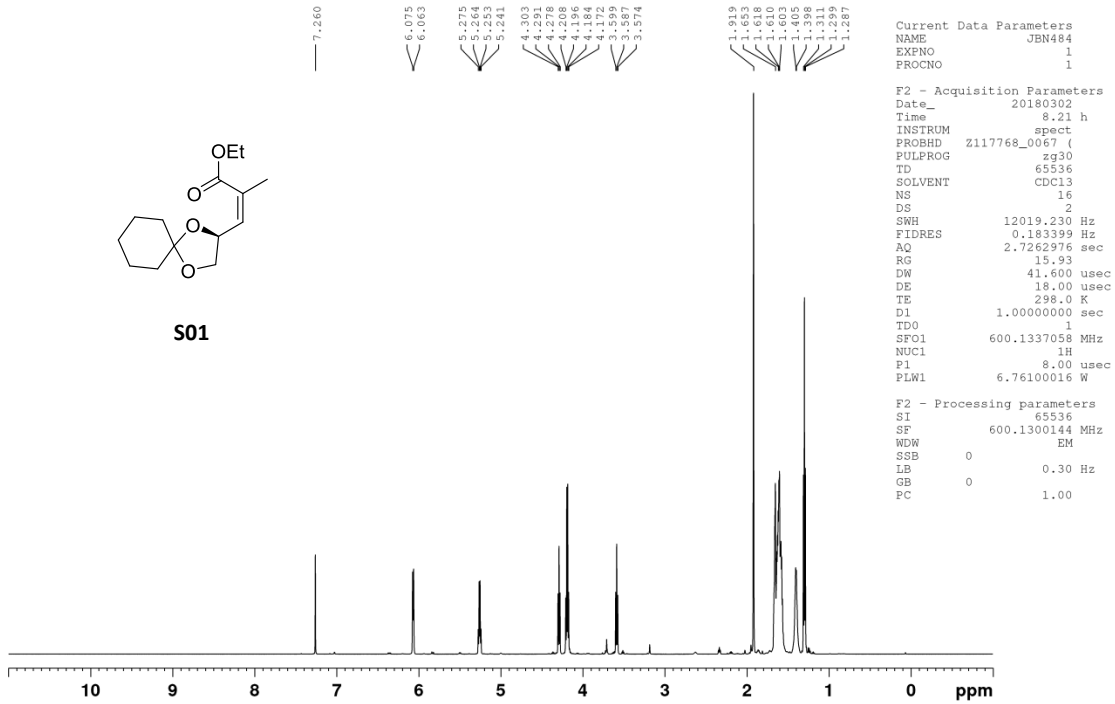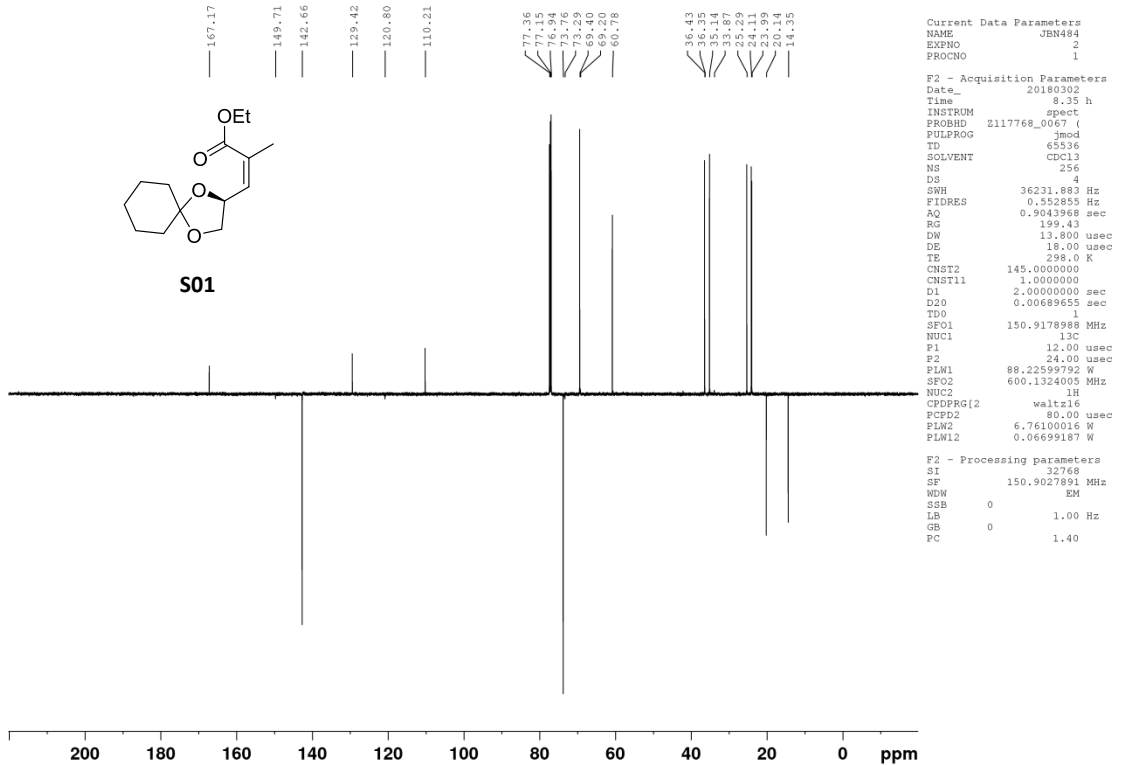

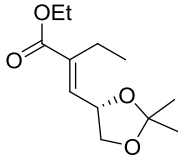

S02

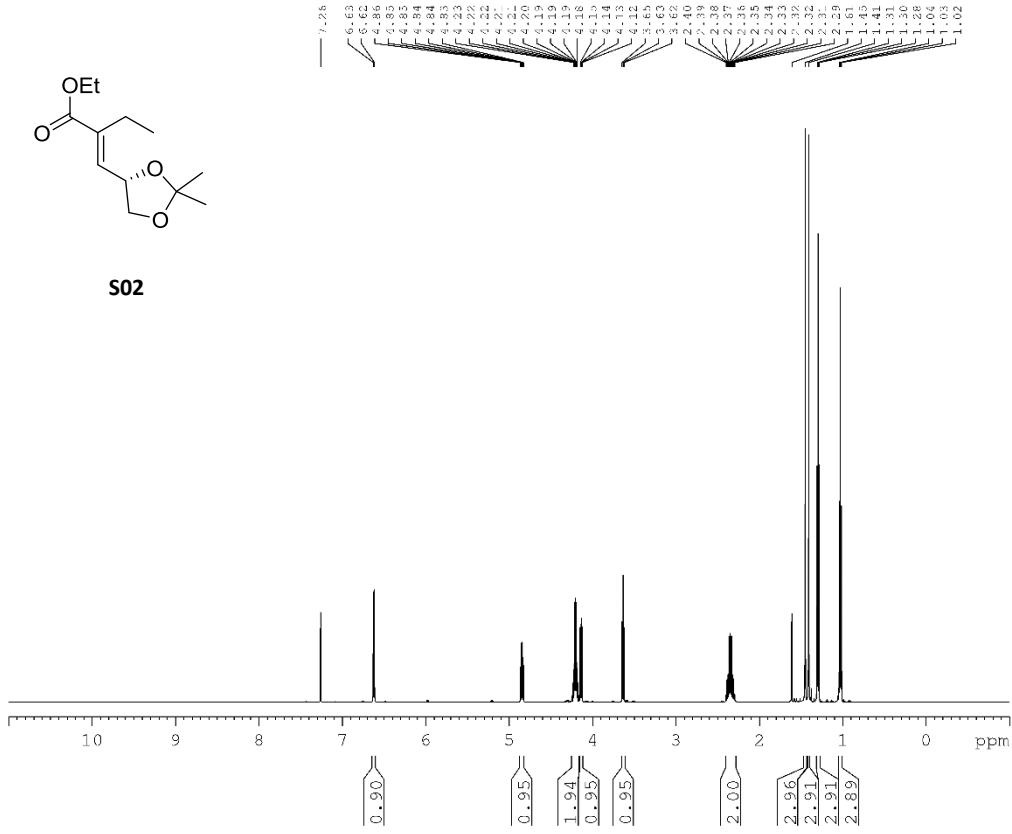

```

Current Data Parameters
NAME      JRM54
EXPNO    1
PROCNO   1
PROCPS   1
AQ       1
RG       2
SI       2
SF       2016.250 Hz
AQ       2.185598 Hz
RG       2.1212950 sec
SI       4.111
SF       41.800 MHz
RG       18.000 MHz
SF       298.2 K
RG       1.0000000 sec
SI       600.1337038 MHz
AQ       1H
RG       9.000 MHz
SF       5.76102016 Hz

F2 - Acquisition Parameters
Data_    20180906
Time     17.02 h
INSTRUM  spect
PROBHD   517760 QNP1
PULPROG  zgpg30
RG       65336
SOLVENT  CDCl3
SI       312
SF       4
SF       35231.880 Hz
RG       0.532650 Hz
AQ       0.3348368 sec
RG       289.42
SF       13.800 MHz
SF       298.2 K
RG       1.0000000 sec
SI       143.0000000
AQ       1.0000000
SF       2.0000000 MHz
AQ       0.06688600 sec
RG       100
SF01    100.6278988 MHz
RG       125
SF       12.000 MHz
SF       24.000 MHz
RF1      80.22539792 MHz
SF02    800.1337038 MHz
RG       18
RG       18
SFOFF(2)  941.116
SF02(2)  80.000 MHz
RF1(2)   8.76102016 MHz
RF1(2)   0.06695187 MHz

F2 - Processing parameters
SI       32768
SF       100.6278988 MHz
RG       18
SF       12.000 MHz
SF       24.000 MHz
RF1      80.22539792 MHz
RF1(2)   8.76102016 MHz
RF1(2)   0.06695187 MHz

```

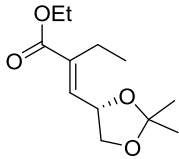

S02

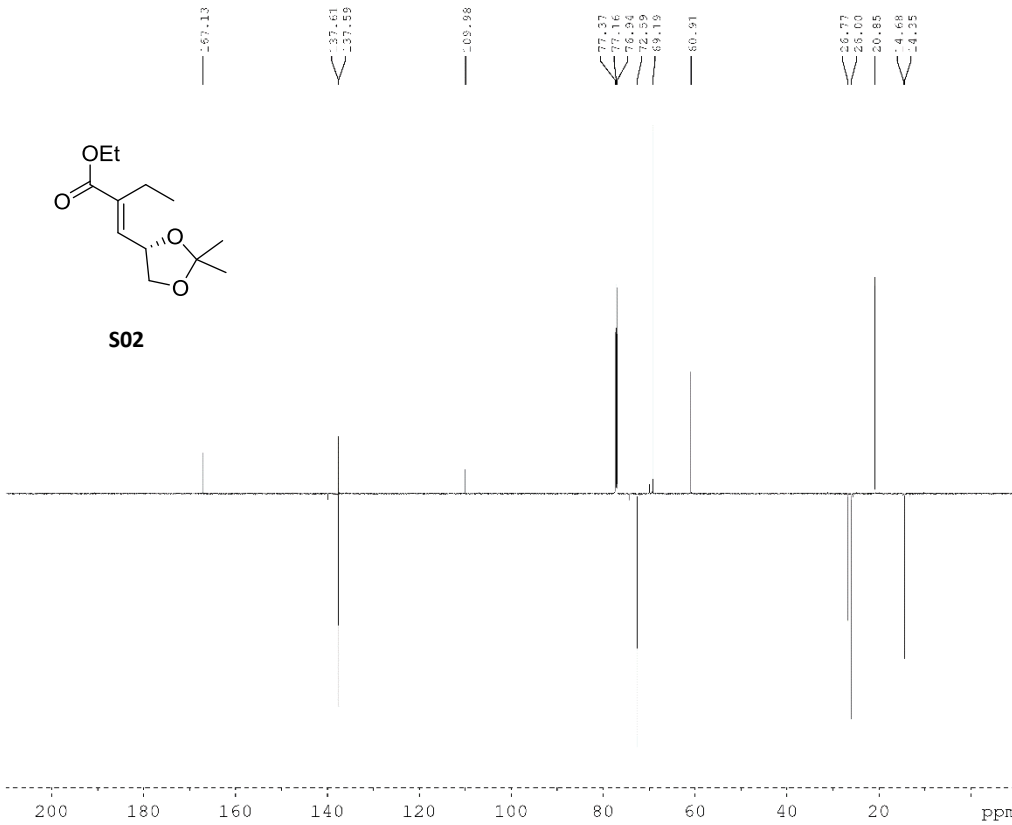

```

Current Data Parameters
NAME      JRM54
EXPNO    2
PROCNO   1
PROCPS   1
AQ       1
RG       2
SI       2
SF       2016.250 Hz
AQ       2.185598 Hz
RG       2.1212950 sec
SI       4.111
SF       41.800 MHz
RG       18.000 MHz
SF       298.2 K
RG       1.0000000 sec
SI       600.1337038 MHz
AQ       1H
RG       9.000 MHz
SF       5.76102016 Hz

F2 - Acquisition Parameters
Data_    20180906
Time     17.02 h
INSTRUM  spect
PROBHD   517760 QNP1
PULPROG  zgpg30
RG       65336
SOLVENT  CDCl3
SI       312
SF       4
SF       35231.880 Hz
RG       0.532650 Hz
AQ       0.3348368 sec
RG       289.42
SF       13.800 MHz
SF       298.2 K
RG       1.0000000 sec
SI       143.0000000
AQ       1.0000000
SF       2.0000000 MHz
AQ       0.06688600 sec
RG       100
SF01    100.6278988 MHz
RG       125
SF       12.000 MHz
SF       24.000 MHz
RF1      80.22539792 MHz
SF02    800.1337038 MHz
RG       18
RG       18
SFOFF(2)  941.116
SF02(2)  80.000 MHz
RF1(2)   8.76102016 MHz
RF1(2)   0.06695187 MHz

F2 - Processing parameters
SI       32768
SF       100.6278988 MHz
RG       18
SF       12.000 MHz
SF       24.000 MHz
RF1      80.22539792 MHz
RF1(2)   8.76102016 MHz
RF1(2)   0.06695187 MHz

```



# Alcohols

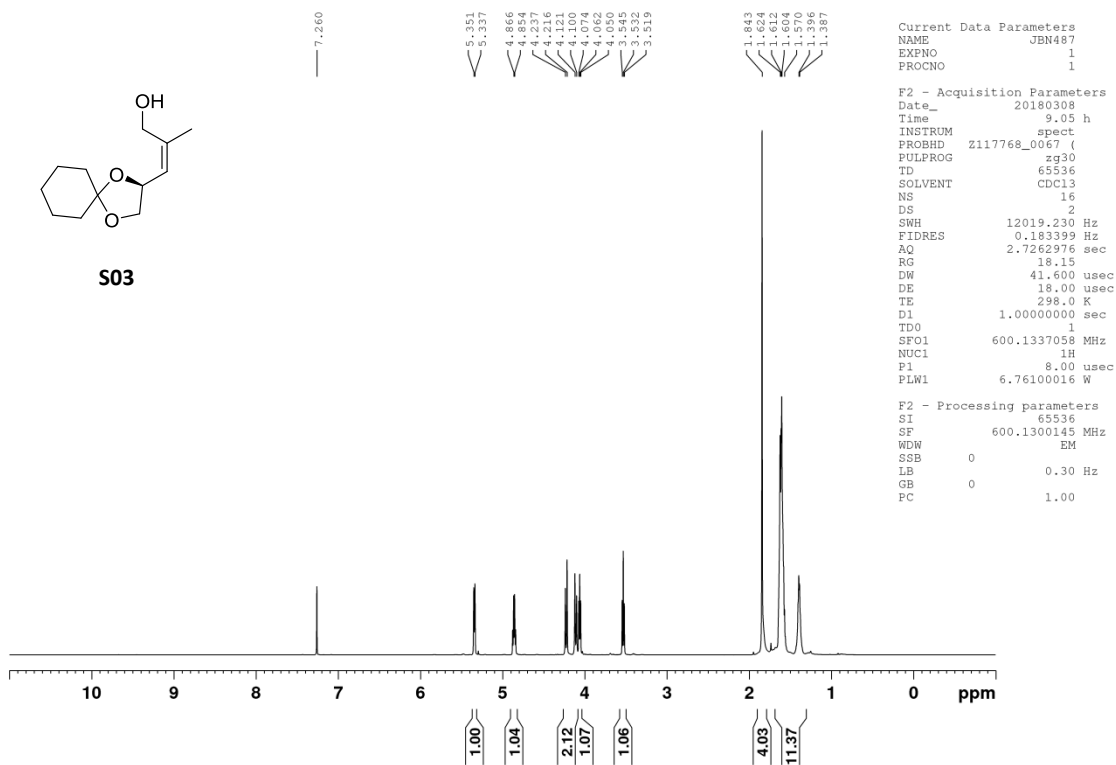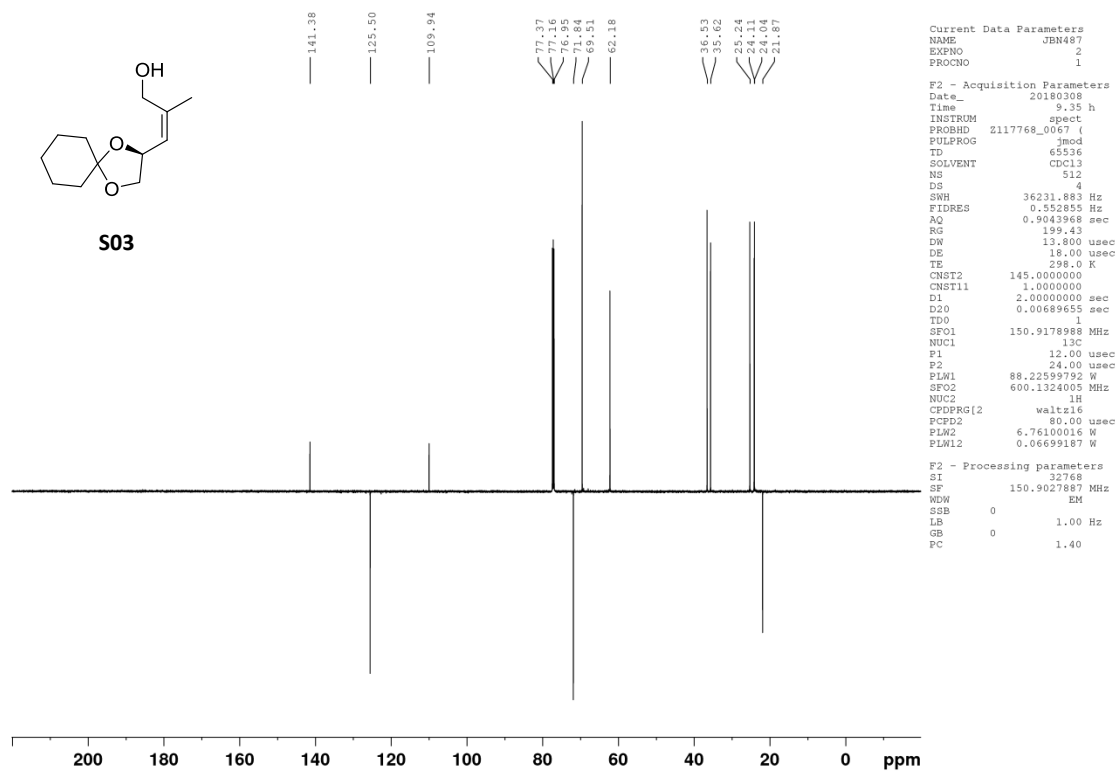

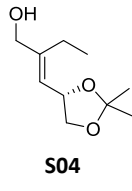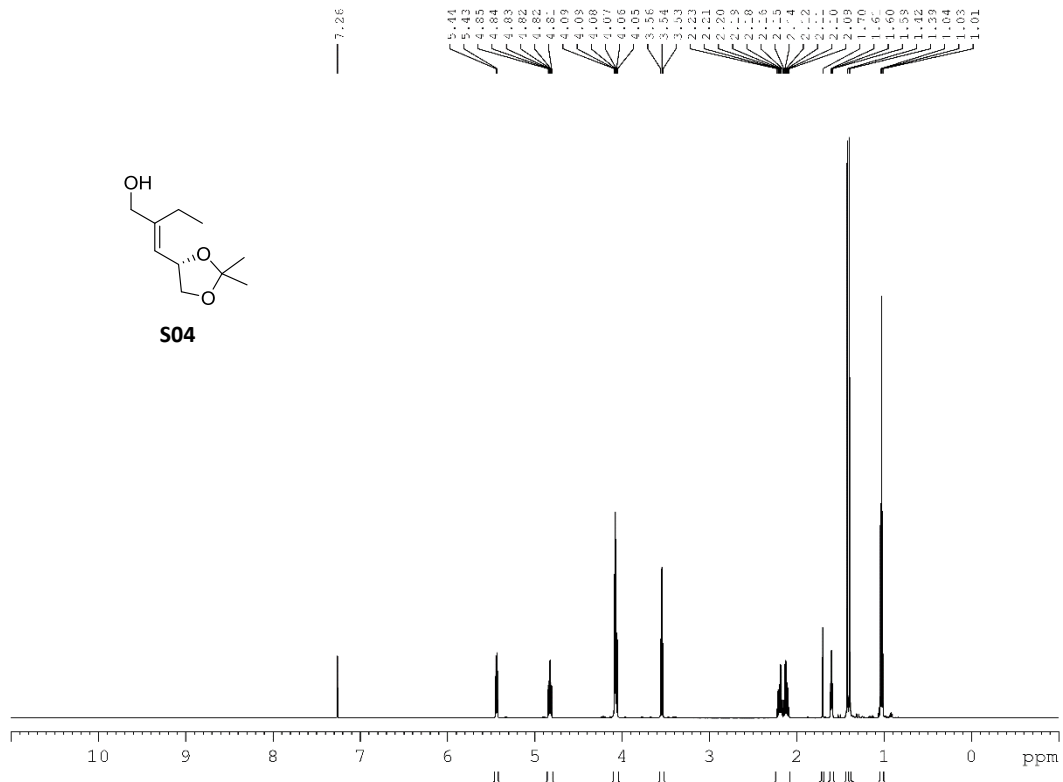

```

Current Data Parameters
NAME      JAK553
EXPNO    1
PROCNO   1

F2 Acquisition Parameters
Date_     20080910
Time     9:07:11
INSTRUM  spect
PROBHD   ZH17768_0067
PULPROG  zgpg30
TD       65536
SOLVENT  CDCl3
NS       2
DS       2
SWH      220.9250 MHz
F2RES    0.78399 Hz
AQ       2.7262976 sec
RG       15.93
WB       41.850 kHz
DS       18.00 kHz
IS       258.2 X
FIDRES   1.0000000 sec
AQ       1.0000000 sec
SFO1     600.137050 MHz
NUC1      13
PC       8.00 kHz
P1P1     6.9600016 sec

F2 - Processing parameters
SI       65536
SF       600.1300146 MHz
WDW      EM
SSB      0
GB       0.30 Hz
PC       0
EC       1.00
  
```

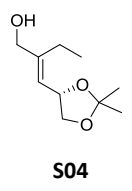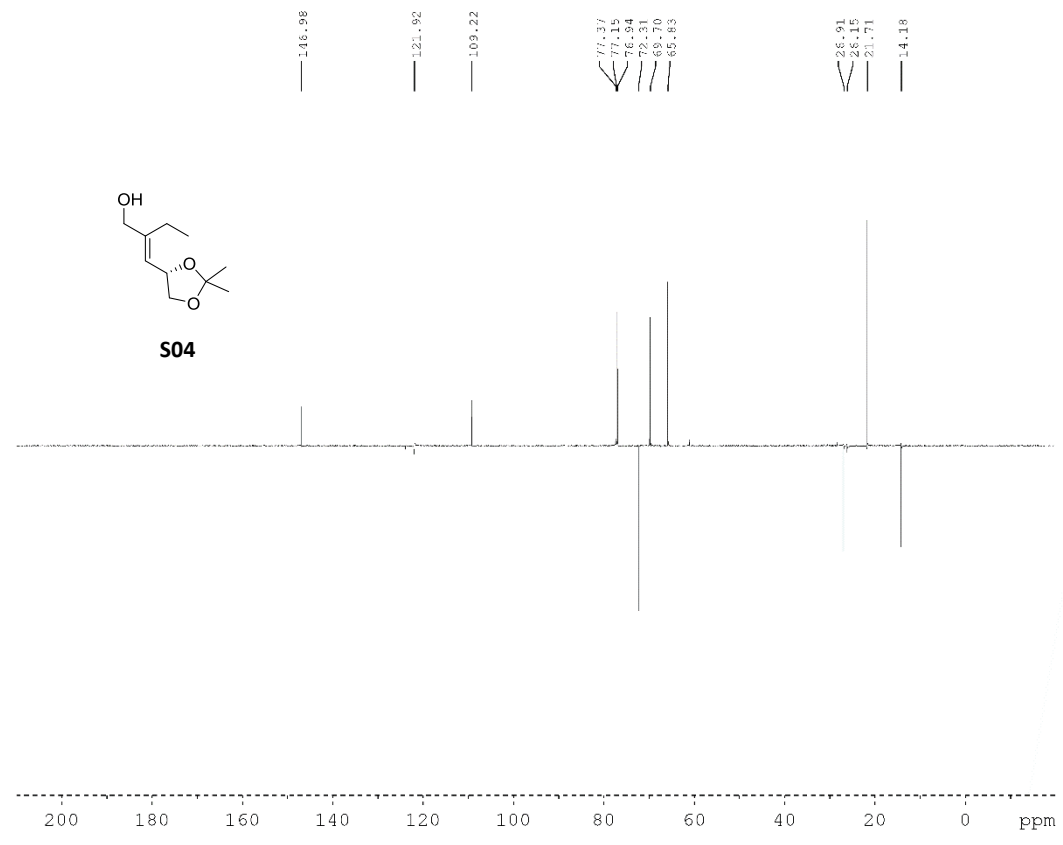

```

Current Data Parameters
NAME      JAK553
EXPNO    2
PROCNO   1

F2 Acquisition Parameters
Date_     20080910
Time     9:14:11
INSTRUM  spect
PROBHD   ZH17768_0067
PULPROG  zgpg30
TD       65536
SOLVENT  CDCl3
NS       512
DS       4
SWH      26731.880 MHz
F2RES    0.352853 Hz
AQ       0.9643968 sec
RG       199.43
WB       15.850 kHz
DS       18.00 kHz
IS       258.2 X
FIDRES   1.0000000 sec
AQ       1.0000000 sec
SFO1     125.769888 MHz
NUC1      13
PC       8.00 kHz
P1P1     6.9600016 sec
SFO2     600.1326053 MHz
NUC2      13
SFO3     600.1326053 MHz
PC2      8.00 kHz
P2P2     6.9600016 sec
P2P1     0.06899157 sec

F2 - Processing parameters
SI       65536
SF       125.7627926 MHz
WDW      EM
SSB      0
GB       0.30 Hz
PC       1.00 Hz
EC       1.40
  
```



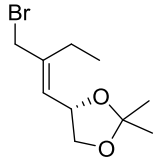

506

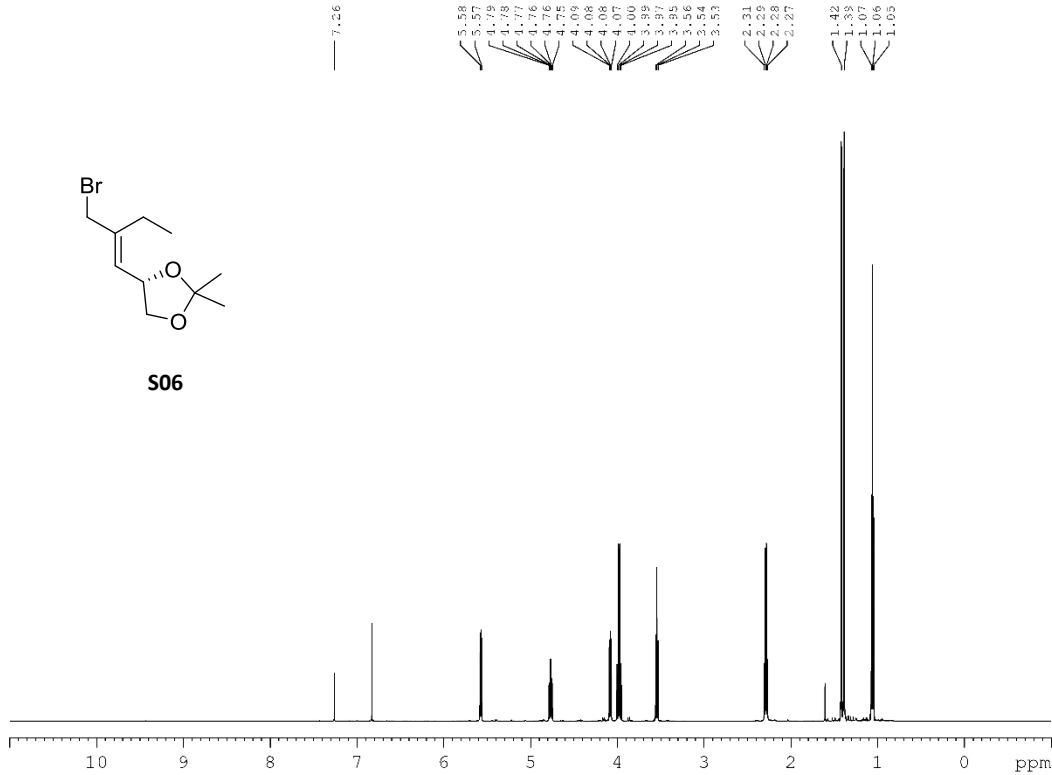

```

Current Data Parameters
NAME      JBR554
EXPNO    1
PROCNO   1

F2 - Acquisition Parameters
Date_    20180514
Time     09:00
INSTRUM  spect
PROBHD   Z117768 0067 1
PULPROG  zgpg30
TD        65536
SOLVENT  CDCl3
NS        16
DS        2
SWH       12015.230 Hz
FIDRES    0.185539 Hz
AQ        2.7282576 sec
RG         4.39
DM         4.600 usec
L2        50.00 usec
LS         290.1 K
F1        1.0000000 sec
TIC
SFO1      600.1337050 MHz
NUC1       1H
P1         8.00 usec
PCP1      6.7610016 W

F2 - Processing parameters
SI         65536
SF         600.1337050 MHz
AQ         2.7282576 sec
RG         4.39
DM         4.600 usec
L2        50.00 usec
LS         290.1 K
F1        1.0000000 sec
TIC
SFO1      600.1337050 MHz
NUC1       1H
P1         8.00 usec
PCP1      6.7610016 W
  
```

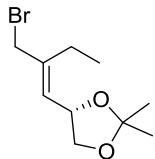

506

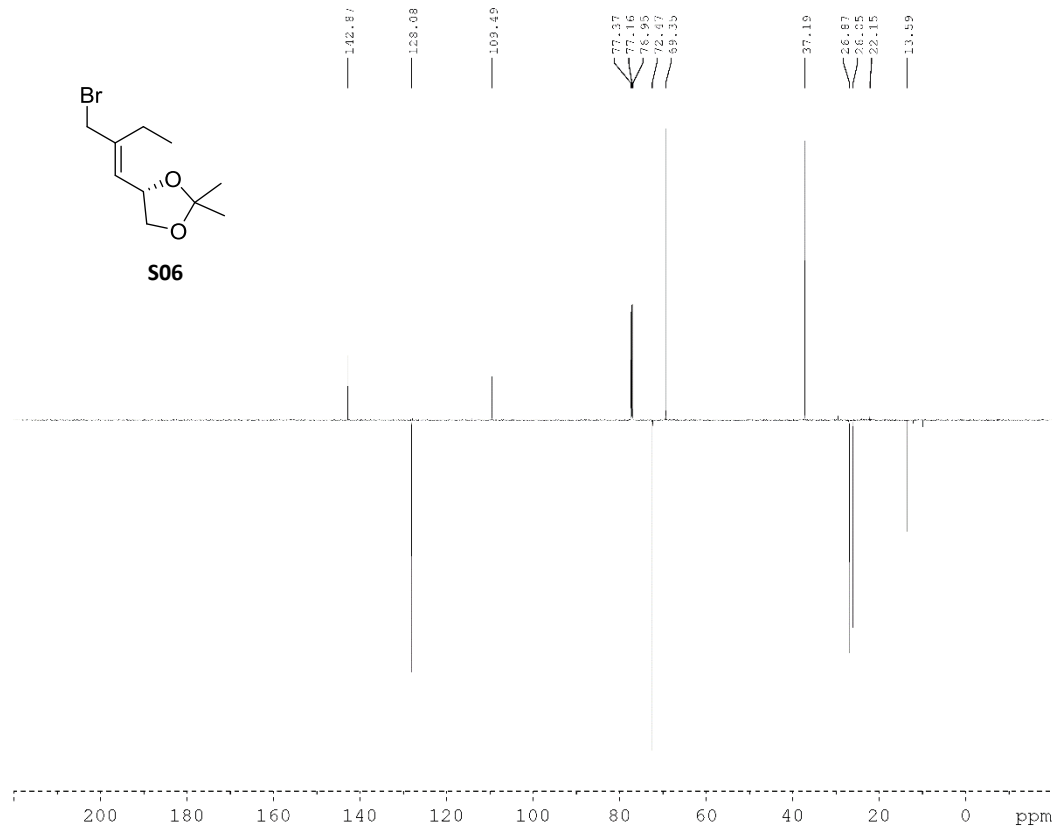

```

Current Data Parameters
NAME      JBR554
EXPNO    2
PROCNO   1

F2 - Acquisition Parameters
Date_    20180514
Time     15:28
INSTRUM  spect
PROBHD   Z117768 0067 1
PULPROG  zgpg30
TD        65536
SOLVENT  CDCl3
NS        16
DS        2
SWH       36731.883 Hz
FIDRES    0.554850 Hz
AQ        0.9043363 sec
RG         99.43
DM         13.800 usec
L2        15.00 usec
LS         290.1 K
F1        143.0000000
TIC
SFO1      100.6283600 MHz
NUC1       13C
P1        12.00 usec
PCP1      0.0568955 W

F2 - Processing parameters
SI         65536
SF         100.6283600 MHz
AQ         0.9043363 sec
RG         99.43
DM         13.800 usec
L2        15.00 usec
LS         290.1 K
F1        143.0000000
TIC
SFO1      100.6283600 MHz
NUC1       13C
P1        12.00 usec
PCP1      0.0568955 W
  
```

# Amines

group OC  
JBN263 after workup

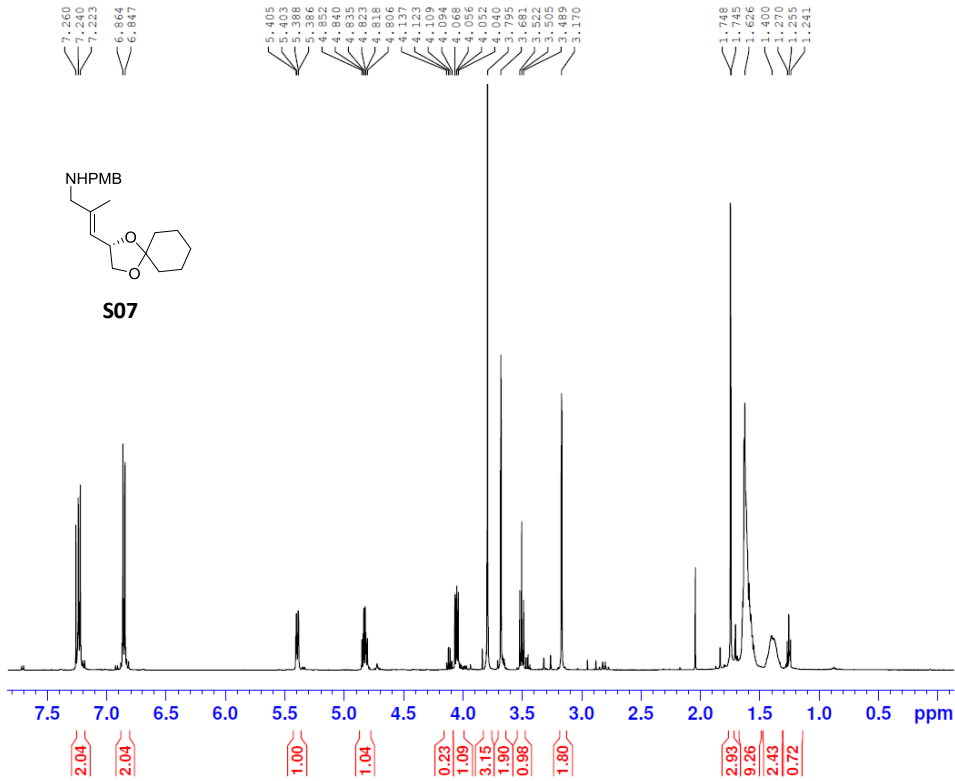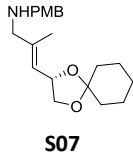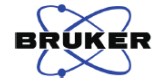

```
Current Data Parameters
NAME      JBN263
EXPNO     1
PROCNO    1

F2 - Acquisition Parameters
Date_     20160510
Time      18.18
INSTRUM   spect
PROBHD    5 mm CPTCI 1H-
PULPROG   zg30
ID         65536
SOLVENT   CDCl3
NS         16
DS         2
SWH        10330.578 Hz
FIDRES     0.157632 Hz
AQ         3.1719425 sec
RG         18
DW         48.400 usec
DE         6.50 usec
TE         296.2 K
D1         1.00000000 sec
TD         1

===== CHANNEL f1 =====
NUC1       1H
P1         6.70 usec
PL1        4.00 dB
PL1W       8.7200027 W
SFO1       500.2730894 MHz

F2 - Processing parameters
SI         32768
SF         500.2700081 MHz
WDW        EM
SSB        0
LB         0.30 Hz
GB         0
PC         1.00
```

group OC  
JBN263 after workup

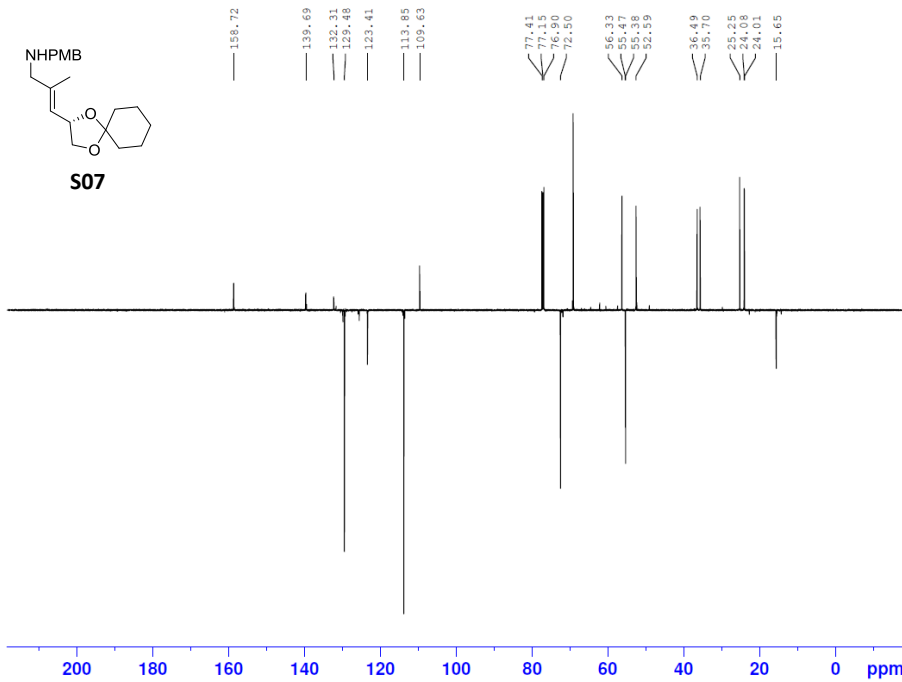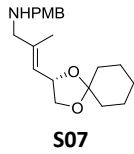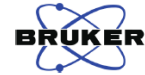

```
Current Data Parameters
NAME      JBN263
EXPNO     2
PROCNO    1

F2 - Acquisition Parameters
Date_     20160510
Time      20.20
INSTRUM   spect
PROBHD    5 mm CPTCI 1H-
PULPROG   jmod
ID         65536
SOLVENT   CDCl3
NS         512
DS         4
SWH        29761.904 Hz
FIDRES     0.454131 Hz
AQ         1.1030048 sec
RG         2050
DW         16.800 usec
DE         6.50 usec
TE         296.2 K
CNS12     145.0000000
CNS111    1.0000000
D1         2.00000000 sec
D20       0.00689655 sec
TD         1

===== CHANNEL f1 =====
NUC1       13C
P1         11.20 usec
P2         22.40 usec
PL1        -2.00 dB
PL1W       88.77790070 W
SFO1       125.8055709 MHz

===== CHANNEL f2 =====
CPDPRG2   waltz16
NUC2       1H
PCPD2     80.00 usec
PL2       4.00 dB
PL12      24.28 dB
PL2W      8.7200027 W
PL1W      0.06494062 W
SFO2     500.2720011 MHz

F2 - Processing parameters
SI         32768
SF         125.7929791 MHz
WDW        EM
SSB        0
LB         1.00 Hz
GB         0
PC         1.40
```

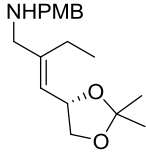

S11

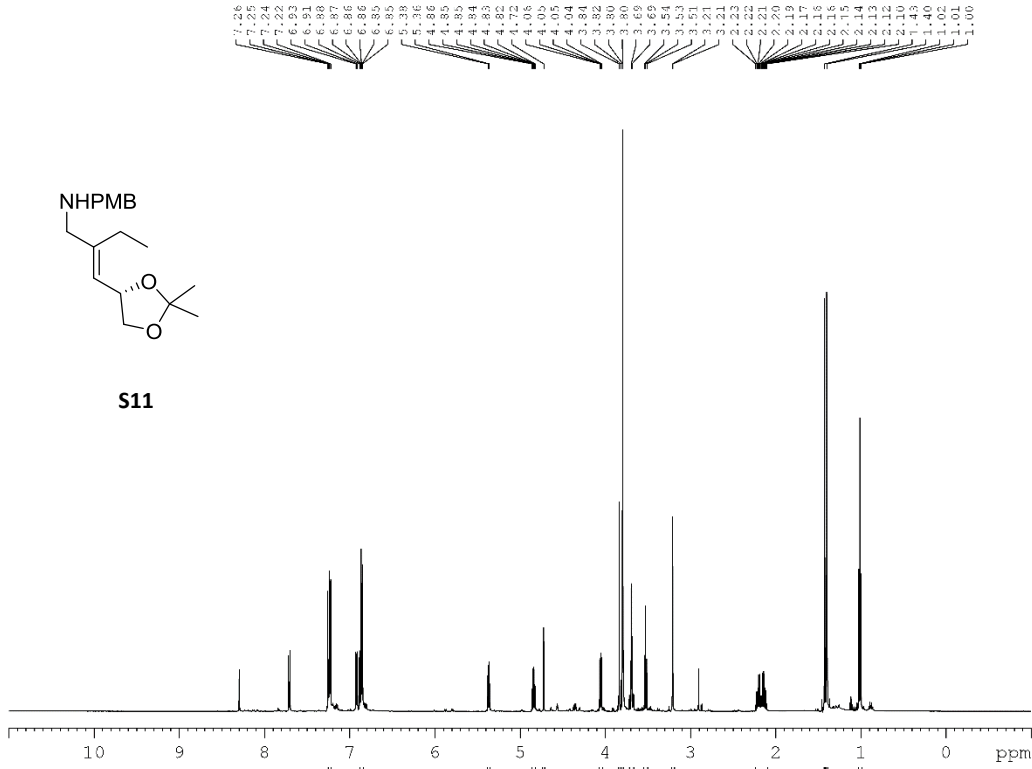

```

Current Date Parameters
Date_ 20180911
Time_ 19.39 h
INSTRUM spect
PROBHD W17768-0067 (
PULPROG zgpg30
AQ 65536
RG 320
SOLVENT CMC-3
NS 4
DS 4
SWH 36231.883 Hz
F1-NUC 13C
AQ 0.8045368 sec
RG 293.63
DS 11.802 msec
SFO 100.625000 MHz
NUC1 13C
NUC2 13C
PC 1.00
=====
F2 - Acquisition Parameters
Date_ 20180911
Time_ 19.39 h
INSTRUM spect
PROBHD W17768-0067 (
PULPROG zgpg30
AQ 65536
RG 320
SOLVENT CMC-3
NS 4
DS 4
SWH 36231.883 Hz
F1-NUC 13C
AQ 0.8045368 sec
RG 293.63
DS 11.802 msec
SFO 100.625000 MHz
NUC1 13C
NUC2 13C
PC 1.00
=====
F3 - Processing parameters
SI 32768
SF 600.1300151 MHz
WDW EM
SSB 0
LB 0.30 Hz
GB 0
PC 1.00

```

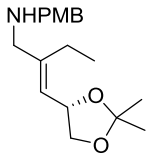

S11

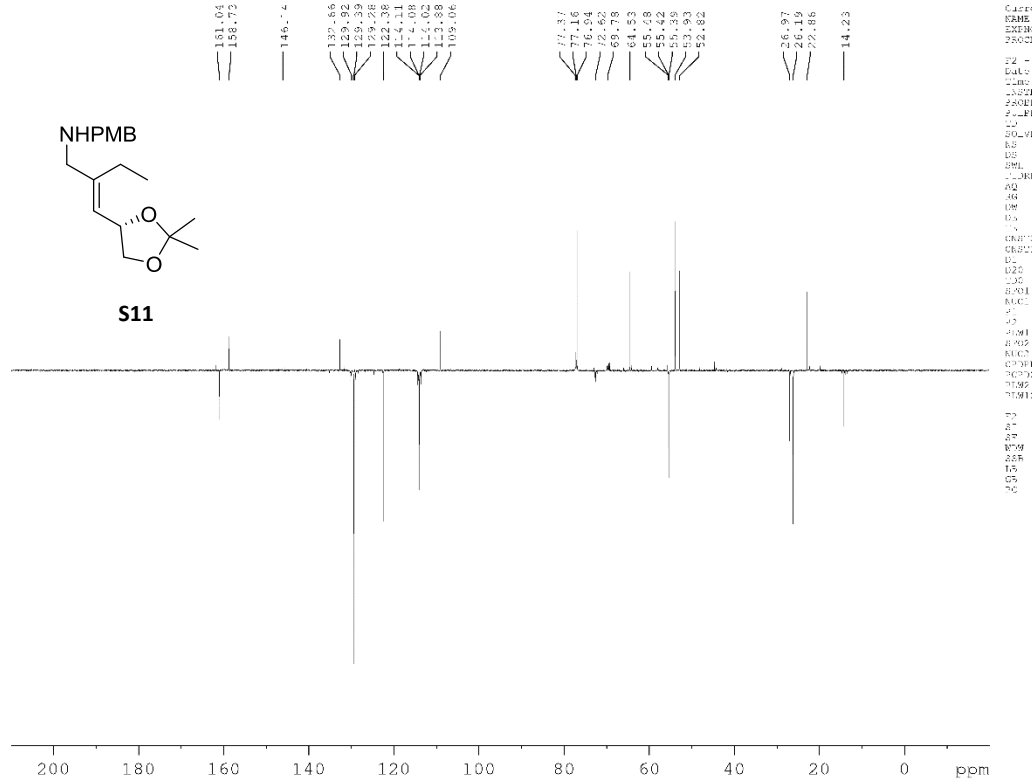

```

Current Date Parameters
Date_ 20180911
Time_ 19.39 h
INSTRUM spect
PROBHD W17768-0067 (
PULPROG zgpg30
AQ 65536
RG 320
SOLVENT CMC-3
NS 4
DS 4
SWH 36231.883 Hz
F1-NUC 13C
AQ 0.8045368 sec
RG 293.63
DS 11.802 msec
SFO 100.625000 MHz
NUC1 13C
NUC2 13C
PC 1.00
=====
F2 - Acquisition Parameters
Date_ 20180911
Time_ 19.39 h
INSTRUM spect
PROBHD W17768-0067 (
PULPROG zgpg30
AQ 65536
RG 320
SOLVENT CMC-3
NS 4
DS 4
SWH 36231.883 Hz
F1-NUC 13C
AQ 0.8045368 sec
RG 293.63
DS 11.802 msec
SFO 100.625000 MHz
NUC1 13C
NUC2 13C
PC 1.00
=====
F3 - Processing parameters
SI 32768
SF 100.625000 MHz
WDW EM
SSB 0
LB 1.00 Hz
GB 0
PC 1.00

```

Acetals

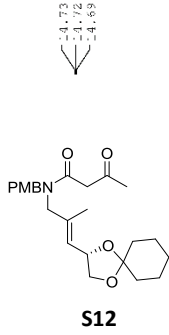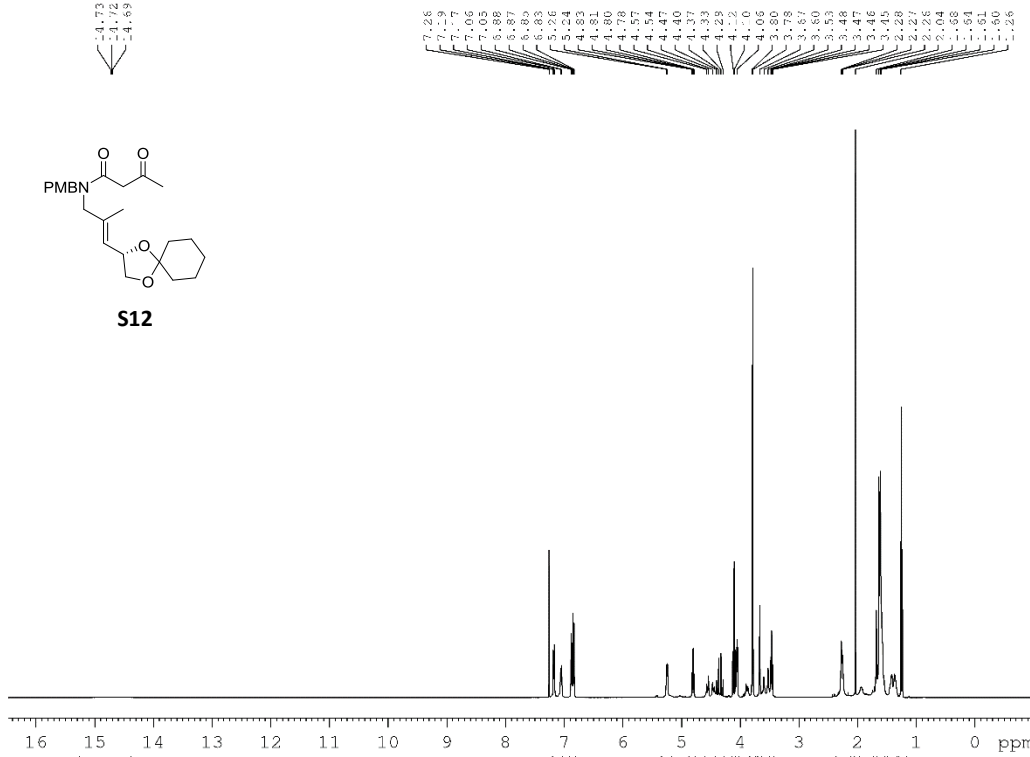

Current Data Parameters  
 NAME JMR247  
 EXPNO 1  
 PROCNO 1  
 F2 - Acquisition Parameters  
 Date\_ 20-05-11  
 Time 12:26  
 INSTRUM spect  
 PROBRW 5.0000000 MHz  
 PULPROG zgpg30  
 TD 65536  
 SOLVENT cde-d  
 NS 4  
 DS 4  
 SWH 10330.578 MHz  
 FIDRES 0.157630 Hz  
 AQ 3.1719425 sec  
 TC 14  
 SC 48.400 sec  
 DC 6.00 sec  
 RF 50.125 MHz  
 DI 1.0000000 sec  
 TE0  
 ===== CHANNEL f1 =====  
 NUC1 1H  
 P1 5.70 sec  
 PL1 4.00 dB  
 STW 8.7200000 MHz  
 SFO1 500.1362994 MHz  
 F2 - Processing parameters  
 SI 32768  
 SF 500.1362994 MHz  
 LR 32768  
 GB 0  
 LB 0.00 MHz  
 GB 0  
 PC 1.00

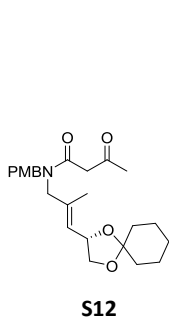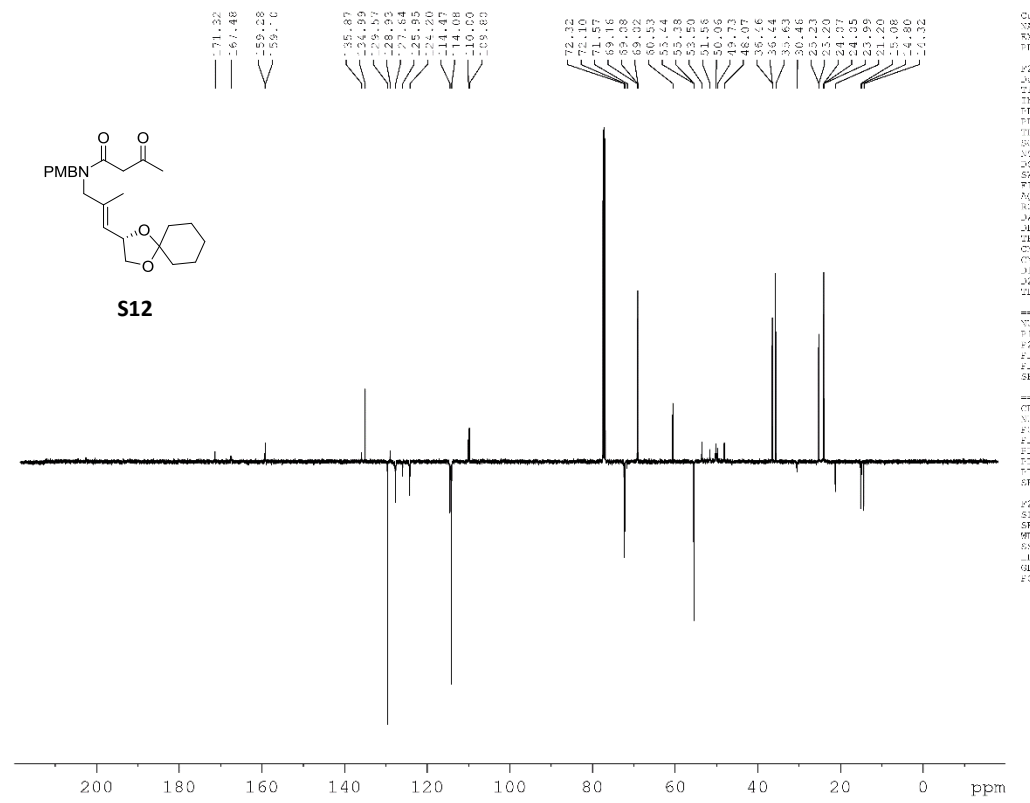

Current Data Parameters  
 NAME JMR247  
 EXPNO 1  
 PROCNO 1  
 F2 - Acquisition Parameters  
 Date\_ 20-05-11  
 Time 13:13  
 INSTRUM spect  
 PROBRW 5.0000000 MHz  
 PULPROG zgpg30  
 TD 65536  
 SOLVENT cde-d  
 NS 4  
 DS 4  
 SWH 29561.924 MHz  
 FIDRES 0.154731 Hz  
 AQ 1.1110038 sec  
 TC 14  
 SC 48.400 sec  
 DC 6.00 sec  
 RF 50.125 MHz  
 DI 1.0000000 sec  
 TE0  
 J20 0.00883855 sec  
 TD0 1  
 ===== CHANNEL f1 =====  
 NUC1 13C  
 P1 11.20 sec  
 PL1 22.40 dB  
 STW 80.7779000 MHz  
 SFO1 125.7625779 MHz  
 ===== CHANNEL f2 =====  
 NUC2 1H  
 P2 00.00 sec  
 PL2 4.00 dB  
 STW 8.7200000 MHz  
 SFO2 500.1362994 MHz  
 F2 - Processing parameters  
 SI 32768  
 SF 125.7779000 MHz  
 LR 32768  
 GB 0  
 LB 1.00 MHz  
 GB 0  
 PC 1.40

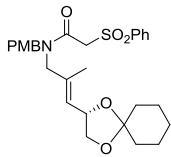

**S13**

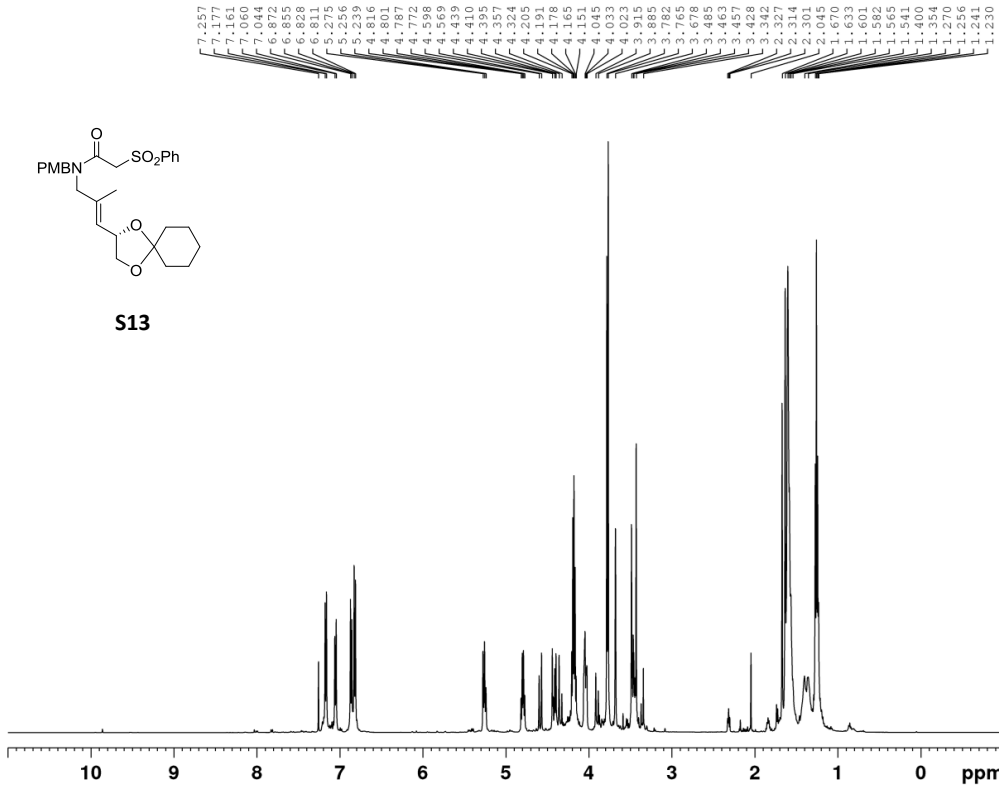

```

Current Data Parameters
NAME          BM008f
EXPNO         1
PROCNO        1

F2 - Acquisition Parameters
Date_         20161031
Time          16.12
INSTRUM       spect
PROBHD        5 mm CPTCI 1H-
PULPROG       zg30
TD            65536
SOLVENT       CDCl3
NS            16
DS            2
SWH           10330.578 Hz
FIDRES        0.157632 Hz
AQ            3.1719425 sec
RG            11.3
DW            48.400 usec
DE            6.50 usec
TE            298.3 K
D1            1.00000000 sec
TDO           1

===== CHANNEL f1 =====
NUC1           1H
P1             6.70 usec
PL1            4.00 dB
PL1W           8.72000027 W
SFO1           500.2730894 MHz

F2 - Processing parameters
SI             32768
SF            500.2700096 MHz
WDW            EM
SSB            0
LB             0.30 Hz
GB             0
PC             1.00
  
```

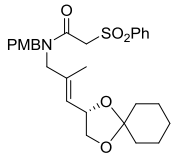

**S13**

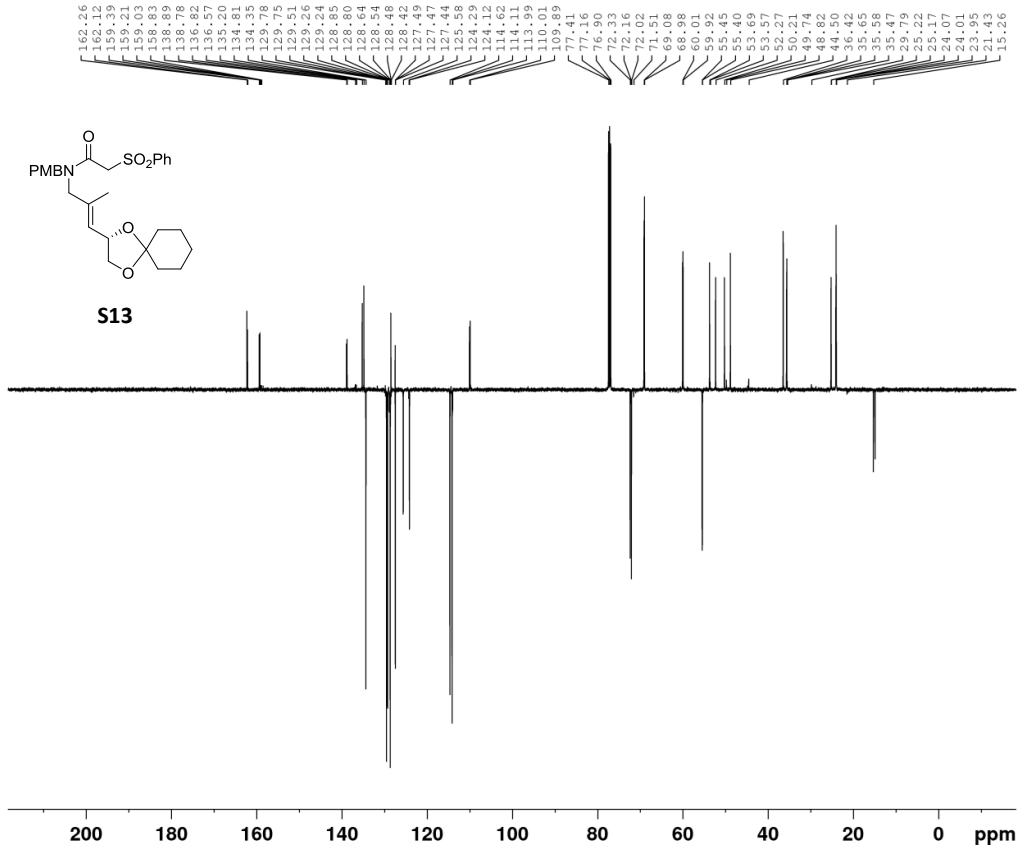

```

Current Data Parameters
NAME          BM039purefinal
EXPNO         1
PROCNO        1

F2 - Acquisition Parameters
Date_         20160826
Time          11.26
INSTRUM       spect
PROBHD        5 mm CPTCI 1H-
PULPROG       jmod
TD            65536
SOLVENT       CDCl3
NS            256
DS            4
SWH           29761.904 Hz
FIDRES        0.454131 Hz
AQ            1.1010048 sec
RG            2050
DW            16.800 usec
DE            6.50 usec
TE            298.2 K
D1            145.0000000
CNST2         1.0000000
CNST11        1.0000000
D1            2.80000000 sec
D20           0.00689655 sec
TDO           1

===== CHANNEL f1 =====
NUC1           13C
P1             11.28 usec
P2             22.40 usec
PL1            -2.00 dB
PL1W           88.77790070 W
SFO1           125.8015709 MHz

===== CHANNEL f2 =====
CPDPRG12       waltz16
NUC2           1H
PCPD2          80.00 usec
PL2            4.00 dB
PL12           25.28 dB
PL2W           8.72000027 W
PL12W          0.06494062 W
SFO2           500.2720011 MHz

F2 - Processing parameters
SI             32768
SF            125.7929818 MHz
WDW            EM
SSB            0
LB             1.00 Hz
GB             0
PC             1.40
  
```



8.998  
7.961  
7.946  
7.744  
7.729  
7.719  
7.704  
7.683  
7.583  
7.504  
7.489  
7.476  
7.462  
7.446  
7.440  
7.404  
7.392  
7.377  
7.260  
7.225  
7.213  
7.187  
7.133  
7.093  
7.076  
6.893  
6.877  
6.852  
6.826  
6.822  
6.718  
5.718  
5.300  
5.285  
4.833  
4.819  
4.804  
4.582  
4.524  
4.507  
4.495  
4.480  
4.460  
4.356  
4.306  
4.152  
4.140  
4.108  
4.096  
4.066  
4.057  
3.926  
3.810  
3.797  
3.750  
3.489  
3.478  
3.469  
3.444  
1.712  
1.643  
1.622  
1.607  
1.427  
1.375

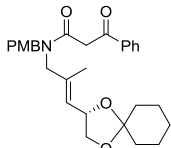

S14

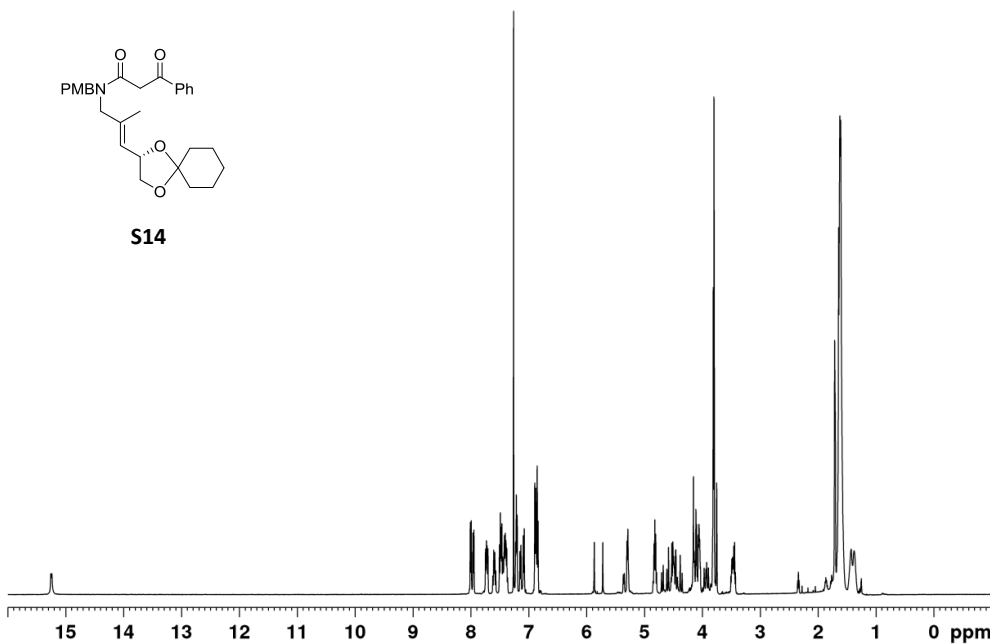

Current Data Parameters  
NAME BMO030  
EXPNO 1  
PROCNO 1

F2 - Acquisition Parameters  
Date\_ 20160813  
Time 17.31  
INSTRUM spect  
PROBHD 5 mm CPTCI 1H-  
PULPROG zg30  
TD 65536  
SOLVENT CDC13  
NS 16  
DS 2  
SWH 10330.578 Hz  
FIDRES 0.157632 Hz  
AQ 3.1719425 sec  
RG 12.7  
DW 48.400 usec  
DE 6.50 usec  
TE 298.3 K  
D1 1.00000000 sec  
TD0 1

----- CHANNEL f1 -----  
NUC1 1H  
P1 6.70 usec  
PL1 4.00 dB  
PL1W 8.72000027 W  
SF01 500.2730894 MHz

F2 - Processing parameters  
SI 32768  
SF 500.2700076 MHz  
WDW EM  
SSB 0  
LB 0.30 Hz  
GB 0  
PC 1.00

194.23  
194.15  
172.87  
172.79  
172.18  
171.98  
168.00  
167.79  
159.24  
159.14  
159.07  
136.31  
136.21  
136.15  
136.07  
135.04  
135.04  
134.93  
133.89  
130.90  
130.87  
129.66  
129.30  
128.30  
128.33  
128.11  
128.00  
128.00  
125.86  
125.50  
125.04  
124.20  
118.47  
110.02  
109.80  
85.12  
84.93  
77.41  
77.16  
76.90  
72.35  
72.16  
69.10  
69.07  
69.03  
55.48  
55.46  
53.46  
53.37  
51.65  
51.25  
49.87  
49.22  
48.14  
47.06  
45.88  
45.88  
36.49  
36.41  
35.70  
35.68  
35.63  
25.27  
24.10  
24.10  
24.02  
15.14  
15.06  
15.01  
14.77

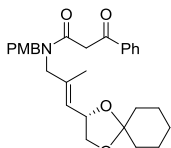

S14

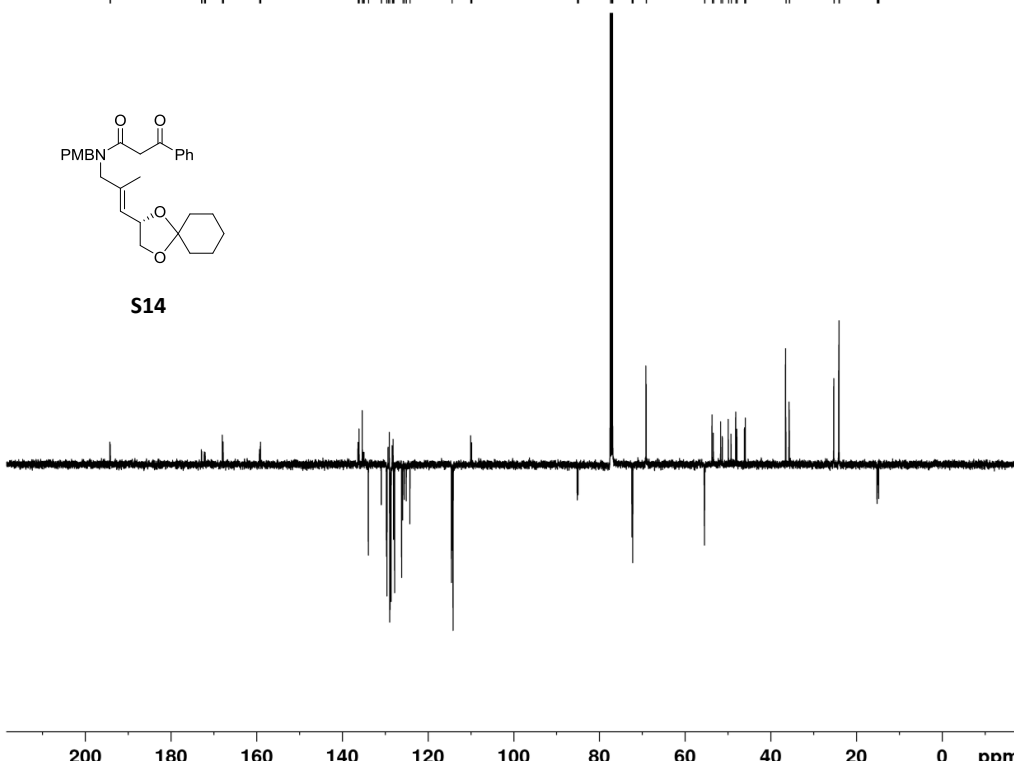

Current Data Parameters  
NAME BMO030  
EXPNO 1  
PROCNO 1

F2 - Acquisition Parameters  
Date\_ 20160813  
Time 18.26  
INSTRUM spect  
PROBHD 5 mm CPTCI 1H-  
PULPROG jmod  
TD 65536  
SOLVENT CDC13  
NS 1024  
DS 4  
SWH 29761.904 Hz  
FIDRES 0.454131 Hz  
AQ 1.1010048 sec  
RG 2050  
DW 16.800 usec  
DE 6.50 usec  
TE 298.2 K  
CNST1 145.0000000  
CNST11 1.0000000  
D1 2.00000000 sec  
D20 0.00689655 sec  
TD0 1

----- CHANNEL f1 -----  
NUC1 13C  
P1 11.20 usec  
P2 22.40 usec  
PL1 -2.00 dB  
PL1W 88.77790070 W  
SF01 125.8055709 MHz

----- CHANNEL f2 -----  
CPDPRG2 waltz16  
NUC2 1H  
PCPD2 80.00 usec  
PL2 4.00 dB  
PL12 25.28 dB  
PL2W 8.72000027 W  
PL1W 8.06494862 W  
SFO2 500.2720011 MHz

F2 - Processing parameters  
SI 32768  
SF 125.7929764 MHz  
WDW EM  
SSB 0  
LB 1.00 Hz  
GB 0  
PC 1.40

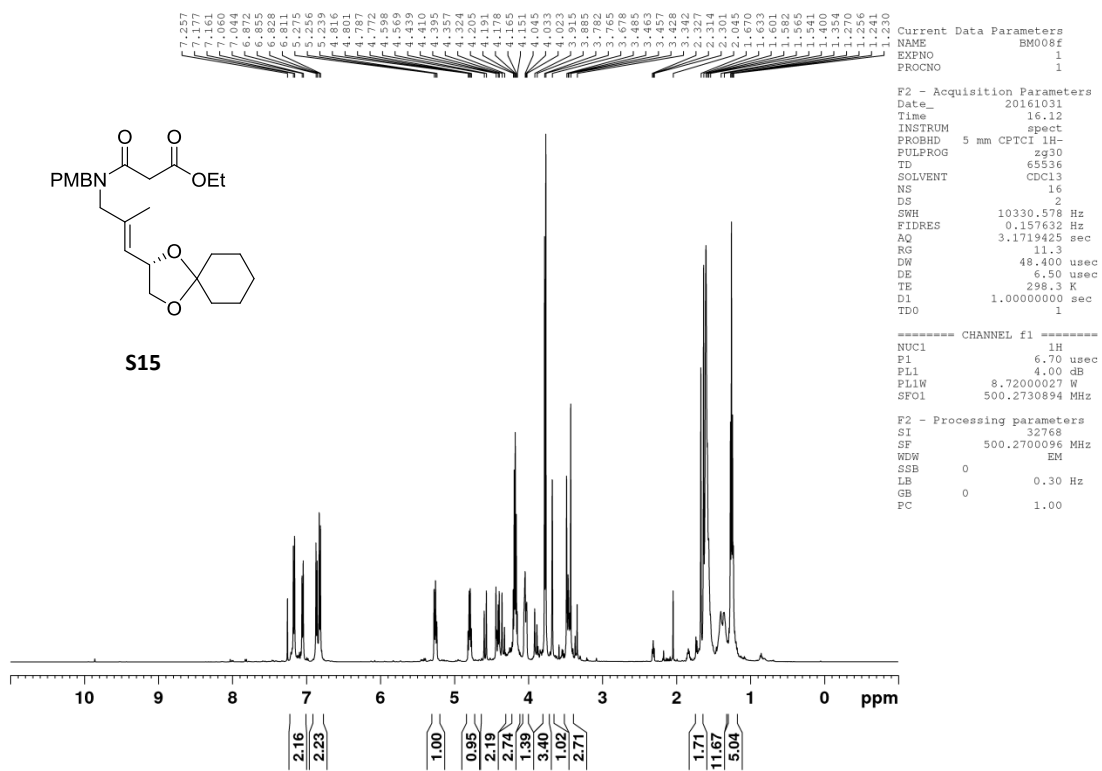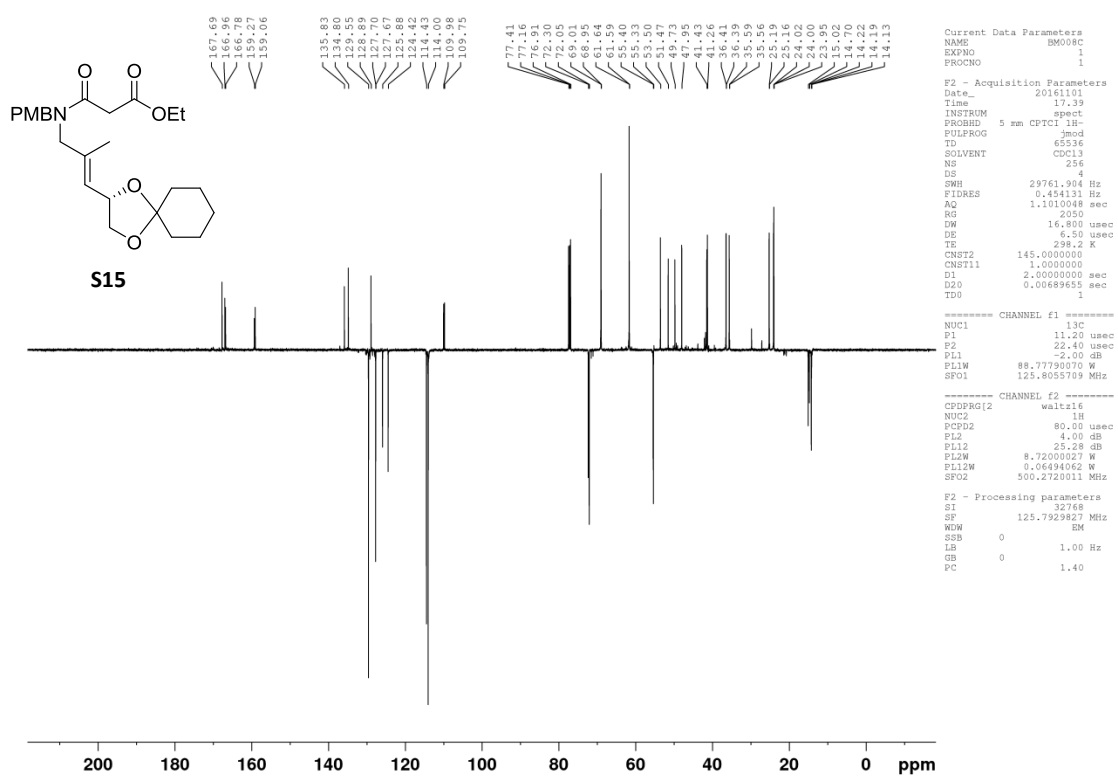

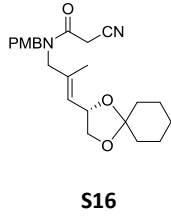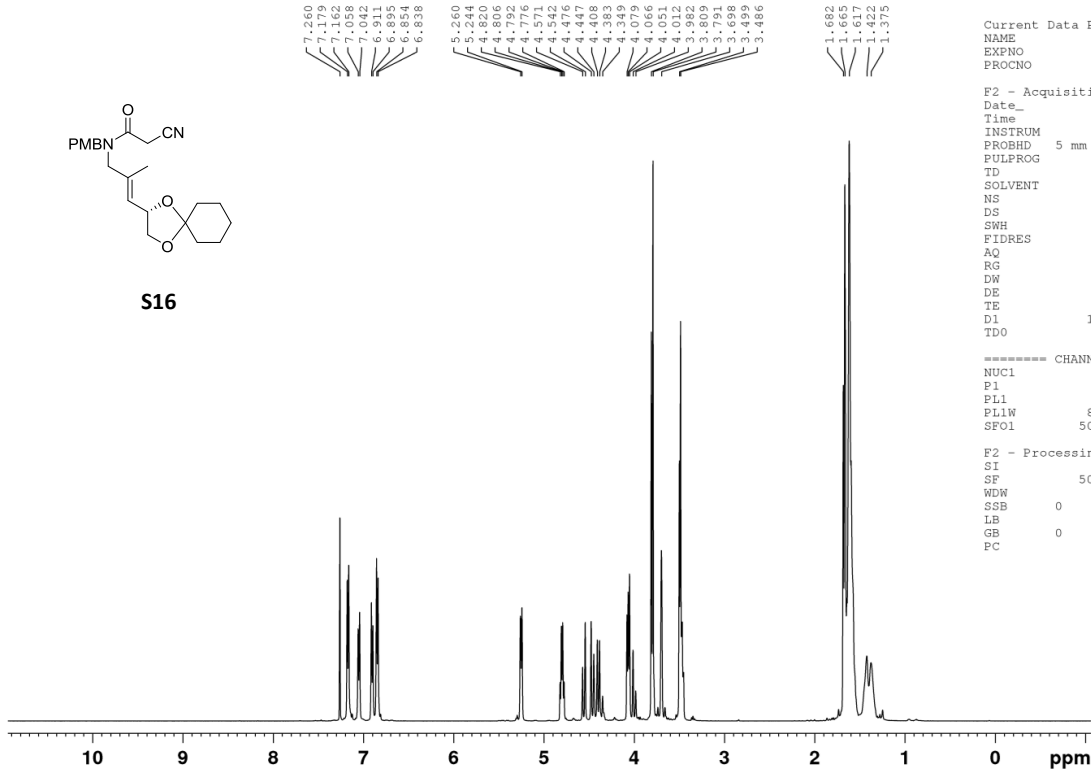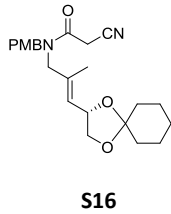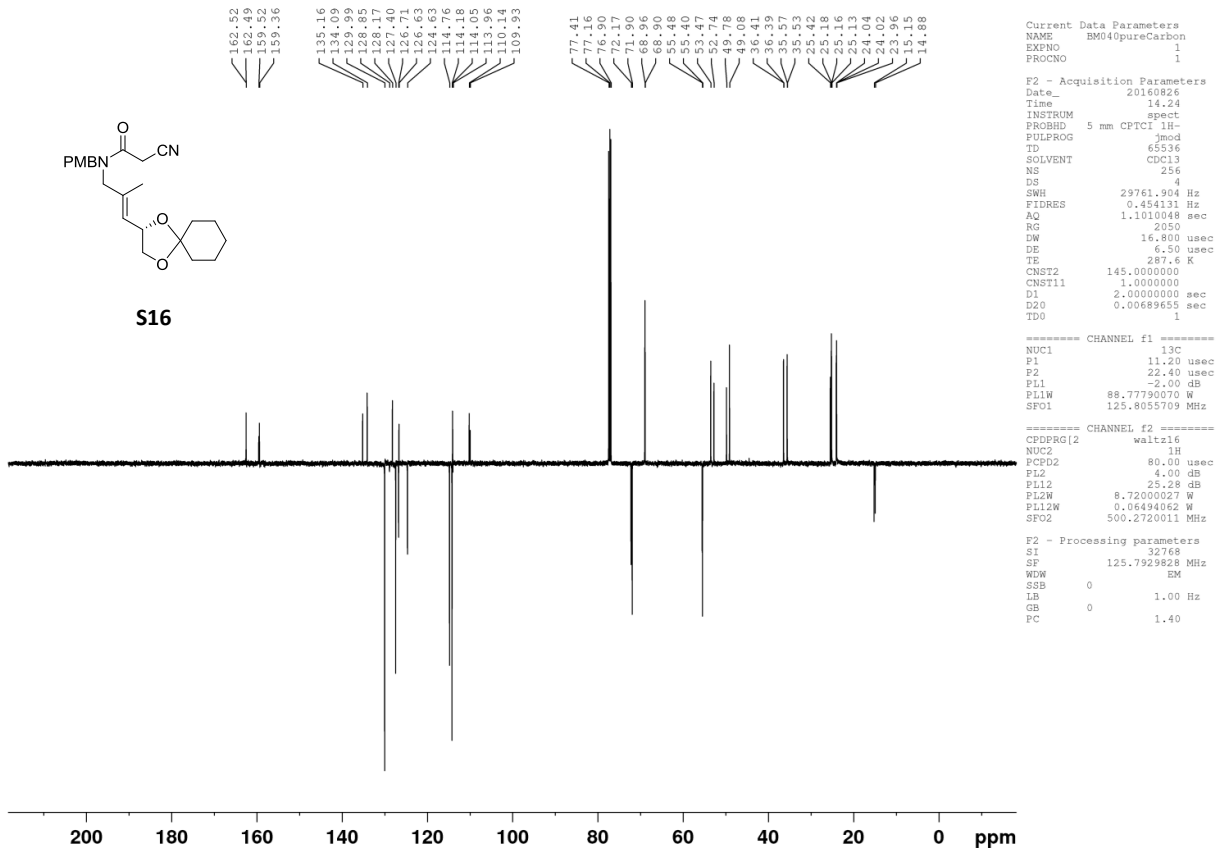

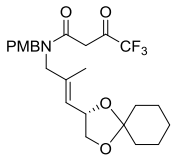

**S17**

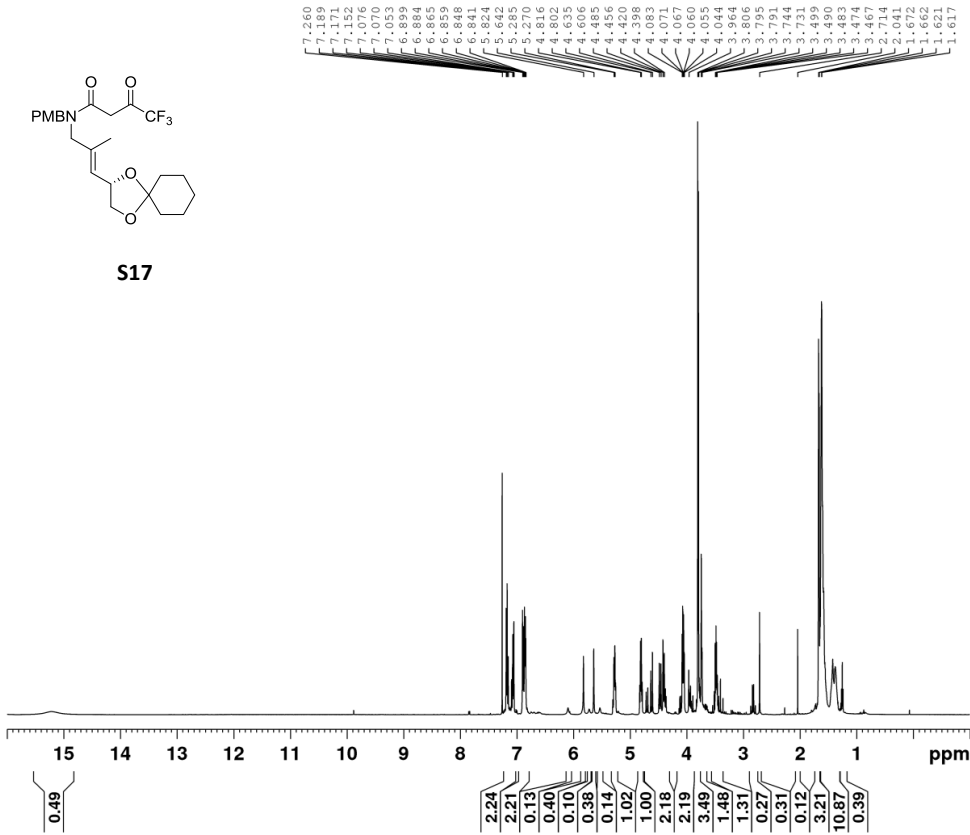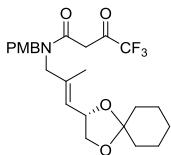

**S17**

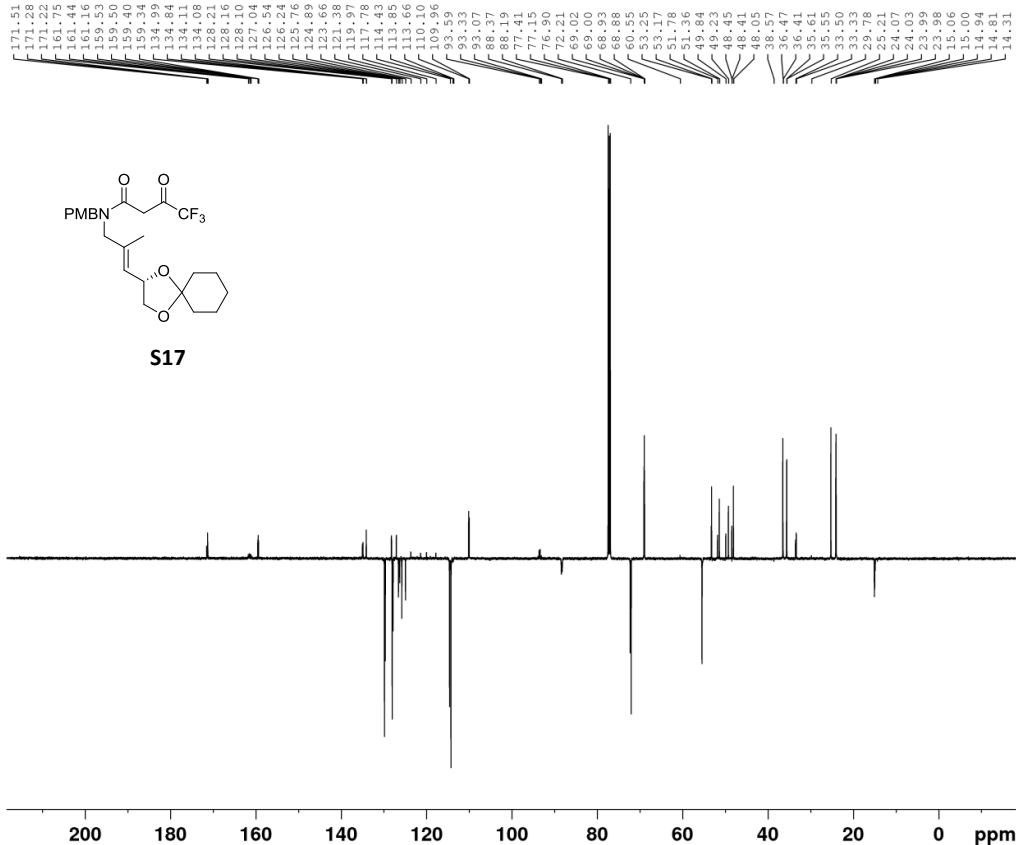

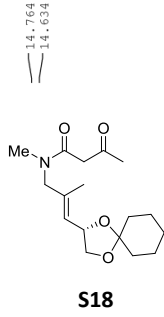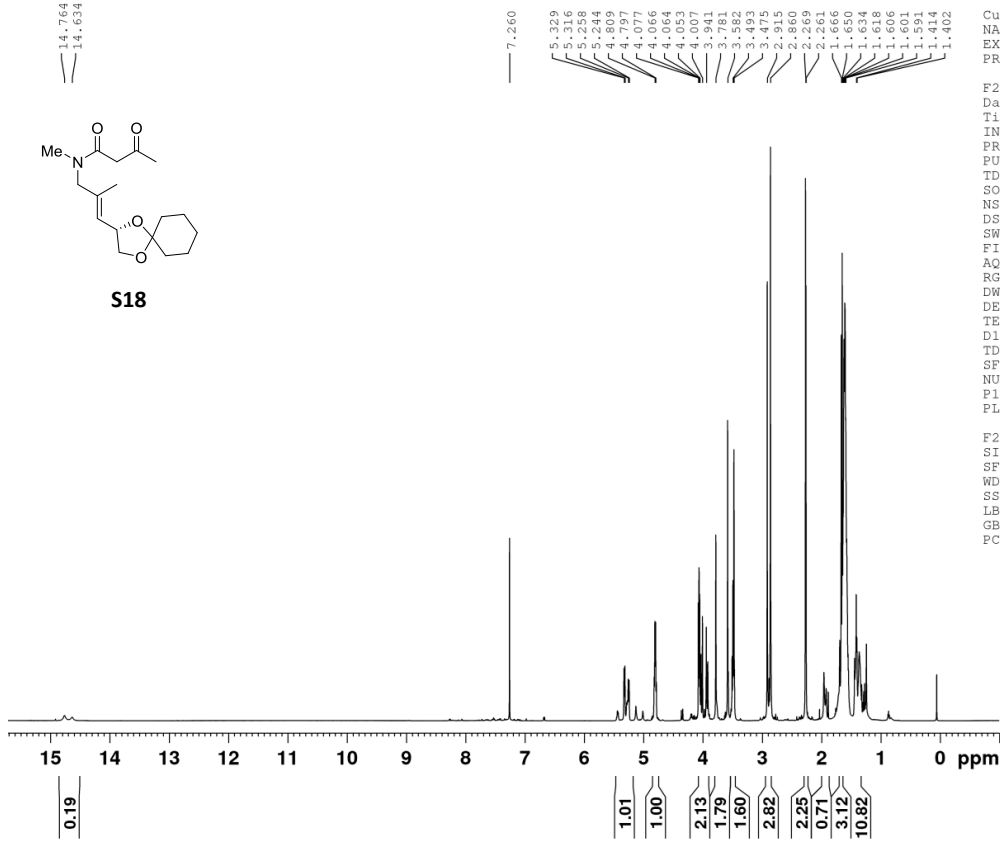

Current Data Parameters  
 NAME JBN460  
 EXPNO 1  
 PROCNO 1

F2 - Acquisition Parameters  
 Date\_ 20171208  
 Time 10.03 h  
 INSTRUM spect  
 PROBHD Z117768\_0067 ( )  
 PULPROG zg30  
 TD 65536  
 SOLVENT CDCl3  
 NS 16  
 DS 2  
 SWH 12019.230 Hz  
 FIDRES 0.183399 Hz  
 AQ 2.7262976 sec  
 RG 14.39  
 DW 41.600 usec  
 DE 18.00 usec  
 TE 298.0 K  
 D1 1.00000000 sec  
 TD0 1  
 SFO1 600.1337058 MHz  
 NUC1 1H  
 P1 8.00 usec  
 PLW1 6.76100016 W

F2 - Processing parameters  
 SI 65536  
 SF 600.1300154 MHz  
 WDW EM  
 SSB 0  
 LB 0.30 Hz  
 GB 0  
 PC 1.00

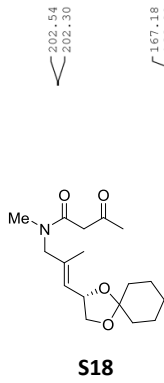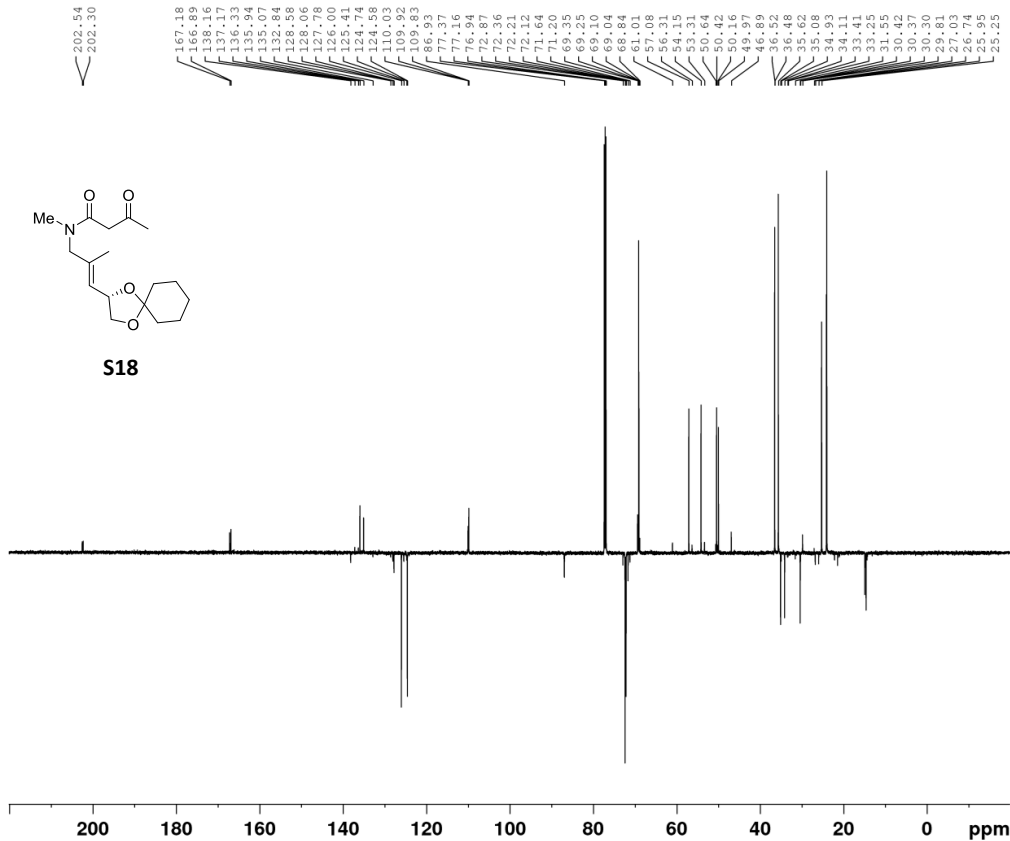

Current Data Parameters  
 NAME JBN460  
 EXPNO 2  
 PROCNO 1

F2 - Acquisition Parameters  
 Date\_ 20171208  
 Time 10.29 h  
 INSTRUM spect  
 PROBHD Z117768\_0067 ( )  
 PULPROG jmod  
 TD 65536  
 SOLVENT CDCl3  
 NS 512  
 DS 4  
 SWH 36231.883 Hz  
 FIDRES 0.552855 Hz  
 AQ 0.9043968 sec  
 RG 199.43  
 DW 13.800 usec  
 DE 18.00 usec  
 TE 298.0 K  
 CNST2 145.0000000  
 CNST11 1.0000000  
 D1 2.00000000 sec  
 D20 0.00689655 sec  
 TD0 1  
 SFO1 150.9178988 MHz  
 NUC1 13C  
 P1 12.00 usec  
 P2 24.00 usec  
 PLW1 88.22599792 W  
 SFO2 600.1324005 MHz  
 NUC2 1H  
 CPDPRG2 waltz16  
 FCF2 80.00 usec  
 PLW2 6.76100016 W  
 PLW12 0.06699187 W

F2 - Processing parameters  
 SI 32768  
 SF 150.9027912 MHz  
 WDW EM  
 SSB 0  
 LB 1.00 Hz  
 GB 0  
 PC 1.40

14.949  
14.927  
14.912  
14.788  
14.699

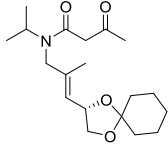

S19

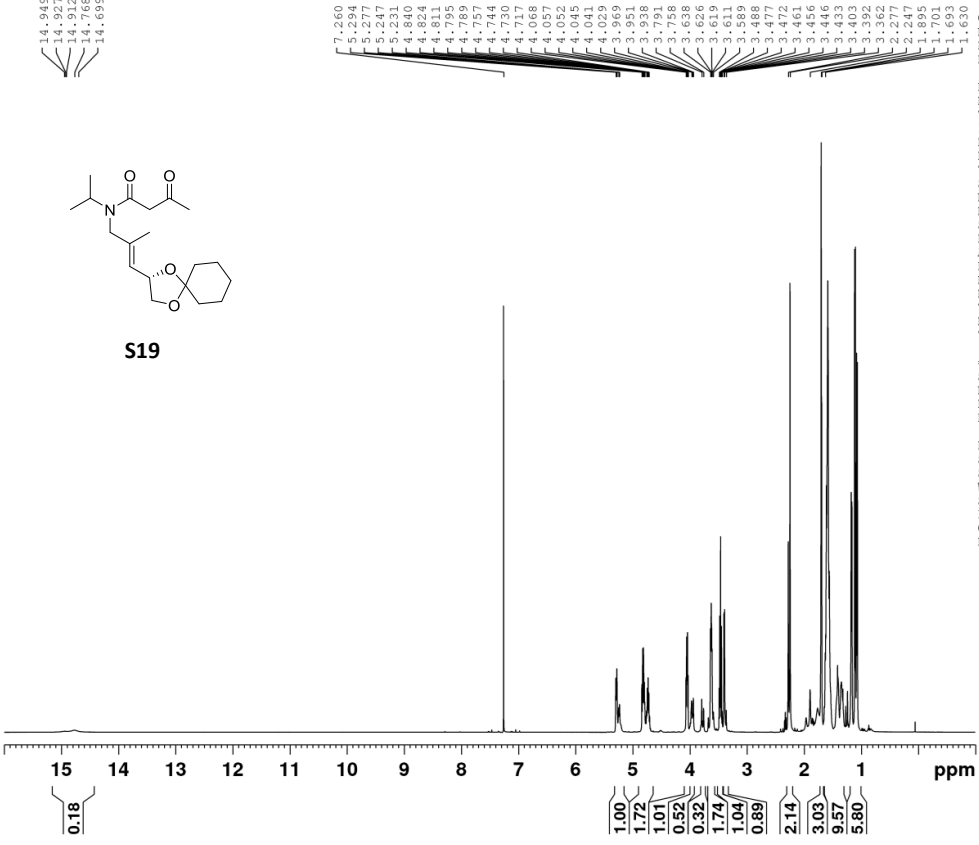

```
Current Data Parameters
NAME JBN396
EXPNO 1
PROCNO 1

F2 - Acquisition Parameters
Date_ 20170824
Time 2.20
INSTRUM spect
PROBHD 5 mm CPTCI 1H-
PULPROG zg30
TD 65536
SOLVENT CDCl3
NS 16
DS 2
SWH 10000.000 Hz
FIDRES 0.152588 Hz
AQ 3.2767999 sec
RG 14.2
DW 50.000 usec
DE 10.00 usec
TE 298.2 K
D1 1.00000000 sec
TDO 1

===== CHANNEL f1 =====
SF01 500.2730894 MHz
NUC1 1H
P1 7.63 usec
PLW1 9.50000000 W

F2 - Processing parameters
SI 65536
SF 500.2700083 MHz
WDW EM
SSB 0
LB 0.30 Hz
GB 0
PC 1.00
```

203.10  
202.63

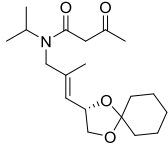

S19

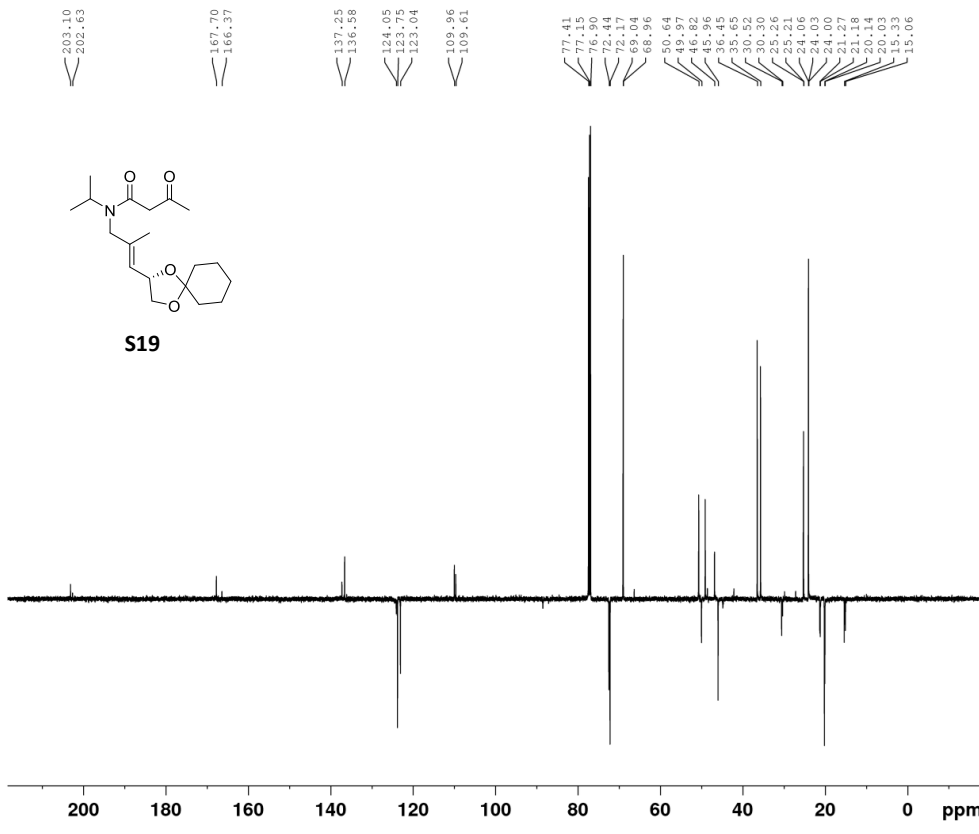

```
Current Data Parameters
NAME JBN396
EXPNO 1
PROCNO 1

F2 - Acquisition Parameters
Date_ 20170824
Time 2.47
INSTRUM spect
PROBHD 5 mm CPTCI 1H-
PULPROG smod
TD 65536
SOLVENT CDCl3
NS 512
DS 4
SWH 29761.904 Hz
FIDRES 0.454131 Hz
AQ 1.1010048 sec
RG 1180
DW 16.800 usec
DE 18.00 usec
TE 298.2 K
CNST2 145.0000000
CNST11 1.0000000
D1 2.00000000 sec
D20 0.00689653 sec
TDO 1

===== CHANNEL f1 =====
SF01 125.8055709 MHz
NUC1 13C
P1 14.00 usec
P2 28.00 usec
PLW1 90.00000000 W

===== CHANNEL f2 =====
SF02 500.2720011 MHz
NUC2 1H
CPDPRG2 waltz16
PCPD2 80.00 usec
PLW2 9.50000000 W
PLW12 0.08641600 W

F2 - Processing parameters
SI 32768
SF 125.7929780 MHz
WDW EM
SSB 0
LB 1.00 Hz
GB 0
PC 1.40
```



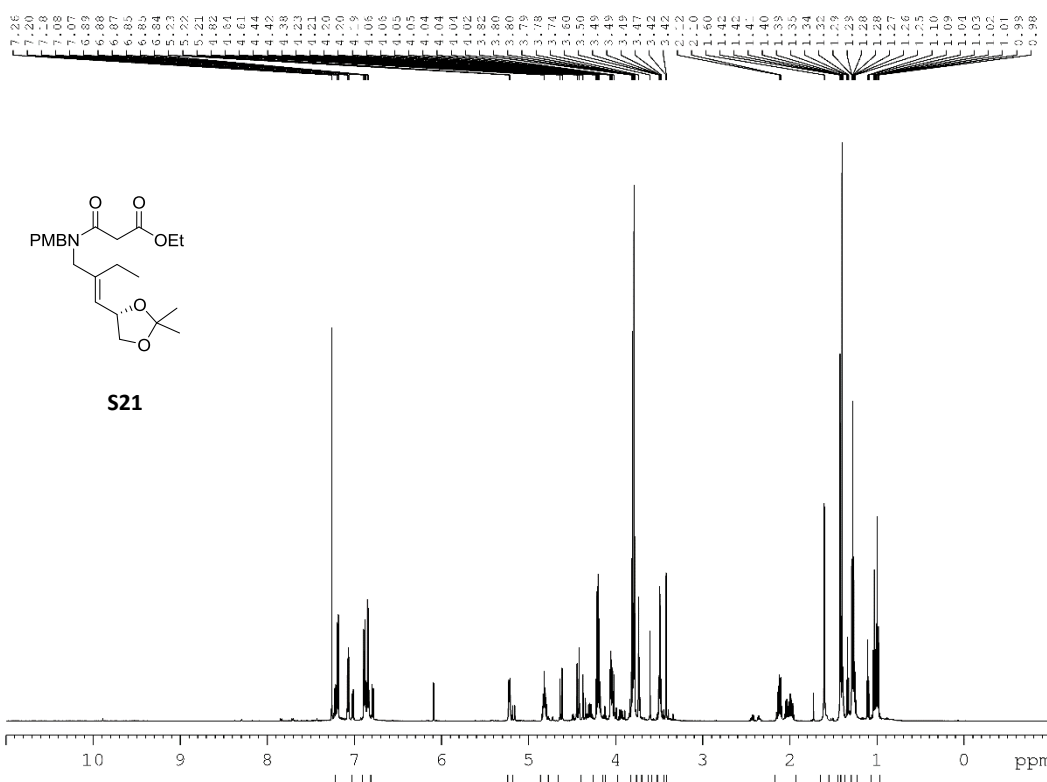

Current Data Parameters

NAME: JN5556

EXPNO: 1

PROCNO: 1

F2 - Acquisition Parameters

Date\_ : 20060718

Time : 10.07 h

INSTRUM : spect

PROBHD : 5mmBBO1H1

PULPROG : zgpg30

TD : 65536

SOLVENT : CDCl3

NS : 512

DS : 4

SWH : 12019.250 Hz

FIDRES : 0.183399 Hz

AQ : 7.2967976 sec

RG : 312

DW : 41.600 usec

DE : 10.00 usec

TE : 298.1 K

DT : 1.0000000 sec

TD0 : 1

CHST1 : 1.0000000

CHST2 : 2.0000000

CHST3 : 0.0000000

SP0 : 150.9178958 MHz

NUC1 : 13C

PC : 12.00 usec

P2 : 74.00 usec

PLW : 86.2259752 W

STW : 530.1324000 MHz

WDW : 1

GB : 0.0000000

PC2 : 6.7613097 W

PC3 : 0.36699187 W

F2 - Processing parameters

SI : 65536

SF : 600.130146 MHz

WDW : EM

SSB : 0

LB : 0.30 Hz

GB : 0

TC : 1.00

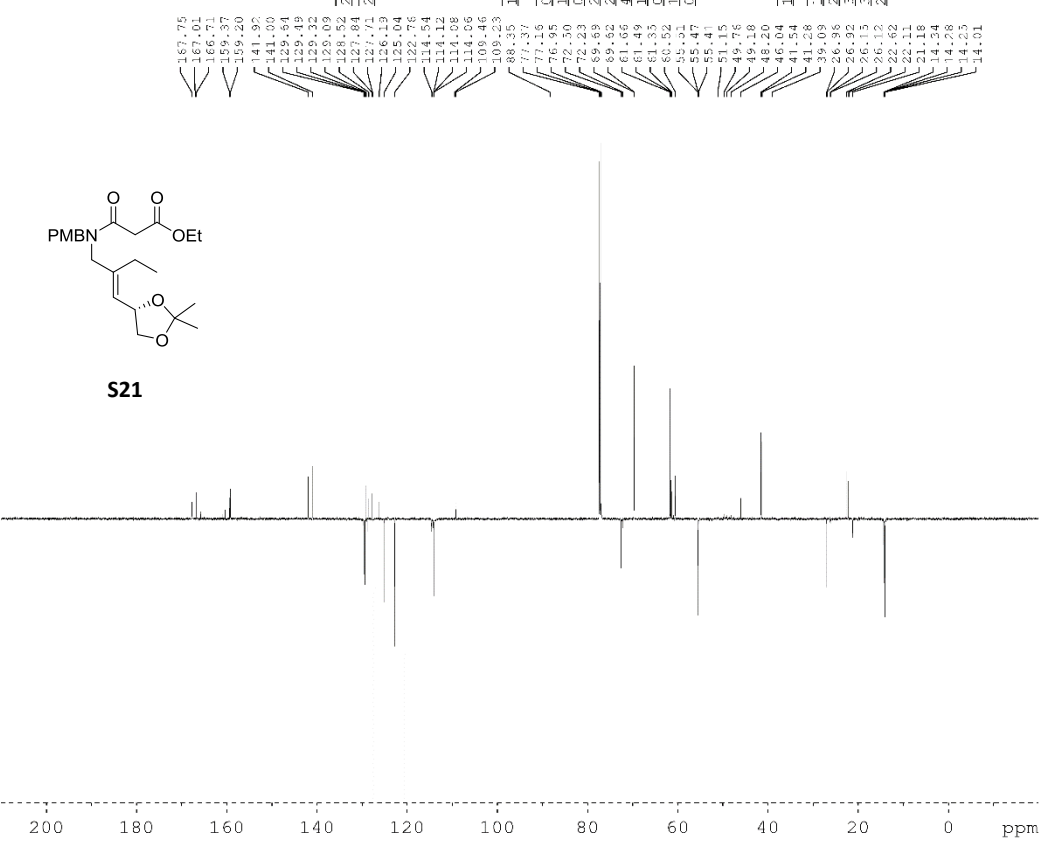

Current Data Parameters

NAME: JN5556

EXPNO: 2

PROCNO: 1

F2 - Acquisition Parameters

Date\_ : 20060718

Time : 10.30 h

INSTRUM : spect

PROBHD : 5mmBBO1H1

PULPROG : zgpg30

TD : 65536

SOLVENT : CDCl3

NS : 512

DS : 4

SWH : 16031.894 Hz

FIDRES : 0.552855 Hz

AQ : 6.9043960 sec

RG : 195.33

DW : 10.800 usec

DE : 10.00 usec

TE : 298.1 K

CHST1 : 1.0000000

CHST2 : 2.0000000

CHST3 : 0.0000000

SP0 : 150.9178958 MHz

NUC1 : 13C

PC : 12.00 usec

P2 : 74.00 usec

PLW : 86.2259752 W

STW : 530.1324000 MHz

WDW : 1

GB : 0.0000000

PC2 : 6.7613097 W

PC3 : 0.36699187 W

F2 - Processing parameters

SI : 65536

SF : 150.9027692 MHz

WDW : EM

SSB : 0

LB : 1.00 Hz

GB : 0

TC : 1.00



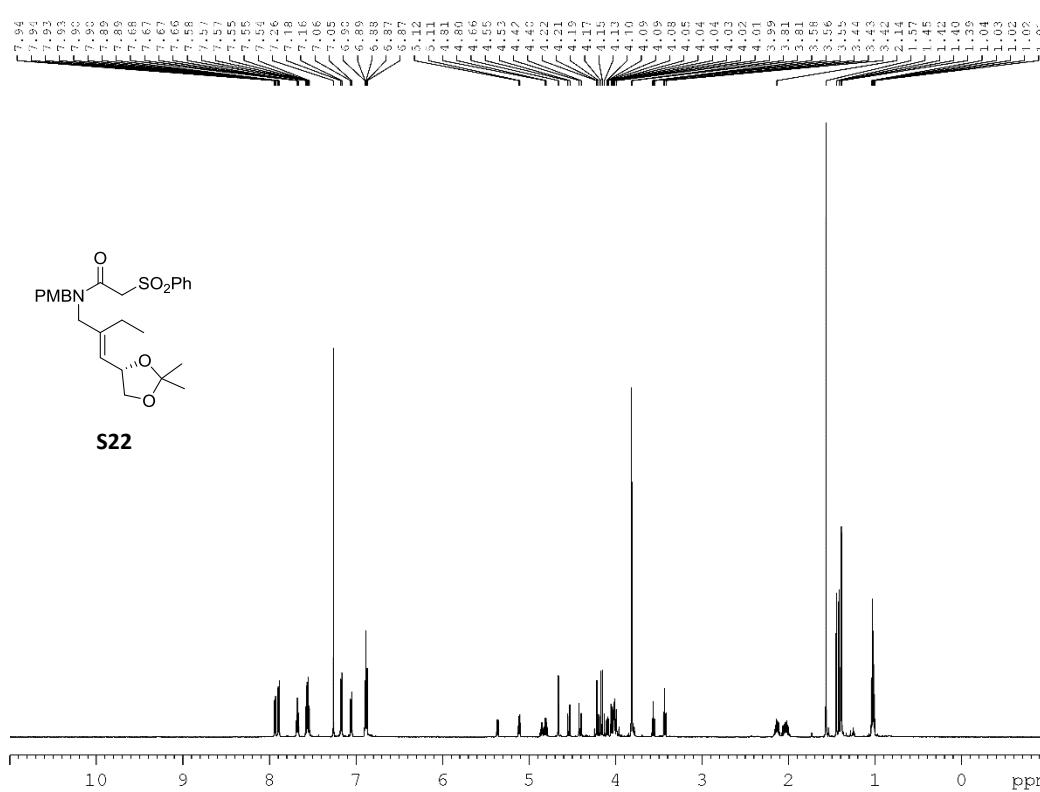

```

Current Date Parameters
NAME      165350
EXPNO     5
PROCNO    1

F2 - Acquisition Parameters
Date_     20120908
Time      11:44
INSTRUM   spect
PROBHD    51 7960_052 (
PULPROG   zgpg30
SOLVENT   CDCl3
NS        16
DS        2
SWH        10039.730 Hz
FIDRES    0.163399 Hz
AQ        2.7262996 sec
RG        251.58
HC         21.58
UH         41.600 usec
DE        18.00 nsec
TE        298.1 K
NUC1       13C
NUC2       1H
SFO1       600.1337038 MHz
SFO2       400.1454000 MHz
AQ1        8.00 usec
TM1        6.1510025 W

```

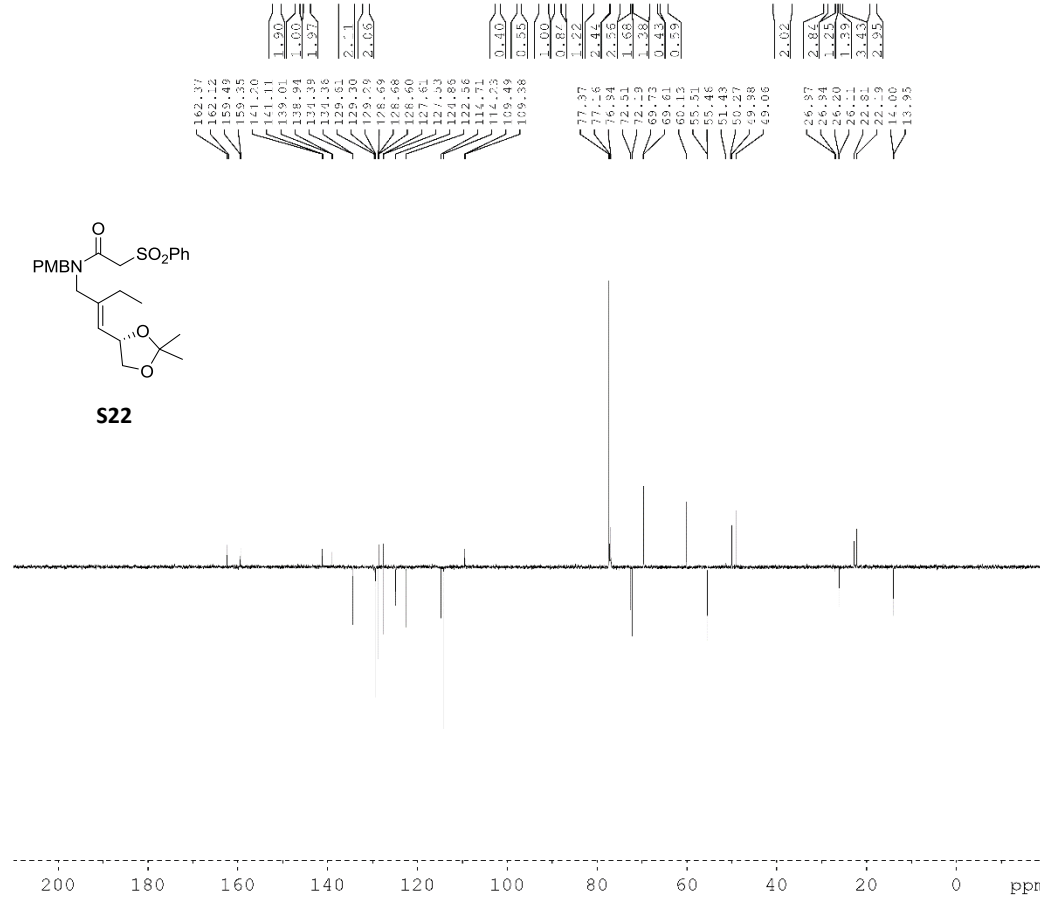

```

Current Date Parameters
NAME      165350
EXPNO     5
PROCNO    1

F2 - Acquisition Parameters
Date_     20120908
Time      11:40
INSTRUM   spect
PROBHD    51 7960_052 (
PULPROG   zgpg30
SOLVENT   CDCl3
NS        16
DS        2
SWH        10039.730 Hz
FIDRES    0.163399 Hz
AQ        2.7262996 sec
RG        251.58
HC         21.58
UH         41.600 usec
DE        18.00 nsec
TE        298.1 K
NUC1       13C
NUC2       1H
SFO1       600.1337038 MHz
SFO2       400.1454000 MHz
AQ1        8.00 usec
TM1        6.1510025 W

```

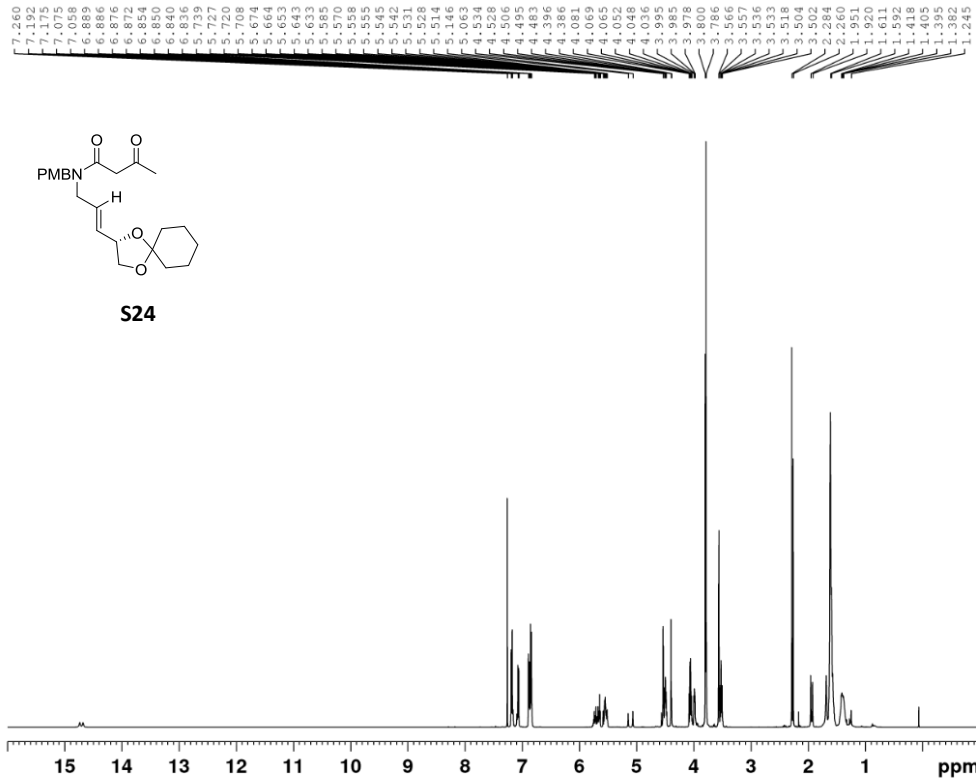

Current Data Parameters  
 NAME JBN394  
 EXPNO 1  
 PROCNO 1

F2 - Acquisition Parameters  
 Date\_ 20170824  
 Time 0.33  
 INSTRUM spect  
 PROBHD 5 mm CPTCI 1H-  
 PULPROG zg30  
 TD 65536  
 SOLVENT CDCl3  
 NS 16  
 DS 2  
 SWH 10000.000 Hz  
 FIDRES 0.152588 Hz  
 AQ 3.2767999 sec  
 RG 16  
 DW 50.000 usec  
 DE 10.00 usec  
 TE 298.2 K  
 D1 1.00000000 sec  
 TDO 1

===== CHANNEL f1 =====  
 SF01 500.2730894 MHz  
 NUC1 1H  
 P1 7.63 usec  
 PLW1 9.50000000 W

F2 - Processing parameters  
 SI 65536  
 SF 500.2700081 MHz  
 WDW EM  
 SSB 0  
 LB 0.30 Hz  
 GB 0  
 PC 1.00

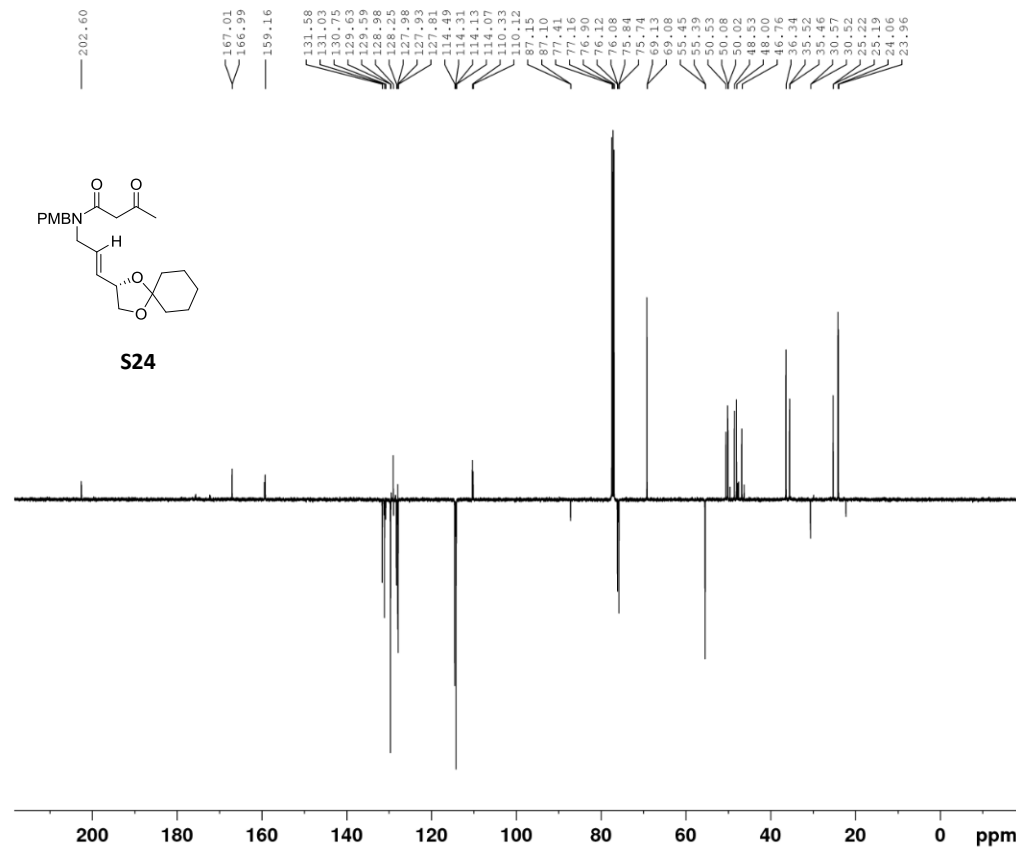

Current Data Parameters  
 NAME JBN394  
 EXPNO 2  
 PROCNO 1

F2 - Acquisition Parameters  
 Date\_ 20170824  
 Time 1.01  
 INSTRUM spect  
 PROBHD 5 mm CPTCI 1H-  
 PULPROG jmod  
 TD 65536  
 SOLVENT CDCl3  
 NS 512  
 DS 4  
 SWH 29761.904 Hz  
 FIDRES 0.454131 Hz  
 AQ 1.1010048 sec  
 RG 1020  
 DW 16.800 usec  
 DE 18.00 usec  
 TE 298.2 K  
 CNST2 145.000000  
 CNST11 1.0000000  
 D1 2.00000000 sec  
 D20 0.00689655 sec  
 TDO 1

===== CHANNEL f1 =====  
 SF01 125.8055709 MHz  
 NUC1 13C  
 P1 14.00 usec  
 P2 28.00 usec  
 PLW1 90.00000000 W

===== CHANNEL f2 =====  
 SF02 500.2720011 MHz  
 NUC2 1H  
 CPDPRG2 waltz16  
 PCPD2 80.00 usec  
 PLW2 9.50000000 W  
 PLW12 0.08641600 W

F2 - Processing parameters  
 SI 32768  
 SF 125.7929782 MHz  
 WDW EM  
 SSB 0  
 LB 1.00 Hz  
 GB 0  
 PC 1.40

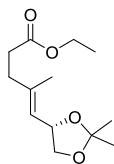

S26

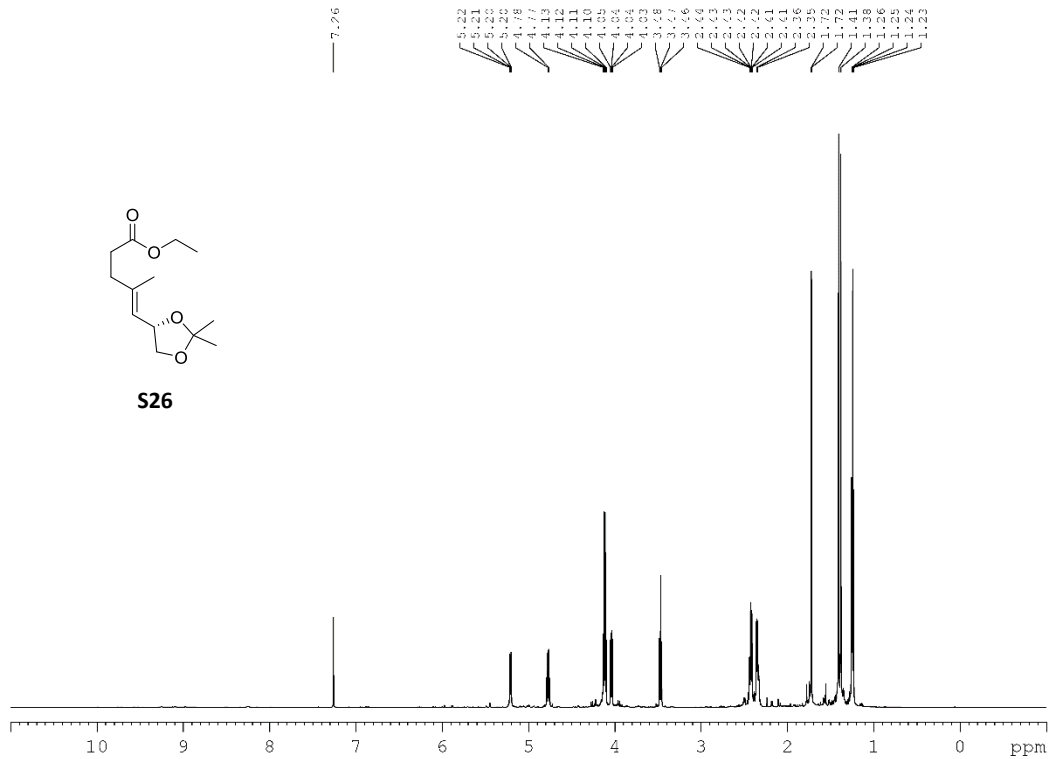

Current Data Parameters  
NAME S26-001  
EXPNO 2  
PROCNO 1

F2 - Acquisition Parameters  
Date\_ 20180807  
Time 15:47 h  
INSTRUM spect  
PROBHD 517368\_0047 1  
PULPROG zgpg30  
TD 65536  
SOLVENT CDCl3  
NS 512  
DS 4  
SWH 36201.863 Hz  
FIDRES 0.552053 Hz  
AQ 0.593998 sec  
RG 159.43  
FM 13.800 usec  
DE 15.00 usec  
TE 298.2 K  
CQPC2 145.000000  
CQPC1 130.000000  
DE 2.000000000 sec  
DQ 3.906895000 sec  
LPC 1  
SFO1 50.13780000 MHz  
SFO2 130  
F1 1.00 usec  
F2 24.00 usec  
F3 88.12559792 K  
SFO2 600.1324003 MHz  
AQPC2 5  
CQPC2 82.00 usec  
SFO2 6.16100018 MHz  
SFO1 6.76100018 MHz

F2 - Processing parameters  
SI 65536  
SF 600.1324003 MHz  
WDW EM  
SSB 0  
GB 0  
PC 1.00

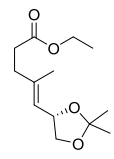

S26

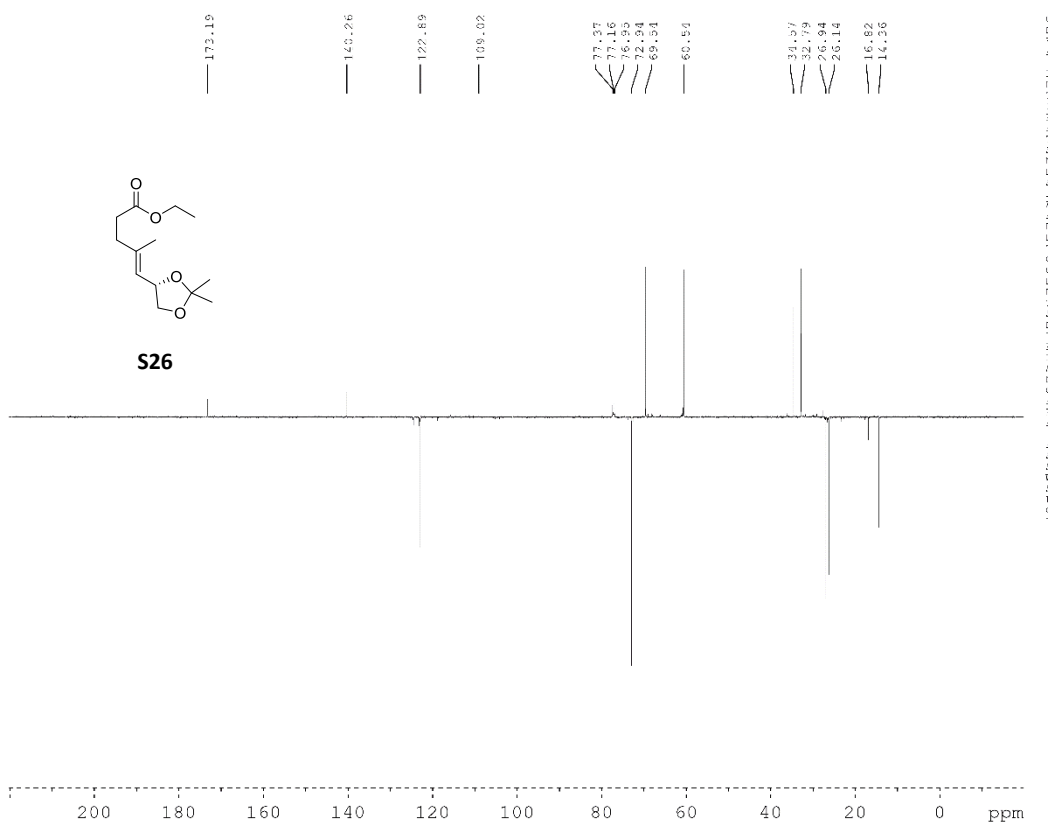

Current Data Parameters  
NAME S26-001  
EXPNO 2  
PROCNO 1

F2 - Acquisition Parameters  
Date\_ 20180807  
Time 16:16 h  
INSTRUM spect  
PROBHD 517368\_0047 1  
PULPROG zgpg30  
TD 65536  
SOLVENT CDCl3  
NS 512  
DS 4  
SWH 36201.863 Hz  
FIDRES 0.552053 Hz  
AQ 0.593998 sec  
RG 159.43  
FM 13.800 usec  
DE 15.00 usec  
TE 298.2 K  
CQPC2 145.000000  
CQPC1 130.000000  
DE 2.000000000 sec  
DQ 3.906895000 sec  
LPC 1  
SFO1 50.13780000 MHz  
SFO2 130  
F1 1.00 usec  
F2 24.00 usec  
F3 88.12559792 K  
SFO2 600.1324003 MHz  
AQPC2 5  
CQPC2 82.00 usec  
SFO2 6.16100018 MHz  
SFO1 6.76100018 MHz

F2 - Processing parameters  
SI 65536  
SF 600.1324003 MHz  
WDW EM  
SSB 0  
GB 0  
PC 1.00

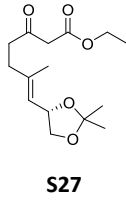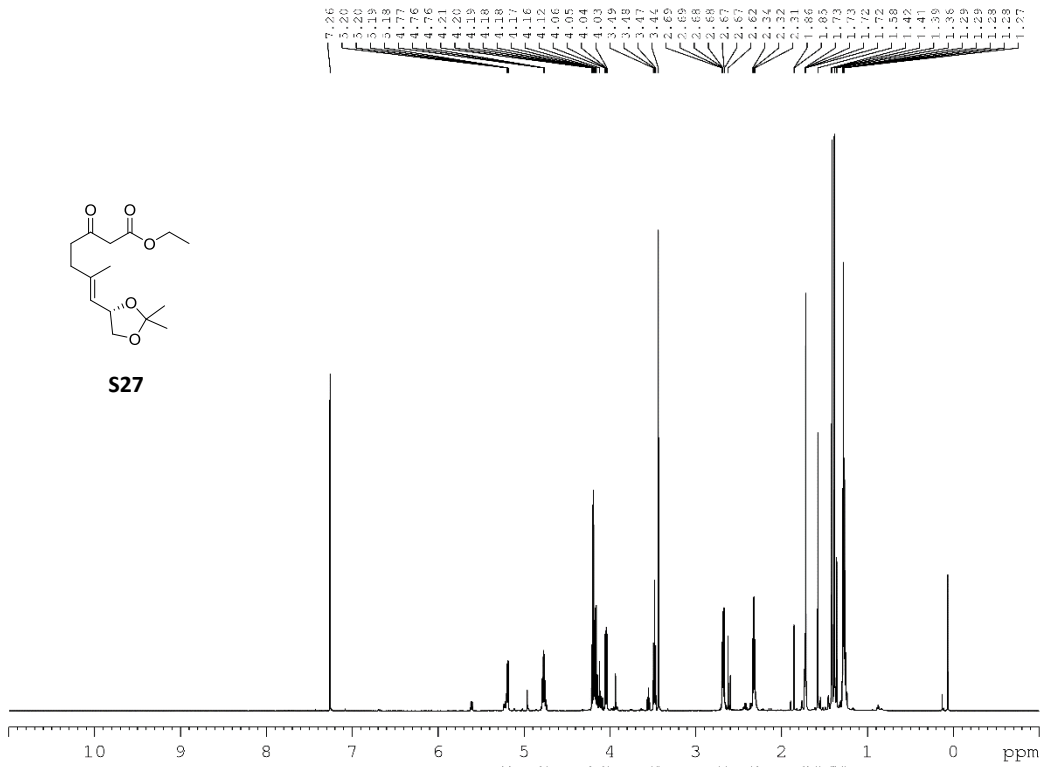

Current Data Parameters  
 NAME: S27168C  
 EXPNO: 1  
 PROCNO: 1

F2 - Acquisition Parameters  
 Date\_: 20180807  
 Time: 16.33  
 INSTRUM: spect  
 PROBHD: Z117768\_0667\_1  
 PULPROG: zgpg30  
 TD: 65536  
 SFOFREQ: 600.138  
 NS: 16  
 DS: 4  
 SWH: 12079.250 Hz  
 FIDRES: 0.183393 Hz  
 AQ: 2.7262278 sec  
 RG: 22.17  
 DA: 41.600 usec  
 DP: 18.00 usec  
 RF: 398.1 K  
 DI: 1.00000000 usec  
 LEO: 1  
 SFO1: 600.138058 MHz  
 NUC1: 13  
 P1: 8.00 usec  
 PLW1: 6.76100016 W

F3 - Processing parameters  
 SI: 65536  
 SF: 600.138048 MHz  
 WDW: EM  
 SSB: 0  
 LB: 0.50 Hz  
 GB: 0  
 PC: 1.00

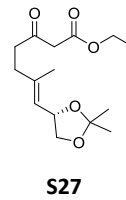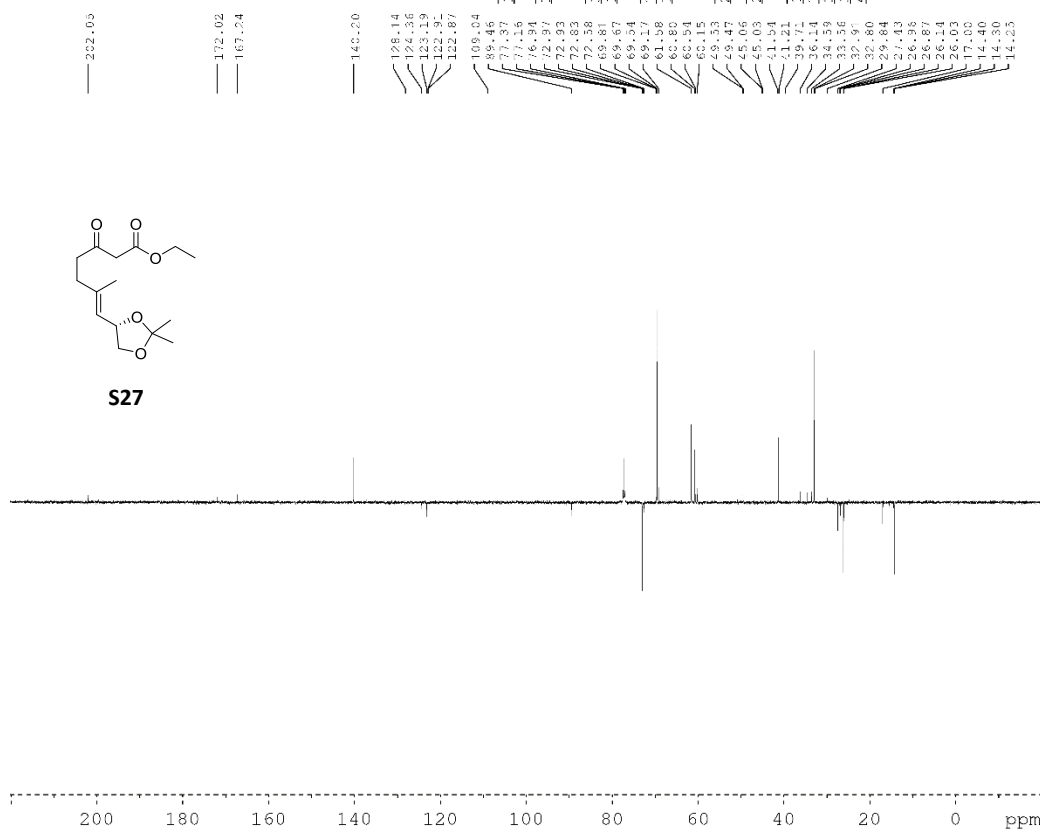

Current Data Parameters  
 NAME: S27168C  
 EXPNO: 2  
 PROCNO: 1

F2 - Acquisition Parameters  
 Date\_: 20180807  
 Time: 7.05  
 INSTRUM: spect  
 PROBHD: Z117768\_0667\_1  
 PULPROG: zgpg30  
 TD: 65536  
 SFOFREQ: 600.138  
 NS: 312  
 DS: 4  
 SWH: 36231.883 Hz  
 FIDRES: 0.552255 Hz  
 AQ: 0.3063948 sec  
 RG: 139.65  
 DA: 13.800 usec  
 DP: 8.00 usec  
 RF: 398.1 K  
 DI: 1.00000000 usec  
 LEO: 1  
 SFO1: 600.138058 MHz  
 NUC1: 13C  
 P1: 24.00 usec  
 PLW1: 82.72599932 W  
 SFO2: 600.138048 MHz  
 NUC2: 1H  
 SFO3: 398.1 K  
 P2: 8.00 usec  
 PLW2: 6.76100016 W  
 P2F2: 0.3063948 W

F3 - Processing parameters  
 SI: 65536  
 SF: 600.138048 MHz  
 WDW: EM  
 SSB: 0  
 LB: 1.00 Hz  
 GB: 0  
 PC: 1.40

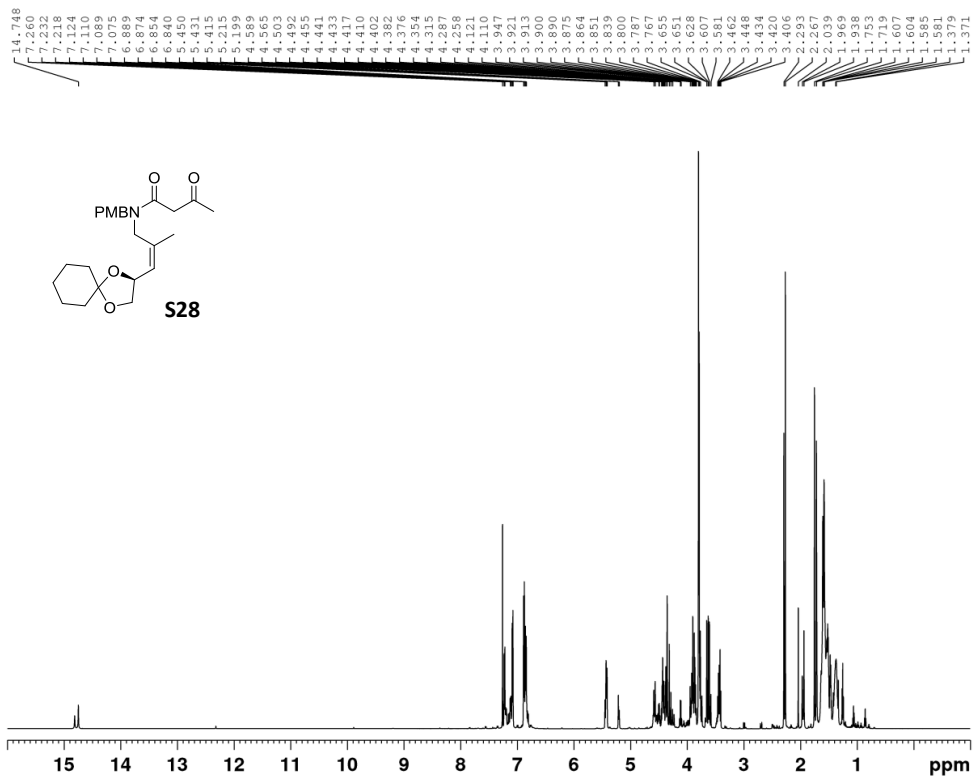

Current Data Parameters  
 NAME JBN474  
 EXPNO 1  
 PROCNO 1

F2 - Acquisition Parameters  
 Date\_ 20180130  
 Time 15.07 h  
 INSTRUM spect  
 PROBHD Z117768\_0067 ( )  
 PULPROG zg30  
 TD 65536  
 SOLVENT CDCl3  
 NS 16  
 DS 2  
 SWH 12019.230 Hz  
 FIDRES 0.183399 Hz  
 AQ 2.7262976 sec  
 RG 15.93  
 DW 41.600 usec  
 DE 18.00 usec  
 TE 298.0 K  
 D1 1.00000000 sec  
 TD0 1  
 SFO1 600.1337058 MHz  
 NUC1 1H  
 P1 8.00 usec  
 PLW1 6.76100016 W

F2 - Processing parameters  
 SI 65536  
 SF 600.1300144 MHz  
 WDW EM  
 SSB 0  
 LB 0.30 Hz  
 GB 0  
 PC 1.00

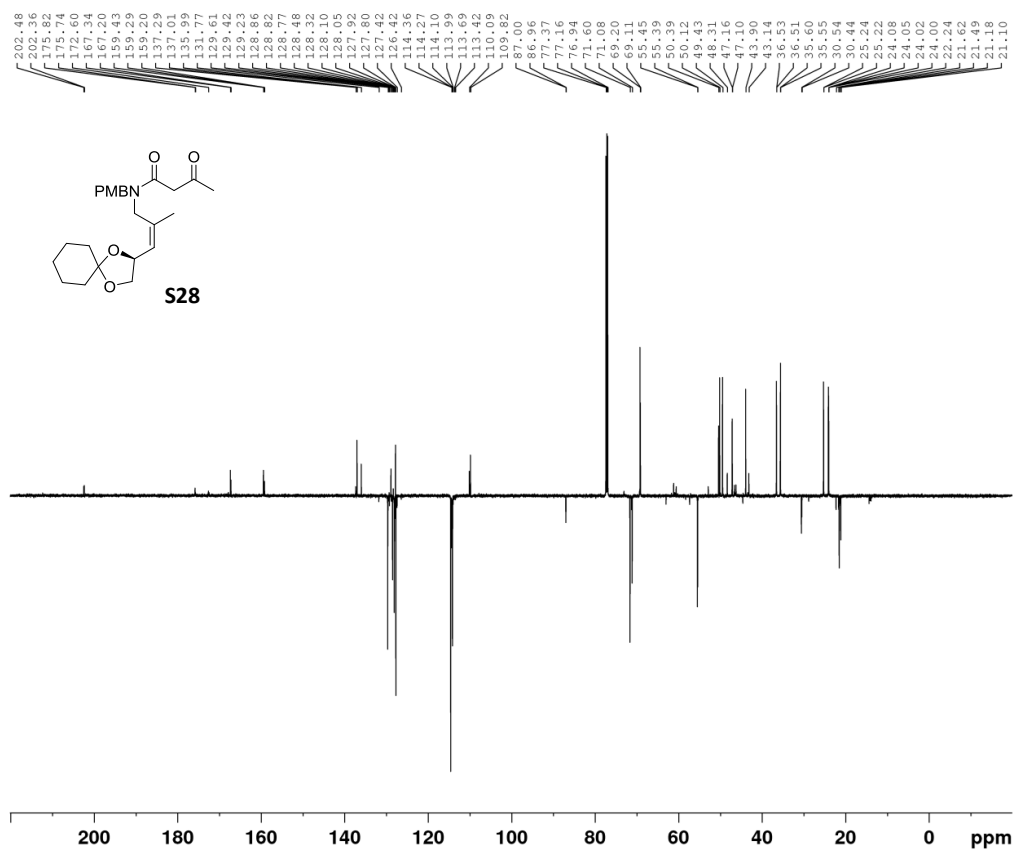

Current Data Parameters  
 NAME JBN474  
 EXPNO 2  
 PROCNO 1

F2 - Acquisition Parameters  
 Date\_ 20180130  
 Time 15.33 h  
 INSTRUM spect  
 PROBHD Z117768\_0067 ( )  
 PULPROG jmod  
 TD 65536  
 SOLVENT CDCl3  
 NS 512  
 DS 4  
 SWH 36231.883 Hz  
 FIDRES 0.552835 Hz  
 AQ 0.9043968 sec  
 RG 199.43  
 DW 13.800 usec  
 DE 18.00 usec  
 TE 298.0 K  
 CNST2 145.0000000  
 CNST11 1.0000000  
 D1 2.00000000 sec  
 D20 0.00689655 sec  
 TD0 1  
 SFO1 150.9178988 MHz  
 NUC1 13C  
 P1 12.00 usec  
 P2 24.00 usec  
 PLW1 88.22599792 W  
 SFO2 600.1324005 MHz  
 NUC2 1H  
 CPDPRG2 waltz16  
 PCPD2 80.00 usec  
 PLW2 6.76100016 W  
 PLW12 0.06699187 W

F2 - Processing parameters  
 SI 32768  
 SF 150.9027898 MHz  
 WDW EM  
 SSB 0  
 LB 1.00 Hz  
 GB 0  
 PC 1.40

# Diacetates

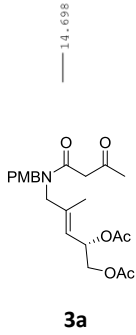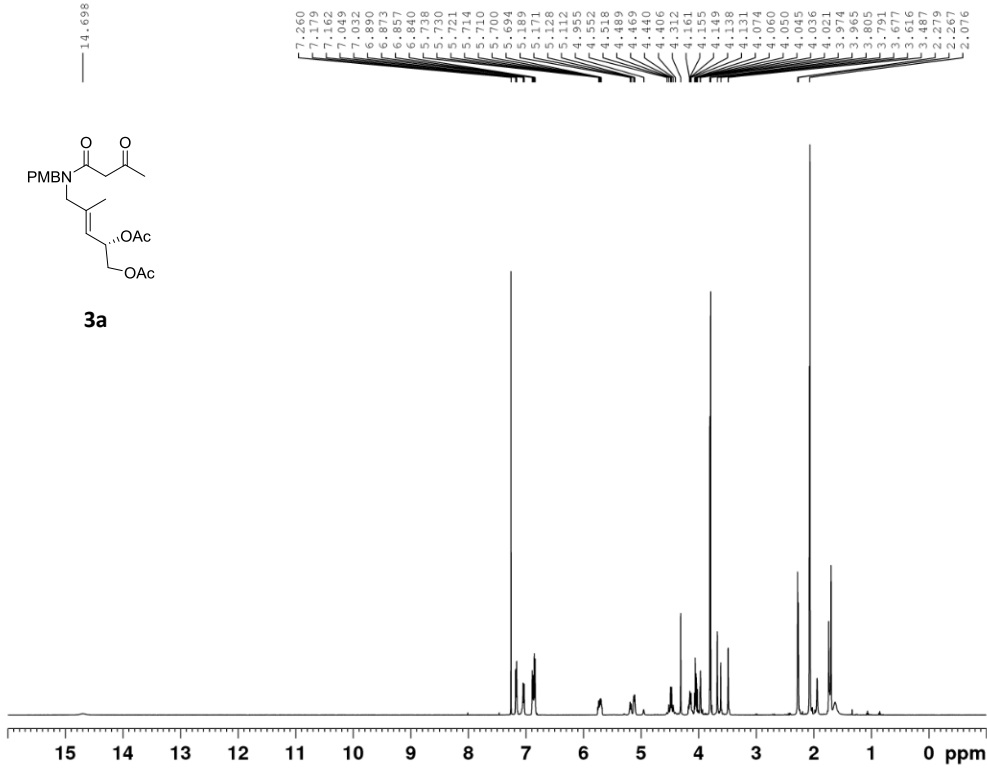

Current Data Parameters  
 NAME JBN360  
 EXPNO 1  
 PROCNO 1  
 F2 - Acquisition Parameters  
 Date\_ 20170725  
 Time 9.23  
 INSTRUM spect  
 PROBHD 5 mm CPTCI 1H-  
 PULPROG zg30  
 TD 65536  
 SOLVENT CDCl3  
 NS 16  
 DS 2  
 SWH 10000.000 Hz  
 FIDRES 0.152588 Hz  
 AQ 3.2767999 sec  
 RG 16  
 DW 50.000 usec  
 DE 10.00 usec  
 TE 297.7 K  
 D1 1.00000000 sec  
 TDO 1  
 ===== CHANNEL f1 =====  
 SFO1 500.2730894 MHz  
 NUC1 1H  
 P1 7.63 usec  
 PLW1 9.50000000 W  
 F2 - Processing parameters  
 SI 65536  
 SF 500.2700079 MHz  
 WDW EM  
 SSB 0  
 LB 0.30 Hz  
 GB 0  
 PC 1.00

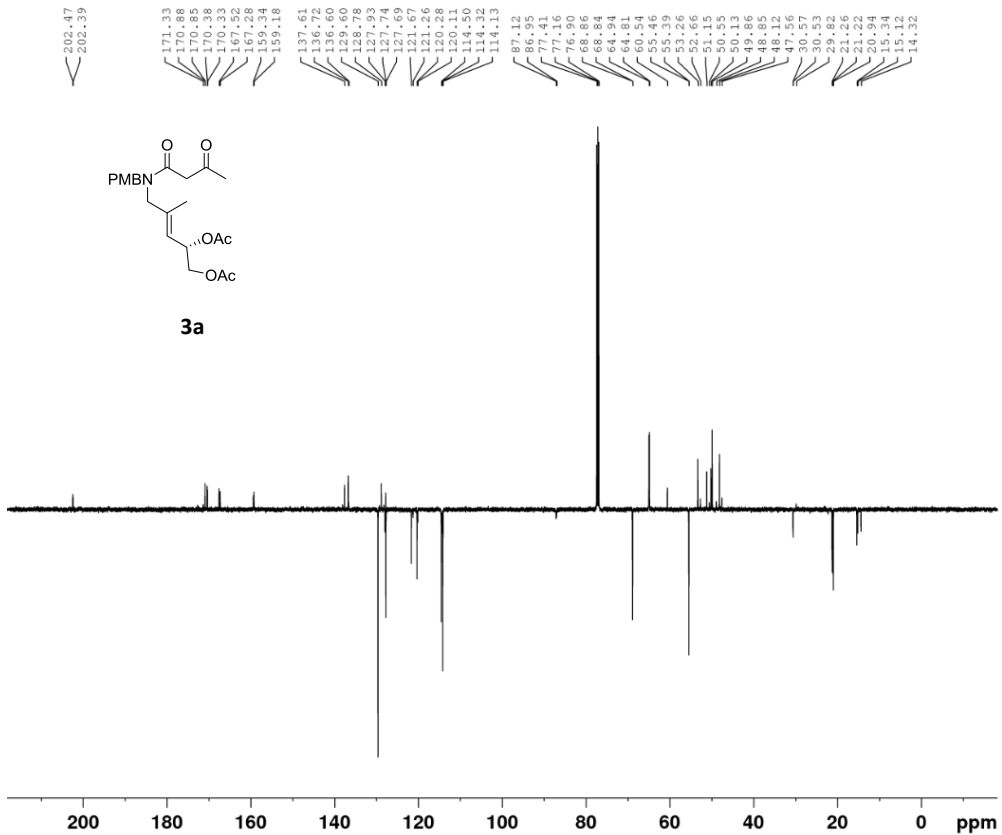

Current Data Parameters  
 NAME JBN260  
 EXPNO 3  
 PROCNO 1  
 F2 - Acquisition Parameters  
 Date\_ 20160429  
 Time 3.43  
 INSTRUM spect  
 PROBHD 5 mm CPTCI 1H-  
 PULPROG jmod  
 TD 65536  
 SOLVENT CDCl3  
 NS 512  
 DS 4  
 SWH 29761.904 Hz  
 FIDRES 0.454131 Hz  
 AQ 1.1010048 sec  
 RG 2050  
 DW 16.800 usec  
 DE 6.50 usec  
 TE 296.2 K  
 CNST2 145.0000000  
 CNST11 1.0000000  
 D1 2.00000000 sec  
 D20 0.00689655 sec  
 TDO 1  
 ===== CHANNEL f1 =====  
 NUC1 13C  
 F1 11.20 usec  
 P2 22.40 usec  
 PL1 -2.00 dB  
 PL1W 88.77790070 W  
 SFO1 125.8055709 MHz  
 ===== CHANNEL f2 =====  
 CPDPRG2 waltz16  
 NUC2 1H  
 FCPD2 80.00 usec  
 PL2 4.00 dB  
 PL12 25.28 dB  
 PL2W 8.72000027 W  
 PL12W 0.05494062 W  
 SFO2 500.2720011 MHz  
 F2 - Processing parameters  
 SI 32768  
 SF 125.7929782 MHz  
 WDW EM  
 SSB 0  
 LB 1.00 Hz  
 GB 0  
 PC 1.40

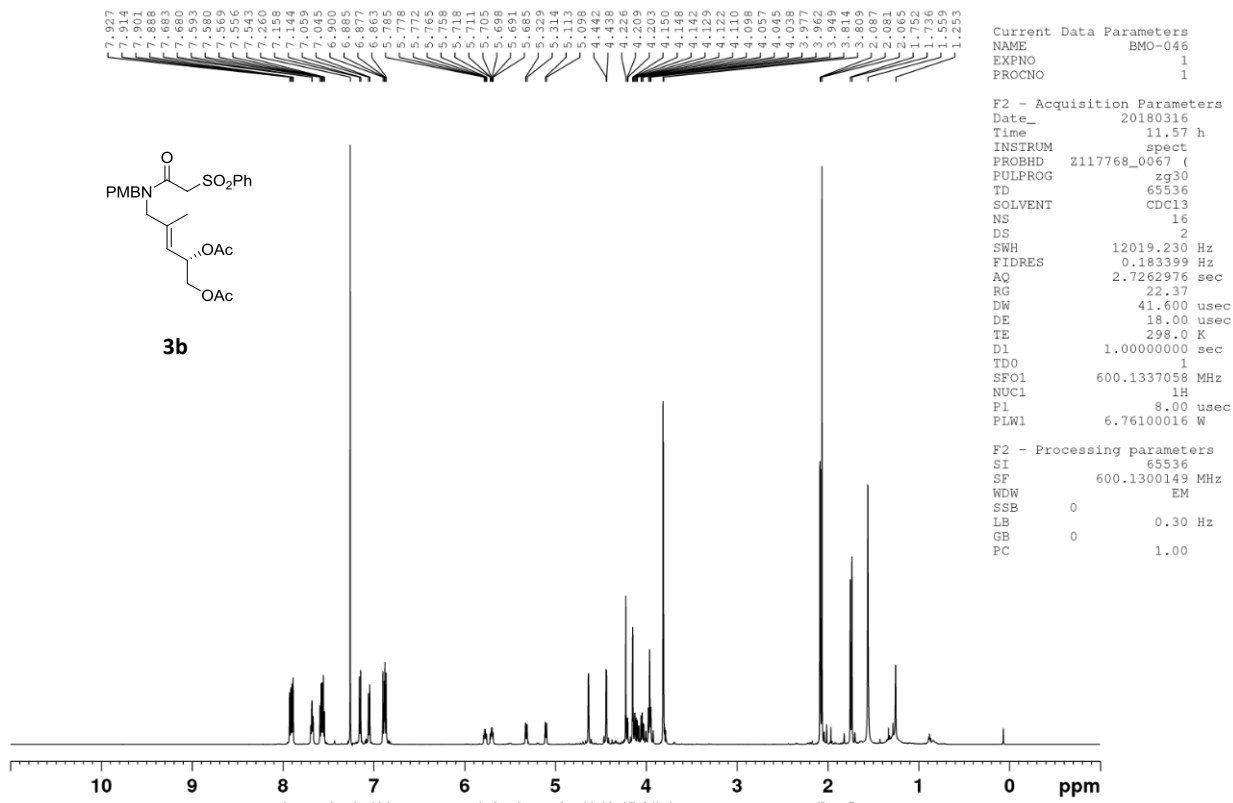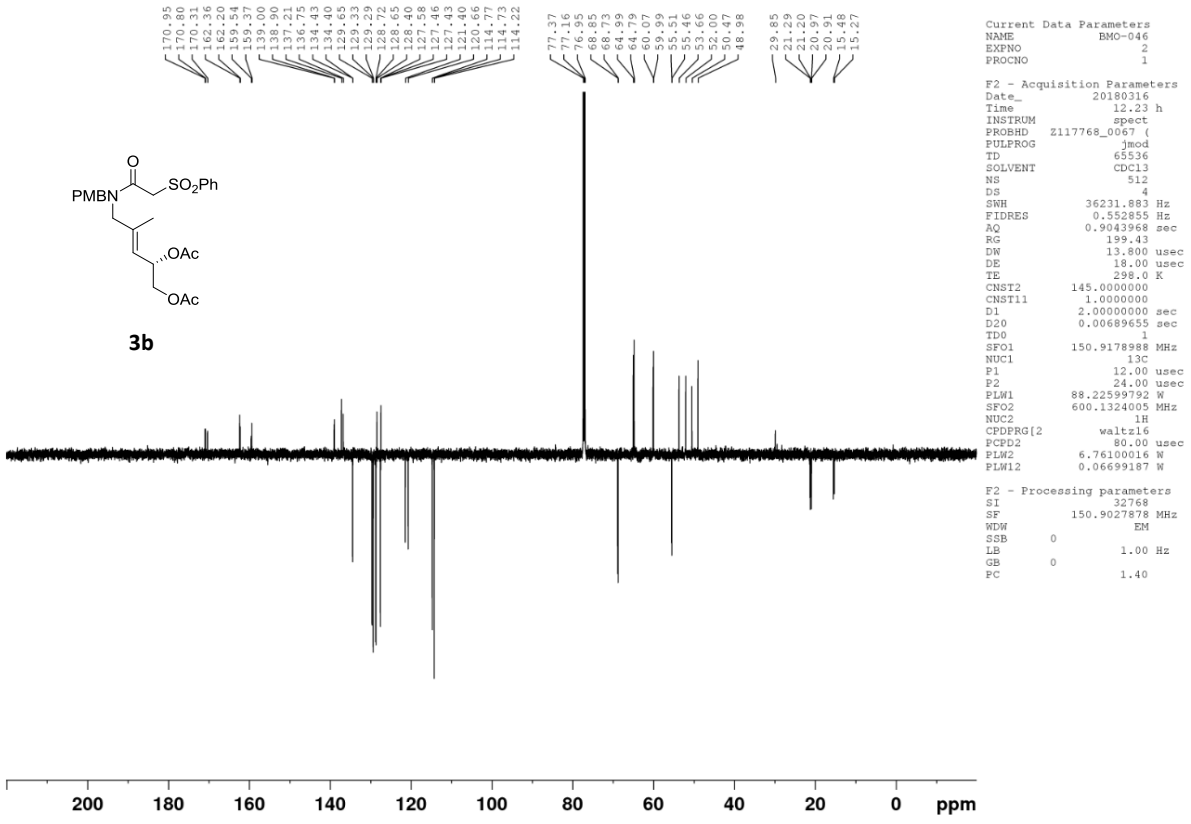

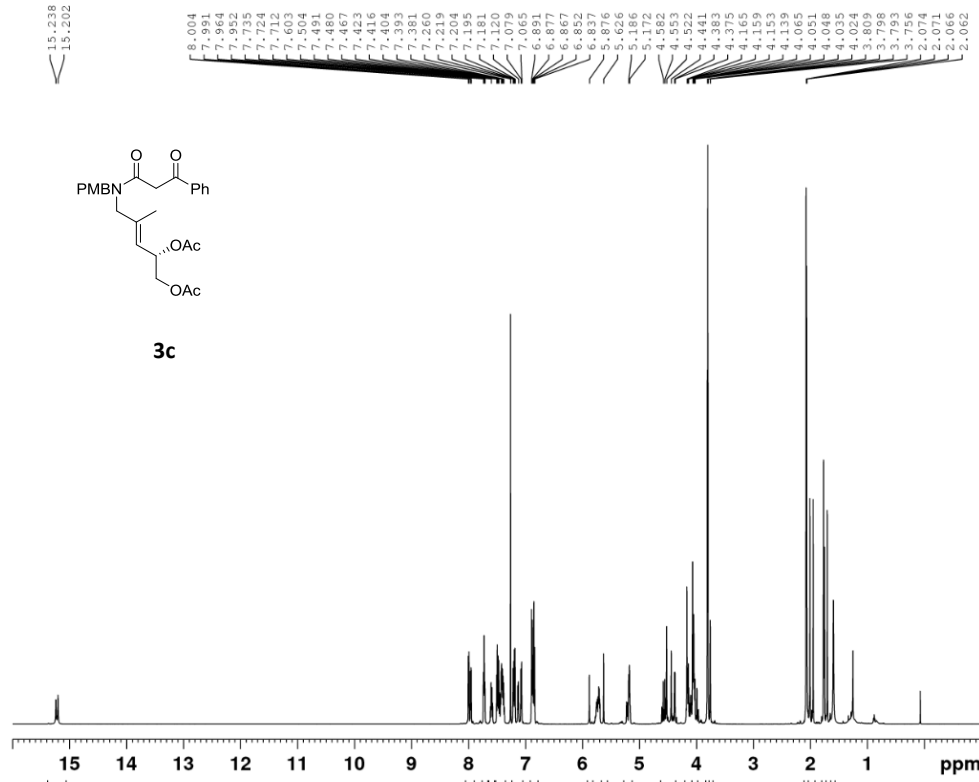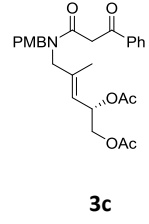

Current Data Parameters  
 NAME BMO-033  
 EXPNO 1  
 PROCNO 1

F2 - Acquisition Parameters  
 Date\_ 20180316  
 Time 10.56 h  
 INSTRUM spect  
 PROBHD Z117768\_0067 (  
 PULPROG zg30  
 TD 65536  
 SOLVENT CDCl3  
 NS 16  
 DS 2  
 SWH 12019.230 Hz  
 FIDRES 0.183399 Hz  
 AQ 2.7262976 sec  
 RG 22.37  
 DW 41.600 usec  
 DE 18.00 usec  
 TE 298.0 K  
 D1 1.00000000 sec  
 TD0 1  
 SFO1 600.1337058 MHz  
 NUC1 1H  
 P1 8.00 usec  
 PLW1 6.76100016 W

F2 - Processing parameters  
 SI 65536  
 SF 600.1300147 MHz  
 WDW EM  
 SSB 0  
 LB 0.30 Hz  
 GB 0  
 PC 1.00

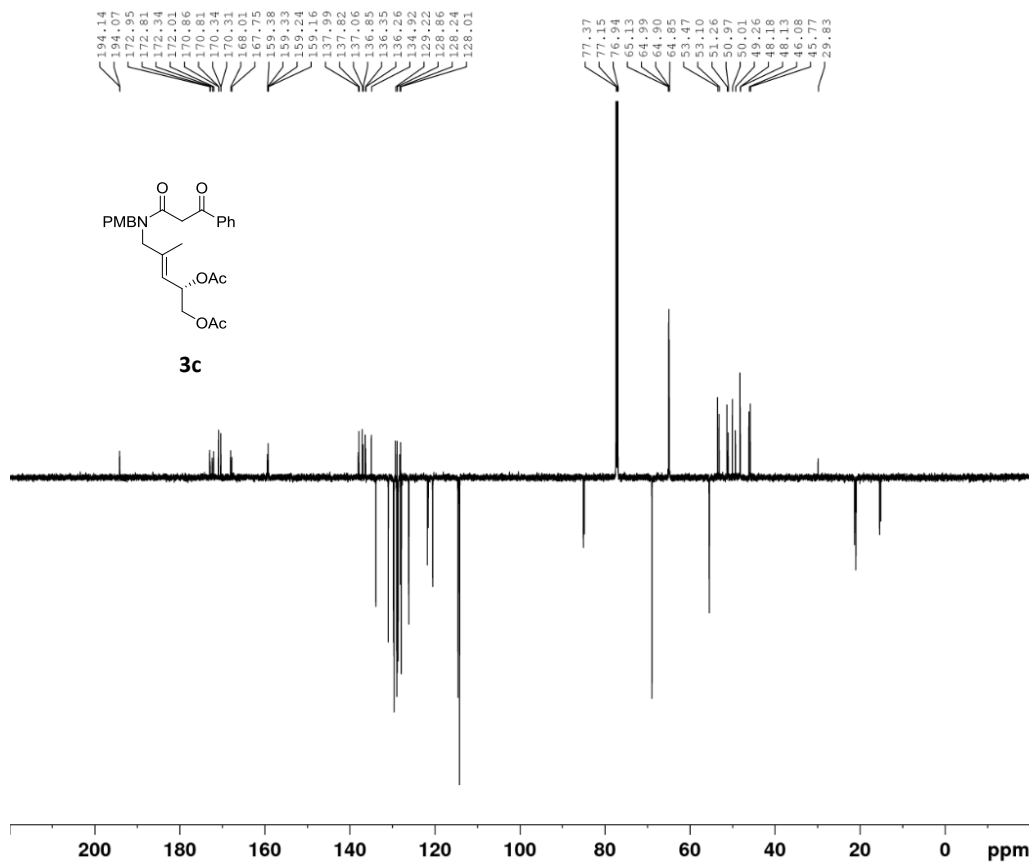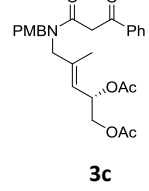

Current Data Parameters  
 NAME BMO-033  
 EXPNO 2  
 PROCNO 1

F2 - Acquisition Parameters  
 Date\_ 20180316  
 Time 11.23 h  
 INSTRUM spect  
 PROBHD Z117768\_0067 (  
 PULPROG jmod  
 TD 65536  
 SOLVENT CDCl3  
 NS 512  
 DS 4  
 SWH 36231.883 Hz  
 FIDRES 0.552855 Hz  
 AQ 0.9043968 sec  
 RG 199.43  
 DW 13.800 usec  
 DE 18.00 usec  
 TE 298.0 K  
 CNST2 145.0000000  
 CNST11 1.0000000  
 D1 2.00000000 sec  
 D20 0.00689655 sec  
 TD0 1  
 SFO1 150.9178988 MHz  
 NUC1 13C  
 P1 12.00 usec  
 P2 24.00 usec  
 PLW1 88.22599792 W  
 SFO2 600.1324005 MHz  
 NUC2 1H  
 CPDPRG[2] waltz16  
 PCPD2 80.00 usec  
 PLW2 6.76100016 W  
 PLW12 0.06699187 W

F2 - Processing parameters  
 SI 32768  
 SF 150.9027900 MHz  
 WDW EM  
 SSB 0  
 LB 1.00 Hz  
 GB 0  
 PC 1.40



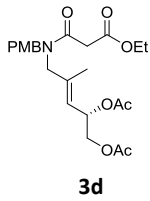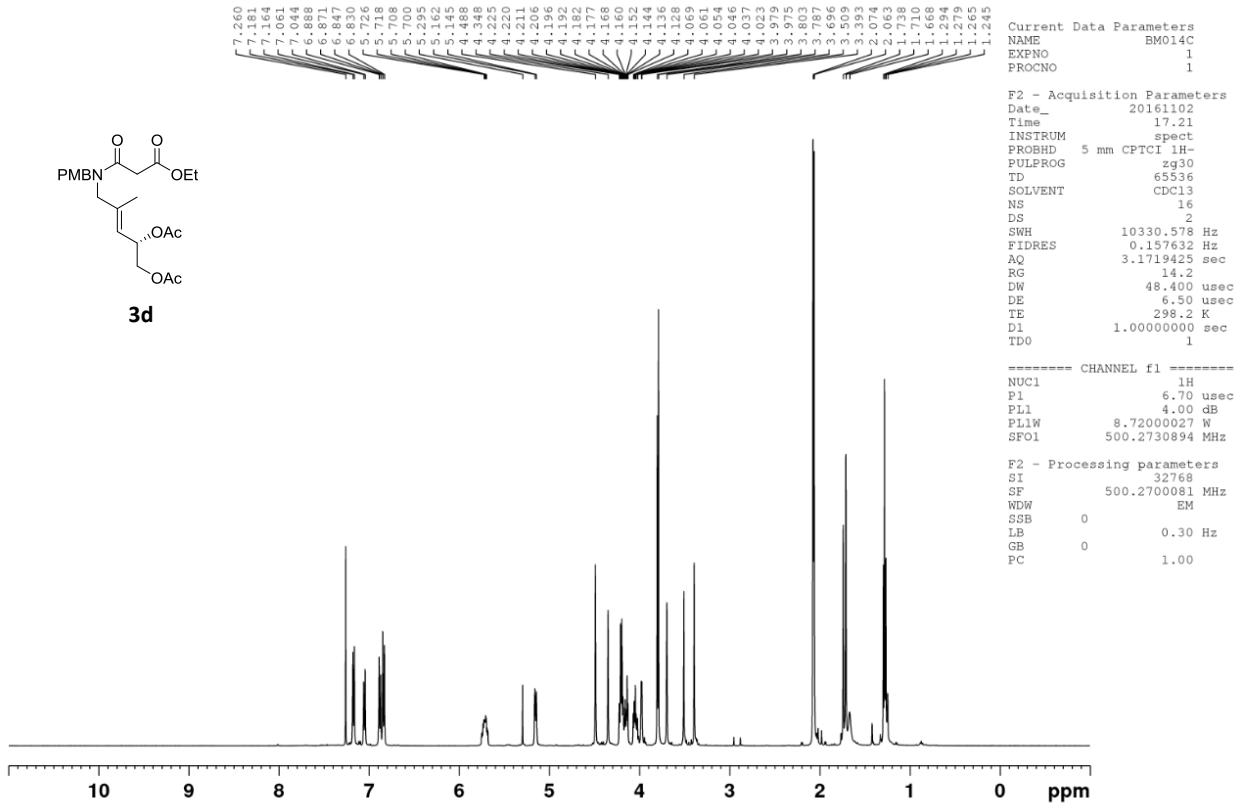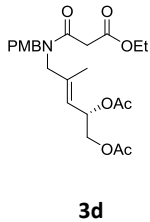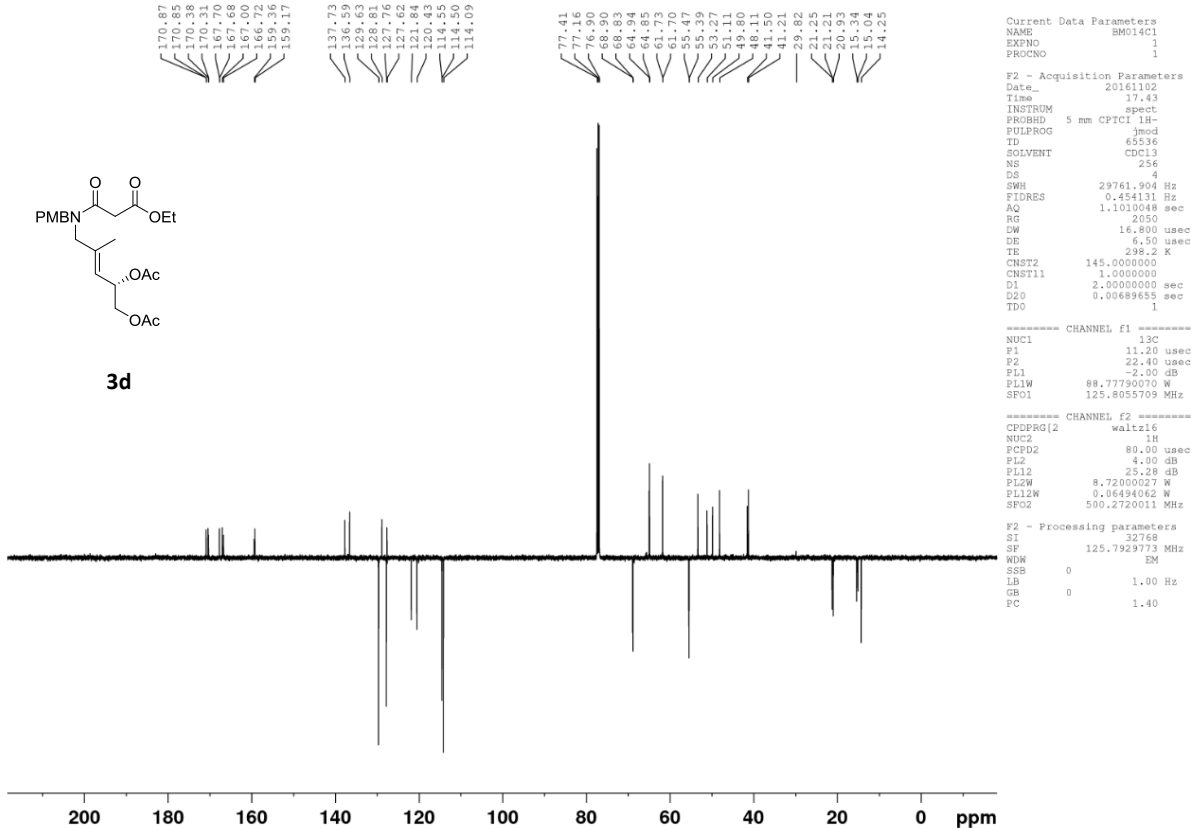

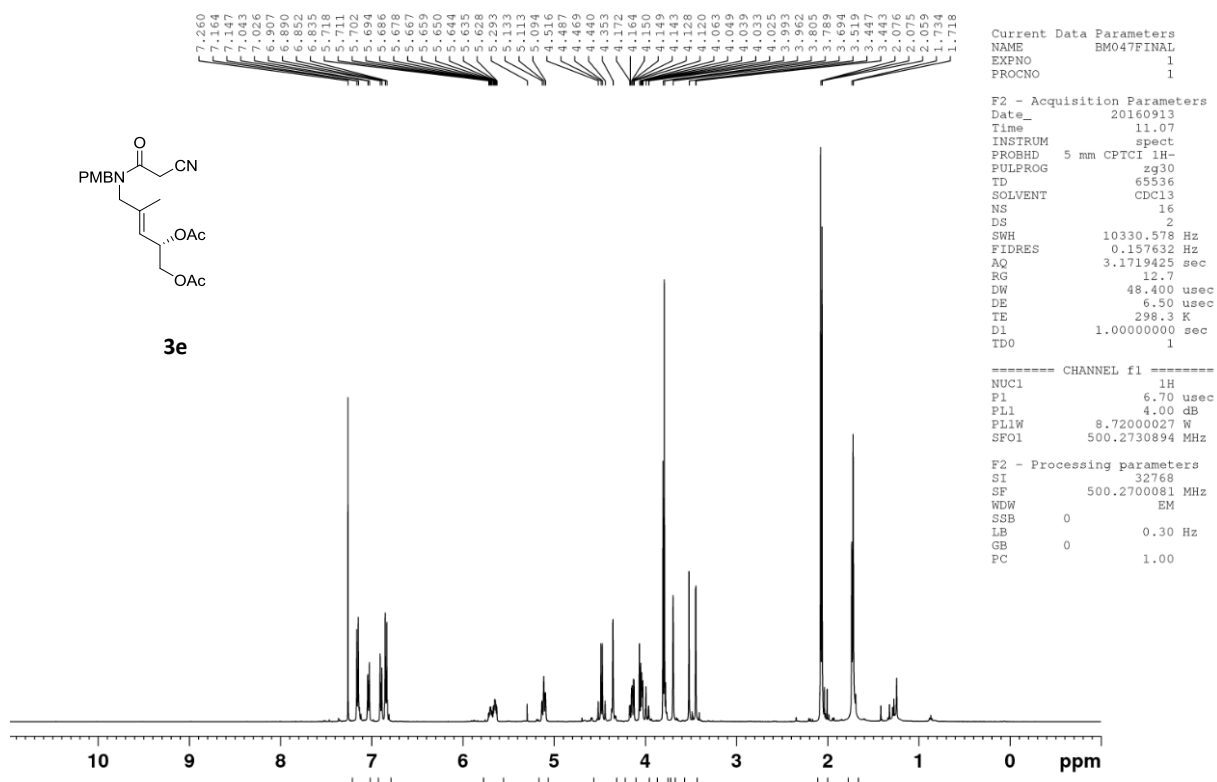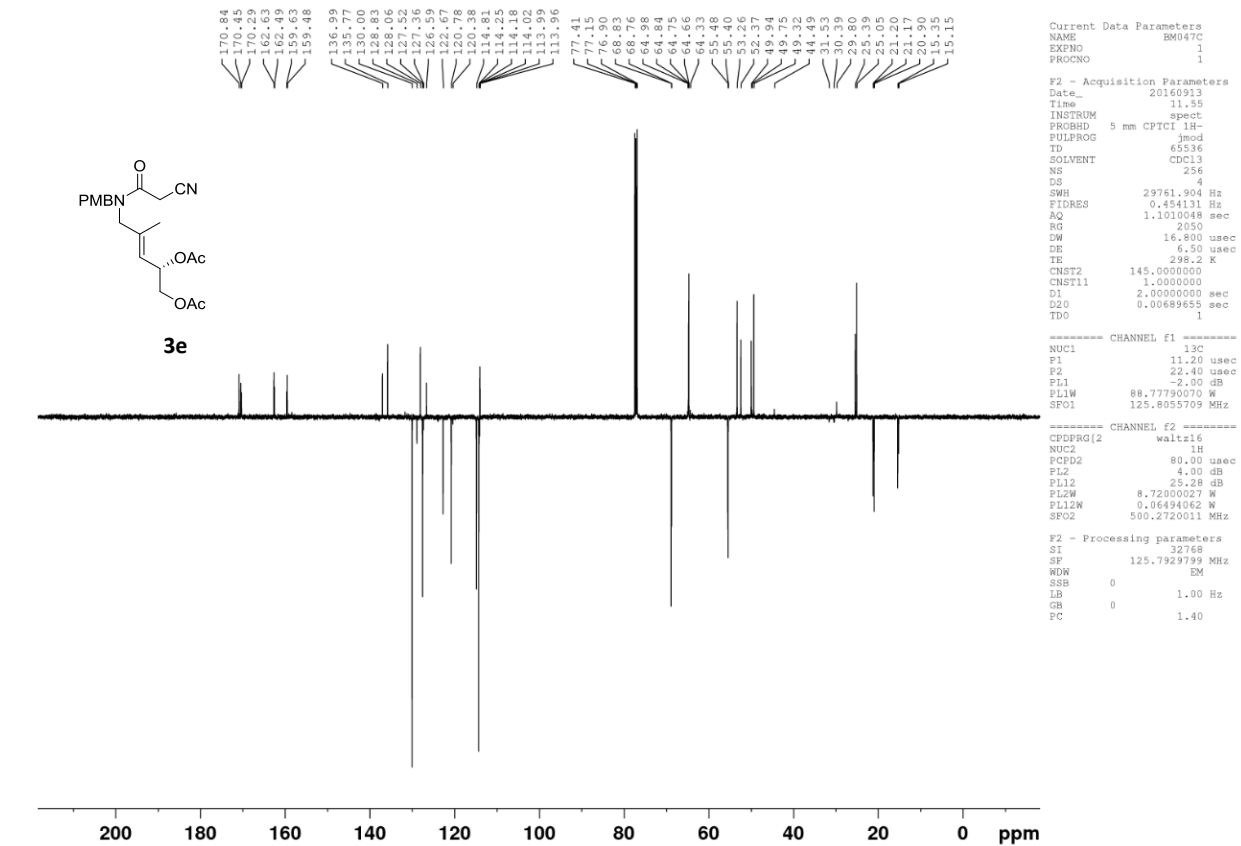

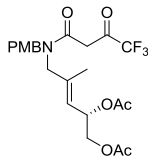

3f

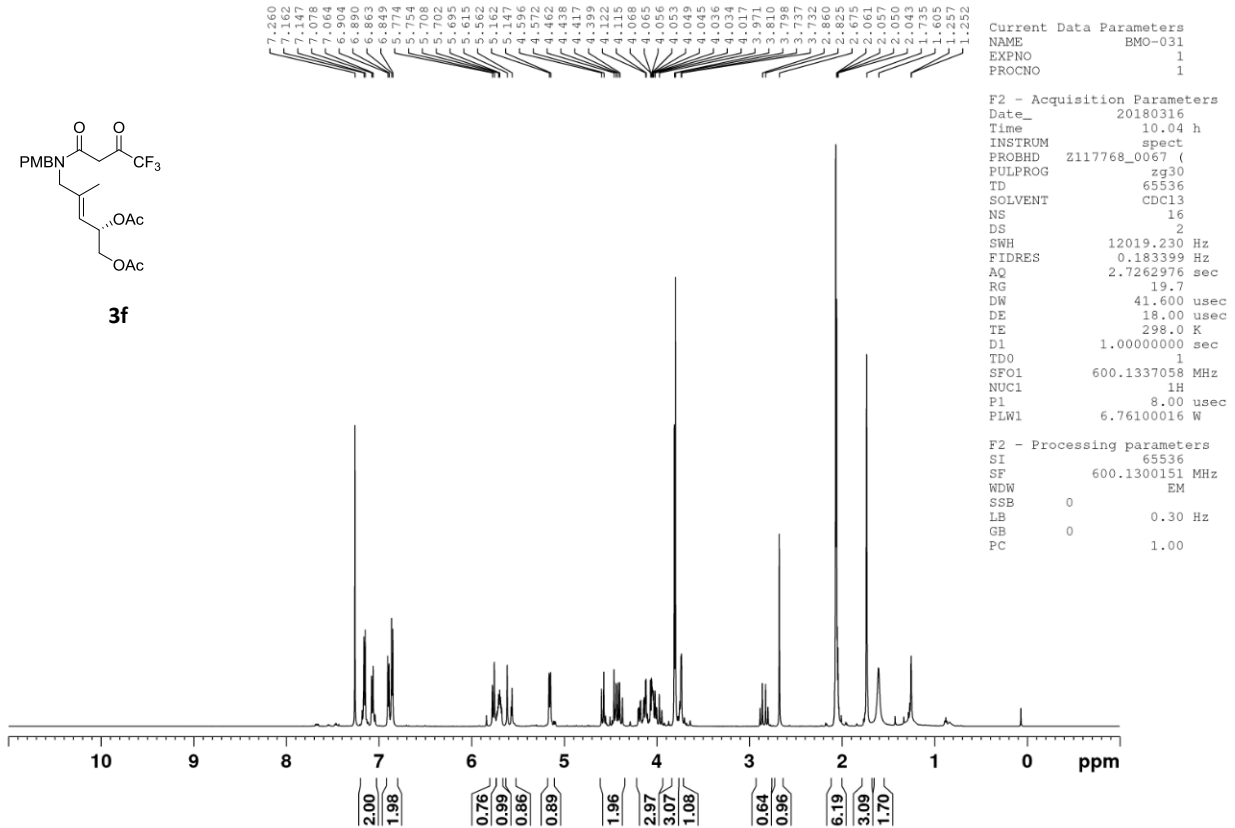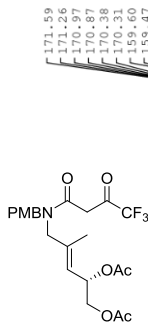

3f

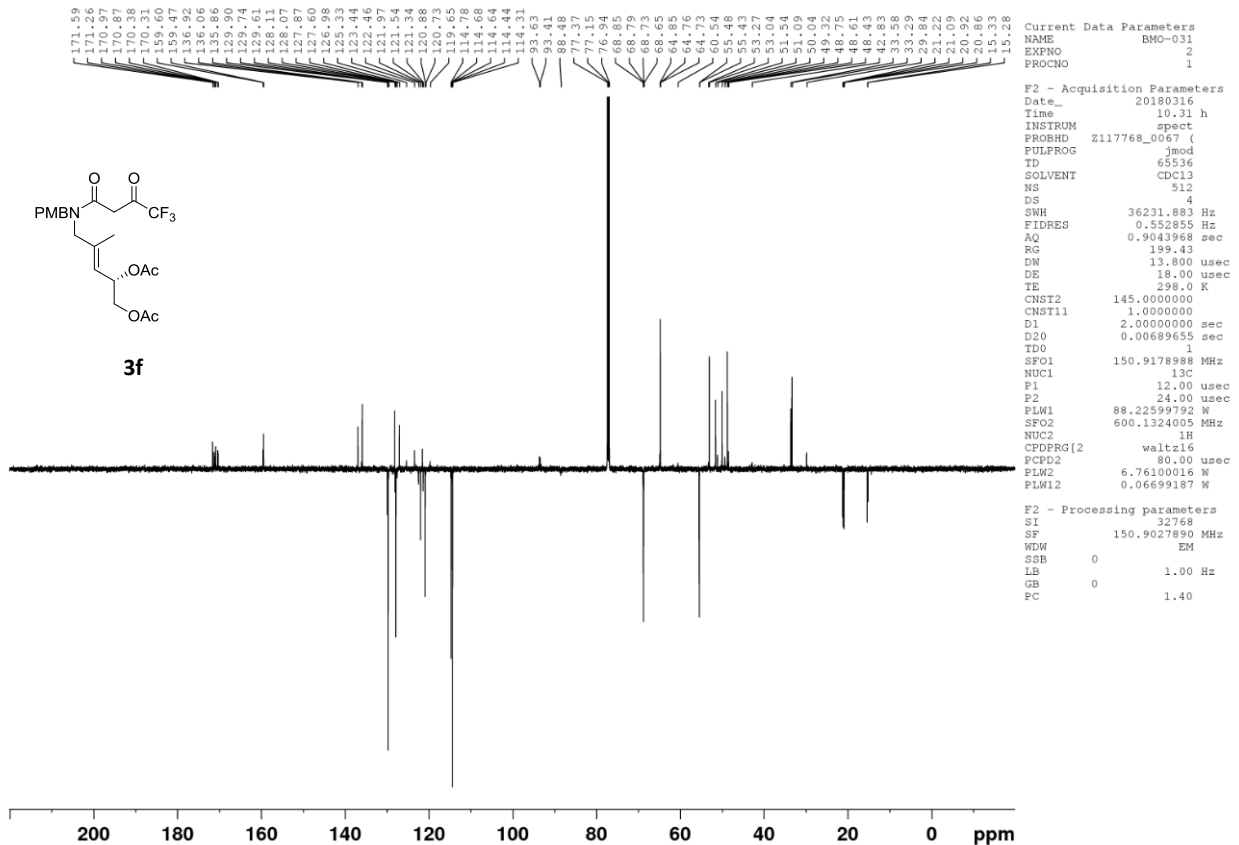

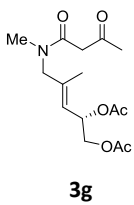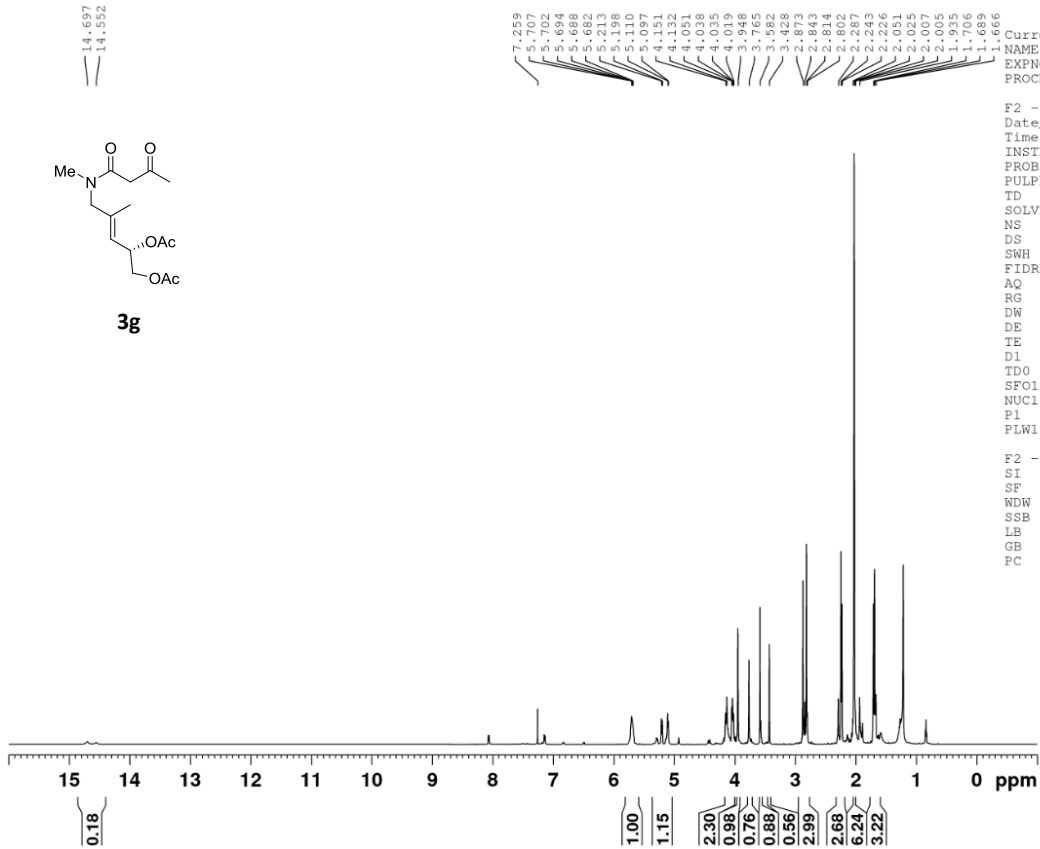

Current Data Parameters  
 NAME JBN468  
 EXPNO 1  
 PROCNO 1  
 F2 - Acquisition Parameters  
 Date\_ 20171213  
 Time 16.07 h  
 INSTRUM spect  
 PROBHD Z117768\_0067 (  
 PULPROG zg30  
 TD 65536  
 SOLVENT CDCl3  
 NS 16  
 DS 2  
 SWH 12019.230 Hz  
 FIDRES 0.183399 Hz  
 AQ 2.7262976 sec  
 RG 9.89  
 DW 41.600 usec  
 DE 18.00 usec  
 TE 298.0 K  
 D1 1.00000000 sec  
 TDO 1  
 SFO1 600.1337058 MHz  
 NUC1 1H  
 P1 8.00 usec  
 PLW1 6.76100016 W  
 F2 - Processing parameters  
 SI 65536  
 SF 600.1300153 MHz  
 WDW EM  
 SSB 0  
 LB 0.30 Hz  
 GB 0  
 PC 1.00

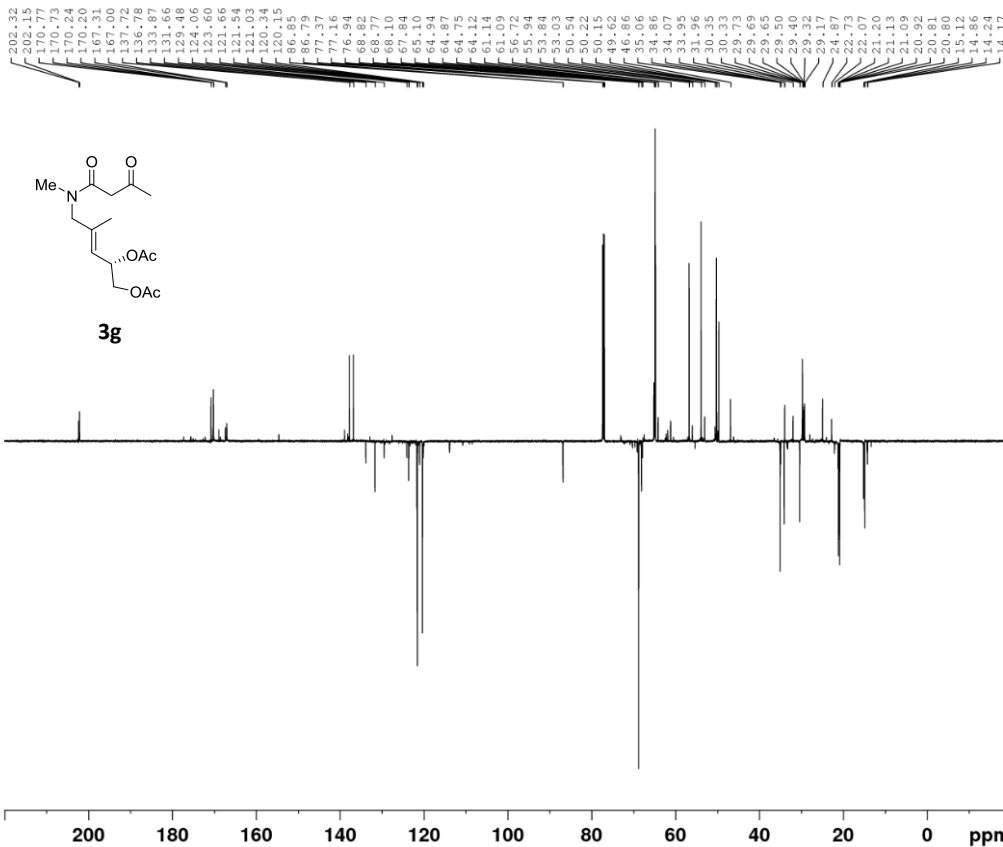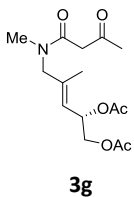

Current Data Parameters  
 NAME JBN468  
 EXPNO 2  
 PROCNO 1  
 F2 - Acquisition Parameters  
 Date\_ 20171213  
 Time 16.33 h  
 INSTRUM spect  
 PROBHD Z117768\_0067 (  
 PULPROG jmod  
 TD 65536  
 SOLVENT CDCl3  
 NS 512  
 DS 4  
 SWH 36231.883 Hz  
 FIDRES 0.552855 Hz  
 AQ 0.9043968 sec  
 RG 199.43  
 DW 13.800 usec  
 DE 18.00 usec  
 TE 298.0 K  
 CNST2 145.0000000  
 CNST11 1.0000000  
 D1 2.00000000 sec  
 D20 0.00689655 sec  
 TDO 1  
 SFO1 150.9178988 MHz  
 NUC1 13C  
 P1 12.00 usec  
 P2 24.00 usec  
 PLW1 88.22599792 W  
 SFO2 600.1324005 MHz  
 NUC2 1H  
 CPDPRG2 waltz16  
 PCPD2 80.00 usec  
 PLW2 6.76100016 W  
 PLW12 0.06699187 W  
 F2 - Processing parameters  
 SI 32768  
 SF 150.9027978 MHz  
 WDW EM  
 SSB 0  
 LB 1.00 Hz  
 GB 0  
 PC 1.40

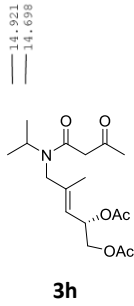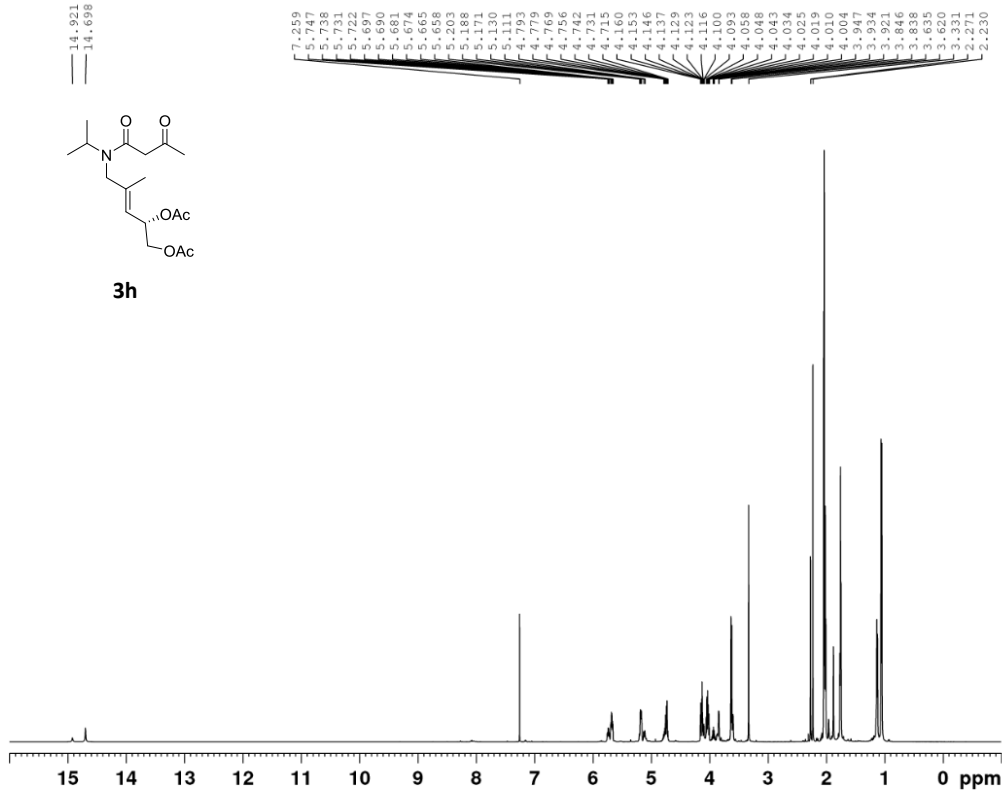

Current Data Parameters  
 NAME JBN359  
 EXPNO 7  
 PROCNO 1

F2 - Acquisition Parameters  
 Date\_ 20170801  
 Time 9.52  
 INSTRUM spect  
 PROBHD 5 mm CPTCI 1H-  
 PULPROG zg30  
 ID 65536  
 SOLVENT CDCl3  
 NS 16  
 DS 2  
 SWH 10000.000 Hz  
 FIDRES 0.152588 Hz  
 AQ 3.2767999 sec  
 RG 12.7  
 DW 50.000 usec  
 DE 10.00 usec  
 TE 298.2 K  
 D1 1.00000000 sec  
 TDO 1

===== CHANNEL f1 =====  
 SFO1 500.2730894 MHz  
 NUC1 1H  
 P1 7.63 usec  
 PLW1 9.50000000 W

F2 - Processing parameters  
 SI 65536  
 SF 500.2700080 MHz  
 WDW EM  
 SSB 0  
 LB 0.30 Hz  
 GB 0  
 PC 1.00

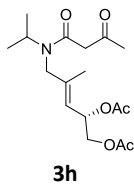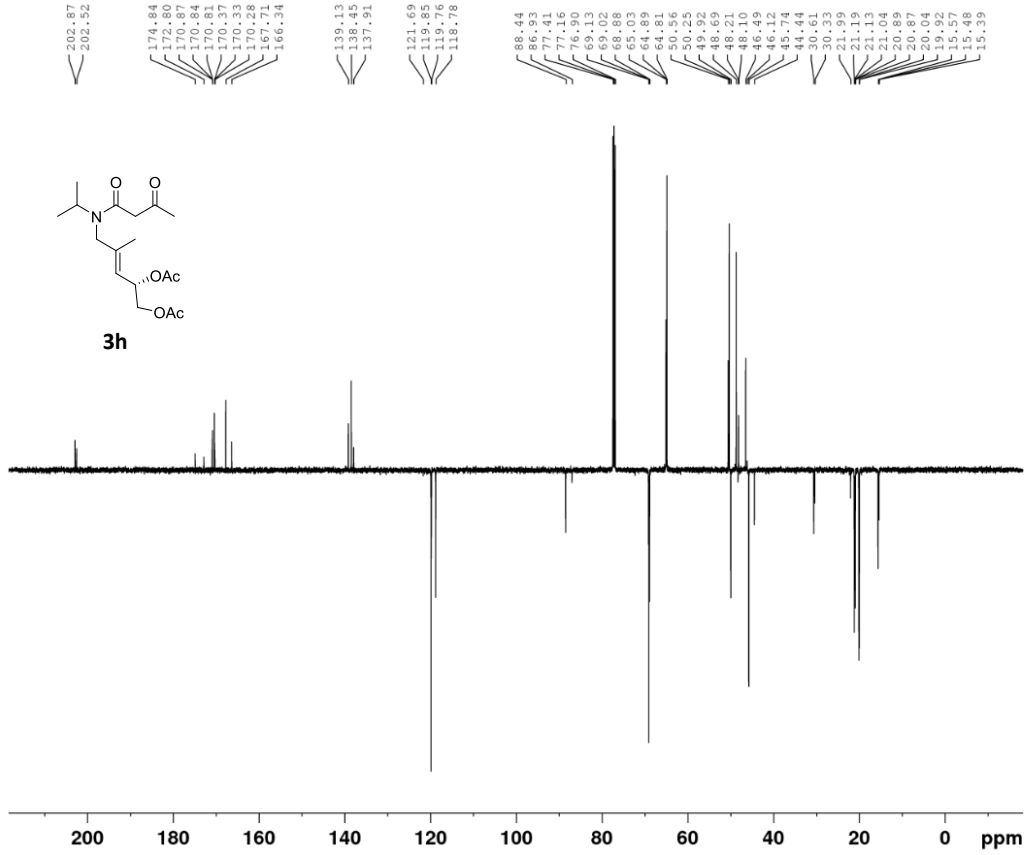

Current Data Parameters  
 NAME JBN359  
 EXPNO 9  
 PROCNO 1

F2 - Acquisition Parameters  
 Date\_ 20170801  
 Time 10.12  
 INSTRUM spect  
 PROBHD 5 mm CPTCI 1H-  
 PULPROG gmd  
 ID 65536  
 SOLVENT CDCl3  
 NS 256  
 DS 4  
 SWH 29761.904 Hz  
 FIDRES 0.454131 Hz  
 AQ 1.1010048 sec  
 RG 1030  
 DW 16.800 usec  
 DE 18.00 usec  
 TE 298.2 K  
 CNST2 145.0000000  
 CNST11 1.0000000  
 D1 2.00000000 sec  
 D10 0.00669655 sec  
 TDO 1

===== CHANNEL f1 =====  
 SFO1 125.8055709 MHz  
 NUC1 13C  
 P1 14.00 usec  
 F2 28.00 usec  
 PLW1 90.00000000 W

===== CHANNEL f2 =====  
 SFO2 500.2720011 MHz  
 NUC2 1H  
 CPDPRG[2] waltz16  
 PCPD2 80.00 usec  
 PLW2 9.50000000 W  
 PLW12 0.08641600 W

F2 - Processing parameters  
 SI 32768  
 SF 125.7929791 MHz  
 WDW EM  
 SSB 0  
 LB 1.00 Hz  
 GB 0  
 PC 1.40



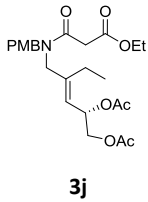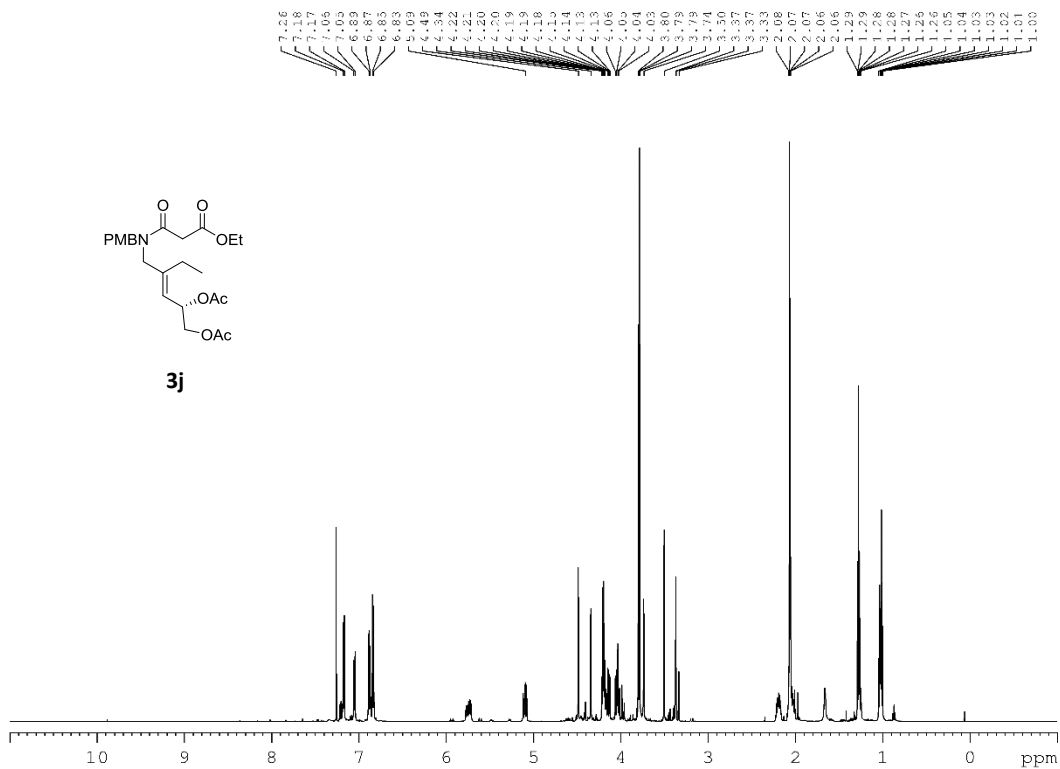

Current Data Parameters  
 NAME JN061b  
 LORNO  
 PROCNO 1  
 F2 Acquisition Parameters  
 Date\_ 20180920  
 Time 10.57 h  
 INSTRUM spect  
 FPROG0 2117768\_0047 ( )  
 FDIFFREQ 5030  
 F2 65536  
 SOLVENT CHCl3  
 NS 16  
 DS 2  
 SWH 12019.750 Hz  
 FIDRES 0.163559 Hz  
 AQ 2.7262976 sec  
 RG 1815  
 DA 41.600 usec  
 DF 78.00 usec  
 TE 298.2 K  
 DE 1.0000000 sec  
 LDC 1  
 ZF01 600.1307036 MHz  
 NUC1 1H  
 P1 8.00 usec  
 PLM1 6.7610016 W  
 F2 Processing parameters  
 AT 65536  
 SF 600.1307036 MHz  
 EQ 0  
 LE 0 0.30 Hz  
 GB 0  
 PC 1.00

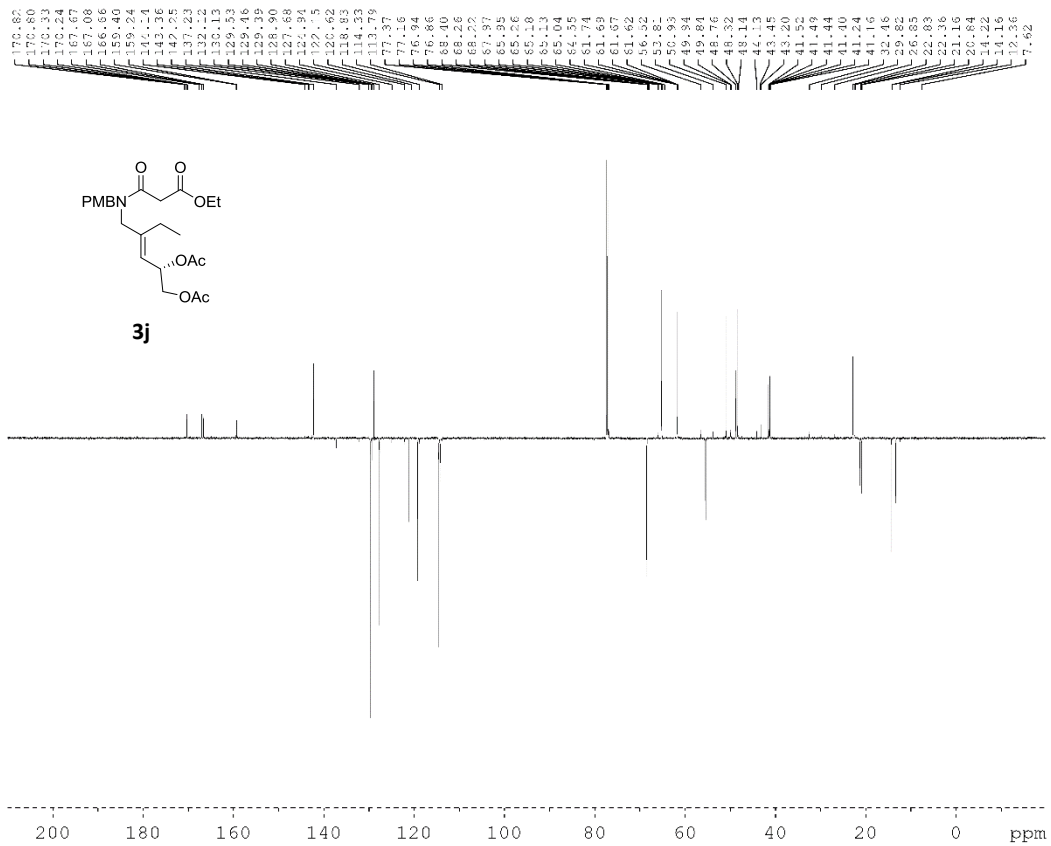

Current Data Parameters  
 NAME JN061b  
 LORNO  
 PROCNO 1  
 F2 Acquisition Parameters  
 Date\_ 20180920  
 Time 11.55 h  
 INSTRUM spect  
 FPROG0 2117768\_0047 ( )  
 F2 65536  
 SOLVENT CHCl3  
 NS 12  
 DS 4  
 SWH 32231.263 Hz  
 FIDRES 6.332355 Hz  
 AQ 6.9663968 sec  
 RG 39445  
 DA 13.800 usec  
 DE 18.00 usec  
 TE 298.2 K  
 ZF01 145.0000000 MHz  
 ZF02 1.0000000 MHz  
 D1 2.0000000 sec  
 D2 3.0000000 sec  
 TDS 1  
 ZUG1 150.9176886 MHz  
 NUC1 13C  
 P1 15.00 usec  
 P2 24.00 usec  
 PLM1 86.22339732 W  
 FPC0 600.1324000 MHz  
 FPC2  
 FPC3  
 FPC4  
 CPDPRG2 waltz16  
 PLM2 6.7610016 W  
 PLM3 9.6669917 W  
 F2 Processing parameters  
 AT 32768  
 SF 150.9074901 MHz  
 EQ 0  
 LE 0 1.00 Hz  
 GB 0  
 PC 1.40

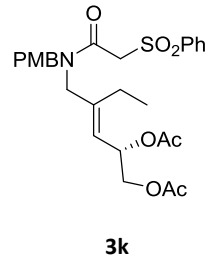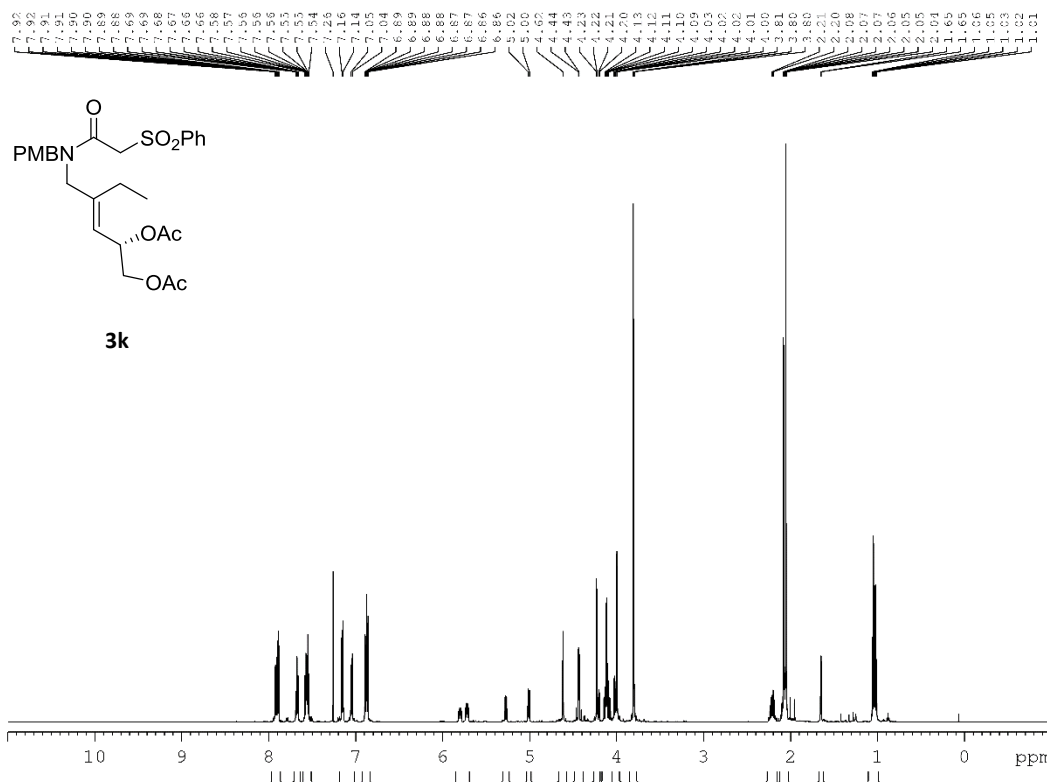

Current Data Parameters  
 NAME JMS61c  
 EXNO 1  
 PROCNO 1  
 F2 Acquisition Parameters  
 Date\_ 20180320  
 Time 16.38  
 INSTRUM spect  
 PROCNO 217768\_0067  
 F2PROG zgpg  
 CH 25358  
 SOLVENT CDCl3  
 NS 15  
 DS 4  
 SWH 12079.236 Kz  
 F1FREQ 0.182399 Kz  
 AQ 2.7262376 sec  
 TC 15.93  
 DR 41.500 usec  
 DF 18.00 usec  
 DE 290.4  
 D1 1.00000000 sec  
 TD 1  
 SFO1 600.133054 MHz  
 NUC1 1H  
 P1 8.00 usec  
 PLM1 8.7610016 W  
 Processing parameters  
 SI 32758  
 SF 600.1300147 MHz  
 MHZ EM  
 ASH 0  
 LB 0.50 Hz  
 GB 0  
 PC 1.00

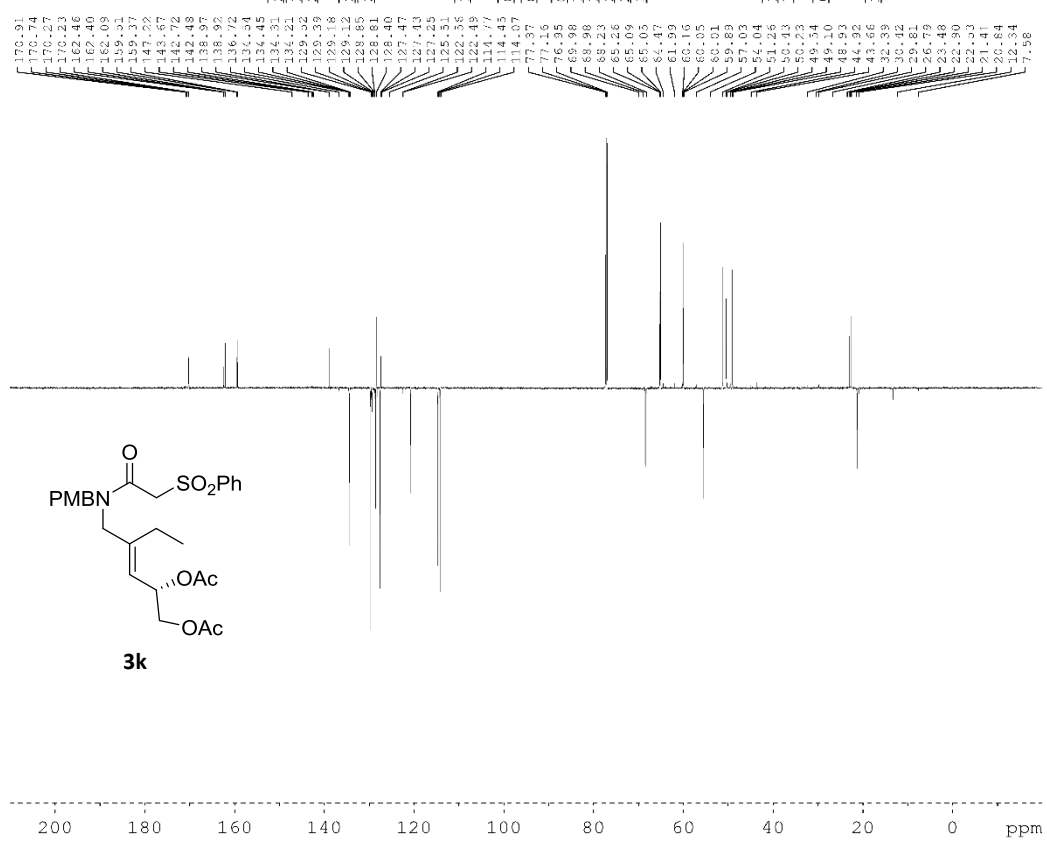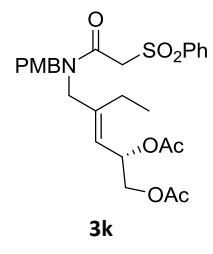

Current Data Parameters  
 NAME JMS61c  
 EXNO 2  
 PROCNO 1  
 F2 Acquisition Parameters  
 Date\_ 20180320  
 Time 16.34  
 INSTRUM spect  
 PROCNO 217768\_0067  
 F2PROG zgpg  
 CH 25358  
 SOLVENT CDCl3  
 NS 512  
 DS 4  
 SWH 36271.861 Kz  
 F1FREQ 0.352853 Kz  
 AQ 0.5943360 sec  
 TC 19.13  
 DR 13.800 usec  
 DF 10.00 usec  
 DE 258.4  
 D1 1.00000000 sec  
 TD 1  
 SFO1 150.9178988 MHz  
 NUC1 13C  
 P1 24.00 usec  
 PLM1 86.2239792 W  
 SFO2 600.1320000 MHz  
 NUC2 1H  
 CPDPRG2 null258  
 F2PROG 80.00 usec  
 F1FREQ 0.182399 Kz  
 PLM2 8.7610016 W  
 PLM2 0.06699187 W  
 Processing parameters  
 SI 32768  
 SF 150.9027320 MHz  
 MHZ EM  
 ASH 0  
 LB 1.00 Hz  
 GB 0  
 PC 1.00



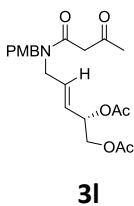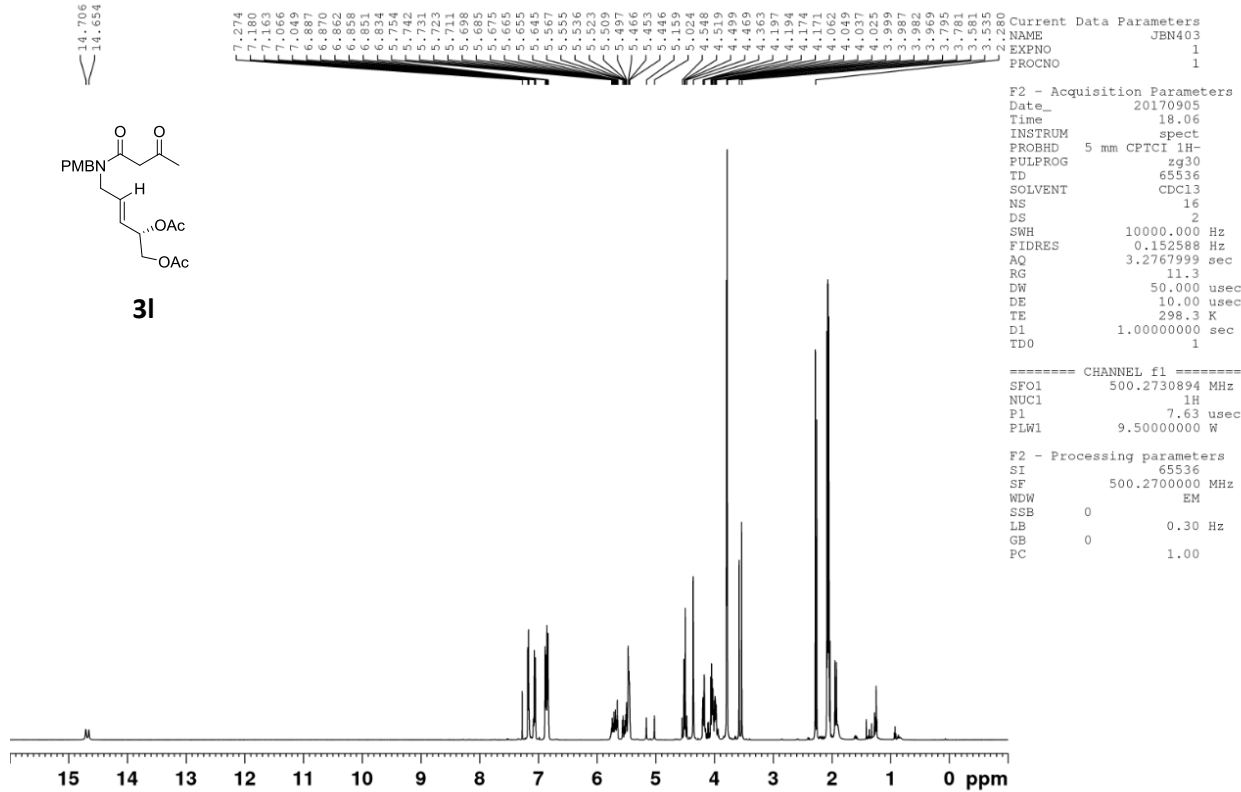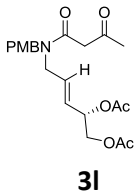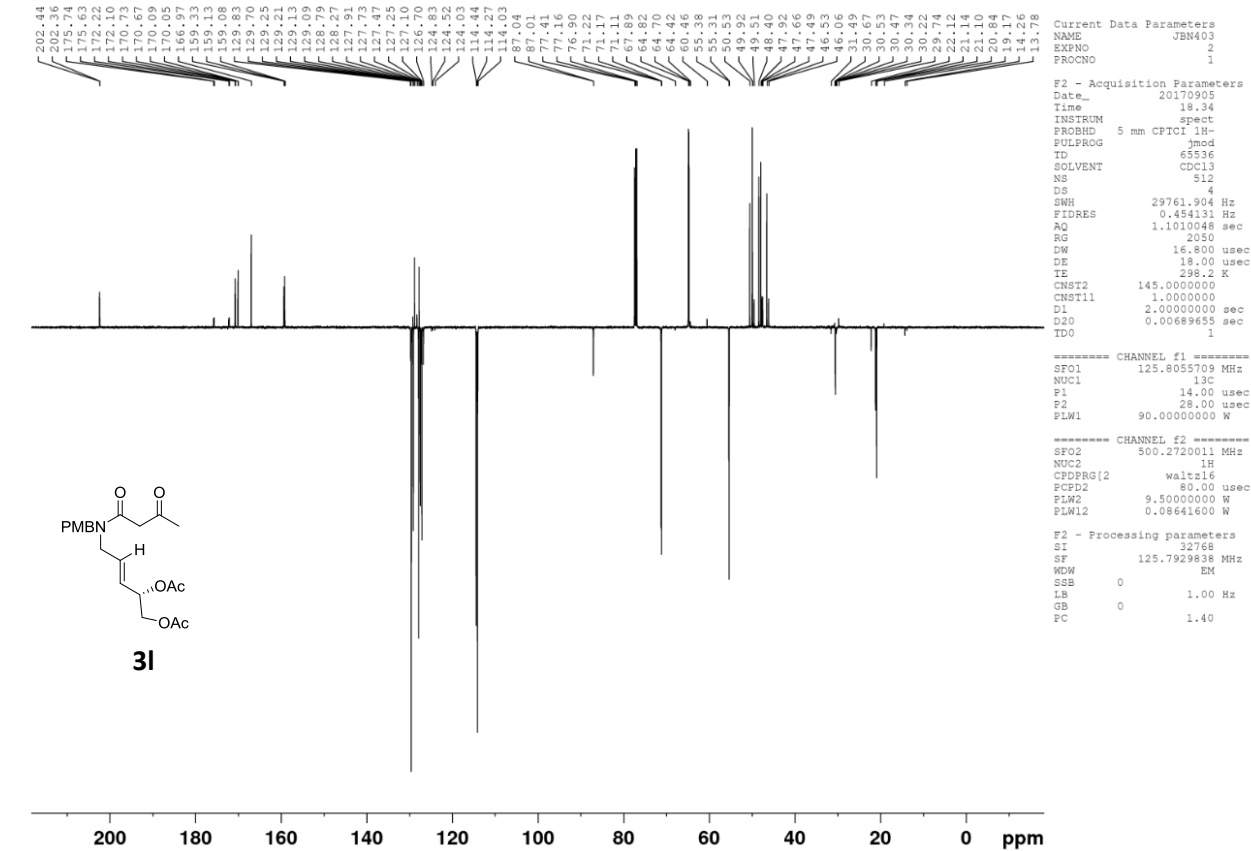

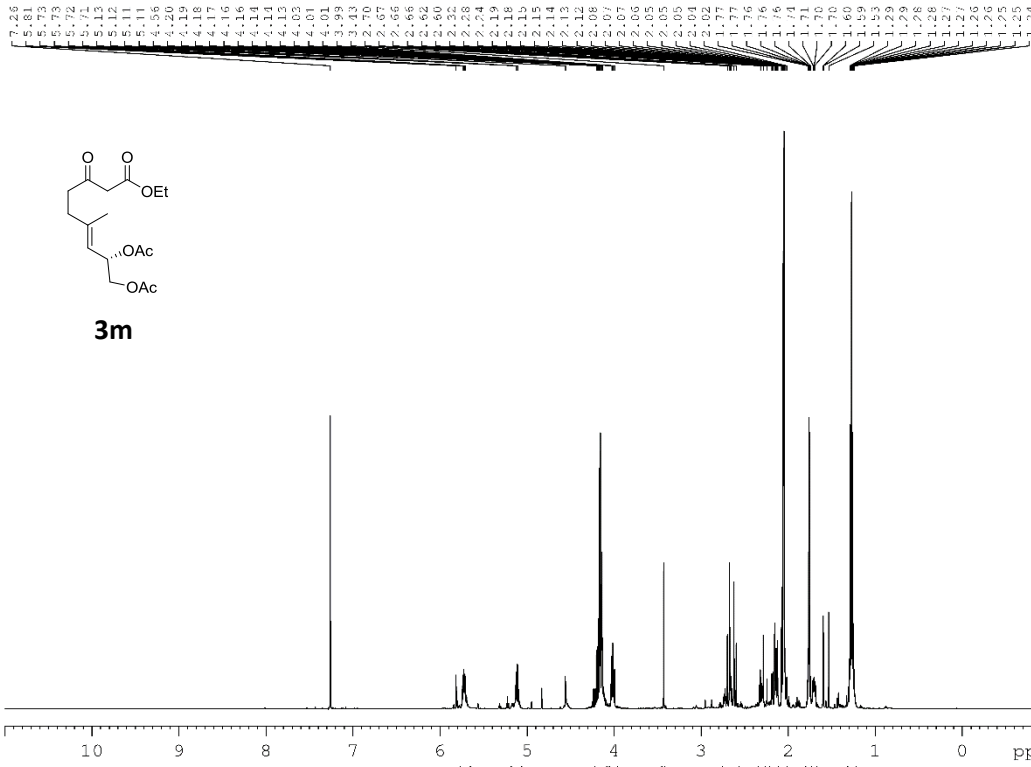

Current Data Parameters

NAME 20127

EXPNO 1

PROCNO 1

F2 Acquisition Parameters

Date\_ 20090926

Time 15.13 h

INSTRUM spect

PROBHD 511768\_0067 (

PULPROG zgpg

LS 0.000000

SOLVENT CDCl3

NS 2

DS 4

SWH 120.9.250 Hz

FIDRES 0.00399 Hz

RG 258.1 Hz

EQ 2.0262978 sec

RG 18.0

DS 1.60000000 sec

DE 18.00000000 sec

TE 298.1 K

D1 1.00000000 sec

TEC 1

NUC1 600.1337050 MHz

NUC2 1H

SI 3.00000000 sec

TM 6.36700000 M

F2 - Processing Parameters

SI 600.1337050 MHz

RF 600.1337050 MHz

PMW 3M

SSB 0

LB 0.30 Hz

GB 0

PC 1.00

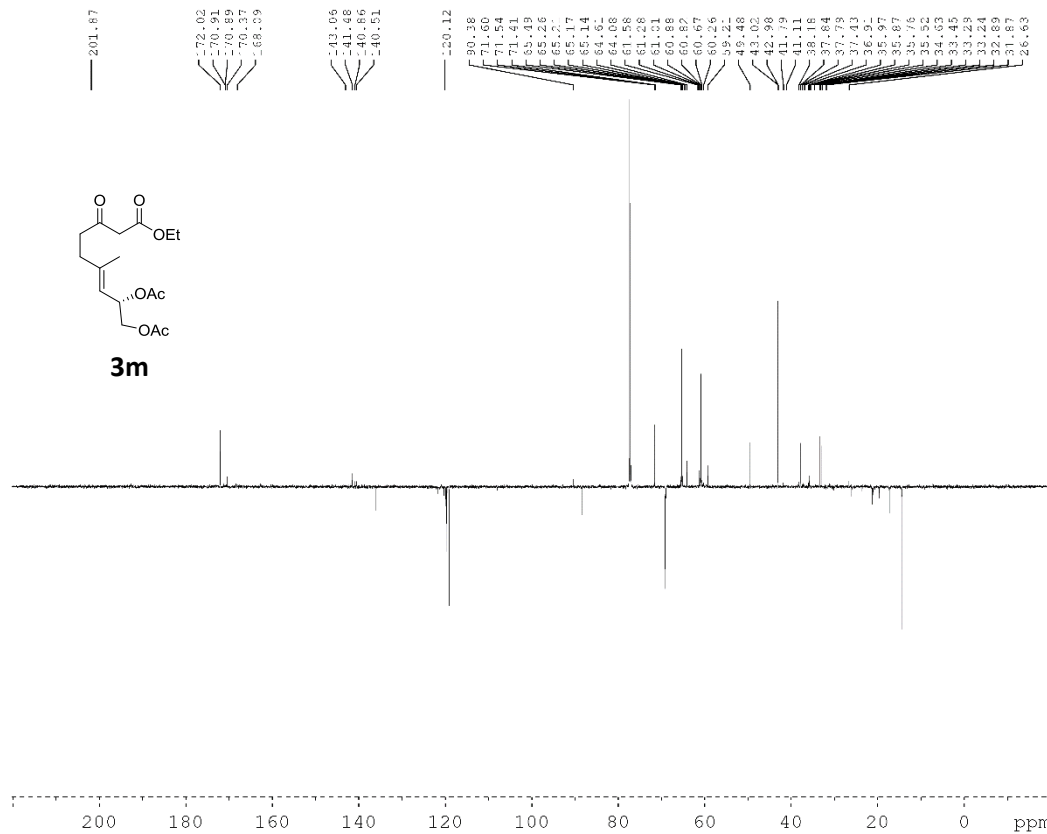

Current Data Parameters

NAME 20127

EXPNO 2

PROCNO 2

F2 Acquisition Parameters

Date\_ 20090926

Time 15.45 h

INSTRUM spect

PROBHD 511768\_0067 (

PULPROG zgpg

LS 0.000000

SOLVENT CDCl3

NS 4

DS 4

SWH 16251.683 Hz

FIDRES 0.002638 Hz

RG 3.5393968 sec

RG 199.43

EQ 19.85000000 sec

TE 298.1 K

D1 142.00000000 sec

TEC 1

NUC1 100.6261190 MHz

NUC2 13C

SI 2.00000000 sec

RF 100.6261190 MHz

PMW 130.9178988 MHz

SSB 0

LB 1.00000000 sec

GB 0

PC 1.00

F2 - Processing Parameters

SI 100.6261190 MHz

RF 100.6261190 MHz

PMW 13M

SSB 0

LB 1.00 Hz

GB 0

PC 1.00

14.775  
14.718  
7.260  
7.234  
7.230  
7.200  
7.191  
7.126  
7.112  
7.092  
7.078  
6.893  
6.857  
6.857  
6.843  
5.498  
5.491  
5.482  
5.479  
5.471  
5.443  
5.436  
5.427  
5.427  
5.302  
5.287  
5.169  
5.155  
4.713  
4.713  
4.418  
4.411  
4.393  
4.383  
4.356  
4.327  
4.275  
4.275  
4.078  
4.062  
4.056  
4.043  
4.036  
4.022  
4.022  
4.004  
4.004  
3.992  
3.917  
3.889  
3.799  
3.785  
3.652  
3.597  
3.597  
3.563  
3.557  
3.531  
3.290  
2.237  
2.035  
2.035  
2.014  
1.995  
1.972  
1.964  
1.913  
1.757  
1.670  
1.247

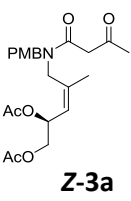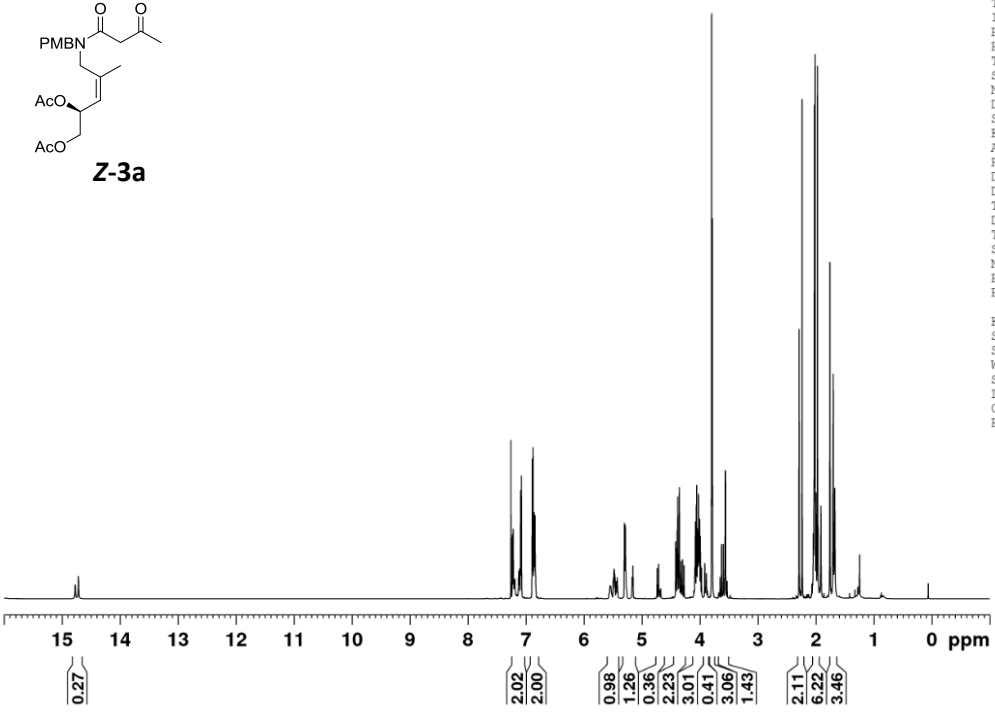

Current Data Parameters  
NAME JBN492  
EXPNO 1  
PROCNO 1

F2 - Acquisition Parameters  
Date\_ 20180326  
Time 9.44 h  
INSTRUM spect  
PROBHD Z117768\_0067 ( )  
PULPROG zg30  
TD 65536  
SOLVENT CDCl3  
NS 16  
DS 2  
SWH 12019.230 Hz  
FIDRES 0.183399 Hz  
AQ 2.7262976 sec  
RG 14.39  
DW 41.600 usec  
DE 18.00 usec  
TE 298.0 K  
D1 1.00000000 sec  
TDO 1  
SFO1 600.1337058 MHz  
NUC1 1H  
P1 8.00 usec  
PLW1 6.76100016 W

F2 - Processing parameters  
SI 65536  
SF 600.1300153 MHz  
WDW EM  
SSB 0  
LB 0.30 Hz  
GB 0  
PC 1.00

202.62  
202.46  
175.89  
175.74  
172.81  
172.66  
170.65  
170.21  
170.16  
170.11  
167.65  
167.62  
159.34  
159.34  
139.18  
139.12  
138.97  
138.10  
129.62  
129.52  
129.52  
128.59  
128.72  
128.37  
127.94  
127.88  
127.72  
123.94  
123.53  
122.83  
114.35  
114.20  
114.17  
113.82  
87.05  
87.05  
77.16  
77.37  
76.94  
68.39  
68.11  
68.04  
68.04  
65.00  
64.91  
55.43  
55.37  
50.17  
50.05  
49.32  
49.32  
48.45  
47.98  
47.88  
47.08  
45.41  
44.59  
39.81  
22.20  
22.10  
21.48  
21.41  
21.16  
21.14  
21.08  
20.99  
20.81  
20.81

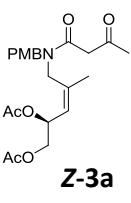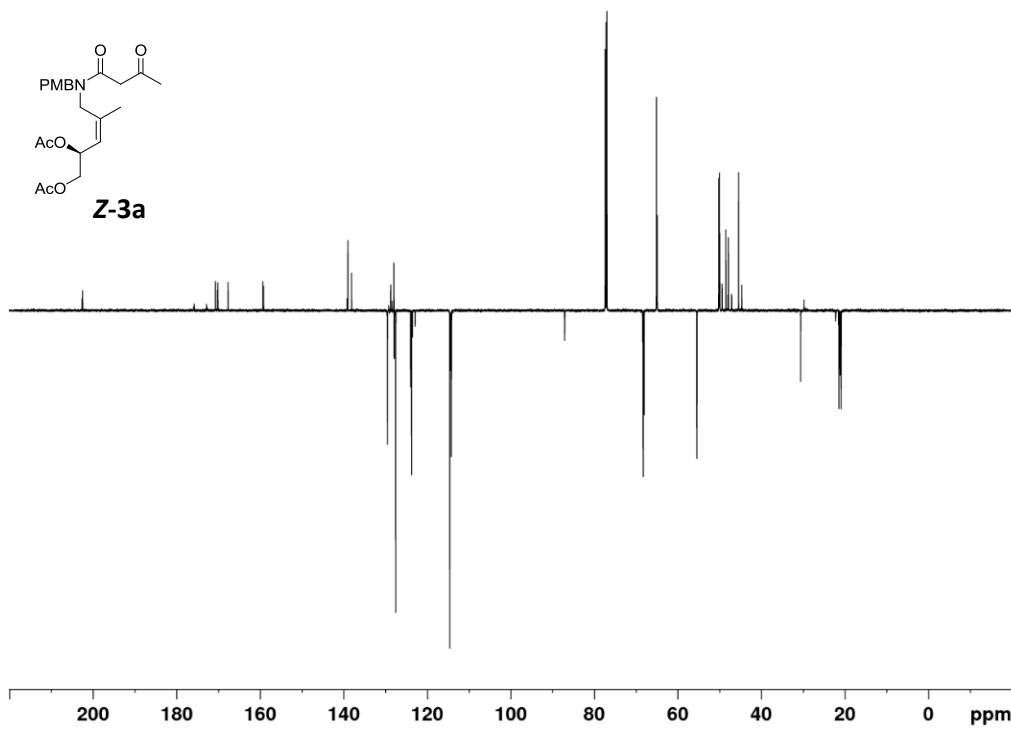

Current Data Parameters  
NAME JBN492  
EXPNO 1  
PROCNO 1

F2 - Acquisition Parameters  
Date\_ 20180326  
Time 10.10 h  
INSTRUM spect  
PROBHD Z117768\_0067 ( )  
PULPROG jmod  
TD 65536  
SOLVENT CDCl3  
NS 512  
DS 4  
SWH 36231.883 Hz  
FIDRES 0.552855 Hz  
AQ 0.9043968 sec  
RG 159.43  
DW 13.800 usec  
DE 18.00 usec  
TE 298.0 K  
D1 145.0000000 sec  
CNST11 1.0000000  
D20 0.00689655 sec  
TDO 1  
SFO1 150.9178988 MHz  
NUC1 13C  
P1 12.00 usec  
P2 24.00 usec  
PLW1 88.22599792 W  
SFO2 600.1324005 MHz  
NUC2 1H  
CPDPRG[2] waltz16  
PCPD2 80.00 usec  
PLW2 6.76100016 W  
PLW12 0.06699187 W

F2 - Processing parameters  
SI 32768  
SF 150.9027917 MHz  
WDW EM  
SSB 0  
LB 1.00 Hz  
GB 0  
PC 1.40

# Vinylcyclopropanes

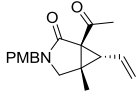

5a

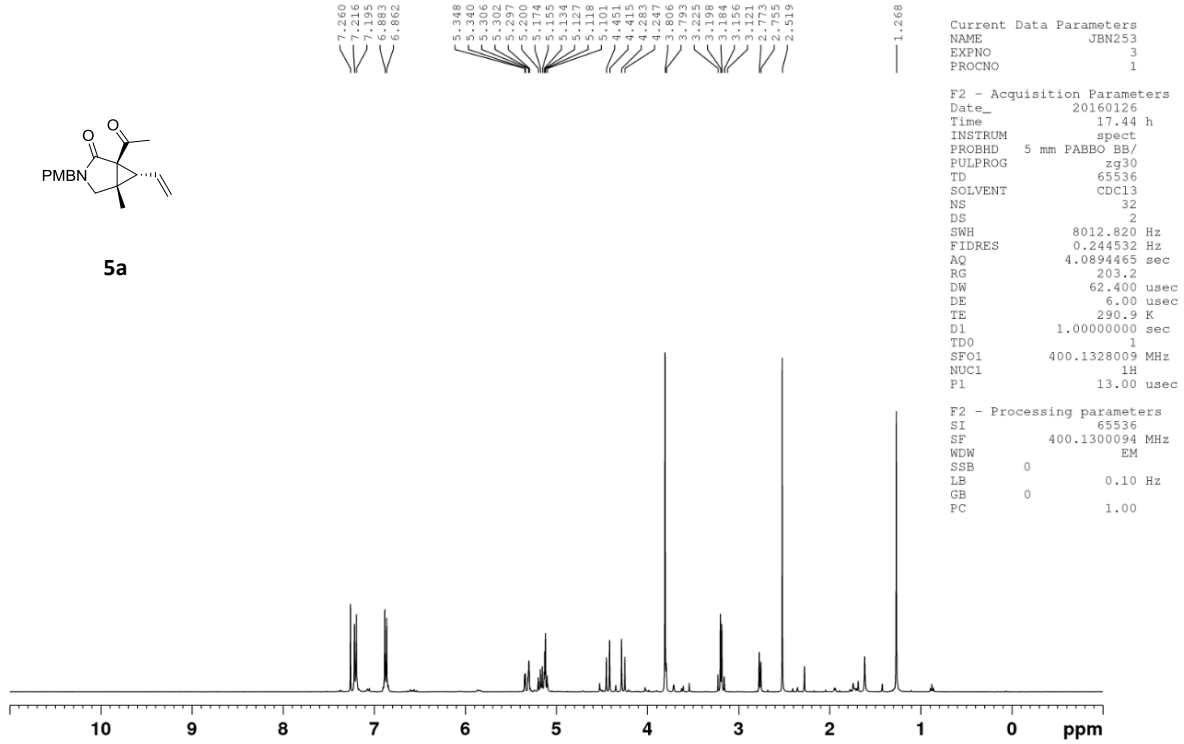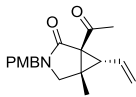

5a

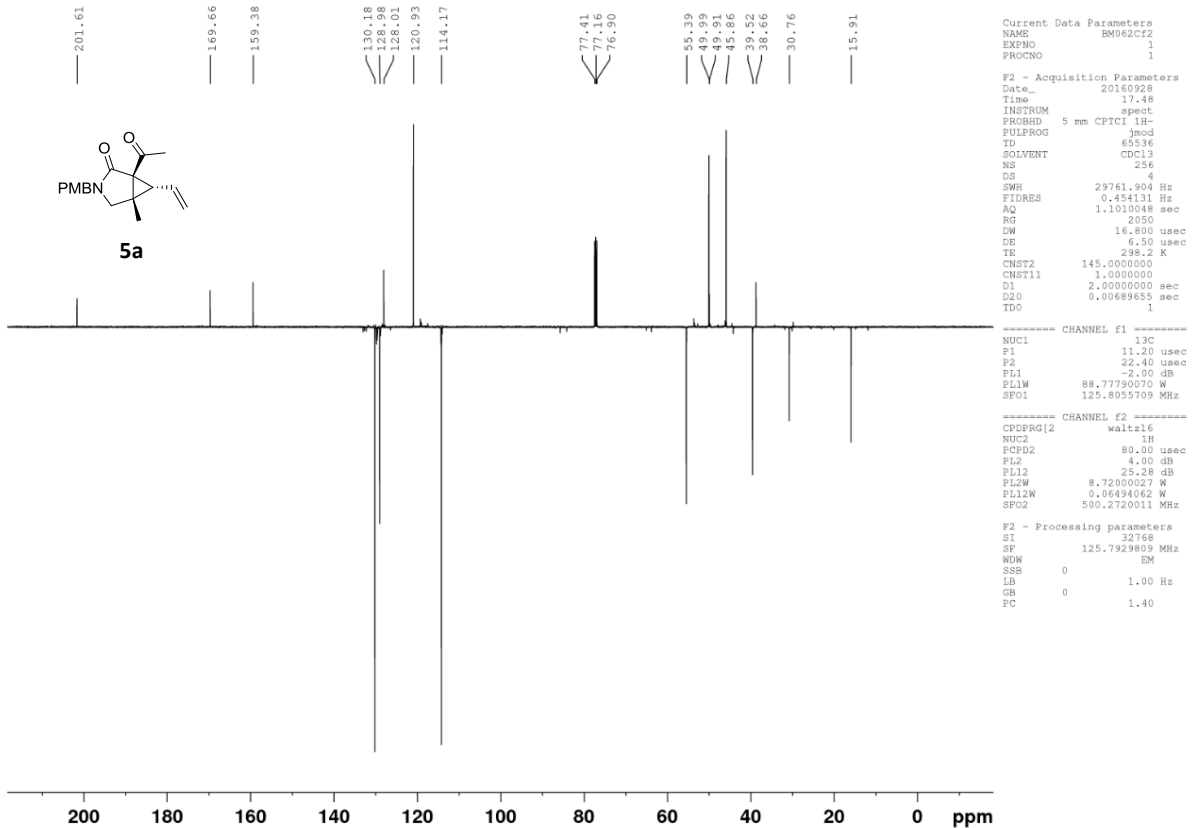

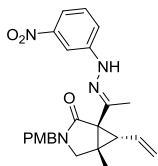

7

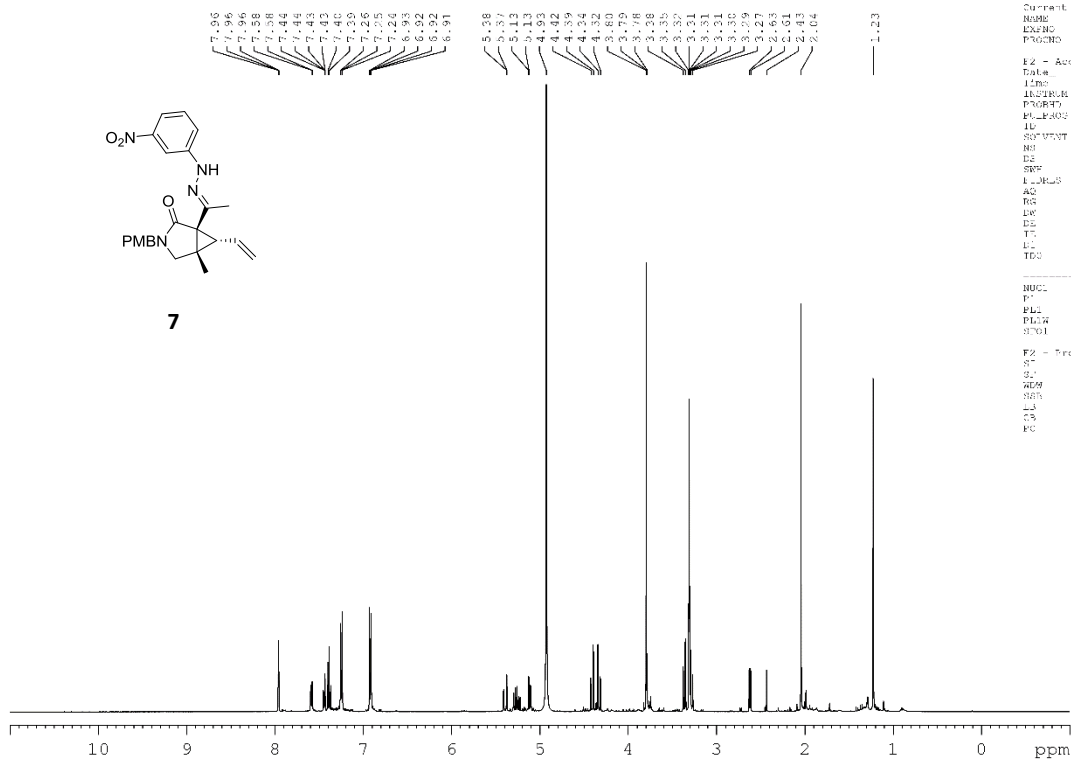

Current Data Parameters  
 NAME: JMN256  
 EXPNO: 1  
 PROCNO: 1

F2 - Acquisition Parameters  
 Date\_: 20160323  
 Time: 9.44  
 INSTRUM: spect  
 PROBRG: 5 mv CPIC  
 PULPROG: zgpg30  
 ID: 85258  
 SOLVENT: MeCl  
 NS: 52  
 DS: 2  
 SFO: 100.626136 MHz  
 LORRES: 0.157632 Hz  
 AQ: 0.178428 sec  
 RG: 17.2  
 DW: 48.400 usec  
 DE: 8.50 usec  
 TE: 300.2 K  
 F1: 1,000,000.00 sec  
 TDC: 1

===== CHANNEL f1 =====  
 NUC1: 13C  
 P1: 8.00 usec  
 PL1: 0.00 dB  
 PL12: 8.7200027 dB  
 SFO1: 500.1378001 MHz  
 F2 - Processing parameters  
 S: 32768  
 SD: 500.1270000 MHz  
 WDW: EM  
 SSB: 0  
 LB: 0.50 Hz  
 GB: 0  
 PC: 1.00

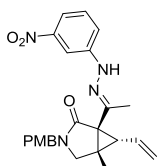

7

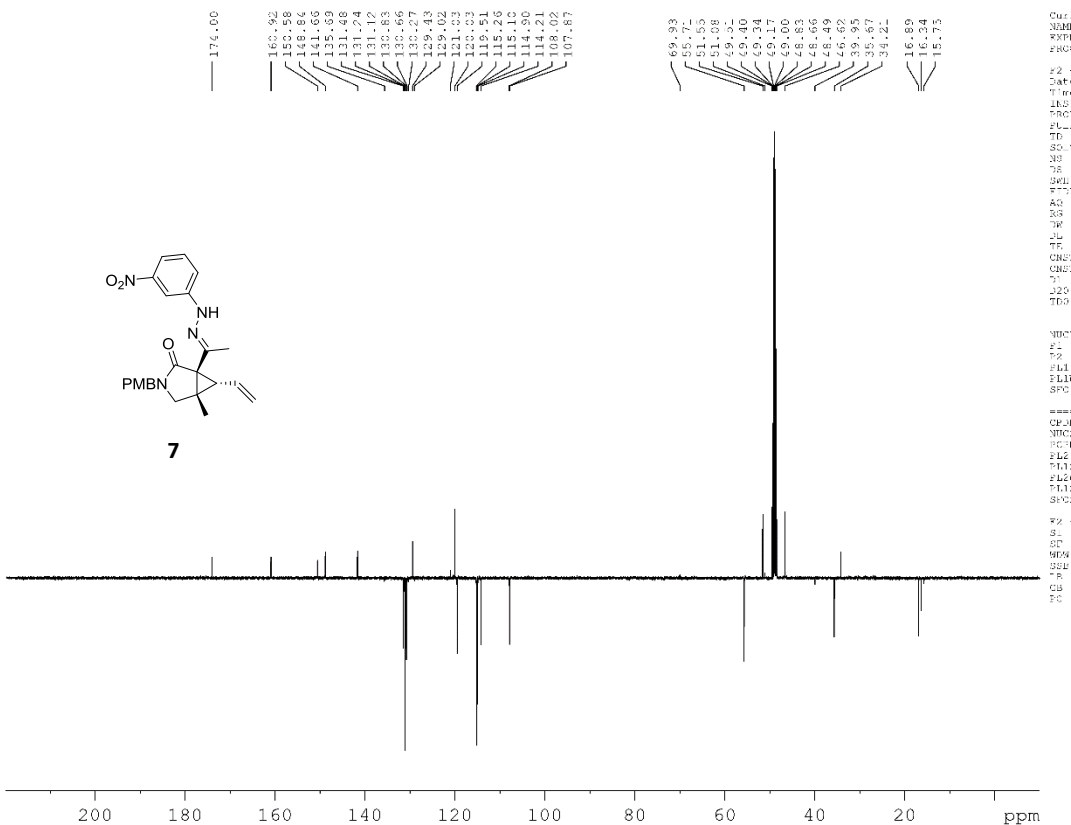

Current Data Parameters  
 NAME: JMN256  
 EXPNO: 1  
 PROCNO: 1

F2 - Acquisition Parameters  
 Date\_: 20160323  
 Time: 10.74  
 INSTRUM: spect  
 PROBRG: 5 mv CPIC  
 PULPROG: zgpg30  
 ID: 85258  
 SOLVENT: MeCl  
 NS: 512  
 DS: 4  
 SFO: 257.61904 MHz  
 LORRES: 0.157131 Hz  
 AQ: 0.1010048 sec  
 RG: 20.0  
 DW: 16.800 usec  
 DE: 8.50 usec  
 TE: 300.2 K  
 F1: 145,000,000.00 sec  
 TDC: 1  
 F1: 2,800,000.00 sec  
 T20: 0.00559655 sec  
 TEO: 1

===== CHANNEL f1 =====  
 NUC1: 13C  
 P1: 11.00 usec  
 PL1: 22.70 dB  
 PL12: 2.00 dB  
 PL13: 38.73790000 dB  
 SFO1: 100.626136 MHz

===== CHANNEL f2 =====  
 CHANP12: waltz16  
 NUC2: 13C  
 P2: 80.00 usec  
 PL2: 0.00 dB  
 PL12: 21.28 dB  
 PL13: 8.7200027 dB  
 SFO2: 0.0059052 MHz  
 SFO3: 500.1270001 MHz

F2 - Processing parameters  
 S: 32768  
 SD: 125.7328100 MHz  
 WDW: EM  
 SSB: 0  
 LB: 1.00 Hz  
 GB: 0  
 PC: 1.00

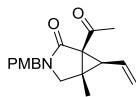

5a'

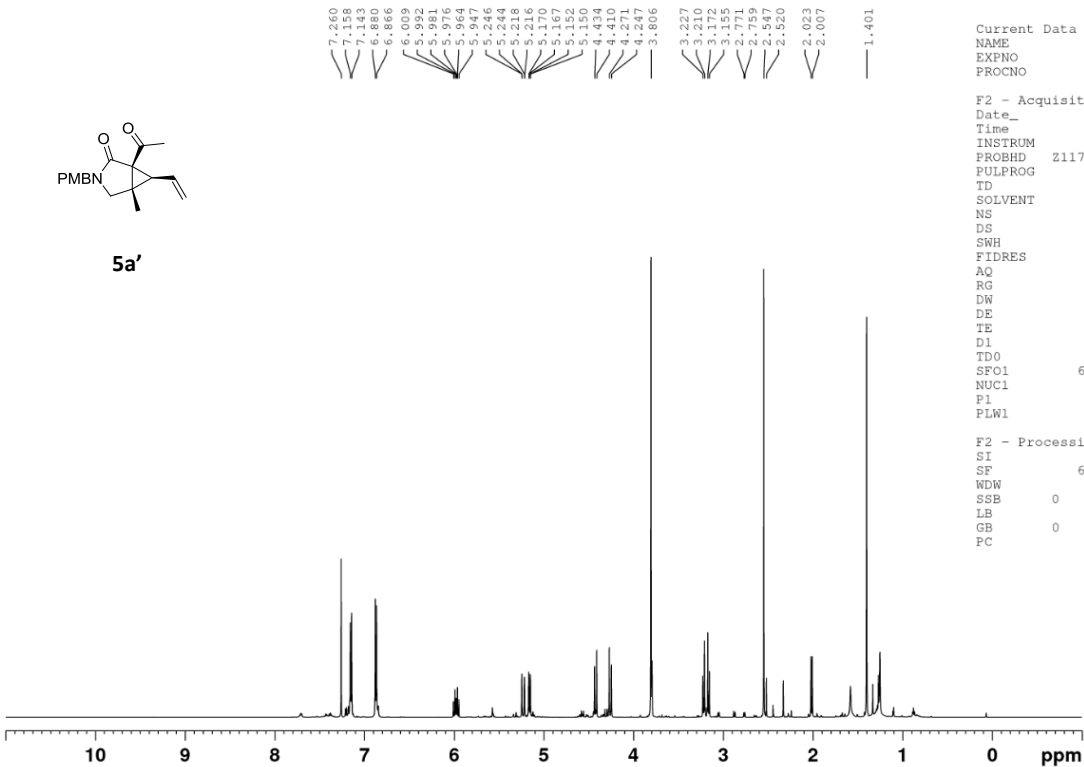

```

Current Data Parameters
NAME          JBN506
EXPNO         1
PROCNO        1

F2 - Acquisition Parameters
Date_         20180503
Time          12.58 h
INSTRUM       spect
PROBHD        Z117768_0067 (
PULPROG       zg30
TD            65536
SOLVENT       CDC13
NS            16
DS            2
SWH           12019.230 Hz
FIDRES        0.183399 Hz
AQ            2.7262976 sec
RG            19.7
DN            41.600 usec
DE            18.00 usec
TE            298.0 K
D1            1.00000000 sec
TD0           1
SFO1          600.1337058 MHz
NUC1          1H
P1            8.00 usec
PLW1          6.76100016 W

F2 - Processing parameters
SI            65536
SF            600.1300155 MHz
WDW           EM
SSB           0
LB            0.30 Hz
GB            0
PC            1.00
  
```

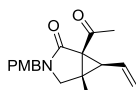

5a'

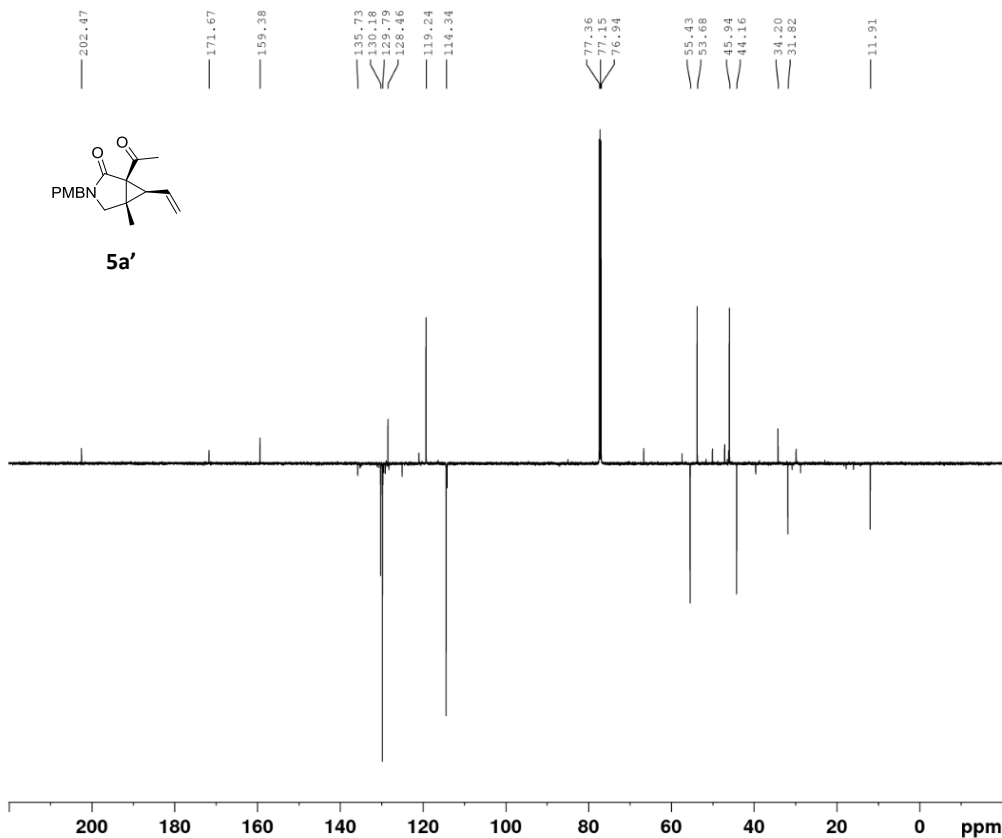

```

Current Data Parameters
NAME          JBN506
EXPNO         2
PROCNO        1

F2 - Acquisition Parameters
Date_         20180503
Time          13.24 h
INSTRUM       spect
PROBHD        Z117768_0067 (
PULPROG       jmod
TD            65536
SOLVENT       CDC13
NS            512
DS            4
SWH           36231.883 Hz
FIDRES        0.552855 Hz
AQ            0.9043968 sec
RG            199.43
DN            13.800 usec
DE            18.00 usec
TE            298.0 K
CNST2         145.0000000
CNST11        1.0000000
D1            2.00000000 sec
D20           0.00689655 sec
TD0           1
SFO1          150.9178988 MHz
NUC1          13C
P1            12.00 usec
P2            24.00 usec
PLW1          88.2259972 W
SFO2          600.1324005 MHz
NUC2          1H
CPDPRG[2]    waltz16
PCPD2         80.00 usec
PLW2          6.76100016 W
PLW12         0.06699187 W

F2 - Processing parameters
SI            32768
SF            150.9027898 MHz
WDW           EM
SSB           0
LB            1.00 Hz
GB            0
PC            1.40
  
```

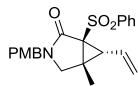

5b

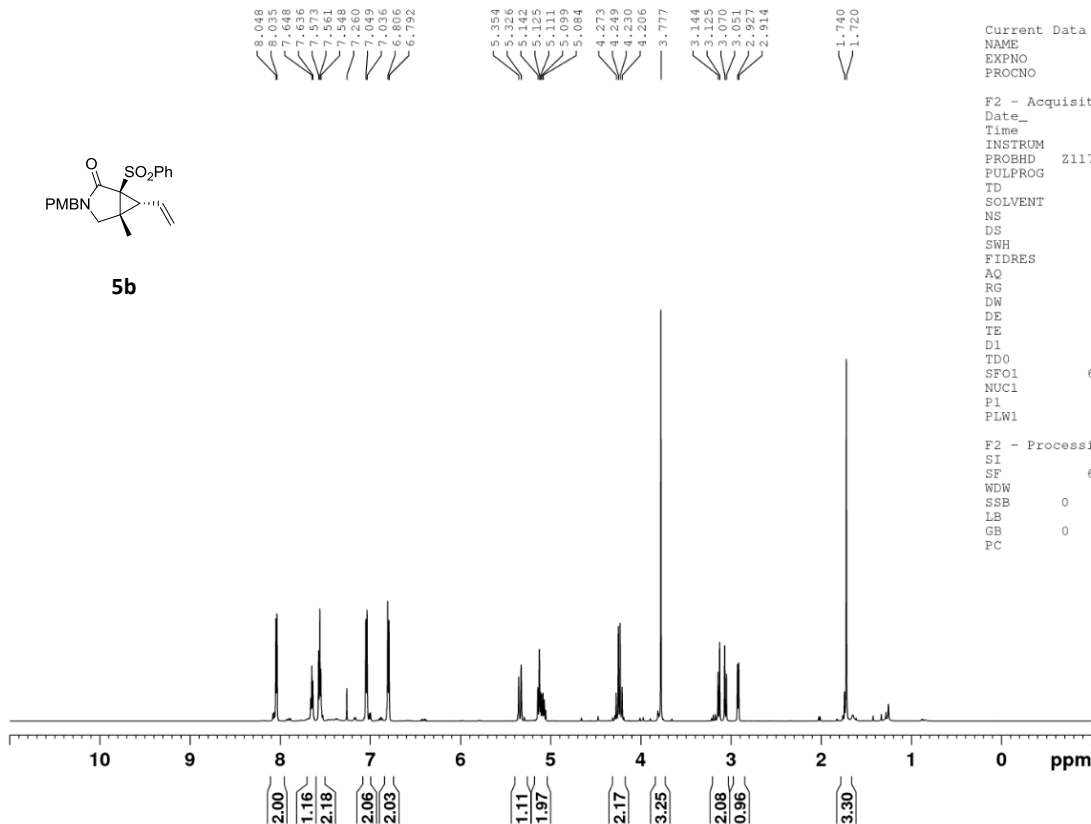

```

Current Data Parameters
NAME          JBN410
EXPNO        1
PROCNO       1

F2 - Acquisition Parameters
Date_        20180223
Time         15.39 h
INSTRUM      spect
PROBHD       Z117768_0067 (
PULPROG      zg30
TD           65536
SOLVENT      CDCl3
NS           16
DS           2
SWH          12019.230 Hz
FIDRES       0.183399 Hz
AQ           2.7262976 sec
RG           14.39
DW           41.600 usec
DE           18.00 usec
TE           298.0 K
D1           1.00000000 sec
TD0          1
SFO1         600.1337058 MHz
NUC1         1H
P1           8.00 usec
PLW1         6.76100016 W

F2 - Processing parameters
SI           65536
SF           600.1300146 MHz
WDW          EM
SSB          0
LB           0.30 Hz
GB           0
PC           1.00
  
```

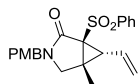

5b

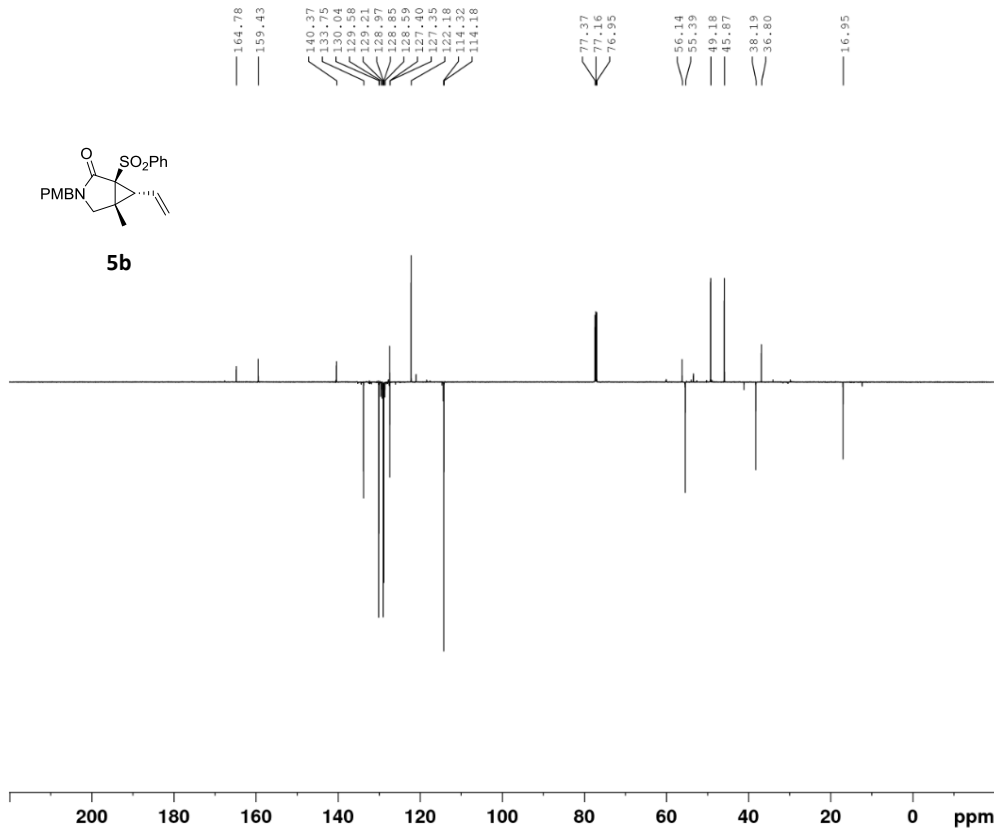

```

Current Data Parameters
NAME          JBN410
EXPNO        2
PROCNO       1

F2 - Acquisition Parameters
Date_        20180223
Time         16.05 h
INSTRUM      spect
PROBHD       Z117768_0067 (
PULPROG      jmod
TD           65536
SOLVENT      CDCl3
NS           512
DS           4
SWH          36231.883 Hz
FIDRES       0.552655 Hz
AQ           0.9043968 sec
RG           199.43
DW           13.800 usec
DE           18.00 usec
TE           298.0 K
CNST2       145.0000000
CNST11      1.0000000
D1           2.00000000 sec
D20         0.00689655 sec
TD0         1
SFO1        150.9178988 MHz
NUC1        13C
P1          12.00 usec
P2          24.00 usec
PLW1        88.22599792 W
SFO2        600.1324005 MHz
NUC2        1H
CPDPRG2     waltz16
PCPD2       80.00 usec
PLW2        6.76100016 W
PLW12       0.06699187 W

F2 - Processing parameters
SI           32768
SF           150.9027943 MHz
WDW          EM
SSB          0
LB           1.00 Hz
GB           0
PC           1.40
  
```

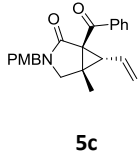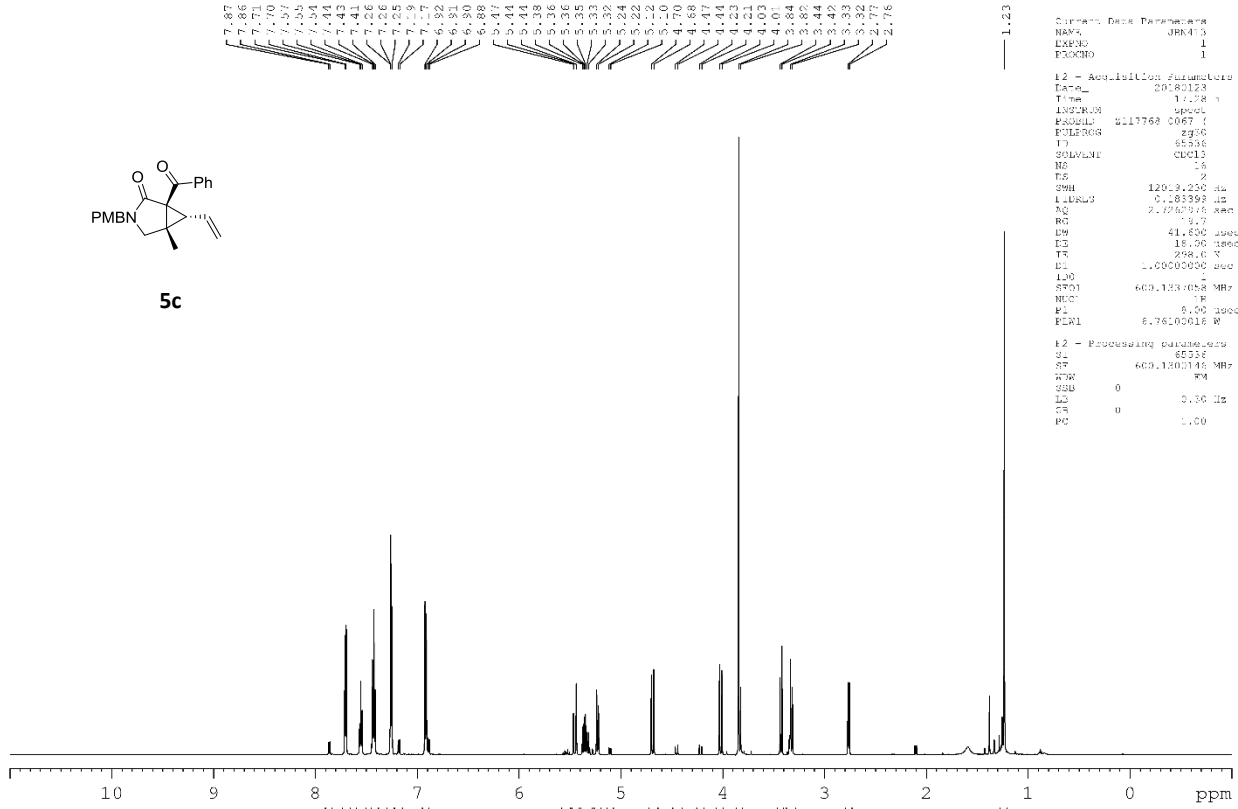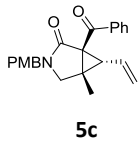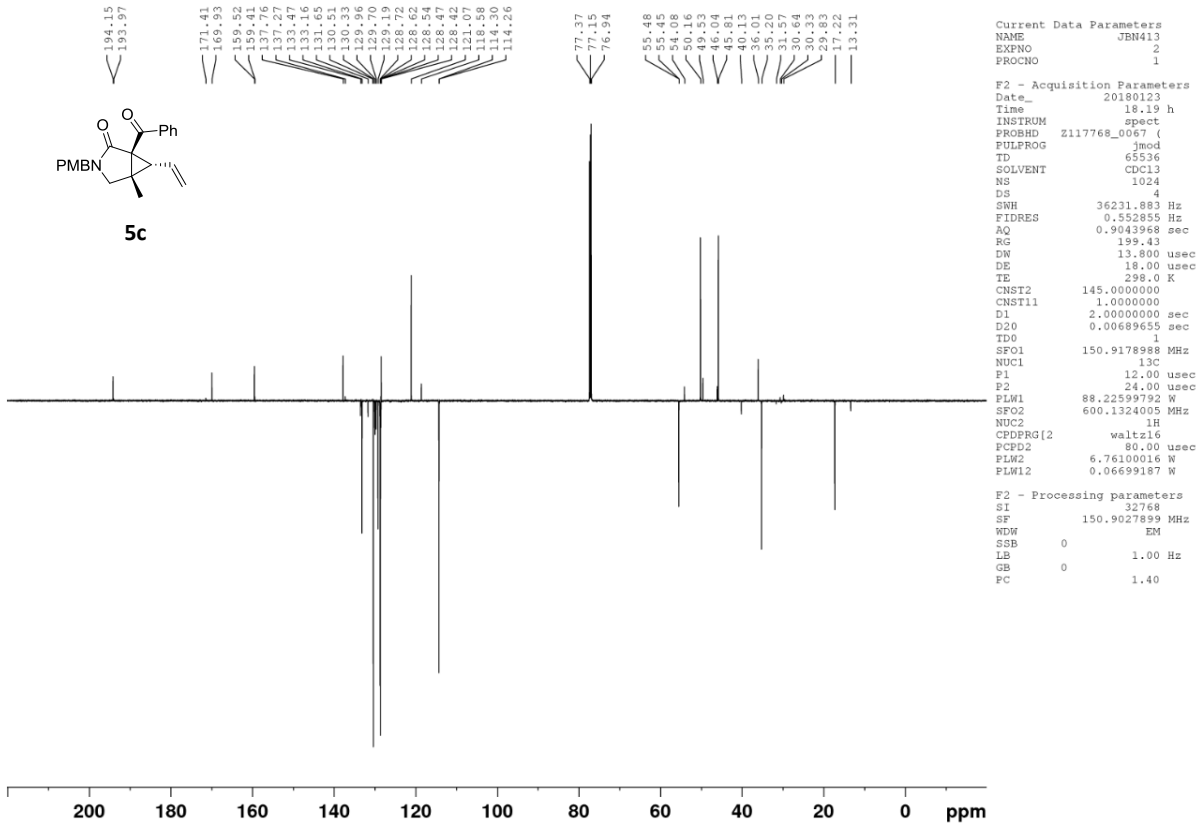





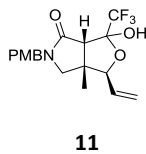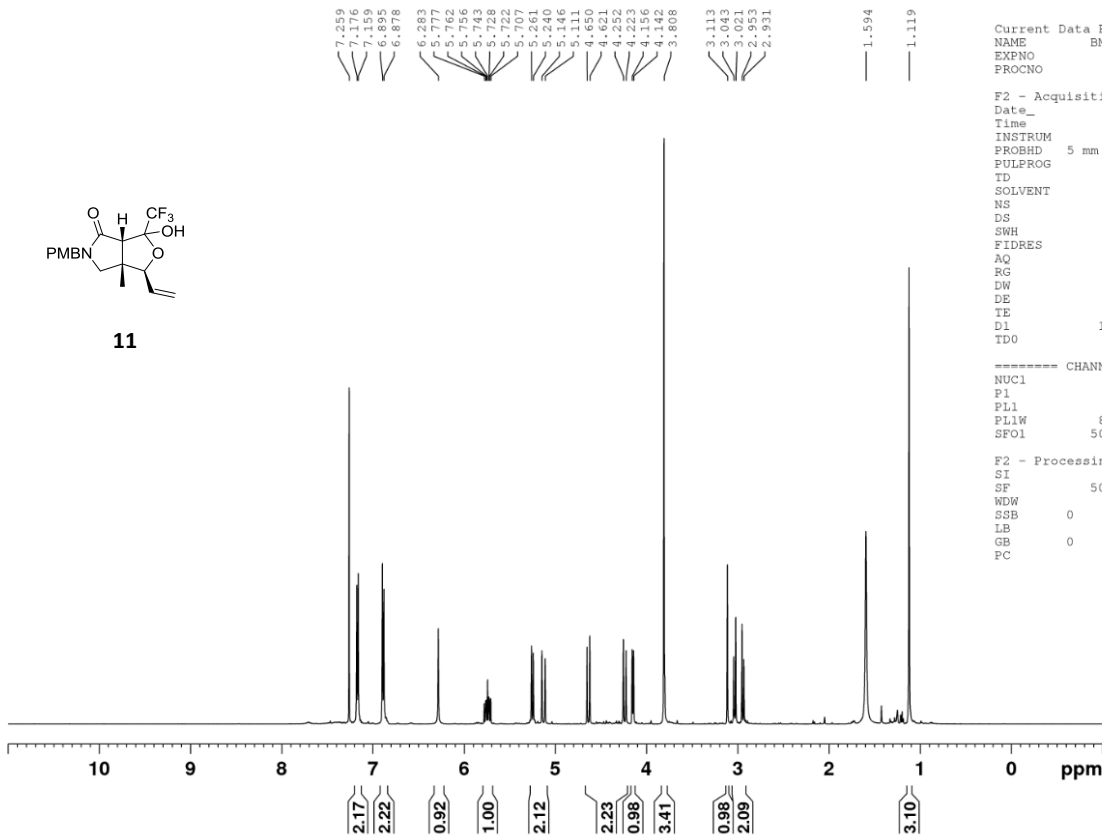

```

Current Data Parameters
NAME      BM0035-pure
EXPNO    1
PROCNO   1

F2 - Acquisition Parameters
Date_    20160812
Time     17.08
INSTRUM  spect
PROBHD   5 mm CPTCI 1H-
PULPROG  zg30
TD        65536
SOLVENT  CDCl3
NS        32
DS        2
SWH       10330.578 Hz
FIDRES    0.157632 Hz
AQ        3.1719425 sec
RG        12.7
DW        48.400 usec
DE        6.50 usec
TE        298.2 K
D1        1.00000000 sec
TD0       1

===== CHANNEL f1 =====
NUC1     1H
P1       6.70 usec
PL1      4.00 dB
PL1W     8.72000027 W
SFO1     500.2730894 MHz

F2 - Processing parameters
SI       32768
SF       500.2700076 MHz
WDW      EM
SSB      0
LB       0.30 Hz
GB       0
PC       1.00

```

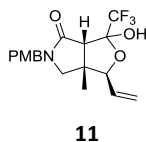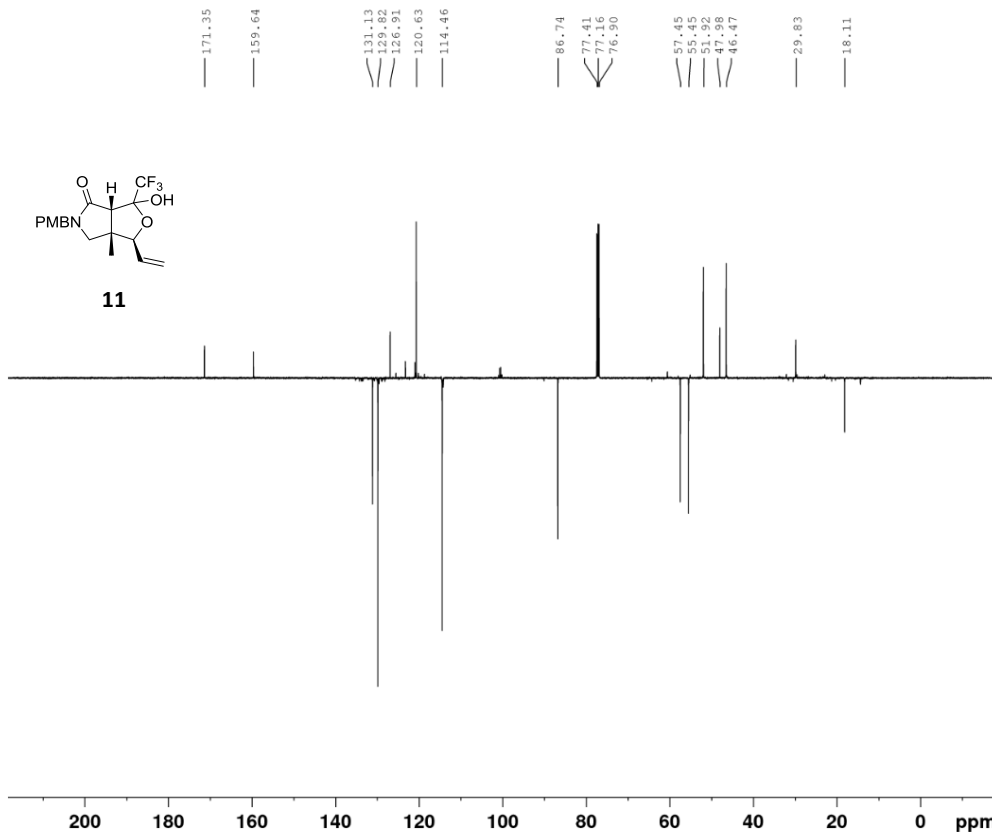

```

Current Data Parameters
NAME      BM0035-3C
EXPNO    1
PROCNO   1

F2 - Acquisition Parameters
Date_    20160812
Time     12.28
INSTRUM  spect
PROBHD   5 mm CPTCI 1H-
PULPROG  jmod
TD        65536
SOLVENT  CDCl3
NS        512
DS        4
SWH       29761.904 Hz
FIDRES    0.454131 Hz
AQ        1.1010048 sec
RG        2050
DW        16.800 usec
DE        6.50 usec
TE        298.2 K
CNST2    145.0000000
CNST11   1.0000000
D1        2.00000000 sec
D20      0.00689655 sec
TD0       1

===== CHANNEL f1 =====
NUC1     13C
P1       11.20 usec
PL1      22.40 dB
PL1W     88.77790070 W
SFO1     125.8055709 MHz

===== CHANNEL f2 =====
CPDPRG[2] waltz16
NUC2     1H
PCPD2    80.00 usec
PL2      4.00 dB
PL12     25.28 dB
PL2W     8.72000027 W
SFO2     500.2720011 MHz

F2 - Processing parameters
SI       32768
SF       125.7929781 MHz
WDW      EM
SSB      0
LB       1.00 Hz
GB       0
PC       1.40

```

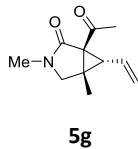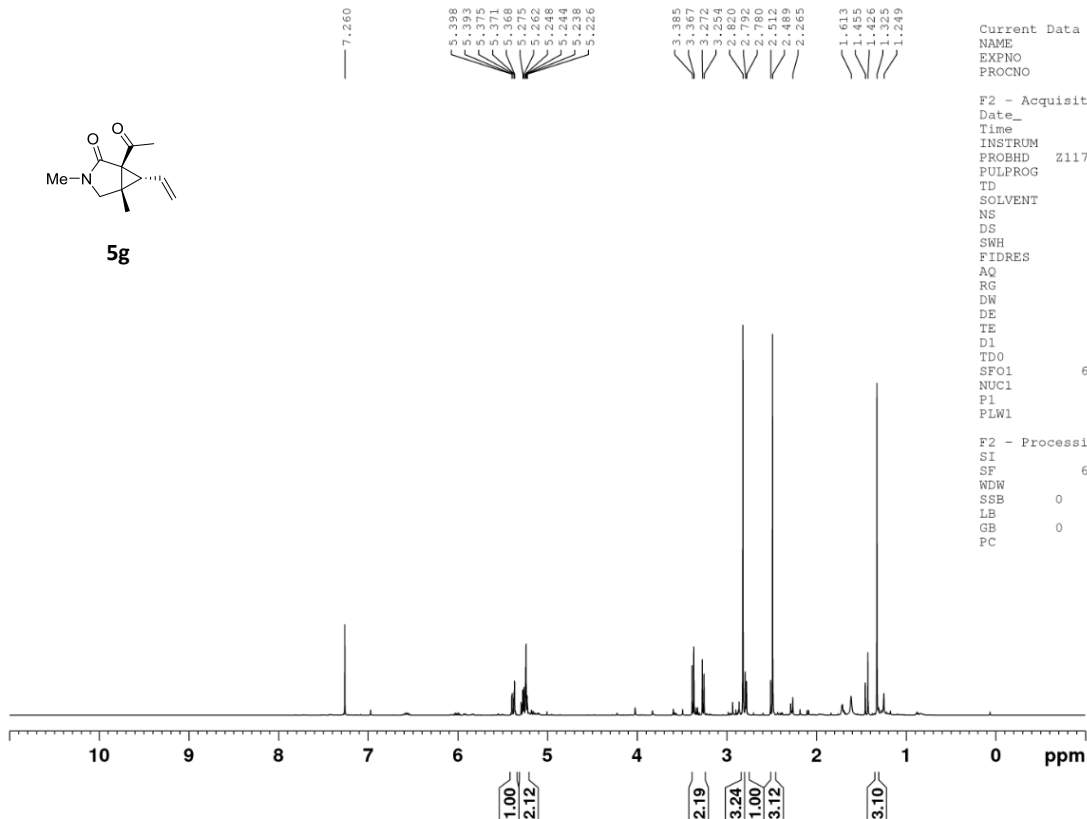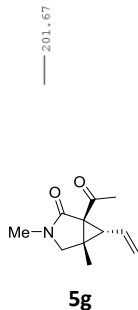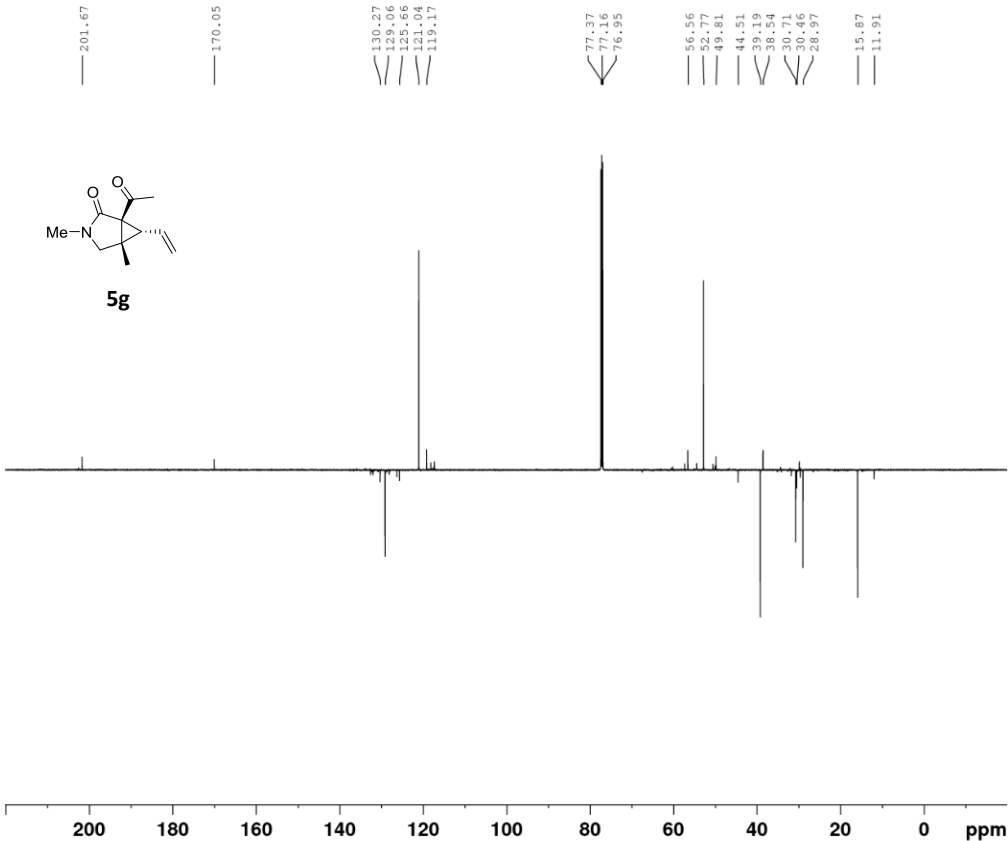

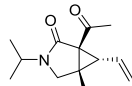

5h

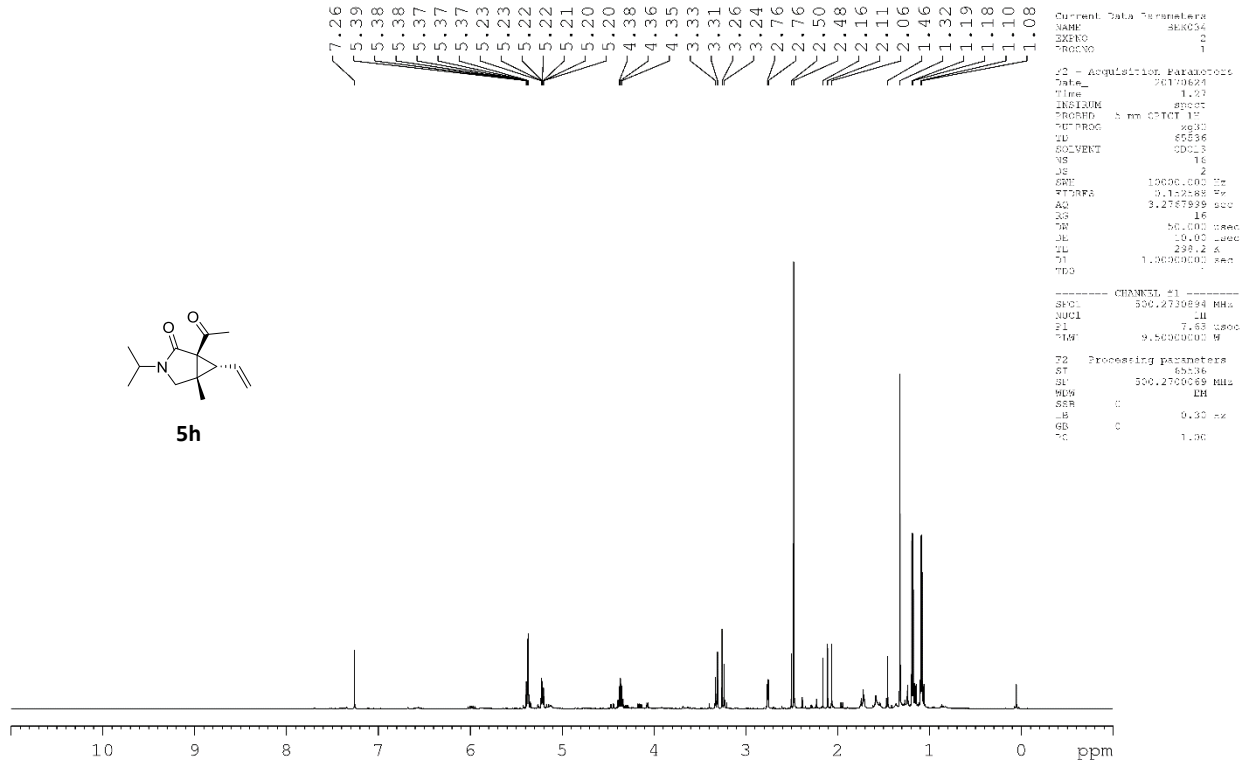

Current Data Parameters  
 NAME 5h054  
 EXPNO 1  
 PROCNO 1  
 F2 - Acquisition Parameters  
 Date\_ 20170823  
 Time 1.23  
 INSTRUM spect  
 PROBRP 4 rev 0707 15  
 TC PROC 8030  
 VE 85836  
 SOLVENT DMS-D  
 NS 16  
 DS 2  
 SFO 10000.000 Hz  
 FIDRES 0.112088 Hz  
 AQ 3.2787939 sec  
 AS 16  
 TM 50.000 sec  
 JL 10.00 usec  
 LL 230.2 A  
 F1 1.0000000 MHz  
 F2 Processing Parameters  
 ST 32768  
 BU 500.2700049 MHz  
 WU 8  
 SFR 0  
 GR 0  
 GC 0  
 TC 1.90

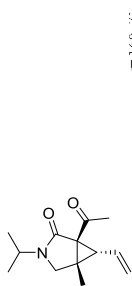

5h

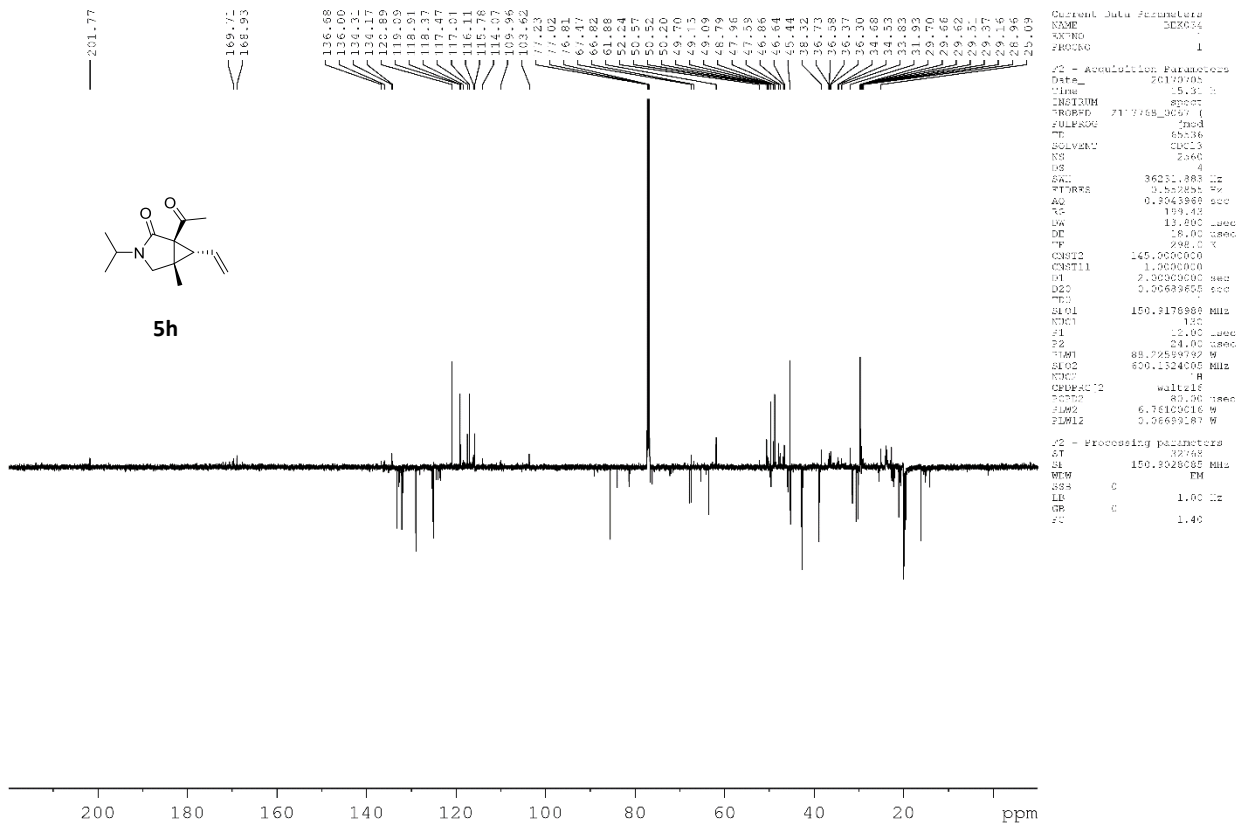

Current Data Parameters  
 NAME 5h054  
 EXPNO 1  
 PROCNO 1  
 F2 - Acquisition Parameters  
 Date\_ 20170823  
 Time 5.31  
 INSTRUM spect  
 PROBRP 717768\_0657 (1  
 SFORES 70000.000 Hz  
 TC 180.45  
 DS 4  
 SFO 10000.000 Hz  
 FIDRES 0.1043980 Hz  
 AQ 0.3043980 sec  
 AS 16  
 TM 13.000 sec  
 DC 18.00 usec  
 F1 100.6260000 MHz  
 F2 Processing Parameters  
 ST 32768  
 BU 150.2176980 MHz  
 WU 8  
 SFR 0  
 GR 0  
 GC 0  
 TC 1.40

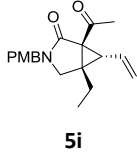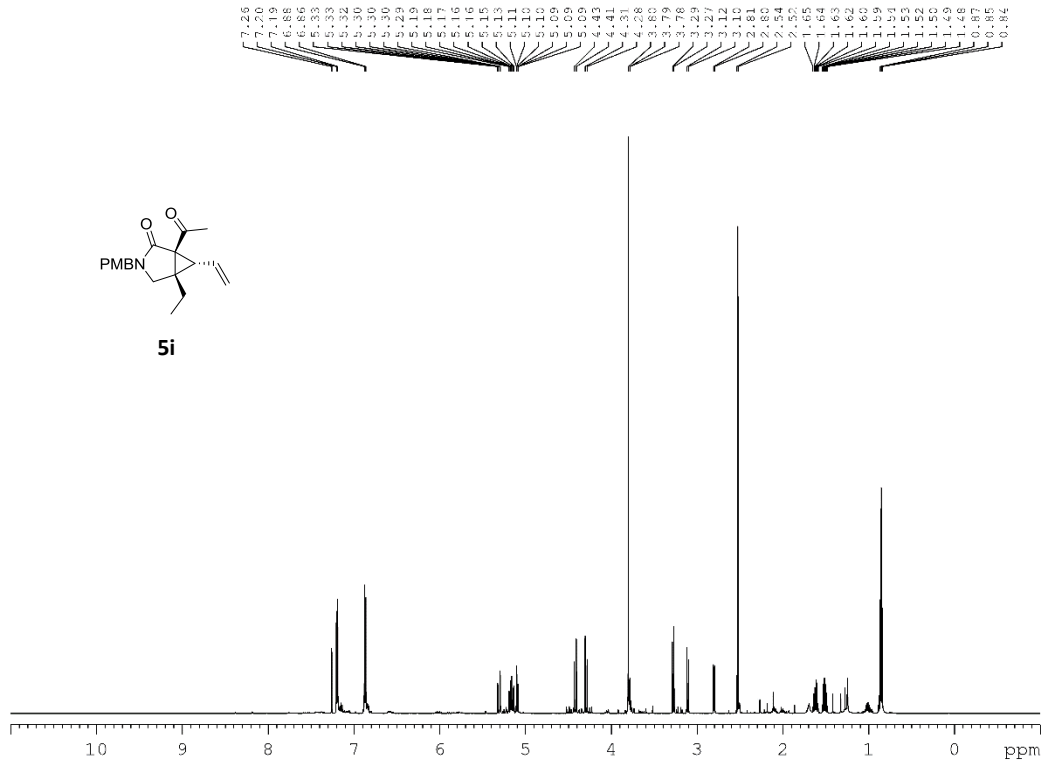

Client Data Parameters  
 NAME JMS624  
 XPRO 0  
 PROCNO 1

F2 - Acquisition Parameters  
 Date 20190924  
 Time 15:06 h  
 INSTRM spect  
 PROBEF 710748\_0067 f  
 PU-PROC 6235  
 TD 6235  
 SOLVENT CDCl3  
 NS 16  
 DS 2  
 SFO 12016.230 Hz  
 FIDRES 0.153359 Hz  
 AQ 2.7262976 sec  
 AS 17.43  
 DA 41.660 used  
 DP 16.00 used  
 OR 289.2 K  
 D1 1.00000000 sec  
 T2 1  
 SFO1 600.137055 MHz  
 NUC1 13  
 F1 8.00 used  
 TMR 6.4613076 K

F2 - Processing Parameters  
 SI 6236  
 SF 600.137055 MHz  
 MDS 16  
 SFO 0  
 TR 0.30 Hz  
 GB 0  
 PC 1.00

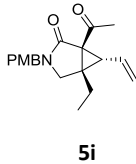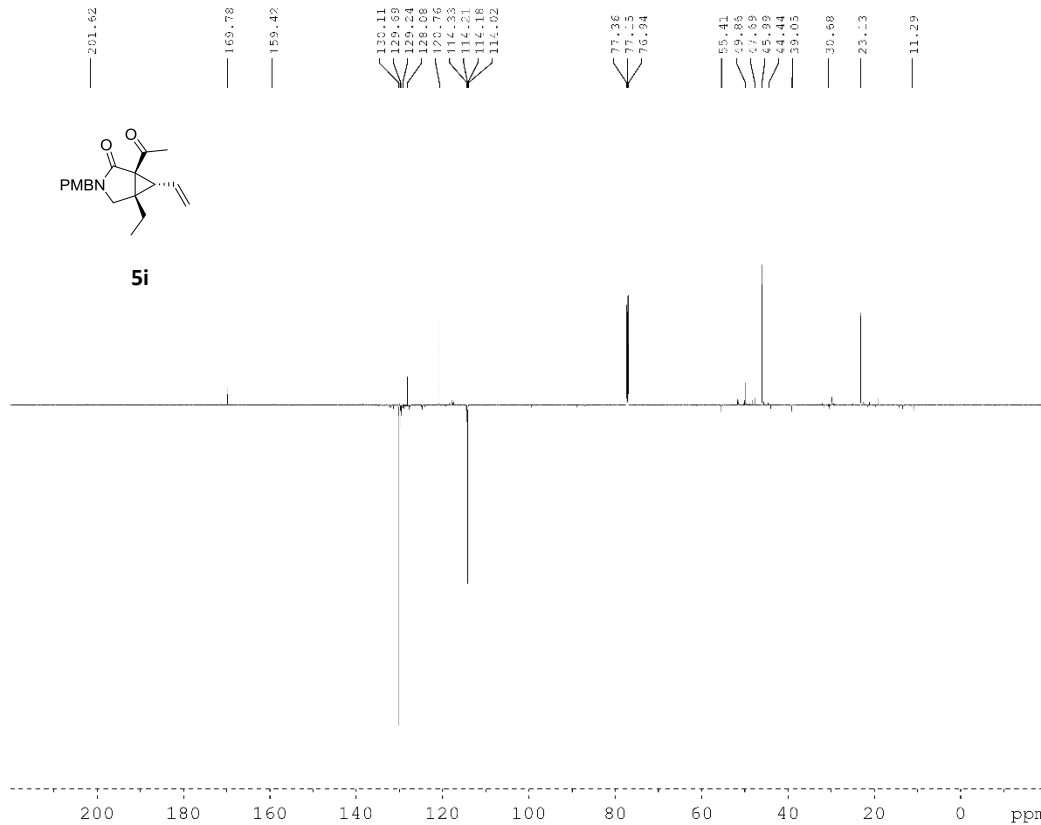

Client Data Parameters  
 NAME JMS624  
 XPRO 0  
 PROCNO 1

F2 - Acquisition Parameters  
 Date 20190924  
 Time 15:06 h  
 INSTRM spect  
 PROBEF 710748\_0067 f  
 PU-PROC 6235  
 TD 6235  
 SOLVENT CDCl3  
 NS 16  
 DS 2  
 SFO 12016.230 Hz  
 FIDRES 0.153359 Hz  
 AQ 2.7262976 sec  
 AS 17.43  
 DA 41.660 used  
 DP 16.00 used  
 OR 289.2 K  
 D1 1.00000000 sec  
 T2 1  
 SFO1 600.137055 MHz  
 NUC1 13  
 F1 8.00 used  
 TMR 6.4613076 K

F2 - Processing Parameters  
 SI 6236  
 SF 600.137055 MHz  
 MDS 16  
 SFO 0  
 TR 0.30 Hz  
 GB 0  
 PC 1.40

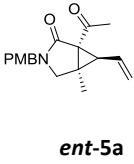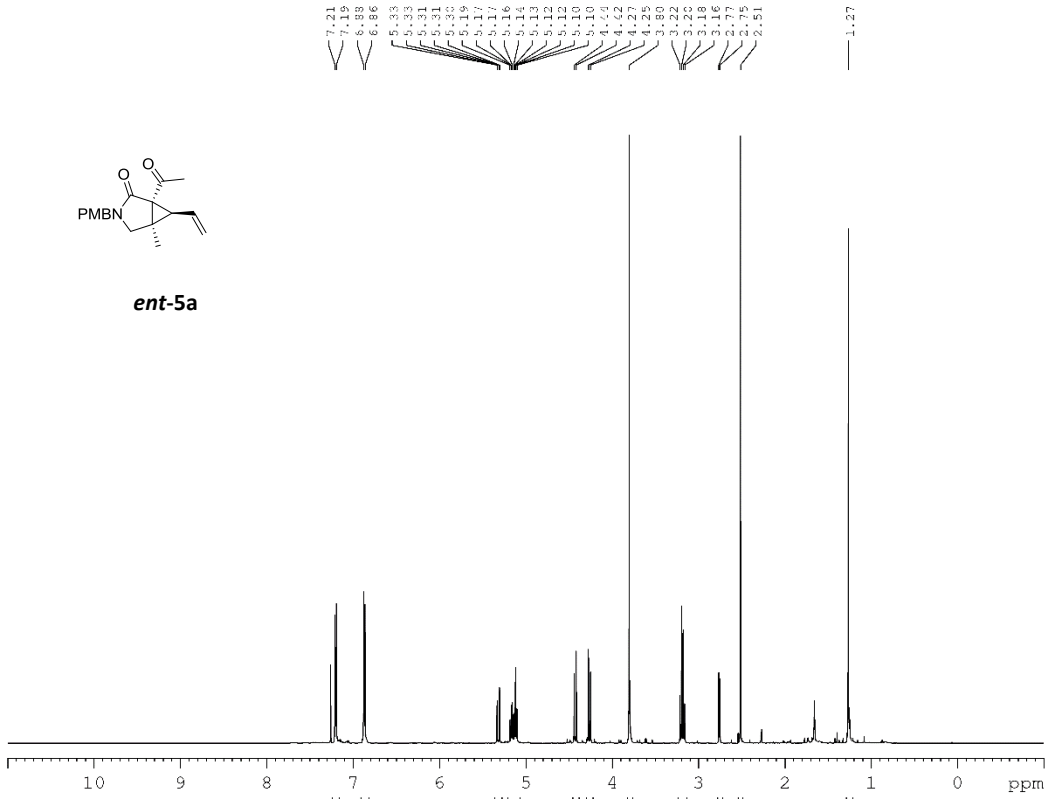

Current Data Parameters  
 NAME JMW96  
 EXPNO 1  
 PROCNO 1  
 F2 - Acquisition Parameters  
 Date\_ 20160220  
 Time 13.05 h  
 INSTRUM spect  
 PROCNO 211768\_0067 ( )  
 PULPROG zgpg  
 LE 62536  
 SOLVENT CDCl3  
 NS 16  
 DS 4  
 SWH 12019.230 Hz  
 FWHM 0.16359 Hz  
 AQ 2.7252975 sec  
 RG 15.93  
 DQ 41.600 msec  
 DP 18.00 msec  
 PC 238.0 K  
 RE 1.0000000 sec  
 DI 1.0000000 sec  
 TD 1  
 SFO1 600.1337000 MHz  
 K001 1  
 P1 8.00 msec  
 P1e1 8.7600016 W  
 F2 - Processing parameters  
 SI 52516  
 SF 600.1300134 MHz  
 WDM 1  
 SSB 0  
 LB 0.30 Hz  
 GB 0  
 PC 1.00

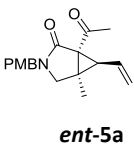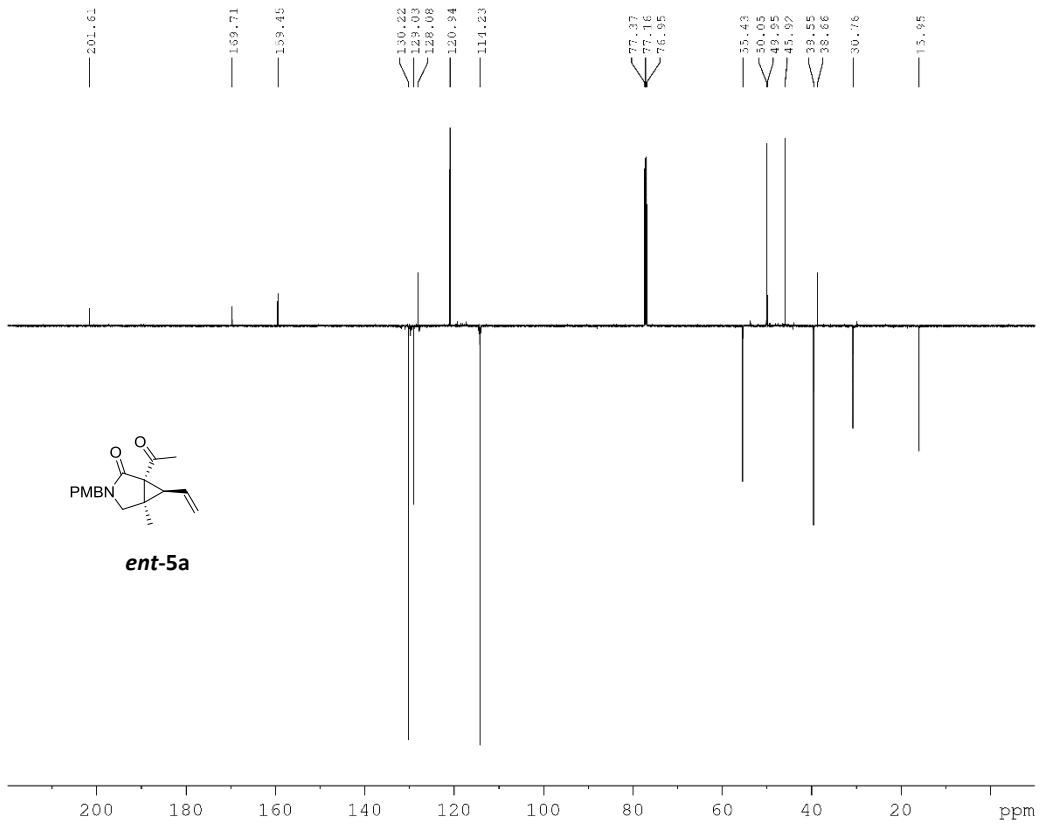

Current Data Parameters  
 NAME JMW96  
 EXPNO 2  
 PROCNO 1  
 F2 - Acquisition Parameters  
 Date\_ 20160220  
 Time 13.19 h  
 INSTRUM spect  
 PROCNO 211768\_0067 ( )  
 PULPROG zgpg  
 LE 62536  
 SOLVENT CDCl3  
 NS 256  
 DS 4  
 SWH 35231.883 Hz  
 FWHM 0.502850 Hz  
 AQ 0.9043958 sec  
 RG 197.44  
 DQ 32.580 msec  
 DP 18.00 msec  
 PC 238.0 K  
 RE 1.0000000 sec  
 DI 1.0000000 sec  
 TD 1  
 SFO1 500.914986 MHz  
 K001 1  
 P1 2.00 msec  
 P2 24.00 msec  
 P1e1 36.22559132 W  
 SFO2 130.1324005 MHz  
 K002 1  
 SFO3 50.176  
 SFO4 50.176  
 P1e2 6.36100016 W  
 P1e3 0.06692187 W  
 F2 - Processing parameters  
 SI 32768  
 SF 500.907961 MHz  
 WDM 1  
 SSB 0  
 LB 1.00 Hz  
 GB 0  
 PC 1.40

# Vinylcyclopentane rearrangement

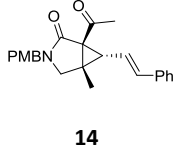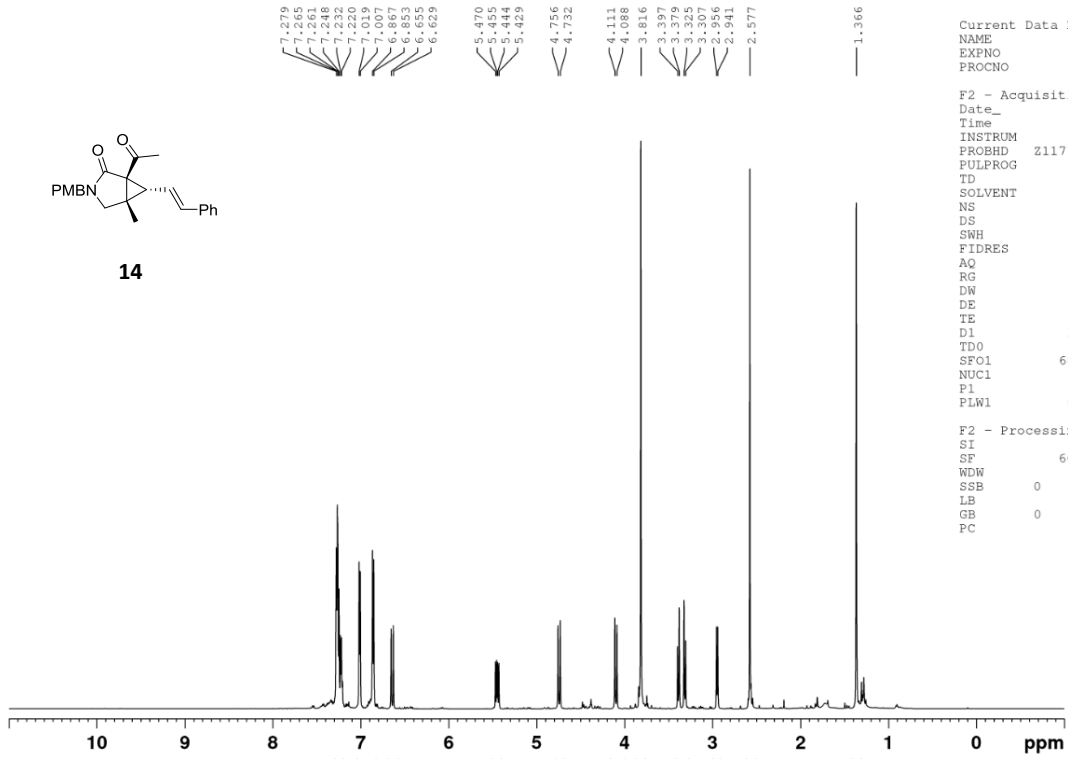

Current Data Parameters  
 NAME SDV068  
 EXPNO 1  
 PROCNO 1

F2 - Acquisition Parameters  
 Date\_ 20180207  
 Time 15.36 h  
 INSTRUM spect  
 PROBHD Z117768\_0057 ( )  
 PULPROG zg30  
 TD 65536  
 SOLVENT CDCl3  
 NS 16  
 DS 2  
 SWH 12019.230 Hz  
 FIDRES 0.183399 Hz  
 AQ 2.7262976 sec  
 RG 14.39  
 DW 41.600 usec  
 DE 18.00 usec  
 TE 298.0 K  
 D1 1.00000000 sec  
 TD0 1  
 SFO1 600.1337058 MHz  
 NUC1 1H  
 P1 8.00 usec  
 PLW1 6.76100016 W

F2 - Processing parameters  
 SI 65536  
 SF 600.1300000 MHz  
 WDW EM  
 SSB 0  
 LB 0.30 Hz  
 GB 0  
 PC 1.00

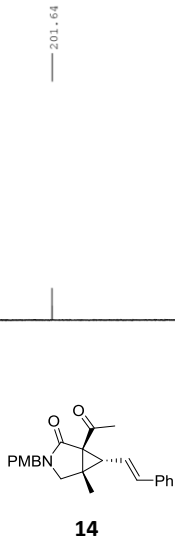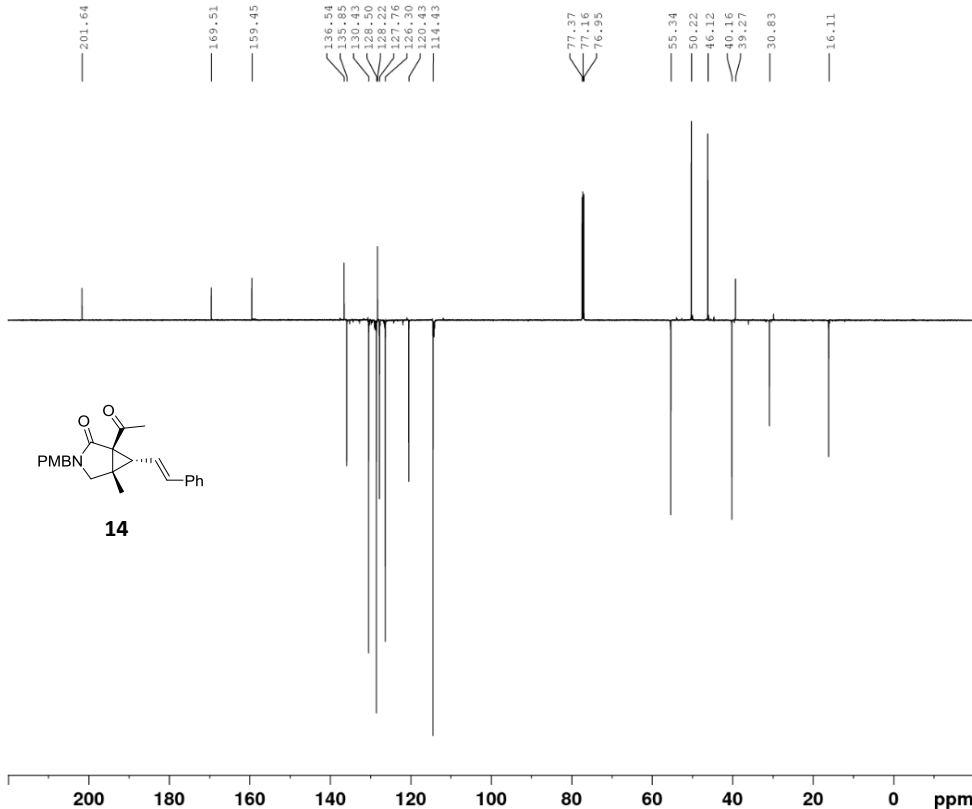

Current Data Parameters  
 NAME SDV068  
 EXPNO 2  
 PROCNO 1

F2 - Acquisition Parameters  
 Date\_ 20180207  
 Time 16.02 h  
 INSTRUM spect  
 PROBHD Z117768\_0057 ( )  
 PULPROG jmod  
 TD 65536  
 SOLVENT CDCl3  
 NS 512  
 DS 4  
 SWH 36231.883 Hz  
 FIDRES 0.552855 Hz  
 AQ 0.9043968 sec  
 RG 199.43  
 DW 13.800 usec  
 DE 18.00 usec  
 TE 298.0 K  
 CNST2 145.0000000  
 CNST11 1.0000000  
 D1 2.0000000 sec  
 D20 0.00689655 sec  
 TD0 1  
 SFO1 150.9178988 MHz  
 NUC1 13C  
 P1 12.00 usec  
 P2 24.00 usec  
 PLW1 88.22599792 W  
 SFO2 600.1324005 MHz  
 NUC2 1H  
 CPDPRG2 waltz16  
 PCPD2 80.00 usec  
 PLW2 6.76100016 W  
 PLW12 0.06699187 W

F2 - Processing parameters  
 SI 32768  
 SF 150.9027930 MHz  
 WDW EM  
 SSB 0  
 LB 1.00 Hz  
 GB 0  
 PC 1.40

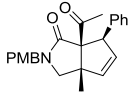

15

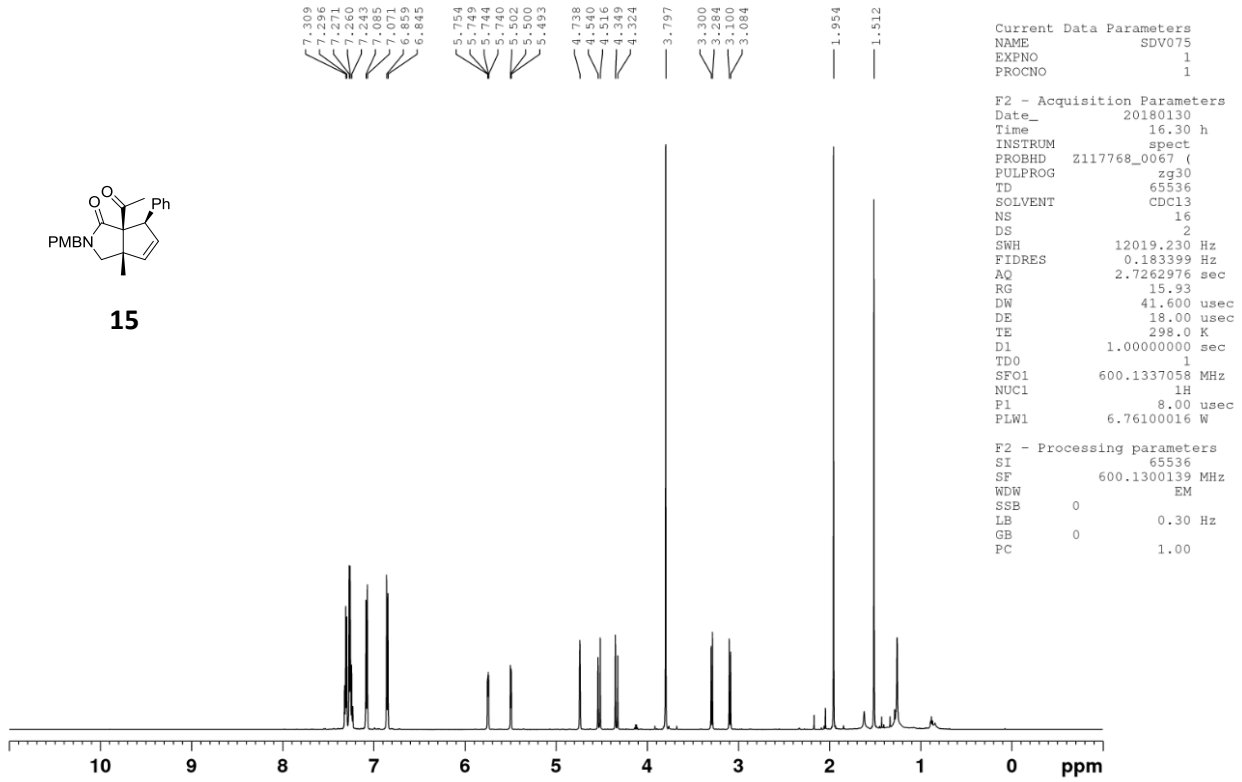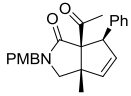

15

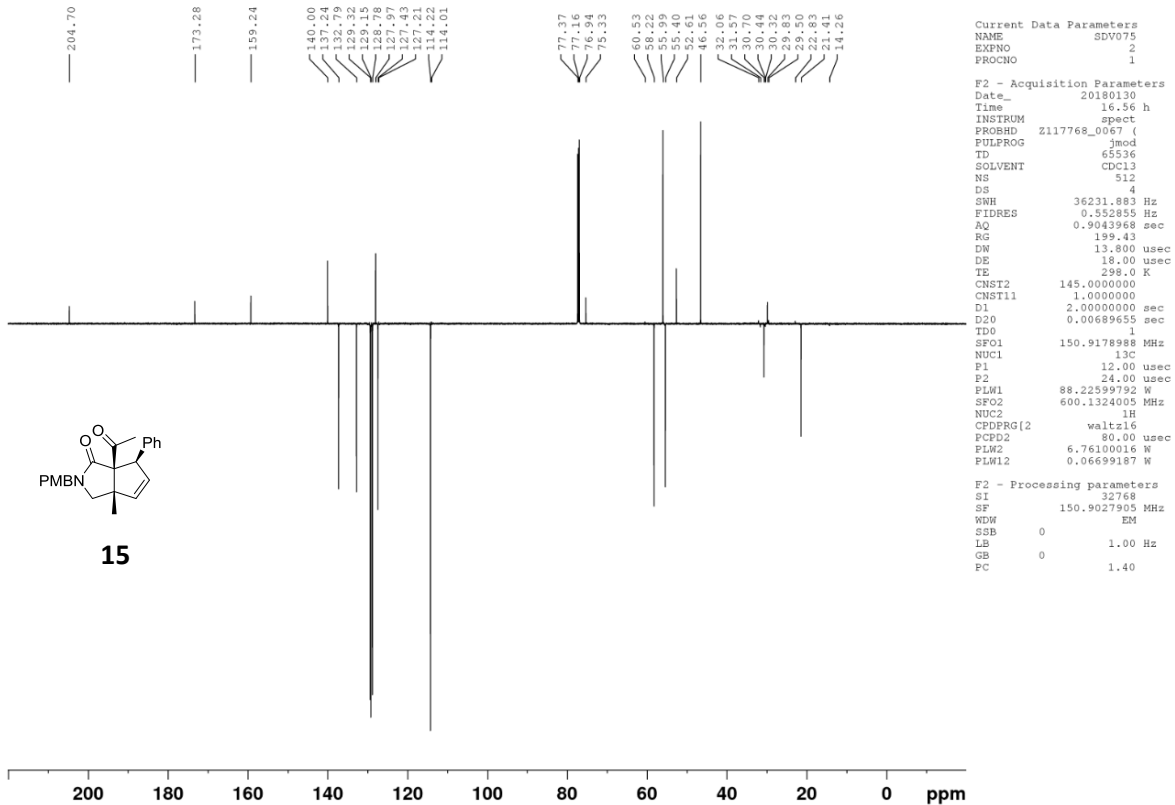



# Vinylcyclopropane cycloaddition

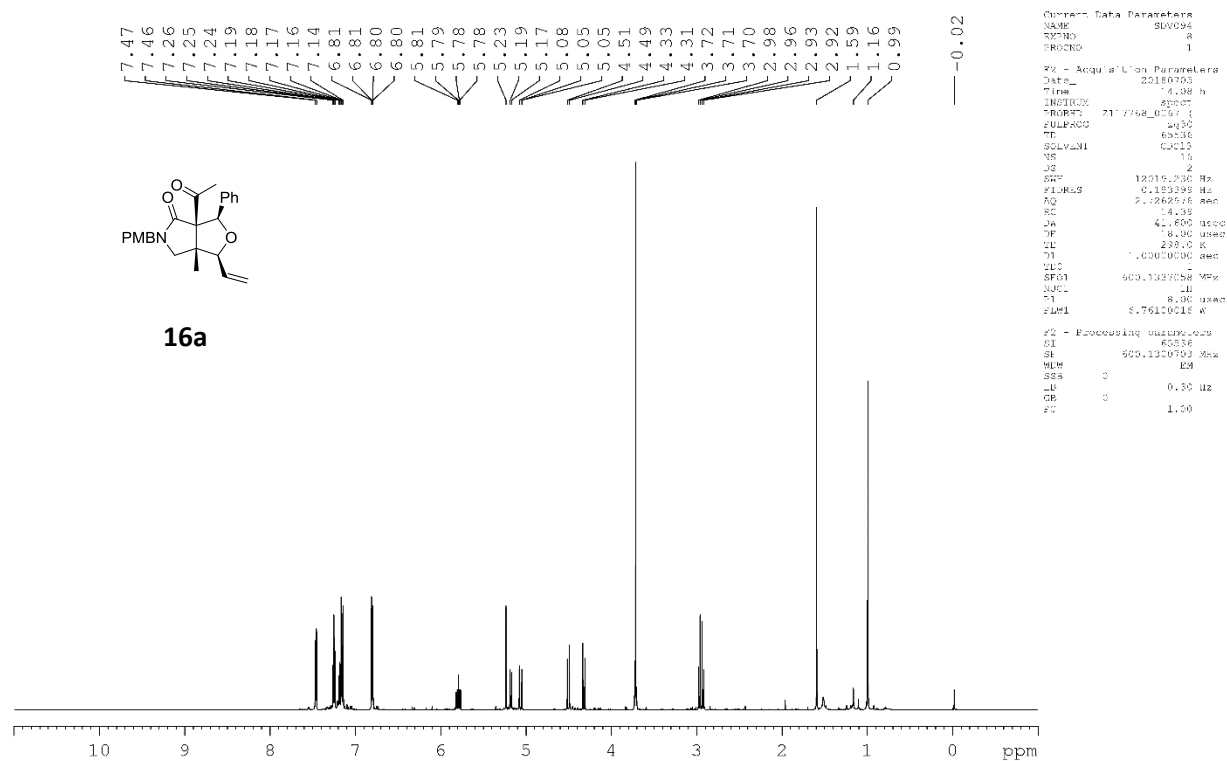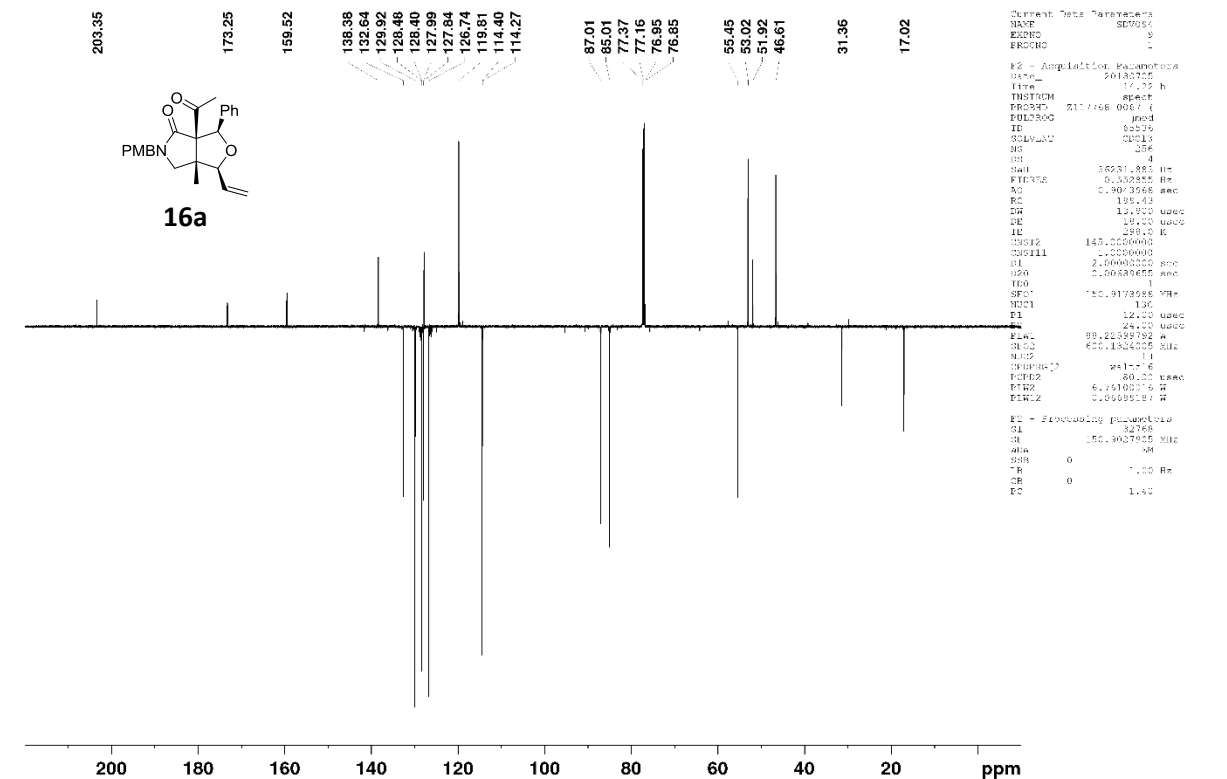

Current Data Parameters  
 NAME: 300094  
 EXPNO: 2  
 PROCNO: 1

F2 - Acquisition Parameters  
 Date\_: 20180703  
 Time: 4.38 h  
 INSTRUM: spect  
 PROBRF: 211766\_0591  
 PULPROG: zgpg  
 TD: 65536  
 SFO1: 500.1327052 MHz  
 SOLVENT: CDCl3  
 NS: 15  
 DS: 2  
 SWH: 12015.230 Hz  
 FIDRES: 0.152399 Hz  
 AQ: 2.1262956 sec  
 RG: 54.39  
 JA: 41.650 usec  
 RF: 8.00 usec  
 HI: 239.0 K  
 V1: 7.0000000 usec  
 V2: 7.0000000 usec  
 SFO2: 500.1327052 MHz  
 VPC: 1.0  
 V1: 8.00 usec  
 FWHM: 0.76110018 s

F2 - Processing parameters  
 SI: 65536  
 SF: 500.1327052 MHz  
 WDW: EM  
 SSB: 0  
 LB: 0.30 Hz  
 GB: 0  
 PC: 1.00

Current Data Parameters  
 NAME: 300094  
 EXPNO: 2  
 PROCNO: 1

F2 - Acquisition Parameters  
 Date\_: 20180703  
 Time: 4.38 h  
 INSTRUM: spect  
 PROBRF: 211766\_0667  
 PULPROG: zgpg  
 TD: 65536  
 SFO1: 500.1327052 MHz  
 SOLVENT: CDCl3  
 NS: 156  
 DS: 4  
 SWH: 16021.881 Hz  
 FIDRES: 0.332855 Hz  
 AQ: 2.0000000 sec  
 RG: 195.43  
 JA: 19.000 usec  
 RF: 19.00 usec  
 HI: 299.0 K  
 V1: 7.0000000 usec  
 V2: 7.0000000 usec  
 SFO2: 500.1327052 MHz  
 VPC: 1.0  
 V1: 12.00 usec  
 V2: 24.00 usec  
 SFO3: 99.2239979 MHz  
 SFO4: 500.1327052 MHz  
 NUC1: 13C  
 NUC2: 13C  
 NUC3: 13C  
 NUC4: 13C  
 P1: 1.00  
 P2: 1.00  
 P3: 1.00  
 P4: 1.00  
 PCPD2: 80.00 usec  
 PPR2: 4.0000000 Hz  
 PPR3: 4.0000000 Hz

F2 - Processing parameters  
 SI: 65536  
 SF: 500.1327052 MHz  
 WDW: EM  
 SSB: 0  
 LB: 1.00 Hz  
 GB: 0  
 PC: 1.00

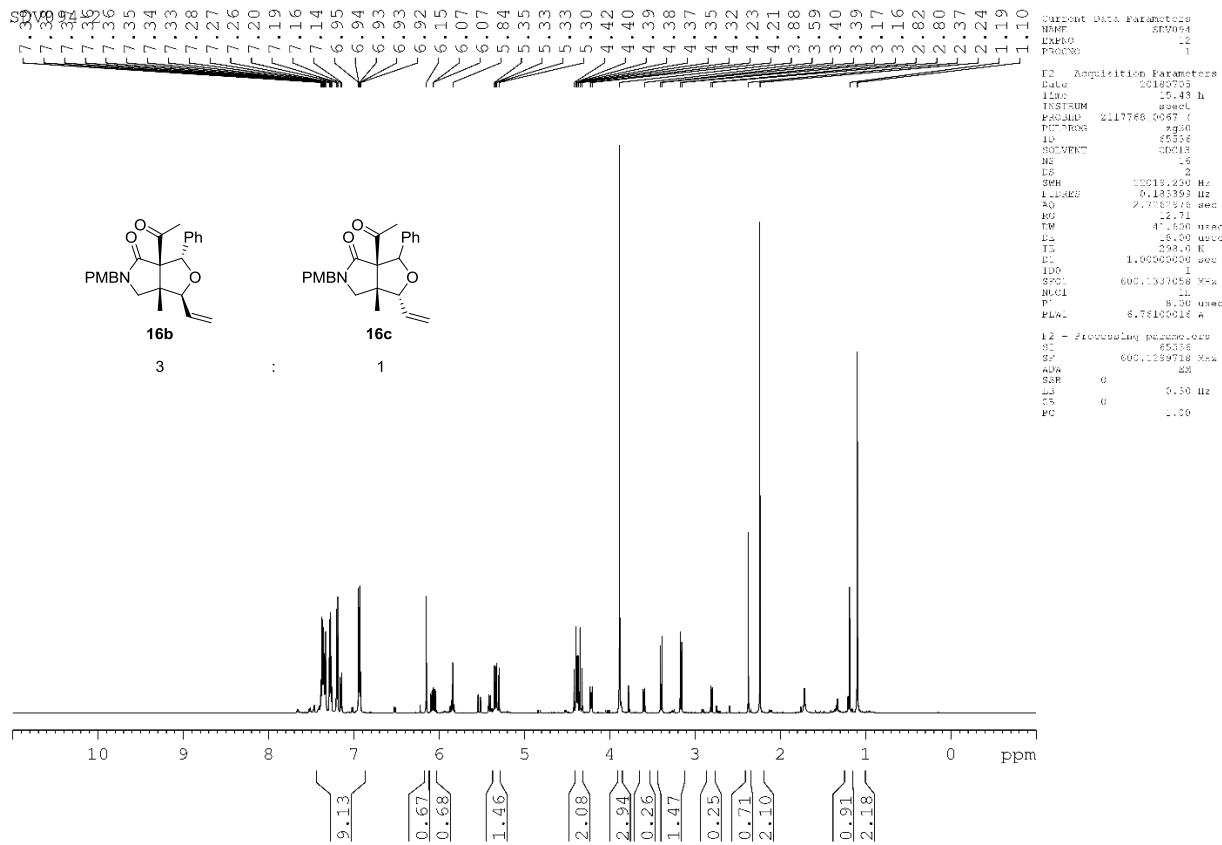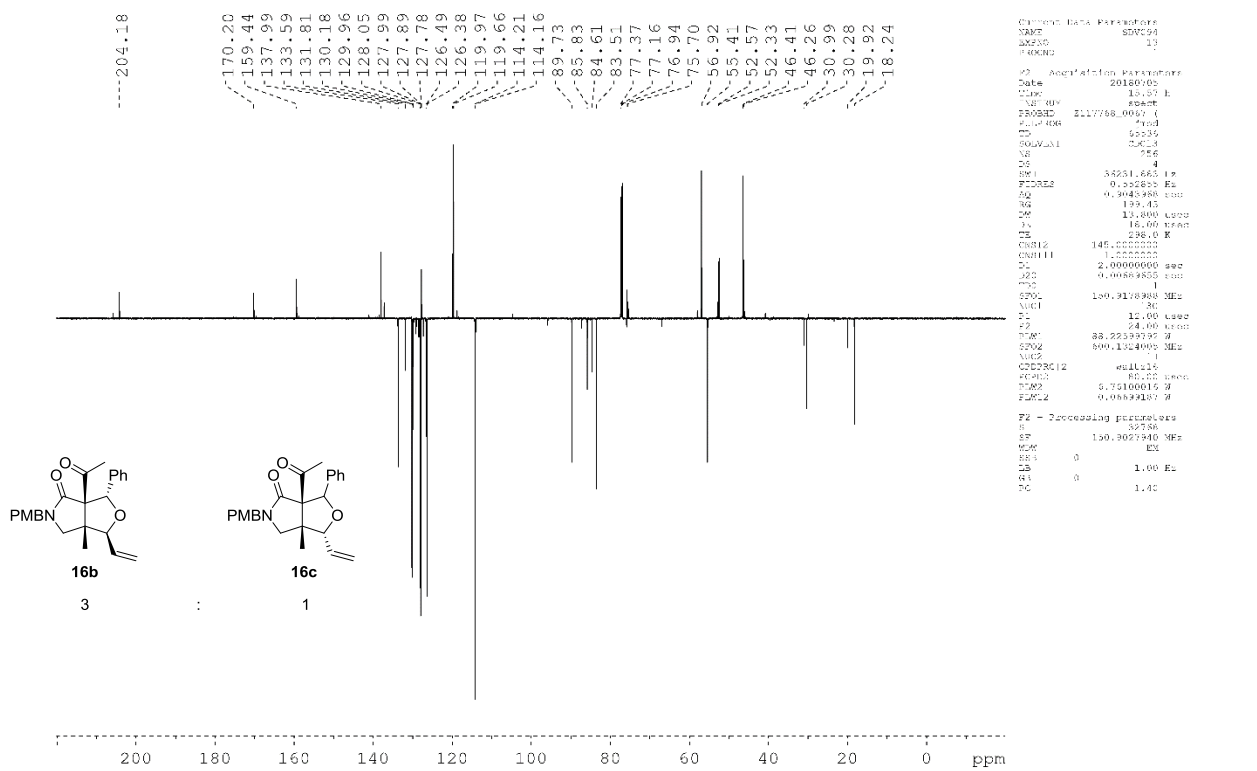

## References

- (1) (a) Sheldrick, G.M., *Acta Cryst.* **2008**, *A64*, 112. (b) Hübschle, C.B.; Sheldrick, G. M.; Dittrich B., *J. Appl. Cryst.* **2011**, *44*, 1281.
- (2) Kiyotsuka, Y.; Katayama, Y.; Acharya, H. P.; Hyodo, T.; Kobayashi, Y., *J. Org. Chem.* **2009**, *74*, 1939-1951.
- (3) Ikeda, S.; Shibuya, M.; Kanoh, N.; Iwabuchi, Y., *Org. Lett.* **2009**, *11*, 1833-1836.
